# Supplementary material for: Genome-wide identification and characterization of abiotic stress responsive GRAS family genes in oat (Avena sativa)
Source: PeerJ. 2023 May 9;11:e15370. doi: 10.7717/peerj.15370 (PMC10178225; doi:10.7717/peerj.15370)
Supplement: Supplemental Information 1 [file peerj-11-15370-s001.xlsx]

## Sheet: Sheet1
Table S1 Sequences of the primers used in this study
Gene Name	Forward primer (5')	Reverse primer (3')
AsGRAS01	TGCTCGACTTCGACATCGGAAT	GAGACCAATGCGGTGACCTTGA
AsGRAS02	ACGTCGTGGACCTCGACATCAT	TCGTTGGGATCGTAGCGTGAAC
AsGRAS03	CGAGGTGGTGGACTGGATATAGTTG	AGGTCGTATGTCAAGATGCTCAAGG
AsGRAS04	GTGCTCGACTTCGACATCGGAAT	GAGACCAATGCGGTGACCTTGA
AsGRAS05	ATCCTCCGCCTAGTTAAGCGACTC	ACGGTGGACTGGAATGCCTGAA
AsGRAS06	GAGGTTGCGGATCTCCAGGTTAA	CAAGTTGCTCTCAGGGCTGTCATA
AsGRAS07	GGCTGTTGCTGAGGACGATGTAT	GGCTGTTGCTGAGGACGATGTAT
AsGRAS08	ACGTCGTGGACCTCGACATCAT	TCGTTGGGATCGTAGCGTGAAC
AsGRAS09	CACAGCTCAGCCTTCACACACT	GGGTCCATACCAAAGGCGAAGT
AsGRAS10	CATTCCAGTCCACCGTGTTCCA	TCAGGAATCGCTCGATCTTGCTC
AsGRAS11	CGCCATCCTCCGCCTAGTTAAG	TGGAACACGGTGGACTGGAATG
AsGRAS12	CGCCATCCTCCGCCTAGTTAAG	GGTGGACTGGAATGCCTGAAACA
AsGRAS13	GTCGCTCAAGGTCACCGCATT	GCTGGAGAGGTTGTCGTGGATG
AsGRAS14	TCGGCGTATTCTTCCAGTTCACC	ACGGAGGATTGCGGGCATTG
AsGRAS15	CTCCACATCTTCTCAGAGCATCTCC	CGCAACCTCGGTAACACAGGAA
AsGRAS16	CCGCCATCCTACGCCTAGTTAAG	CTGGAACACGGTGGACTGGAAC
AsGRAS17	CCGAGGTGGTGGACTGGATATAGT	GGTCGTATGTCAAGATGCTCAAGGT
AsGRAS18	CTTGTAGAGCAGGAGGCGAACAC	TGTCATTCCTCTGGCAAGCAACAT
AsGRAS19	GGTTCACAGCATAGCAATTCCAAGG	TTAGGCACTGAGGAGATGTAGAGGT
AsGRAS20	GATTCTGTTTATGCCCGAGGTGGT	GGTCGTATGTCAAGATGCTCAAGGT
AsGRAS21	CGCCATCCTACGCCTAGTTAAGC	TGGACTGGAACGCCTGGAACA
AsGRAS22	TAGAGCCGTGGACAAGGAGGAC	CTCGCCAGATACCGCAACCATC
AsGRAS23	CACTTGCTGTCAACTTCACTCTCCA	TGCGATTCCTGCTCCACCAATG
AsGRAS24	TGCTAGAGCCGTGGACAAGGA	CTCGCCAGATACCGCAACCATC
AsGRAS25	GCGACTCCGAACAGCAATTACAAC	GAGCATGAAGCCGACGAAGAGG
AsGRAS26	CCAGGTGAAGCACTTGCTGTCA	TGCGATTCCTGCTCCACCAATG
AsGRAS27	TTCTCGCACTTCACCGCCAAC	ATGTCGATGTCGATGACGTGGAC
AsGRAS28	AGTGAGGACAGGACAGAGGAGTTC	GTAAGCACCTAGACGCTGGATTGG
AsGRAS29	AAGTGAGGACAGGACAGAGGAGTTC	GGTAAGCACCTAGACGCTGGATTG
AsGRAS30	CTTCATGCTCGCCGCCAATCT	CGCTTGAGAGTCGCCAGATGAG
GAPDH	GTTTGGCATCGTTGAGGGTT	TGCTGCTGGGAATGATGTTG
