# Supplementary material for: Genome-wide identification and characterization of abiotic stress responsive GRAS family genes in oat (Avena sativa)
Source: PeerJ. 2023 May 9;11:e15370. doi: 10.7717/peerj.15370 (PMC10178225; doi:10.7717/peerj.15370)
Supplement: Supplemental Information 2 [file peerj-11-15370-s002.xlsx]

## Sheet: Sheet1
Table S2 The 30 identified AsGRAS genes in this study.
Gene Name	Gene ID	Sequence Type	Sequence
AsGRAS01	Pepsico1_Contig29889.mrna1	CDS Protein	MRGMPFAAERGSLLLLPQQQLPHPQEIIAKVSGAGFWEPTSVLDRRHSPSPSPPASTLSSEVATLAGGNSFSPPPHQPWPAGEDPGVKEEWAHQLAPLDMGMGLATGEGWDAATPTPGLAGPDSTFLRWIIGGGDDADPPVLELDHATSIMSPPATAFGPNLSSSFAQAMEDTKPAPFPHAPNFLLNQHHPQPHAAFFGANPSFESAQPPPKRHHPMAGAPAPKLPPFPGPLAPAGGFLPALKPKAGAANDEAAAVVDQLAEAAKLAEAGDAFGAREILARLNYRLPAAPAAGTPLLRSAFYFKEALSLALSPTGDTPAPPASTPYEVVVKLGAYKAFSEVSPVLQFAHLTCVQAVLDELRGASCIHVLDFDIGMGEQWASLMQELAQRRPATALKVTA…
AsGRAS02	Pepsico2_Contig16967.mrna1	CDS Protein	TDTTQPSHSPRGIQFHTLVRLMGHYAFGCQQGMDHAAAAASLSGALPLPSAQGAAASYCVDPSAVPPSVAEAESARRHQEEENAAIRLVHLLVTCAHAIQAGDYEAAAGNLAEARSALATTVSTVAGIGRVTSHFAAALAQRLFPASPSHHSAASSSADHAADLYRQFYDAGPYLKFAHFTANQAILEAFEGCDRVHVVDLDIMQGVQWPALIQTLSLRPGGPPALRITGVGRPPAADGSRYDPNEVGVRLAEFARAVNVPFSFRGVPCDTLDALQPWMLQLVRGEALAVNSVCQLHRLLVDPDAASTSLPSPIDAVLGWIAAMQPRVFTVVEQEADHNKPALVERFTNALYYYGTVFDSMEAMSAHTTGGLGAEAYLQREIFDIVCGEGSARVERHEP…
AsGRAS03	Pepsico2_Contig1709.mrna2	CDS Protein	MSAKASDRAYRCTDDSQMAYYNNSVPLGQNGRFYVTQNHLDVHHVSSDDGSQKIRSNPQVFEPQYCTLESSSGNGVYPTQSSTSSQSISPISGSPLSQHDSHSDHVYGSPPSASCVTEVADLQVKLKELENAILGPELDIAYDSPESNLQANNPLKSDDWKQLLGINTGDLKEVIIACGRAVAEDDVFATELLLSELGQLVSVSGDPMQRLGAYMLEGLVARLSSSGSKIYKSLKCKEPTGSELMSYMTLLYEICPFYKFGYMSANGAIAEAIKGENFVHVIDFQIAQGSQWVTVIQALAARPGGPPCLRITGIDDSDSVYARGGGLDIVGARLCNVSRTCGLPFEFNAVPASSHEVYLEHLDIRPGEVVAVNFAYQLHHTPDESVSTENHRDRILRMI…
AsGRAS04	Pepsico1_Contig26725.mrna2	CDS Protein	MRGMPFAAERGSLLLLPQQQLPQEIIAKVSGAGFWEPTSVLDRRHSPSPSPPASTLSSEVATLAGGNSFSPPPHQPWPAGEDPGVKEEWAHQLAPLDMGMGLATGEGWDAATPTPGLAGPDSTFLRWIIGGGDDADPPVLELDHATSIMSPPATAFGPNLSSSFAQAMEDTKPAPFPHAPNFLLNQHHPQPHAAFFGANPSFESAQPPPKRHHPMAGAPAPKLPPFPGPLAPAGGFLPALKPKAGAANDEAAAVVDQLAEAAKLAEAGDAFGAREILARLNYRLPAAPAAGTPLLRSAFYFKEALSLALSPTGDTPAPPASTPYEVVVKLGAYKAFSEVSPVLQFAHLTCVQAVLDELRGASCIHVLDFDIGMGEQWASLMQELAQRRPATALKVTALV…
AsGRAS05	Pepsico1_Contig13965.mrna2	CDS Protein	MRGMPFAAERGSLLLLPQQQLPQEIIAKVSGAGFWEPTSVLDRRHSPSPSPPASTLSSEVATLAGGNSFSPPPHQPWPAGEDPGVKEEWAHQLAPLDMGMGLATGEGWDAATPTPGLAGPDSTFLRWIIGGGDDADPPVLELDHATSIMSPPATAFGPNLSSSFAQAMEDTKPAPFPHAPNFLLNQHHPQPHAAFFGANPSFESAQPPPKRHHPMAGAPAPKLPPFPGPLAPAGGFLPALKPKAGAANDEAAAVVDQLAEAAKLAEAGDAFGAREILARLNYRLPAAPAAGTPLLRSAFYFKEALSLALSPTGDTPAPPASTPYEVVVKLGAYKAFSEVSPVLQFAHLTCVQAVLDELRGASCIHVLDFDIGMGEQWASLMQELAQRRPATALKVTALV…
AsGRAS06	Pepsico1_Contig30502.mrna2	CDS Protein	MSAKASDRAYRCTDDSQMAYYNNSVPLGQNGRFYVTQNHLDVHHVSSDDGSQKIRSNPQVFEPQYCTLESSSGNGVYPTQSSTSSQSISPISGSPLSQHDSHSDHVYGSPPSASCVTEVADLQVKLKELENAILGPELDIAYDSPESNLQANNPLKSDDWKQLLGINTGDLKEVIIACGRAVAEDDVFATELLLSELGQLVSVSGDPMQRLGAYMLEGLVARLSSSGSKIYKSLKCKEPTGSELMSYMTLLYEICPFYKFGYMSANGAIAEAIKGENFVHVIDFQIAQGSQWVTVIQALAARPGGPPCLRITGIDDSDSVYARGGGLDIVGARLCNVSRTCGLPFEFNAVPASSHEVYLEHLDIRPGEVVAVNFAYQLHHTPDESVSTENHRDRILRMI…
AsGRAS07	Pepsico1_Contig18352.mrna2	CDS Protein	MSAKASDRAYRCTDDSQMAYYNNSVPLGQNGRFYVTQNHLDVHHVSSDDGSQKIRSNPQVFEPQYCTLESSSGNGVYPTQSSTSSQSISPISGSPLSQHDSHSDHVYGSPPSASCVTEVADLQVKLKELENAILGPELDIAYDSPESNLQANNPLKSDDWKQLLGINTGDLKEVIIACGRAVAEDDVFATELLLSELGQLVSVSGDPMQRLGAYMLEGLVARLSSSGSKIYKSLKCKEPTGSELMSYMTLLYEICPFYKFGYMSANGAIAEAIKGENFVHVIDFQIAQGSQWVTVIQALAARPGGPPCLRITGIDDSDSVYARGGGLDIVGARLCNVSRTCGLPFEFNAVPASSHEVYLEHLDIRPGEVVAVNFAYQLHHTPDESVSTENHRDRILRMI…
AsGRAS08	Pepsico1_Contig25100.mrna1	CDS Protein	MRGMPFAAERGSLLLLPQQQLPHPQEIIAKVSGAGFWEPTSVLDRRHSPSPSPPASTLSSEVATLAGGNSFSPPPHQPWPAGEDPGVKEEWAHQLAPLDMGMGLATGEGWDAATPTPGLAGPDSTFLRWIIGGGDDADPPVLELDHATSIMSPPATAFGPNLSSSFAQAMEDTKPAPFPHAPNFLLNQHHPQPHAAFFGANPSFESAQPPPKRHHPMAGAPAPKLPPFPGPLAPAGGFLPALKPKAGAANDEAAAVVDQLAEAAKLAEAGDAFGAREILARLNYRLPAAPAAGTPLLRSAFYFKEALSLALSPTGDTPAPPASTPYEVVVKLGAYKAFSEVSPVLQFAHLTCVQAVLDELRGASCIHVLDFDIGMGEQWASLMQELAQRRPATALKVTA…
AsGRAS09	Pepsico2_Contig4966.mrna2	CDS Protein	RPDTHSSAFTHSPRAVASSTLVRLMGHFAFGMDPAVASSLAGALPHPSAQGVAAMTNGAGLSYCVDPSMRTLVLPAVPVPPTVAEAEAARRREEGENAAIRLVNLLVACARAIQAGDYAAAAGNLNEARMGLGTTVSTAGGIGRVLSHFAAALAQRLFPGSPSHTVAASSAEHAGNLYGQFYEAGPYLKFAHFTATRPSWRRSKAATACTSWTSPS*
AsGRAS10	Pepsico2_Contig7359.mrna1	CDS Protein	MRGMPFAAERGSLLLLPQQQLPHPQEIIAKVSGAGFWEPTSVLDRRHSPSPSPPASTLSSEVATLAGGNSFSPPPHQPWPAGEDPGVKEEWAHQLAPLDMGMGLATGEGWDAATPTPGLAGPDSTFLRWIIGGGDDADPPVLELDHATSIMSPPATAFGPNLSSSFAQAMEDTKPAPFPHAPNFLLNQHHPQPHAAFFGANPSFESAQPPPKRHHPMAGAPAPKLPPFPGPLAPAGGFLPALKPKAGAANDEAAAVVDQLAEAAKLAEAGDAFGAREILARLNYRLPAAPAAGTPLLRSAFYFKEALSLALSPTGDTPAPPASTPYEVVVKLGAYKAFSEVSPVLQFAHLTCVQAVLDELRGASCIHVLDFDIGMGEQWASLMQELAQRRPATALKVTA…
AsGRAS11	Pepsico1_Contig19030.mrna1	CDS Protein	MRGMPFAAERGSLLLLPQQQLPHPQEIIAKVSGAGFWEPTSVLDRRHSPSPSPPASTLSSEVATLAGGNSFSPPPHQPWPAGEDPGVKEEWAHQLAPLDMGMGLATGEGWDAATPTPGLAGPDSTFLRWIIGGGDDADPPVLELDHATSIMSPPATAFGPNLSSSFAQAMEDTKPAPFPHAPNFLLNQHHPQPHAAFFGANPSFESAQPPPKRHHPMAGAPAPKLPPFPGPLAPAGGFLPALKPKAGAANDEAAAVVDQLAEAAKLAEAGDAFGAREILARLNYRLPAAPAAGTPLLRSAFYFKEALSLALSPTGDTPAPPASTPYEVVVKLGAYKAFSEVSPVLQFAHLTCVQAVLDELRGASCIHVLDFDIGMGEQWASLMQELAQRRPATALKVTA…
AsGRAS12	Pepsico1_Contig14278.mrna1	CDS Protein	MRGMPFAAERGSLLLLPQQQLPHPQEIIAKVSGAGFWEPTSVLDRRHSPSPSPPASTLSSEVATLAGGNSFSPPPHQPWPAGEDPGVKEEWAHQLAPLDMGMGLATGEGWDAATPTPGLAGPDSTFLRWIIGGGDDADPPVLELDHATSIMSPPATAFGPNLSSSFAQAMEDTKPAPFPHAPNFLLNQHHPQPHAAFFGANPSFESAQPPPKRHHPMAGAPAPKLPPFPGPLAPAGGFLPALKPKAGAANDEAAAVVDQLAEAAKLAEAGDAFGAREILARLNYRLPAAPAAGTPLLRSAFYFKEALSLALSPTGDTPAPPASTPYEVVVKLGAYKAFSEVSPVLQFAHLTCVQAVLDELRGASCIHVLDFDIGMGEQWASLMQELAQRRPATALKVTA…
AsGRAS13	Pepsico1_Contig14835.mrna1	CDS Protein	MRGMPFAAAGERGSPPLLLLQQQQQLPQEIIDKVSAGFWEPTSVLDRRHSPSPSPPASTLSTEVATLAGGNNVSPPPQAWPAGEEPGVKEEWAHQLAPLDMGLGTGEGWDAATATPGLAGPDSTFLRWIIGGGEDADPPVLELDHATSMMSPPATAFGTNLSSSFAQAMEDTKPAPFAHAPSFLLNQHHPQPHAAFFGAHPSSFELAQPPPKRHHPMGGAPAPKLPPFQGPLAPAGGFLPALKPKAGAANDEAAAVVDQLAEAAKLAEAGDAFGAREILARLNYRLPAAPAAGTPLLRSAFYFKEALSLALSPTGDTPATPASTPYEVVVKLGAYKAFSELSPVLQFAHLTCVQAVLDDLRGASCIHVLDFDIGMGEQWASLMQELAQRRPATSLKVTA…
AsGRAS14	Pepsico1_Contig27727.mrna1	CDS Protein	MRGMPFAAAGERGSPPLLLLQQQQQLPQEIIDKVSAGFWEPTSVLDRRHSPSPSPPASTLSTEVATLAGGNNVSPPPQAWPAGEEPGVKEEWAHQLAPLDMGLGTGEGWDAATATPGLAGPDSTFLRWIIGGGEDADPPVLELDHATSMMSPPATAFGTNLSSSFAQAMEDTKPAPFAHAPSFLLNQHHPQPHAAFFGAHPSSFELAQPPPKRHHPMGGAPAPKLPPFQGPLAPAGGFLPALKPKAGAANDEAAAVVDQLAEAAKLAEAGDAFGAREILARLNYRLPAAPAAGTPLLRSAFYFKEALSLALSPTGDTPATPASTPYEVVVKLGAYKAFSELSPVLQFAHLTCVQAVLDDLRGASCIHVLDFDIGMGEQWASLMQELAQRRPATSLKVTA…
AsGRAS15	Pepsico1_Contig30502.mrna1	CDS Protein	MSAKASDRAYRRTDDSQMAYYNNSVPLGQNGRFYVTQNHLDVHYVSSDDGSQKIRSNPQVFEPQYCTLESSSGNGVYPTQSSTSSQSISPISGSPLSQHDSHSDHVYGSPPSASCVTEVADLQVKLKELENAILGPELDIAYDSPESNLQANNPLKPDDWKQLLGINTGDLKEVIIACGRAVAEDDVFATELLLSELGQLVSVSGDPMQRLGAYMLEGLVARLSSSGSKIYKSLKCKEPTGSELMSYMTLLYEICPFYKFGYMSANGAIAEAIKGENFVHVIDFQIAQGSQWVTVIQALAARPGGPPCLRITGIDDSDSVYARGGGLDIVGARLCNVSRTCGLPFEFNAVPASSHEVYLEHLDIRPGEVVAVNFAYQLHHTPDESVSTENHRDRILRMI…
AsGRAS16	Pepsico2_Contig7359.mrna2	CDS Protein	MRGMPFAAERGSLLLLPQQQQPQEIIAKVSGAGFWEPTSVLDRRHSPSPSPPASTLSSDVATLAGGNSVSPPPHQPWPAGEDPGVKEEWAHQLAPLDMGMGLATGEGWDAATPTPGLAGPDSTFLRWIIGGGDDADPPVLELDHATSIMSPPATAFGSNLSSSFAQAMEDTKPAPFPHAPSFLLNQHHPQPHAAFFGAHTSFESAQPPPKRHHPMAAAPAPKLPPFPGPLAPAGGFLPALKPKAGAANDEAAAVVDQLAEAAKLAEAGDAFGAREILARLNYRLPAAPAAGTPLLRSAFYFKEALSLALSPNGDTPSPPASTPYEVVVKLGAYKAFSEVSPVLQFAHLTCVQAVLDELRGASCIHVLDFDIGMGEQWASLMQELAQRRPATALKVTALV…
AsGRAS17	Pepsico1_Contig18352.mrna1	CDS Protein	MSAKASDRAYRRTDDSQMAYYNNSVPLGQNGRFYVTQNHLDVHYVSSDDGSQKIRSNPQVFEPQYCTLESSSGNGVYPTQSSTSSQSISPISGSPLSQHDSHSDHVYGSPPSASCVTEVADLQVKLKELENAILGPELDIAYDSPESNLQANNPLKPDDWKQLLGINTGDLKEVIIACGRAVAEDDVFATELLLSELGQLVSVSGDPMQRLGAYMLEGLVARLSSSGSKIYKSLKCKEPTGSELMSYMTLLYEICPFYKFGYMSANGAIAEAIKGENFVHVIDFQIAQGSQWVTVIQALAARPGGPPCLRITGIDDSDSVYARGGGLDIVGARLCNVSRTCGLPFEFNAVPASSHEVYLEHLDIRPGEVVAVNFAYQLHHTPDESVSTENHRDRILRMI…
AsGRAS18	Pepsico2_Contig16943.mrna3	CDS Protein	MSMQASNQSYKYPDSSQIPYYNSSIYMEENSTCYVQQNHVDLHYVSSDGGSQHSNSKAQVFQPQYCTLNSSSANCVYPSHTSTSPQCLSRSHLSEHDRHSDHSYDSSASASCITEVPSLKFTTLKELENAMYGSESGVVSSESSVIGTALDQSNWRELLGVNSGDLKQVIVACGKAVDENHCRKDLLISELEKMVSVSGEPMQRLGAYMLEGLVARRSSTGHALYKSLKCKEPQPTNSELMSYMRLLYDICPFFKFGYMSANGAIAEAVKGENFIHIIDFQIAQGSQWETMMQAFAVRPDGPPFLRITGIDDSDSAYARGGGLDIVGRKLYSIAQKCSLPFEFNAVHAASHEVTLEHLGIRYGEAIAVNFPYQLHHTPDESVCTENHRDRILRMVKSLS…
AsGRAS19	Pepsico2_Contig5101.mrna1	CDS Protein	MSMQASNQSYKYPDSSQIPYYNSSIYMEENSTCYVQQNHVDLHYVSSDGGSQHSNSKAQVFQPQYCTLNSSSANCVYPSHTSTSPQCLSRSHLSEHDRHSDHSYDSSASASCITEVPSLKFTTLKELENAMYGSESGVVSSESSVIGTALDQSNWRELLGVNSGDLKQVIVACGKAVDENHCRKDLLISELEKMVSVSGEPMQRLGAYMLEGLVARRSSTGHALYKSLKCKEPQPTNSELMSYMRLLYDICPFFKFGYMSANGAIAEAVKGENFIHIIDFQIAQGSQWETMMQAFAVRPDGPPFLRITGIDDSDSAYARGGGLDIVGRKLYSIAQKCSLPFEFNAVHAASHEVTLEHLGIRYGEAIAVNFPYQLHHTPDESVCTENHRDRILRMVKSLS…
AsGRAS20	Pepsico2_Contig1709.mrna1	CDS Protein	MSAKASDRAYRRTDDSQMAYYNNSVPLGQNGRFYVTQNHLDVHYVSSDDGSQKIRSNPQVFEPQYCTLESSSGNGVYPTQSSTSSQSISPISGSPLSQHDSHSDHVYGSPPSASCVTEVADLQVKLKELENAILGPELDIAYDSPESNLQANNPLKPDDWKQLLGINTGDLKEVIIACGRAVAEDDVFATELLLSELGQLVSVSGDPMQRLGAYMLEGLVARLSSSGSKIYKSLKCKEPTGSELMSYMTLLYEICPFYKFGYMSANGAIAEAIKGENFVHVIDFQIAQGSQWVTVIQALAARPGGPPCLRITGIDDSDSVYARGGGLDIVGARLCNVSRTCGLPFEFNAVPASSHEVYLEHLDIRPGEVVAVNFAYQLHHTPDESVSTENHRDRILRMI…
AsGRAS21	Pepsico1_Contig29889.mrna2	CDS Protein	MRGMPFAAERGSLLLLPQQQQPQEIIAKVSGAGFWEPTSVLDRRHSPSPSPPASTLSSDVATLAGGNSVSPPPHQPWPAGEDPGVKEEWAHQLAPLDMGMGLATGEGWDAATPTPGLAGPDSTFLRWIIGGGDDADPPVLELDHATSIMSPPATAFGSNLSSSFAQAMEDTKPAPFPHAPSFLLNQHHPQPHAAFFGAHTSFESAQPPPKRHHPMAAAPAPKLPPFPGPLAPAGGFLPALKPKAGAANDEAAAVVDQLAEAAKLAEAGDAFGAREILARLNYRLPAAPAAGTPLLRSAFYFKEALSLALSPNGDTPSPPASTPYEVVVKLGAYKAFSEVSPVLQFAHLTCVQAVLDELRGASCIHVLDFDIGMGEQWASLMQELAQRRPATALKVTALV…
AsGRAS22	Pepsico1_Contig17925.mrna1	CDS Protein	MTDTPTSRMVHPFSNMQRQNPNQFQYSPNQQHPCRPYQSPPDTRVVPQHHYSLNSHSPDASYENQVTDMKYTLDSSAAAGCMRRDSPSSNSFTPPSIRSGSGSPSSQDDSHSDSTHGSPVSASCVTVTEDPNDLKQKLKDLEAVMLGPDSEIVNSLERSVAYQLSLEPEKWMQMRGFPRGNLKELLITCARAVDKEDRLAIDMLVSELRKMVAVSGEPLDRLGAYMVEGLIARLASSGHSIYKALKCKEPKSSDLLSYMHFLYEACPYFKFGYMSANGAIAEAVKGEDRIHIIDFHISQGAQWIFLLQHSQLGLVGHQL*
AsGRAS23	Pepsico2_Contig10379.mrna3	CDS Protein	MDLHQLLKYRLTGANILYQIPTESNLANSSWPTIPLKLELSNSPYTPLSSQLDCDNLSALSNTPDNQSSTETISAQPISPLEAESSYIKAGSHHRENIQVRPDPLYATSRHNMQQTLRDIETVLMAPDADDATTSTKHDFEETKPAQLMRQRSRTWSHESRQPLPGAVRPQFASGGYPMASYEFRPEKRQRELREDPQLIVKHLLTRCAEALSEDRIEEFLKLVQDARGTVSINGEPIQRLGAYLLEGLVARHGNSGTNIYRALKCREPESTELLSYMKILYNICPYFKFGYMAANGAIAEALRSEDNIHIIDFQIAQGTQWITLIQALAARPGGPPHVRITGIDDPVSEYARGEGLDIVGNMLKSMSKEFNIPLEFTPLPVYATQVTKEMLEIRPGEA…
AsGRAS24	Pepsico1_Contig36247.mrna1	CDS Protein	MTDTPTSRMVHPFSNMQRQNPNQFQYSPNQQHPCRPYQSPPDTRVVPQHHYSLNSHSPDASYENQVTDMKYTLDSSAAAGCMRRDSPSSNSFTPPSIRSGSGSPSSQDDSHSDSTHGSPVSASCVTVTEDPNDLKQKLKDLEAVMLGPDSEIVNSLERSVAYQLSLEPEKWMQMRGFPRGNLKELLITCARAVDKEDRLAIDMLVSELRKMVAVSGEPLDRLGAYMVEGLIARLASSGHSIYKALKCKEPKSSDLLSYMHFLYEACPYFNSATCRRTARLQRLSREKTGST*
AsGRAS25	Pepsico1_Contig17438.mrna1	CDS Protein	MEPGGPWRDPRQGYLYGLGSPMQMPPQQRPDPAAVGGVLKRSLGEIERWQQQRQVAMQQELYLRAVRQRTAAMSTAVSPLASVDVAALLGGGGLSQQPLIFSGSSLGGGGLAAPSSTLSSLTTASRAAMPLIQQHVHRQAHFVPPSVQAQPHAFGVARTPPAPSGGSELSILQELEKQLLGDDEEAEPAMSGTGSTLTSSEWEDTIQRLNSITAAAAPSPPPSFPAVATPNSNYNAGMTRSPSNSSTSTASSSASCSPPISVTTSRQLLSEAAVAIADGNLEAAAAHLATLKRAVNPRGDAEHRLLAMMVAALSSRIAPSASASSQQLADLCGTEHRTGCQFLHDISPCFRLALDAANIAVIDAVAGHRAIHLVDFDISGPQHAALIQSLADRRVPGTS…
AsGRAS26	Pepsico2_Contig1385.mrna1	CDS Protein	MDLHQLLKYRLTGANILYQIPTESNLANSSWPTIPLKLELSNSPYTPLSSQLDCDNLSALSNTPDNQSSTETISAQPISPLEAESSYIKAGSHHRENIQVRPDPLYATSRHNMQQTLRDIETVLMAPDADDATTSTKHDFEETKPAQLMRQRSRTWSHESRQPLPGAVRPQFASGGYPMASYEFRPEKRQRELREDPQLIVKHLLTRCAEALSEDRIEEFLKLVQDARGTVSINGEPIQRLGAYLLEGLVARHGNSGTNIYRALKCREPESTELLSYMKILYNICPYFKFGYMAANGAIAEALRSEDNIHIIDFQIAQGTQWITLIQALAARPGGPPHVRITGIDDPVSEYARGEGLDIVGNMLKSMSKEFNIPLEFTPLPVYATQVTKEMLEIRPGEA…
AsGRAS27	Pepsico2_Contig8490.mrna1	CDS Protein	MIQGVLSRAPATDAAAAMKAKRAASIPEDEETARGKRLQLHDSAAEQEQGLAVAAGEDRERVVVAEAAETRGLRLLRLLLRCAEAVAVDQLPEARDMLQEVAELASPFGSSPERVAAYFGDALCARVLSSYLGAYSPLAVSPLAAAQSRRISSAFQAYNALSPLVKFSHFTANKAILQALDGEDRVHVIDIDIMQGLQWPGLFHMLASRPCRPLSLRVTGLGASLDVLEATGRRLADFAASLGLPFEFQPIQGKIGHVADTAALLGPPRHHHHHREATVVYWMHHCLYDVTGSDVGTVRLLKSLRPKLITIVEQDLGHSGDFLGRFVEALHYYSALFDALGDGASAGAEEERHAVERLLLGAEIRNIVAVGGPKRTGEVRVERWGDELRRAGFRPVSLS…
AsGRAS28	Pepsico2_Contig1385.mrna2	CDS Protein	MDLHQLLKYRLTGANVLYQIPTESNLANSSWPTNPLKLEFSNSPYTPLSTQLECDNLSALSNTPDNQSSTETISAQPISPLEAESSYIKAGSHLRENIQVRPDPLYATSRHNMQQTLRDIETVLMAPDADDATTSTKHDFEETKPAQLMRQRSRTWSHESRQPLPGAVRPQFASGGYPTAGYEFRPVKRQRELREDPQLIVKHLLTRCAEALSEDRTEEFLKLVQDARGTVSINGEPIQRLGAYLLEGLVARHGNSGTNIYRALKCREPESTELLSYMKILYNICPYFKFGYMAANGAIAEALRSEDNIHIIDFQIAQGTQWITLIQALAARPGGPPHVRITGIDDPVSEYARGEGLDIVGNMLKSMSKEFNIPLEFTPLPVYATQVTKEMLEIRPGEA…
AsGRAS29	Pepsico2_Contig10379.mrna1	CDS Protein	MDLHQLLKYRLTGANVLYQIPTESNLANSSWPTNPLKLEFSNSPYTPLSTQLECDNLSALSNTPDNQSSTETISAQPISPLEAESSYIKAGSHLRENIQVRPDPLYATSRHNMQQTLRDIETVLMAPDADDATTSTKHDFEETKPAQLMRQRSRTWSHESRQPLPGAVRPQFASGGYPTAGYEFRPVKRQRELREDPQLIVKHLLTRCAEALSEDRTEEFLKLVQDARGTVSINGEPIQRLGAYLLEGLVARHGNSGTNIYRALKCREPESTELLSYMKILYNICPYFKFGYMAANGAIAEALRSEDNIHIIDFQIAQGTQWITLIQALAARPGGPPHVRITGIDDPVSEYARGEGLDIVGNMLKSMSKEFNIPLEFTPLPVYATQVTKEMLEIRPGEA…
AsGRAS30	Pepsico1_Contig28179.mrna1	CDS Protein	MEPGGPWRDPRQGYLYGLGSPMQMPPQQCQDPAAVGGVLKRSLGEIERWQQQRQVAMQQELYLRAVRQRTAATSPLASVDVAALLGGGGGGLSQQPLIFSGSSLAGGGLAAPSSTLSSLTTASRAAMPLIQQHVHRQAHFVPPSVQAQPHAAFGVARTPQAPSGGSELSILQELEKQLLGDDEEAEPAMSGTGSTLTSSEWEDTIQKLNSITAAAAAAPSPPPSFPAVATPNSNYNAGMTRSPSNSSTSTASSSASCSPPISVTTSRQLLSEAAVAIADGNLEAAAAHLATLKRAVNPRGDAEHRLVAMMVAALSSRIAPSASASSQQLADLCGTEHRTGCQFLHDISPCFRLALDAANIAVIDAVAGHRNIHLVDFDISGPQHAALIQSLADRRVPGT…
