# Supplementary material for: Genome-wide identification and characterization of abiotic stress responsive GRAS family genes in oat (Avena sativa)
Source: PeerJ. 2023 May 9;11:e15370. doi: 10.7717/peerj.15370 (PMC10178225; doi:10.7717/peerj.15370)
Supplement: Supplemental Information 3 [file peerj-11-15370-s003.xlsx]

## Sheet: Sheet1
Table S3 Corresponding names of 32 AtGRAS genes in Arabidopsis
Gene Name	Gene ID	GRAS subfamily
AtGRAS1	AT1G07520.1	LISCL
AtGRAS2	AT1G07530.1	LISCL
AtGRAS3	AT1G14920.1	DELLA
AtGRAS4	AT1G21450.1	PAT1
AtGRAS5	AT1G50420.1	SCL3
AtGRAS6	AT1G50600.1	PAT1
AtGRAS7	AT1G55580.1	LAS
AtGRAS8	AT1G63100.1	LAS
AtGRAS9	AT1G66350.1	DELLA
AtGRAS10	AT2G01570.1	DELLA
AtGRAS11	AT2G04890.1	PAT1
AtGRAS12	AT2G29060.1	LISCL
AtGRAS13	AT2G37650.1	LISCL
AtGRAS14	AT2G45160.1	HAM
AtGRAS15	AT3G03450.1	DELLA
AtGRAS16	AT3G13840.1	SHR
AtGRAS17	AT3G46600.1	LISCL
AtGRAS18	AT3G49950.1	SHR
AtGRAS19	AT3G50650.1	SCL4/7
AtGRAS20	AT3G54220.1	SCR
AtGRAS21	AT3G60630.1	HAM
AtGRAS22	AT4G00150.1	HAM
AtGRAS23	AT4G08250.1	HAM
AtGRAS24	AT4G17230.1	PAT1
AtGRAS25	AT4G36710.1	HAM
AtGRAS26	AT4G37650.1	SHR
AtGRAS27	AT5G17490.1	DELLA
AtGRAS28	AT5G41920.1	SCR
AtGRAS29	AT5G48150.1	PAT1
AtGRAS30	AT5G52510.1	PAT1
AtGRAS31	AT5G59450.1	LISCL
AtGRAS32	AT5G66770.1	SCL4/7
