# Supplementary material for: Genome-wide identification and characterization of abiotic stress responsive GRAS family genes in oat (Avena sativa)
Source: PeerJ. 2023 May 9;11:e15370. doi: 10.7717/peerj.15370 (PMC10178225; doi:10.7717/peerj.15370)
Supplement: Supplemental Information 4 [file peerj-11-15370-s004.xlsx]

## Sheet: Sheet1
Table S4 Gene ID of GRAS gene family members from four model plants: Arabidopsis thaliana, Oryza sativa, Zea mays and Avena sativa.
Arabidopsis thaliana	Oryza sativa	Zea mays	Avena sativa
AT1G07520.1	LOC_Os01g45860	Zm00001eb399000_T001	Pepsico1_Contig29889.mrna1
AT1G07530.1	LOC_Os01g62460	Zm00001eb268460_T001	Pepsico2_Contig16967.mrna1
AT1G14920.1	LOC_Os01g65900	Zm00001eb301410_T001	Pepsico2_Contig1709.mrna2
AT1G21450.1	LOC_Os01g67650	Zm00001eb164500_T001	Pepsico1_Contig26725.mrna2
AT1G50420.1	LOC_Os01g67670	Zm00001eb164480_T001	Pepsico1_Contig13965.mrna2
AT1G50600.1	LOC_Os01g71970	Zm00001eb164480_T002	Pepsico1_Contig30502.mrna2
AT1G55580.1	LOC_Os02g10360	Zm00001eb011560_T001	Pepsico1_Contig18352.mrna2
AT1G63100.1	LOC_Os02g21685	Zm00001eb202270_T001	Pepsico1_Contig25100.mrna1
AT1G66350.1	LOC_Os02g44360	Zm00001eb055700_T001	Pepsico2_Contig4966.mrna2
AT2G01570.1	LOC_Os02g44370	Zm00001eb325750_T001	Pepsico2_Contig7359.mrna1
AT2G04890.1	LOC_Os02g45760	Zm00001eb325750_T003	Pepsico1_Contig19030.mrna1
AT2G29060.1	LOC_Os03g09280	Zm00001eb049620_T001	Pepsico1_Contig14278.mrna1
AT2G37650.1	LOC_Os03g15680	Zm00001eb325750_T002	Pepsico1_Contig14835.mrna1
AT2G45160.1	LOC_Os03g29480	Zm00001eb215870_T001	Pepsico1_Contig27727.mrna1
AT3G03450.1	LOC_Os03g31880	Zm00001eb196430_T001	Pepsico1_Contig30502.mrna1
AT3G13840.1	LOC_Os03g37900	Zm00001eb133730_T001	Pepsico2_Contig7359.mrna2
AT3G46600.1	LOC_Os03g40080	Zm00001eb019640_T001	Pepsico1_Contig18352.mrna1
AT3G49950.1	LOC_Os03g48450	Zm00001eb158520_T001	Pepsico2_Contig16943.mrna3
AT3G50650.1	LOC_Os03g49990	Zm00001eb266920_T001	Pepsico2_Contig5101.mrna1
AT3G54220.1	LOC_Os03g51330	Zm00001eb195650_T001	Pepsico2_Contig1709.mrna1
AT3G60630.1	LOC_Os04g35250	Zm00001eb308090_T001	Pepsico1_Contig29889.mrna2
AT4G00150.1	LOC_Os04g37440	Zm00001eb136350_T001	Pepsico1_Contig17925.mrna1
AT4G08250.1	LOC_Os04g46860	Zm00001eb401210_T001	Pepsico2_Contig10379.mrna3
AT4G17230.1	LOC_Os04g49110	Zm00001eb136150_T001	Pepsico1_Contig36247.mrna1
AT4G36710.1	LOC_Os04g50060	Zm00001eb165340_T001	Pepsico1_Contig17438.mrna1
AT4G37650.1	LOC_Os05g31380	Zm00001eb108090_T001	Pepsico2_Contig1385.mrna1
AT5G17490.1	LOC_Os05g31420	Zm00001eb379340_T001	Pepsico2_Contig8490.mrna1
AT5G41920.1	LOC_Os05g40710	Zm00001eb165340_T002	Pepsico2_Contig1385.mrna2
AT5G48150.1	LOC_Os05g42130	Zm00001eb378590_T001	Pepsico2_Contig10379.mrna1
AT5G52510.1	LOC_Os05g49930	Zm00001eb054480_T001	Pepsico1_Contig28179.mrna1
AT5G59450.1	LOC_Os06g01620	Zm00001eb378590_T002
AT5G66770.1	LOC_Os06g03710	Zm00001eb054480_T002
	LOC_Os06g10900	Zm00001eb405080_T001
	LOC_Os06g40780	Zm00001eb397720_T001
	LOC_Os07g16330	Zm00001eb285410_T001
	LOC_Os07g36170	Zm00001eb291930_T001
	LOC_Os07g38030	Zm00001eb397720_T002
	LOC_Os07g39470	Zm00001eb000470_T001
	LOC_Os07g39820	Zm00001eb108250_T001
	LOC_Os07g40020	Zm00001eb108250_T002
	LOC_Os10g22430	Zm00001eb355870_T001
	LOC_Os10g40390	Zm00001eb170110_T001
	LOC_Os11g03110	Zm00001eb164530_T001
	LOC_Os11g04400	Zm00001eb164530_T002
	LOC_Os11g04570	Zm00001eb139470_T001
	LOC_Os11g04590	Zm00001eb392980_T001
	LOC_Os11g06180	Zm00001eb062760_T001
	LOC_Os11g11600	Zm00001eb301400_T001
	LOC_Os11g31100	Zm00001eb148290_T002
	LOC_Os11g47870	Zm00001eb148290_T001
	LOC_Os11g47890	Zm00001eb164350_T001
	LOC_Os11g47900	Zm00001eb236120_T001
	LOC_Os11g47910	Zm00001eb405090_T001
	LOC_Os11g47920	Zm00001eb164470_T001
	LOC_Os12g02870	Zm00001eb187310_T001
	LOC_Os12g04200	Zm00001eb388460_T001
	LOC_Os12g04370	Zm00001eb049880_T001
	LOC_Os12g04380	Zm00001eb027720_T001
	LOC_Os12g06540	Zm00001eb027720_T002
	LOC_Os12g38490	Zm00001eb196420_T001
		Zm00001eb355860_T001
		Zm00001eb136140_T001
		Zm00001eb112130_T001
		Zm00001eb093670_T002
		Zm00001eb093670_T001
		Zm00001eb067930_T001
		Zm00001eb363140_T001
		Zm00001eb012280_T001
		Zm00001eb266930_T001
		Zm00001eb266930_T002
		Zm00001eb324600_T001
		Zm00001eb073130_T001
		Zm00001eb115950_T001
		Zm00001eb398990_T001
		Zm00001eb082700_T001
		Zm00001eb107910_T002
		Zm00001eb107910_T001
		Zm00001eb141310_T001
		Zm00001eb326210_T001
		Zm00001eb216610_T001
		Zm00001eb249840_T001
		Zm00001eb428430_T001
		Zm00001eb249840_T002
		Zm00001eb106490_T001
		Zm00001eb081760_T001
		Zm00001eb405110_T001
		Zm00001eb164490_T001
		Zm00001eb074460_T001
		Zm00001eb186770_T002
		Zm00001eb327300_T001
		Zm00001eb326020_T001
		Zm00001eb186770_T001
		Zm00001eb020850_T001
		Zm00001eb186770_T003
		Zm00001eb429450_T001
		Zm00001eb326550_T001
		Zm00001eb029390_T001
		Zm00001eb344400_T001
		Zm00001eb002990_T001
		Zm00001eb291030_T001
		Zm00001eb288400_T002
		Zm00001eb067940_T001
		Zm00001eb288400_T001
		Zm00001eb023010_T001
		Zm00001eb422620_T001
