# Supplementary material for: Genome-wide identification and characterization of abiotic stress responsive GRAS family genes in oat (Avena sativa)
Source: PeerJ. 2023 May 9;11:e15370. doi: 10.7717/peerj.15370 (PMC10178225; doi:10.7717/peerj.15370)
Supplement: Supplemental Information 5 [file peerj-11-15370-s005.xlsx]

## Sheet: As.At
Table S5 One-to-one orthologous relationships between the GRAS gene members in Avena Sativa and Arabidopsis thaliana
AsGRAS Gene Name	AsGRAS Gene ID	AtGRAS Gene ID	Ka	Ks	Ka/Ks	Selection Pressure
AsGRAS01	Pepsico1_Contig29889.mrna1	AT3G49950.1	0.939337	2.26152	0.415357	Purifying selection
AsGRAS01	Pepsico1_Contig29889.mrna1	AT4G00150.1	0.528961	1.99021	0.265782	Purifying selection
AsGRAS02	Pepsico2_Contig16967.mrna1	AT3G49950.1	0.838898	1.64965	0.508531	Purifying selection
AsGRAS02	Pepsico2_Contig16967.mrna1	AT4G00150.1	0.785638	1.61259	0.48719	Purifying selection
AsGRAS02	Pepsico2_Contig16967.mrna1	AT5G17490.1	0.562006	2.12005	0.265091	Purifying selection
AsGRAS03	Pepsico2_Contig1709.mrna2	AT1G07520.1	0.77531	2.80714	0.276192	Purifying selection
AsGRAS03	Pepsico2_Contig1709.mrna2	AT2G37650.1	0.83258	2.84078	0.293082	Purifying selection
AsGRAS03	Pepsico2_Contig1709.mrna2	AT3G13840.1	0.876725	4.10266	0.213697	Purifying selection
AsGRAS03	Pepsico2_Contig1709.mrna2	AT3G46600.1	0.832893	3.1215	0.266824	Purifying selection
AsGRAS04	Pepsico1_Contig26725.mrna2	AT3G49950.1	0.939337	2.26152	0.415357	Purifying selection
AsGRAS05	Pepsico1_Contig26725.mrna2	AT4G00150.1	0.513158	1.9266	0.266354	Purifying selection
AsGRAS05	Pepsico1_Contig13965.mrna2	AT3G49950.1	0.939337	2.26152	0.415357	Purifying selection
AsGRAS05	Pepsico1_Contig13965.mrna2	AT4G00150.1	0.513158	1.9266	0.266354	Purifying selection
AsGRAS06	Pepsico1_Contig30502.mrna2	AT1G07520.1	0.77531	2.80714	0.276192	Purifying selection
AsGRAS06	Pepsico1_Contig30502.mrna2	AT2G37650.1	0.83258	2.84078	0.293082	Purifying selection
AsGRAS06	Pepsico1_Contig30502.mrna2	AT3G13840.1	0.876725	4.10266	0.213697	Purifying selection
AsGRAS06	Pepsico1_Contig30502.mrna2	AT3G46600.1	0.832893	3.1215	0.266824	Purifying selection
AsGRAS08	Pepsico1_Contig25100.mrna1	AT3G49950.1	0.939337	2.26152	0.415357	Purifying selection
AsGRAS08	Pepsico1_Contig25100.mrna1	AT4G00150.1	0.528961	1.99021	0.265782	Purifying selection
AsGRAS09	Pepsico2_Contig4966.mrna2	AT1G14920.1	0.722525	2.73807	0.263882	Purifying selection
AsGRAS09	Pepsico2_Contig4966.mrna2	AT1G50420.1	1.0559	3.3855	0.311889	Purifying selection
AsGRAS09	Pepsico2_Contig4966.mrna2	AT1G55580.1	1.04621	2.39005	0.437736	Purifying selection
AsGRAS09	Pepsico2_Contig4966.mrna2	AT3G49950.1	1.07827	1.81406	0.594397	Purifying selection
AsGRAS09	Pepsico2_Contig4966.mrna2	AT3G60630.1	0.917745	3.29017	0.278936	Purifying selection
AsGRAS09	Pepsico2_Contig4966.mrna2	AT4G00150.1	0.823959	4.09585	0.201169	Purifying selection
AsGRAS09	Pepsico2_Contig4966.mrna2	AT4G37650.1	0.883591	2.16916	0.407342	Purifying selection
AsGRAS09	Pepsico2_Contig4966.mrna2	AT5G17490.1	0.715377	1.99739	0.358156	Purifying selection
AsGRAS11	Pepsico1_Contig19030.mrna1	AT3G49950.1	0.939337	2.26152	0.415357	Purifying selection
AsGRAS11	Pepsico1_Contig19030.mrna1	AT4G00150.1	0.528961	1.99021	0.265782	Purifying selection
AsGRAS12	Pepsico1_Contig14278.mrna1	AT3G49950.1	0.939337	2.26152	0.415357	Purifying selection
AsGRAS12	Pepsico1_Contig14278.mrna1	AT4G00150.1	0.528961	1.99021	0.265782	Purifying selection
AsGRAS13	Pepsico1_Contig14835.mrna1	AT3G49950.1	0.939392	2.02371	0.464194	Purifying selection
AsGRAS13	Pepsico1_Contig14835.mrna1	AT4G00150.1	0.513121	1.59177	0.322359	Purifying selection
AsGRAS14	Pepsico1_Contig27727.mrna1	AT3G49950.1	0.939392	2.02371	0.464194	Purifying selection
AsGRAS14	Pepsico1_Contig27727.mrna1	AT4G00150.1	0.513121	1.59177	0.322359	Purifying selection
AsGRAS15	Pepsico1_Contig30502.mrna1	AT1G07520.1	0.777686	2.92595	0.265789	Purifying selection
AsGRAS15	Pepsico1_Contig30502.mrna1	AT2G37650.1	0.829013	2.75887	0.30049	Purifying selection
AsGRAS15	Pepsico1_Contig30502.mrna1	AT3G13840.1	0.879863	3.57486	0.246125	Purifying selection
AsGRAS15	Pepsico1_Contig30502.mrna1	AT3G46600.1	0.843883	2.67976	0.31491	Purifying selection
AsGRAS15	Pepsico1_Contig30502.mrna1	AT4G36710.1	0.885133	3.48144	0.254244	Purifying selection
AsGRAS16	Pepsico2_Contig7359.mrna2	AT3G49950.1	0.871921	1.92462	0.453035	Purifying selection
AsGRAS16	Pepsico2_Contig7359.mrna2	AT4G00150.1	0.502544	1.67575	0.299892	Purifying selection
AsGRAS16	Pepsico2_Contig7359.mrna2	AT5G17490.1	0.86359	5.36444	0.160984	Purifying selection
AsGRAS17	Pepsico1_Contig18352.mrna1	AT1G07520.1	0.777686	2.92595	0.265789	Purifying selection
AsGRAS17	Pepsico1_Contig18352.mrna1	AT2G37650.1	0.829013	2.75887	0.30049	Purifying selection
AsGRAS17	Pepsico1_Contig18352.mrna1	AT3G13840.1	0.879863	3.57486	0.246125	Purifying selection
AsGRAS17	Pepsico1_Contig18352.mrna1	AT3G46600.1	0.843883	2.67976	0.31491	Purifying selection
AsGRAS17	Pepsico1_Contig18352.mrna1	AT4G36710.1	0.885133	3.48144	0.254244	Purifying selection
AsGRAS17	Pepsico1_Contig18352.mrna2	AT1G07520.1	0.77531	2.80714	0.276192	Purifying selection
AsGRAS17	Pepsico1_Contig18352.mrna2	AT2G37650.1	0.83258	2.84078	0.293082	Purifying selection
AsGRAS17	Pepsico1_Contig18352.mrna2	AT3G13840.1	0.876725	4.10266	0.213697	Purifying selection
AsGRAS17	Pepsico1_Contig18352.mrna2	AT3G46600.1	0.832893	3.1215	0.266824	Purifying selection
AsGRAS18	Pepsico2_Contig16943.mrna3	AT1G07520.1	0.891205	4.41052	0.202063	Purifying selection
AsGRAS18	Pepsico2_Contig16943.mrna3	AT1G07530.1	0.792129	2.303	0.343956	Purifying selection
AsGRAS18	Pepsico2_Contig16943.mrna3	AT1G21450.1	0.538531	3.6411	0.147903	Purifying selection
AsGRAS18	Pepsico2_Contig16943.mrna3	AT1G63100.1	0.90034	4.52779	0.198848	Purifying selection
AsGRAS18	Pepsico2_Contig16943.mrna3	AT2G04890.1	0.312058	3.05769	0.102057	Purifying selection
AsGRAS18	Pepsico2_Contig16943.mrna3	AT2G29060.1	0.834979	2.8736	0.290569	Purifying selection
AsGRAS18	Pepsico2_Contig16943.mrna3	AT2G37650.1	0.848582	2.41884	0.350821	Purifying selection
AsGRAS18	Pepsico2_Contig16943.mrna3	AT3G46600.1	0.859028	3.08145	0.278774	Purifying selection
AsGRAS18	Pepsico2_Contig16943.mrna3	AT4G08250.1	0.884357	4.31565	0.204919	Purifying selection
AsGRAS19	Pepsico2_Contig5101.mrna1	AT1G07520.1	0.891205	4.41052	0.202063	Purifying selection
AsGRAS19	Pepsico2_Contig5101.mrna1	AT1G07530.1	0.792129	2.303	0.343956	Purifying selection
AsGRAS19	Pepsico2_Contig5101.mrna1	AT1G21450.1	0.538531	3.6411	0.147903	Purifying selection
AsGRAS19	Pepsico2_Contig5101.mrna1	AT1G63100.1	0.90034	4.52779	0.198848	Purifying selection
AsGRAS19	Pepsico2_Contig5101.mrna1	AT2G04890.1	0.312058	3.05769	0.102057	Purifying selection
AsGRAS19	Pepsico2_Contig5101.mrna1	AT2G29060.1	0.834979	2.8736	0.290569	Purifying selection
AsGRAS19	Pepsico2_Contig5101.mrna1	AT2G37650.1	0.848582	2.41884	0.350821	Purifying selection
AsGRAS19	Pepsico2_Contig5101.mrna1	AT3G46600.1	0.859028	3.08145	0.278774	Purifying selection
AsGRAS19	Pepsico2_Contig5101.mrna1	AT4G08250.1	0.884357	4.31565	0.204919	Purifying selection
AsGRAS20	Pepsico2_Contig1709.mrna1	AT1G07520.1	0.777686	2.92595	0.265789	Purifying selection
AsGRAS20	Pepsico2_Contig1709.mrna1	AT2G37650.1	0.829013	2.75887	0.30049	Purifying selection
AsGRAS20	Pepsico2_Contig1709.mrna1	AT3G13840.1	0.879863	3.57486	0.246125	Purifying selection
AsGRAS20	Pepsico2_Contig1709.mrna1	AT3G46600.1	0.843883	2.67976	0.31491	Purifying selection
AsGRAS20	Pepsico2_Contig1709.mrna1	AT4G36710.1	0.885133	3.48144	0.254244	Purifying selection
AsGRAS21	Pepsico1_Contig29889.mrna2	AT3G49950.1	0.871921	1.92462	0.453035	Purifying selection
AsGRAS21	Pepsico1_Contig29889.mrna2	AT4G00150.1	0.502544	1.67575	0.299892	Purifying selection
AsGRAS21	Pepsico1_Contig29889.mrna2	AT5G17490.1	0.86359	5.36444	0.160984	Purifying selection
AsGRAS22	Pepsico1_Contig17925.mrna1	AT1G07530.1	0.993263	3.69509	0.268806	Purifying selection
AsGRAS22	Pepsico1_Contig17925.mrna1	AT1G55580.1	0.862233	3.62261	0.238015	Purifying selection
AsGRAS22	Pepsico1_Contig17925.mrna1	AT2G04890.1	0.398592	2.75665	0.144593	Purifying selection
AsGRAS22	Pepsico1_Contig17925.mrna1	AT3G49950.1	0.921499	1.70795	0.539535	Purifying selection
AsGRAS22	Pepsico1_Contig17925.mrna1	AT4G00150.1	0.875476	2.41285	0.362839	Purifying selection
AsGRAS22	Pepsico1_Contig17925.mrna1	AT5G52510.1	0.902077	2.20772	0.408602	Purifying selection
AsGRAS23	Pepsico2_Contig10379.mrna3	AT1G14920.1	0.688904	3.58355	0.19224	Purifying selection
AsGRAS23	Pepsico2_Contig10379.mrna3	AT1G66350.1	0.676895	3.0664	0.220746	Purifying selection
AsGRAS23	Pepsico2_Contig10379.mrna3	AT2G29060.1	0.898033	2.96503	0.302874	Purifying selection
AsGRAS23	Pepsico2_Contig10379.mrna3	AT2G37650.1	0.889949	3.81105	0.233518	Purifying selection
AsGRAS23	Pepsico2_Contig10379.mrna3	AT4G36710.1	0.836499	3.11102	0.268883	Purifying selection
AsGRAS23	Pepsico2_Contig10379.mrna3	AT5G52510.1	0.797314	3.12535	0.255111	Purifying selection
AsGRAS23	Pepsico2_Contig10379.mrna3	AT5G59450.1	0.840417	3.17418	0.264766	Purifying selection
AsGRAS23	Pepsico2_Contig10379.mrna3	AT5G66770.1	0.761251	2.90323	0.262208	Purifying selection
AsGRAS24	Pepsico1_Contig36247.mrna1	AT1G21450.1	0.65576	2.62089	0.250205	Purifying selection
AsGRAS24	Pepsico1_Contig36247.mrna1	AT1G50420.1	0.930963	3.5214	0.264373	Purifying selection
AsGRAS24	Pepsico1_Contig36247.mrna1	AT1G50600.1	0.551401	3.69435	0.149255	Purifying selection
AsGRAS24	Pepsico1_Contig36247.mrna1	AT1G55580.1	1.1064	1.89579	0.583609	Purifying selection
AsGRAS24	Pepsico1_Contig36247.mrna1	AT1G66350.1	0.921029	3.73787	0.246405	Purifying selection
AsGRAS24	Pepsico1_Contig36247.mrna1	AT2G04890.1	0.563449	2.14579	0.262583	Purifying selection
AsGRAS24	Pepsico1_Contig36247.mrna1	AT2G37650.1	1.05579	2.77281	0.380765	Purifying selection
AsGRAS24	Pepsico1_Contig36247.mrna1	AT3G49950.1	1.05055	1.94927	0.538943	Purifying selection
AsGRAS24	Pepsico1_Contig36247.mrna1	AT4G17230.1	0.713553	3.65926	0.194999	Purifying selection
AsGRAS24	Pepsico1_Contig36247.mrna1	AT5G52510.1	0.971478	2.98576	0.32537	Purifying selection
AsGRAS25	Pepsico1_Contig17438.mrna1	AT3G49950.1	0.873978	3.20941	0.272317	Purifying selection
AsGRAS25	Pepsico1_Contig17438.mrna1	AT4G00150.1	0.822257	2.77455	0.296357	Purifying selection
AsGRAS27	Pepsico2_Contig8490.mrna1	AT3G49950.1	0.876346	2.0031	0.437495	Purifying selection
AsGRAS27	Pepsico2_Contig8490.mrna1	AT4G00150.1	0.85994	1.28777	0.667775	Purifying selection
AsGRAS27	Pepsico2_Contig8490.mrna1	AT4G17230.1	0.720663	3.36378	0.214242	Purifying selection
AsGRAS27	Pepsico2_Contig8490.mrna1	AT5G52510.1	0.989311	4.21986	0.234442	Purifying selection
AsGRAS27	Pepsico2_Contig7359.mrna1	AT3G49950.1	0.939337	2.26152	0.415357	Purifying selection
AsGRAS27	Pepsico2_Contig7359.mrna1	AT4G00150.1	0.528961	1.99021	0.265782	Purifying selection
AsGRAS28	Pepsico2_Contig1385.mrna2	AT1G14920.1	0.678328	4.4083	0.153875	Purifying selection
AsGRAS28	Pepsico2_Contig1385.mrna2	AT1G63100.1	0.770211	3.9205	0.196457	Purifying selection
AsGRAS28	Pepsico2_Contig1385.mrna2	AT2G29060.1	0.891433	2.87941	0.309588	Purifying selection
AsGRAS28	Pepsico2_Contig1385.mrna2	AT5G52510.1	0.788362	3.33058	0.236704	Purifying selection
AsGRAS28	Pepsico2_Contig1385.mrna2	AT5G59450.1	0.884255	3.51143	0.251822	Purifying selection
AsGRAS28	Pepsico2_Contig1385.mrna1	AT1G14920.1	0.688904	3.58355	0.19224	Purifying selection
AsGRAS28	Pepsico2_Contig1385.mrna1	AT1G66350.1	0.676895	3.0664	0.220746	Purifying selection
AsGRAS28	Pepsico2_Contig1385.mrna1	AT2G29060.1	0.898033	2.96503	0.302874	Purifying selection
AsGRAS28	Pepsico2_Contig1385.mrna1	AT2G37650.1	0.889949	3.81105	0.233518	Purifying selection
AsGRAS28	Pepsico2_Contig1385.mrna1	AT4G36710.1	0.836499	3.11102	0.268883	Purifying selection
AsGRAS28	Pepsico2_Contig1385.mrna1	AT5G52510.1	0.797314	3.12535	0.255111	Purifying selection
AsGRAS28	Pepsico2_Contig1385.mrna1	AT5G59450.1	0.840417	3.17418	0.264766	Purifying selection
AsGRAS28	Pepsico2_Contig1385.mrna1	AT5G66770.1	0.761251	2.90323	0.262208	Purifying selection
AsGRAS29	Pepsico2_Contig10379.mrna1	AT1G14920.1	0.678328	4.4083	0.153875	Purifying selection
AsGRAS29	Pepsico2_Contig10379.mrna1	AT1G63100.1	0.770211	3.9205	0.196457	Purifying selection
AsGRAS29	Pepsico2_Contig10379.mrna1	AT2G29060.1	0.891433	2.87941	0.309588	Purifying selection
AsGRAS29	Pepsico2_Contig10379.mrna1	AT5G52510.1	0.788362	3.33058	0.236704	Purifying selection
AsGRAS29	Pepsico2_Contig10379.mrna1	AT5G59450.1	0.884255	3.51143	0.251822	Purifying selection
AsGRAS30	Pepsico1_Contig28179.mrna1	AT3G49950.1	0.858339	2.6553	0.323256	Purifying selection
AsGRAS30	Pepsico1_Contig28179.mrna1	AT4G00150.1	0.842887	2.14869	0.392279	Purifying selection
AsGRAS30	Pepsico1_Contig28179.mrna1	AT4G37650.1	0.861026	4.18526	0.205728	Purifying selection

## Sheet: As.Os
Table S5 One-to-one orthologous relationships between the GRAS gene members in Avena Sativa and Oryza sativa
AsGRAS Gene Name	AsGRAS Gene ID	OsGRAS Gene ID	Ka	Ks	Ka/Ks	Selection Pressure
AsGRAS01	Pepsico1_Contig29889.mrna1	Os06t0211500-00	0.843424	1.24686	0.676441	Purifying selection
AsGRAS01	Pepsico1_Contig29889.mrna1	Os03t0103400-01	0.270274	0.711856	0.379675	Purifying selection
AsGRAS01	Pepsico1_Contig29889.mrna1	Os06t0610350-01	0.730707	0.812873	0.898919	Purifying selection
AsGRAS01	Pepsico1_Contig29889.mrna1	Os01t0948200-00	0.813816	0.94956	0.857045	Purifying selection
AsGRAS01	Pepsico1_Contig29889.mrna1	Os11t0705200-01	0.87837	0.948724	0.925844	Purifying selection
AsGRAS01	Pepsico1_Contig29889.mrna1	Os05t0378500-00	0.827972	0.887895	0.932511	Purifying selection
AsGRAS01	Pepsico1_Contig29889.mrna1	Os01t0646300-01	0.728163	0.89059	0.817618	Purifying selection
AsGRAS01	Pepsico1_Contig29889.mrna1	Os07t0589200-00	0.828997	0.790647	1.0485	Purifying selection
AsGRAS01	Pepsico1_Contig29889.mrna1	Os02t0662700-02	0.385255	1.84755	0.208522	Purifying selection
AsGRAS01	Pepsico1_Contig29889.mrna1	Os06t0127800-01	0.833923	0.832669	1.00151	Purifying selection
AsGRAS01	Pepsico1_Contig29889.mrna1	Os02t0662700-01	0.363861	1.52269	0.238959	Purifying selection
AsGRAS01	Pepsico1_Contig29889.mrna1	Os12t0573200-01	0.876809	1.27532	0.687522	Purifying selection
AsGRAS01	Pepsico1_Contig29889.mrna1	Os12t0162700-00	0.775112	2.2335	0.34704	Purifying selection
AsGRAS01	Pepsico1_Contig29889.mrna1	Os05t0574900-01	0.757936	0.753491	1.0059	Purifying selection
AsGRAS01	Pepsico1_Contig29889.mrna1	Os11t0139600-01	0.916919	1.21507	0.754624	Purifying selection
AsGRAS01	Pepsico1_Contig29889.mrna1	Os10t0551200-01	0.0758486	0.388268	0.195351	Purifying selection
AsGRAS01	Pepsico1_Contig29889.mrna1	Os03t0408600-01	0.841074	0.826717	1.01737	Purifying selection
AsGRAS01	Pepsico1_Contig29889.mrna1	Os11t0124300-01	0.795792	1.28984	0.61697	Purifying selection
AsGRAS01	Pepsico1_Contig29889.mrna1	Os07t0586900-01	0.896654	0.812214	1.10396	Purifying selection
AsGRAS01	Pepsico1_Contig29889.mrna1	Os12t0138166-00	0.94925	2.52735	0.375591	Purifying selection
AsGRAS01	Pepsico1_Contig29889.mrna1	Os02t0663100-01	0.375365	1.62919	0.2304	Purifying selection
AsGRAS01	Pepsico1_Contig29889.mrna1	Os03t0723000-01	0.769612	1.27636	0.602976	Purifying selection
AsGRAS01	Pepsico1_Contig29889.mrna1	Os05t0485400-00	0.81673	1.07313	0.761076	Purifying selection
AsGRAS01	Pepsico1_Contig29889.mrna1	Os12t0138200-00	0.865418	1.08493	0.797669	Purifying selection
AsGRAS01	Pepsico1_Contig29889.mrna1	Os05t0378200-00	0.817108	0.754506	1.08297	Purifying selection
AsGRAS01	Pepsico1_Contig29889.mrna1	Os11t0706200-00	0.876951	1.64364	0.53354	Purifying selection
AsGRAS01	Pepsico1_Contig29889.mrna1	Os03t0707600-01	0.79516	1.04425	0.761466	Purifying selection
AsGRAS01	Pepsico1_Contig29889.mrna1	Os02t0681900-01	0.848701	1.2903	0.657756	Purifying selection
AsGRAS01	Pepsico1_Contig29889.mrna1	Os11t0141700-00	0.874629	0.900649	0.97111	Purifying selection
AsGRAS01	Pepsico1_Contig29889.mrna1	Os03t0723000-02	0.769612	1.27636	0.602976	Purifying selection
AsGRAS01	Pepsico1_Contig29889.mrna1	Os11t0500050-00	0.99718	1.0092	0.988094	Purifying selection
AsGRAS01	Pepsico1_Contig29889.mrna1	Os03t0433200-01	0.853422	0.839172	1.01698	Purifying selection
AsGRAS01	Pepsico1_Contig29889.mrna1	Os04t0580300-01	0.885554	1.12634	0.786225	Purifying selection
AsGRAS01	Pepsico1_Contig29889.mrna1	Os04t0555000-01	0.398477	1.71393	0.232493	Purifying selection
AsGRAS01	Pepsico1_Contig29889.mrna1	Os05t0500600-01	1.01513	0.925346	1.09703	Purifying selection
AsGRAS01	Pepsico1_Contig29889.mrna1	Os11t0141500-00	0.865819	0.878599	0.985454	Purifying selection
AsGRAS01	Pepsico1_Contig29889.mrna1	Os07t0583600-01	0.807594	1.5253	0.529465	Purifying selection
AsGRAS01	Pepsico1_Contig29889.mrna1	Os12t0122000-01	0.770906	1.27585	0.604228	Purifying selection
AsGRAS01	Pepsico1_Contig29889.mrna1	Os07t0583600-02	0.807594	1.5253	0.529465	Purifying selection
AsGRAS01	Pepsico1_Contig29889.mrna1	Os07t0583600-03	0.848802	1.35206	0.627784	Purifying selection
AsGRAS01	Pepsico1_Contig29889.mrna1	Os03t0263300-01	0.868069	0.792664	1.09513	Purifying selection
AsGRAS01	Pepsico1_Contig29889.mrna1	Os06t0105350-01	0.445575	0.776085	0.574132	Purifying selection
AsGRAS01	Pepsico1_Contig29889.mrna1	Os04t0432100-00	0.799595	1.06539	0.750516	Purifying selection
AsGRAS01	Pepsico1_Contig29889.mrna1	Os07t0567700-01	0.721715	1.0106	0.714144	Purifying selection
AsGRAS01	Pepsico1_Contig29889.mrna1	Os07t0567700-02	0.719571	0.900997	0.798639	Purifying selection
AsGRAS01	Pepsico1_Contig29889.mrna1	Os12t0138100-00	0.845871	0.864427	0.978533	Purifying selection
AsGRAS01	Pepsico1_Contig29889.mrna1	Os07t0567700-03	0.700758	0.799606	0.876378	Purifying selection
AsGRAS01	Pepsico1_Contig29889.mrna1	Os11t0705900-01	0.953046	1.10651	0.861312	Purifying selection
AsGRAS01	Pepsico1_Contig29889.mrna1	Os02t0197300-00	0.73434	0.728719	1.00771	Purifying selection
AsGRAS01	Pepsico1_Contig29889.mrna1	Os07t0545800-01	0.961318	3.07236	0.312892	Purifying selection
AsGRAS02	Pepsico2_Contig16967.mrna1	Os06t0211500-00	0.609478	0.746059	0.81693	Purifying selection
AsGRAS02	Pepsico2_Contig16967.mrna1	Os03t0103400-01	0.790617	0.699731	1.12989	Purifying selection
AsGRAS02	Pepsico2_Contig16967.mrna1	Os06t0610350-01	0.66573	0.625794	1.06382	Purifying selection
AsGRAS02	Pepsico2_Contig16967.mrna1	Os01t0948200-00	0.620988	0.721088	0.861182	Purifying selection
AsGRAS02	Pepsico2_Contig16967.mrna1	Os11t0705200-01	0.918232	0.878369	1.04538	Purifying selection
AsGRAS02	Pepsico2_Contig16967.mrna1	Os05t0378500-00	0.700805	0.738616	0.948809	Purifying selection
AsGRAS02	Pepsico2_Contig16967.mrna1	Os01t0646300-01	0.327847	0.78657	0.416806	Purifying selection
AsGRAS02	Pepsico2_Contig16967.mrna1	Os07t0589200-00	0.743633	0.669829	1.11018	Purifying selection
AsGRAS02	Pepsico2_Contig16967.mrna1	Os02t0662700-02	0.831837	1.79307	0.463918	Purifying selection
AsGRAS02	Pepsico2_Contig16967.mrna1	Os06t0127800-01	0.683103	0.675992	1.01052	Purifying selection
AsGRAS02	Pepsico2_Contig16967.mrna1	Os02t0662700-01	0.831837	1.79307	0.463918	Purifying selection
AsGRAS02	Pepsico2_Contig16967.mrna1	Os12t0573200-01	0.963782	1.69416	0.568884	Purifying selection
AsGRAS02	Pepsico2_Contig16967.mrna1	Os12t0162700-00	0.770302	1.54619	0.498192	Purifying selection
AsGRAS02	Pepsico2_Contig16967.mrna1	Os05t0574900-01	0.319018	0.494488	0.645147	Purifying selection
AsGRAS02	Pepsico2_Contig16967.mrna1	Os11t0139600-01	0.770238	1.47322	0.522827	Purifying selection
AsGRAS02	Pepsico2_Contig16967.mrna1	Os10t0551200-01	0.782849	0.670154	1.16816	Purifying selection
AsGRAS02	Pepsico2_Contig16967.mrna1	Os03t0408600-01	0.773117	0.837137	0.923525	Purifying selection
AsGRAS02	Pepsico2_Contig16967.mrna1	Os11t0124300-01	0.64168	1.09238	0.587413	Purifying selection
AsGRAS02	Pepsico2_Contig16967.mrna1	Os07t0586900-01	0.794205	0.781909	1.01573	Purifying selection
AsGRAS02	Pepsico2_Contig16967.mrna1	Os02t0663100-01	0.823433	1.65769	0.496736	Purifying selection
AsGRAS02	Pepsico2_Contig16967.mrna1	Os03t0723000-01	0.651789	1.12202	0.580907	Purifying selection
AsGRAS02	Pepsico2_Contig16967.mrna1	Os05t0485400-00	0.653204	0.832742	0.784401	Purifying selection
AsGRAS02	Pepsico2_Contig16967.mrna1	Os12t0138200-00	0.710419	1.13305	0.626996	Purifying selection
AsGRAS02	Pepsico2_Contig16967.mrna1	Os05t0378200-00	0.685268	0.727665	0.941736	Purifying selection
AsGRAS02	Pepsico2_Contig16967.mrna1	Os11t0706200-00	0.881601	1.84735	0.477225	Purifying selection
AsGRAS02	Pepsico2_Contig16967.mrna1	Os03t0707600-01	0.390899	0.806596	0.484628	Purifying selection
AsGRAS02	Pepsico2_Contig16967.mrna1	Os02t0681900-01	0.765387	0.766343	0.998752	Purifying selection
AsGRAS02	Pepsico2_Contig16967.mrna1	Os11t0141700-00	0.723597	1.07553	0.672781	Purifying selection
AsGRAS02	Pepsico2_Contig16967.mrna1	Os03t0723000-02	0.651789	1.12202	0.580907	Purifying selection
AsGRAS02	Pepsico2_Contig16967.mrna1	Os11t0500050-00	0.636503	1.24995	0.509224	Purifying selection
AsGRAS02	Pepsico2_Contig16967.mrna1	Os03t0433200-01	0.780029	0.879255	0.887147	Purifying selection
AsGRAS02	Pepsico2_Contig16967.mrna1	Os04t0580300-01	0.782083	0.91367	0.85598	Purifying selection
AsGRAS02	Pepsico2_Contig16967.mrna1	Os04t0555000-01	0.857382	2.01822	0.424821	Purifying selection
AsGRAS02	Pepsico2_Contig16967.mrna1	Os05t0500600-01	0.740338	0.691867	1.07006	Purifying selection
AsGRAS02	Pepsico2_Contig16967.mrna1	Os11t0141500-00	0.681225	0.779829	0.873557	Purifying selection
AsGRAS02	Pepsico2_Contig16967.mrna1	Os07t0583600-01	0.719811	1.29621	0.555318	Purifying selection
AsGRAS02	Pepsico2_Contig16967.mrna1	Os12t0122000-01	0.662513	1.14291	0.57967	Purifying selection
AsGRAS02	Pepsico2_Contig16967.mrna1	Os07t0583600-02	0.719811	1.29621	0.555318	Purifying selection
AsGRAS02	Pepsico2_Contig16967.mrna1	Os07t0583600-03	0.652428	1.08175	0.603123	Purifying selection
AsGRAS02	Pepsico2_Contig16967.mrna1	Os03t0263300-01	0.635885	0.602026	1.05624	Purifying selection
AsGRAS02	Pepsico2_Contig16967.mrna1	Os06t0105350-01	0.779739	0.927525	0.840666	Purifying selection
AsGRAS02	Pepsico2_Contig16967.mrna1	Os04t0432100-00	0.673431	0.725293	0.928496	Purifying selection
AsGRAS02	Pepsico2_Contig16967.mrna1	Os07t0567700-01	0.635357	0.924515	0.687232	Purifying selection
AsGRAS02	Pepsico2_Contig16967.mrna1	Os07t0567700-02	0.602053	0.674028	0.893215	Purifying selection
AsGRAS02	Pepsico2_Contig16967.mrna1	Os12t0138100-00	0.68866	0.773592	0.890211	Purifying selection
AsGRAS02	Pepsico2_Contig16967.mrna1	Os01t0842200-01	0.943856	2.57485	0.366567	Purifying selection
AsGRAS02	Pepsico2_Contig16967.mrna1	Os07t0567700-03	0.712644	1.03972	0.685419	Purifying selection
AsGRAS02	Pepsico2_Contig16967.mrna1	Os11t0705900-01	0.852183	0.993795	0.857504	Purifying selection
AsGRAS02	Pepsico2_Contig16967.mrna1	Os02t0197300-00	0.69049	0.758827	0.909944	Purifying selection
AsGRAS02	Pepsico2_Contig16967.mrna1	Os01t0842200-02	0.943856	2.57485	0.366567	Purifying selection
AsGRAS02	Pepsico2_Contig16967.mrna1	Os07t0545800-01	0.804836	2.43592	0.330403	Purifying selection
AsGRAS03	Pepsico2_Contig1709.mrna2	Os01t0881500-02	0.538918	2.91106	0.185128	Purifying selection
AsGRAS03	Pepsico2_Contig1709.mrna2	Os01t0881500-01	0.538918	2.91106	0.185128	Purifying selection
AsGRAS03	Pepsico2_Contig1709.mrna2	Os02t0662700-02	0.811686	3.15937	0.256913	Purifying selection
AsGRAS03	Pepsico2_Contig1709.mrna2	Os02t0662700-01	0.811686	3.15937	0.256913	Purifying selection
AsGRAS03	Pepsico2_Contig1709.mrna2	Os12t0573200-01	0.797535	4.79752	0.166239	Purifying selection
AsGRAS03	Pepsico2_Contig1709.mrna2	Os11t0141550-01	0.788501	3.58686	0.219831	Purifying selection
AsGRAS03	Pepsico2_Contig1709.mrna2	Os12t0138166-00	0.823162	5.27579	0.156026	Purifying selection
AsGRAS03	Pepsico2_Contig1709.mrna2	Os11t0160550-00	0.860706	2.6803	0.321123	Purifying selection
AsGRAS03	Pepsico2_Contig1709.mrna2	Os10t0369600-01	0.153473	0.732529	0.209511	Purifying selection
AsGRAS03	Pepsico2_Contig1709.mrna2	Os04t0555000-01	0.858095	3.10554	0.276311	Purifying selection
AsGRAS03	Pepsico2_Contig1709.mrna2	Os03t0193000-01	0.162141	0.807292	0.200845	Purifying selection
AsGRAS03	Pepsico2_Contig1709.mrna2	Os01t0842200-01	0.767935	2.83968	0.27043	Purifying selection
AsGRAS03	Pepsico2_Contig1709.mrna2	Os01t0842200-02	0.767935	2.83968	0.27043	Purifying selection
AsGRAS04	Pepsico1_Contig26725.mrna2	Os06t0211500-00	0.843424	1.24686	0.676441	Purifying selection
AsGRAS04	Pepsico1_Contig26725.mrna2	Os03t0103400-01	0.270274	0.711856	0.379675	Purifying selection
AsGRAS04	Pepsico1_Contig26725.mrna2	Os06t0610350-01	0.730707	0.812873	0.898919	Purifying selection
AsGRAS04	Pepsico1_Contig26725.mrna2	Os01t0948200-00	0.813816	0.94956	0.857045	Purifying selection
AsGRAS04	Pepsico1_Contig26725.mrna2	Os11t0705200-01	0.848436	1.01429	0.836486	Purifying selection
AsGRAS04	Pepsico1_Contig26725.mrna2	Os05t0378500-00	0.827972	0.887895	0.932511	Purifying selection
AsGRAS04	Pepsico1_Contig26725.mrna2	Os01t0646300-01	0.728163	0.89059	0.817618	Purifying selection
AsGRAS04	Pepsico1_Contig26725.mrna2	Os07t0589200-00	0.828997	0.790647	1.0485	Purifying selection
AsGRAS04	Pepsico1_Contig26725.mrna2	Os02t0662700-02	0.385255	1.84755	0.208522	Purifying selection
AsGRAS04	Pepsico1_Contig26725.mrna2	Os06t0127800-01	0.833526	0.826446	1.00857	Purifying selection
AsGRAS04	Pepsico1_Contig26725.mrna2	Os02t0662700-01	0.365111	1.52269	0.23978	Purifying selection
AsGRAS04	Pepsico1_Contig26725.mrna2	Os12t0573200-01	0.884711	1.24825	0.708763	Purifying selection
AsGRAS04	Pepsico1_Contig26725.mrna2	Os12t0162700-00	0.775112	2.2335	0.34704	Purifying selection
AsGRAS04	Pepsico1_Contig26725.mrna2	Os05t0574900-01	0.757936	0.753491	1.0059	Purifying selection
AsGRAS04	Pepsico1_Contig26725.mrna2	Os11t0139600-01	0.916919	1.21507	0.754624	Purifying selection
AsGRAS04	Pepsico1_Contig26725.mrna2	Os10t0551200-01	0.0758486	0.388268	0.195351	Purifying selection
AsGRAS04	Pepsico1_Contig26725.mrna2	Os03t0408600-01	0.841074	0.826717	1.01737	Purifying selection
AsGRAS04	Pepsico1_Contig26725.mrna2	Os11t0124300-01	0.787268	1.27925	0.615413	Purifying selection
AsGRAS04	Pepsico1_Contig26725.mrna2	Os07t0586900-01	0.896654	0.812214	1.10396	Purifying selection
AsGRAS04	Pepsico1_Contig26725.mrna2	Os12t0138166-00	0.94925	2.52735	0.375591	Purifying selection
AsGRAS04	Pepsico1_Contig26725.mrna2	Os02t0663100-01	0.375365	1.62919	0.2304	Purifying selection
AsGRAS04	Pepsico1_Contig26725.mrna2	Os03t0723000-01	0.770809	1.26962	0.607116	Purifying selection
AsGRAS04	Pepsico1_Contig26725.mrna2	Os05t0485400-00	0.81673	1.07313	0.761076	Purifying selection
AsGRAS04	Pepsico1_Contig26725.mrna2	Os12t0138200-00	0.865418	1.08493	0.797669	Purifying selection
AsGRAS04	Pepsico1_Contig26725.mrna2	Os05t0378200-00	0.817108	0.754506	1.08297	Purifying selection
AsGRAS04	Pepsico1_Contig26725.mrna2	Os11t0706200-00	0.890021	1.66236	0.535398	Purifying selection
AsGRAS04	Pepsico1_Contig26725.mrna2	Os03t0707600-01	0.79516	1.04425	0.761466	Purifying selection
AsGRAS04	Pepsico1_Contig26725.mrna2	Os02t0681900-01	0.848701	1.2903	0.657756	Purifying selection
AsGRAS04	Pepsico1_Contig26725.mrna2	Os11t0141700-00	0.874629	0.900649	0.97111	Purifying selection
AsGRAS04	Pepsico1_Contig26725.mrna2	Os03t0723000-02	0.770809	1.26962	0.607116	Purifying selection
AsGRAS04	Pepsico1_Contig26725.mrna2	Os11t0500050-00	0.99718	1.0092	0.988094	Purifying selection
AsGRAS04	Pepsico1_Contig26725.mrna2	Os03t0433200-01	0.853422	0.839172	1.01698	Purifying selection
AsGRAS04	Pepsico1_Contig26725.mrna2	Os04t0580300-01	0.903507	1.04287	0.866364	Purifying selection
AsGRAS04	Pepsico1_Contig26725.mrna2	Os04t0555000-01	0.398477	1.71393	0.232493	Purifying selection
AsGRAS04	Pepsico1_Contig26725.mrna2	Os05t0500600-01	1.01513	0.925346	1.09703	Purifying selection
AsGRAS04	Pepsico1_Contig26725.mrna2	Os11t0141500-00	0.865819	0.878599	0.985454	Purifying selection
AsGRAS04	Pepsico1_Contig26725.mrna2	Os07t0583600-01	0.807594	1.5253	0.529465	Purifying selection
AsGRAS04	Pepsico1_Contig26725.mrna2	Os12t0122000-01	0.76252	1.26545	0.602569	Purifying selection
AsGRAS04	Pepsico1_Contig26725.mrna2	Os07t0583600-02	0.807594	1.5253	0.529465	Purifying selection
AsGRAS04	Pepsico1_Contig26725.mrna2	Os07t0583600-03	0.848802	1.35206	0.627784	Purifying selection
AsGRAS04	Pepsico1_Contig26725.mrna2	Os03t0263300-01	0.868069	0.792664	1.09513	Purifying selection
AsGRAS04	Pepsico1_Contig26725.mrna2	Os06t0105350-01	0.450495	0.775943	0.580577	Purifying selection
AsGRAS04	Pepsico1_Contig26725.mrna2	Os04t0432100-00	0.799595	1.06539	0.750516	Purifying selection
AsGRAS04	Pepsico1_Contig26725.mrna2	Os07t0567700-01	0.721715	1.0106	0.714144	Purifying selection
AsGRAS04	Pepsico1_Contig26725.mrna2	Os07t0567700-02	0.719571	0.900997	0.798639	Purifying selection
AsGRAS04	Pepsico1_Contig26725.mrna2	Os12t0138100-00	0.845871	0.864427	0.978533	Purifying selection
AsGRAS04	Pepsico1_Contig26725.mrna2	Os07t0567700-03	0.700758	0.799606	0.876378	Purifying selection
AsGRAS04	Pepsico1_Contig26725.mrna2	Os11t0705900-01	0.974417	1.07656	0.905123	Purifying selection
AsGRAS04	Pepsico1_Contig26725.mrna2	Os02t0197300-00	0.73434	0.728719	1.00771	Purifying selection
AsGRAS04	Pepsico1_Contig26725.mrna2	Os07t0545800-01	0.956438	3.18201	0.300577	Purifying selection
AsGRAS05	Pepsico1_Contig13965.mrna2	Os06t0211500-00	0.843424	1.24686	0.676441	Purifying selection
AsGRAS05	Pepsico1_Contig13965.mrna2	Os03t0103400-01	0.270274	0.711856	0.379675	Purifying selection
AsGRAS05	Pepsico1_Contig13965.mrna2	Os06t0610350-01	0.730707	0.812873	0.898919	Purifying selection
AsGRAS05	Pepsico1_Contig13965.mrna2	Os01t0948200-00	0.813816	0.94956	0.857045	Purifying selection
AsGRAS05	Pepsico1_Contig13965.mrna2	Os11t0705200-01	0.848436	1.01429	0.836486	Purifying selection
AsGRAS05	Pepsico1_Contig13965.mrna2	Os05t0378500-00	0.827972	0.887895	0.932511	Purifying selection
AsGRAS05	Pepsico1_Contig13965.mrna2	Os01t0646300-01	0.728163	0.89059	0.817618	Purifying selection
AsGRAS05	Pepsico1_Contig13965.mrna2	Os07t0589200-00	0.828997	0.790647	1.0485	Purifying selection
AsGRAS05	Pepsico1_Contig13965.mrna2	Os02t0662700-02	0.385255	1.84755	0.208522	Purifying selection
AsGRAS05	Pepsico1_Contig13965.mrna2	Os06t0127800-01	0.833526	0.826446	1.00857	Purifying selection
AsGRAS05	Pepsico1_Contig13965.mrna2	Os02t0662700-01	0.365111	1.52269	0.23978	Purifying selection
AsGRAS05	Pepsico1_Contig13965.mrna2	Os12t0573200-01	0.884711	1.24825	0.708763	Purifying selection
AsGRAS05	Pepsico1_Contig13965.mrna2	Os12t0162700-00	0.775112	2.2335	0.34704	Purifying selection
AsGRAS05	Pepsico1_Contig13965.mrna2	Os05t0574900-01	0.757936	0.753491	1.0059	Purifying selection
AsGRAS05	Pepsico1_Contig13965.mrna2	Os11t0139600-01	0.916919	1.21507	0.754624	Purifying selection
AsGRAS05	Pepsico1_Contig13965.mrna2	Os10t0551200-01	0.0758486	0.388268	0.195351	Purifying selection
AsGRAS05	Pepsico1_Contig13965.mrna2	Os03t0408600-01	0.841074	0.826717	1.01737	Purifying selection
AsGRAS05	Pepsico1_Contig13965.mrna2	Os11t0124300-01	0.787268	1.27925	0.615413	Purifying selection
AsGRAS05	Pepsico1_Contig13965.mrna2	Os07t0586900-01	0.896654	0.812214	1.10396	Purifying selection
AsGRAS05	Pepsico1_Contig13965.mrna2	Os12t0138166-00	0.94925	2.52735	0.375591	Purifying selection
AsGRAS05	Pepsico1_Contig13965.mrna2	Os02t0663100-01	0.375365	1.62919	0.2304	Purifying selection
AsGRAS05	Pepsico1_Contig13965.mrna2	Os03t0723000-01	0.770809	1.26962	0.607116	Purifying selection
AsGRAS05	Pepsico1_Contig13965.mrna2	Os05t0485400-00	0.81673	1.07313	0.761076	Purifying selection
AsGRAS05	Pepsico1_Contig13965.mrna2	Os12t0138200-00	0.865418	1.08493	0.797669	Purifying selection
AsGRAS05	Pepsico1_Contig13965.mrna2	Os05t0378200-00	0.817108	0.754506	1.08297	Purifying selection
AsGRAS05	Pepsico1_Contig13965.mrna2	Os11t0706200-00	0.890021	1.66236	0.535398	Purifying selection
AsGRAS05	Pepsico1_Contig13965.mrna2	Os03t0707600-01	0.79516	1.04425	0.761466	Purifying selection
AsGRAS05	Pepsico1_Contig13965.mrna2	Os02t0681900-01	0.848701	1.2903	0.657756	Purifying selection
AsGRAS05	Pepsico1_Contig13965.mrna2	Os11t0141700-00	0.874629	0.900649	0.97111	Purifying selection
AsGRAS05	Pepsico1_Contig13965.mrna2	Os03t0723000-02	0.770809	1.26962	0.607116	Purifying selection
AsGRAS05	Pepsico1_Contig13965.mrna2	Os11t0500050-00	0.99718	1.0092	0.988094	Purifying selection
AsGRAS05	Pepsico1_Contig13965.mrna2	Os03t0433200-01	0.853422	0.839172	1.01698	Purifying selection
AsGRAS05	Pepsico1_Contig13965.mrna2	Os04t0580300-01	0.903507	1.04287	0.866364	Purifying selection
AsGRAS05	Pepsico1_Contig13965.mrna2	Os04t0555000-01	0.398477	1.71393	0.232493	Purifying selection
AsGRAS05	Pepsico1_Contig13965.mrna2	Os05t0500600-01	1.01513	0.925346	1.09703	Purifying selection
AsGRAS05	Pepsico1_Contig13965.mrna2	Os11t0141500-00	0.865819	0.878599	0.985454	Purifying selection
AsGRAS05	Pepsico1_Contig13965.mrna2	Os07t0583600-01	0.807594	1.5253	0.529465	Purifying selection
AsGRAS05	Pepsico1_Contig13965.mrna2	Os12t0122000-01	0.76252	1.26545	0.602569	Purifying selection
AsGRAS05	Pepsico1_Contig13965.mrna2	Os07t0583600-02	0.807594	1.5253	0.529465	Purifying selection
AsGRAS05	Pepsico1_Contig13965.mrna2	Os07t0583600-03	0.848802	1.35206	0.627784	Purifying selection
AsGRAS05	Pepsico1_Contig13965.mrna2	Os03t0263300-01	0.868069	0.792664	1.09513	Purifying selection
AsGRAS05	Pepsico1_Contig13965.mrna2	Os06t0105350-01	0.450495	0.775943	0.580577	Purifying selection
AsGRAS05	Pepsico1_Contig13965.mrna2	Os04t0432100-00	0.799595	1.06539	0.750516	Purifying selection
AsGRAS05	Pepsico1_Contig13965.mrna2	Os07t0567700-01	0.721715	1.0106	0.714144	Purifying selection
AsGRAS05	Pepsico1_Contig13965.mrna2	Os07t0567700-02	0.719571	0.900997	0.798639	Purifying selection
AsGRAS05	Pepsico1_Contig13965.mrna2	Os12t0138100-00	0.845871	0.864427	0.978533	Purifying selection
AsGRAS05	Pepsico1_Contig13965.mrna2	Os07t0567700-03	0.700758	0.799606	0.876378	Purifying selection
AsGRAS05	Pepsico1_Contig13965.mrna2	Os11t0705900-01	0.974417	1.07656	0.905123	Purifying selection
AsGRAS05	Pepsico1_Contig13965.mrna2	Os02t0197300-00	0.73434	0.728719	1.00771	Purifying selection
AsGRAS05	Pepsico1_Contig13965.mrna2	Os07t0545800-01	0.956438	3.18201	0.300577	Purifying selection
AsGRAS06	Pepsico1_Contig30502.mrna2	Os01t0881500-02	0.538918	2.91106	0.185128	Purifying selection
AsGRAS06	Pepsico1_Contig30502.mrna2	Os01t0881500-01	0.538918	2.91106	0.185128	Purifying selection
AsGRAS06	Pepsico1_Contig30502.mrna2	Os02t0662700-02	0.811686	3.15937	0.256913	Purifying selection
AsGRAS06	Pepsico1_Contig30502.mrna2	Os02t0662700-01	0.811686	3.15937	0.256913	Purifying selection
AsGRAS06	Pepsico1_Contig30502.mrna2	Os12t0573200-01	0.797535	4.79752	0.166239	Purifying selection
AsGRAS06	Pepsico1_Contig30502.mrna2	Os11t0141550-01	0.788501	3.58686	0.219831	Purifying selection
AsGRAS06	Pepsico1_Contig30502.mrna2	Os12t0138166-00	0.823162	5.27579	0.156026	Purifying selection
AsGRAS06	Pepsico1_Contig30502.mrna2	Os11t0160550-00	0.860706	2.6803	0.321123	Purifying selection
AsGRAS06	Pepsico1_Contig30502.mrna2	Os10t0369600-01	0.153473	0.732529	0.209511	Purifying selection
AsGRAS06	Pepsico1_Contig30502.mrna2	Os04t0555000-01	0.858095	3.10554	0.276311	Purifying selection
AsGRAS06	Pepsico1_Contig30502.mrna2	Os03t0193000-01	0.162141	0.807292	0.200845	Purifying selection
AsGRAS06	Pepsico1_Contig30502.mrna2	Os01t0842200-01	0.767935	2.83968	0.27043	Purifying selection
AsGRAS06	Pepsico1_Contig30502.mrna2	Os01t0842200-02	0.767935	2.83968	0.27043	Purifying selection
AsGRAS07	Pepsico1_Contig18352.mrna2	Os01t0881500-02	0.538918	2.91106	0.185128	Purifying selection
AsGRAS07	Pepsico1_Contig18352.mrna2	Os01t0881500-01	0.538918	2.91106	0.185128	Purifying selection
AsGRAS07	Pepsico1_Contig18352.mrna2	Os02t0662700-02	0.811686	3.15937	0.256913	Purifying selection
AsGRAS07	Pepsico1_Contig18352.mrna2	Os02t0662700-01	0.811686	3.15937	0.256913	Purifying selection
AsGRAS07	Pepsico1_Contig18352.mrna2	Os12t0573200-01	0.797535	4.79752	0.166239	Purifying selection
AsGRAS07	Pepsico1_Contig18352.mrna2	Os11t0141550-01	0.788501	3.58686	0.219831	Purifying selection
AsGRAS07	Pepsico1_Contig18352.mrna2	Os12t0138166-00	0.823162	5.27579	0.156026	Purifying selection
AsGRAS07	Pepsico1_Contig18352.mrna2	Os11t0160550-00	0.860706	2.6803	0.321123	Purifying selection
AsGRAS07	Pepsico1_Contig18352.mrna2	Os10t0369600-01	0.153473	0.732529	0.209511	Purifying selection
AsGRAS07	Pepsico1_Contig18352.mrna2	Os04t0555000-01	0.858095	3.10554	0.276311	Purifying selection
AsGRAS07	Pepsico1_Contig18352.mrna2	Os03t0193000-01	0.162141	0.807292	0.200845	Purifying selection
AsGRAS07	Pepsico1_Contig18352.mrna2	Os01t0842200-01	0.767935	2.83968	0.27043	Purifying selection
AsGRAS07	Pepsico1_Contig18352.mrna2	Os01t0842200-02	0.767935	2.83968	0.27043	Purifying selection
AsGRAS08	Pepsico1_Contig25100.mrna1	Os06t0211500-00	0.843424	1.24686	0.676441	Purifying selection
AsGRAS08	Pepsico1_Contig25100.mrna1	Os03t0103400-01	0.270274	0.711856	0.379675	Purifying selection
AsGRAS08	Pepsico1_Contig25100.mrna1	Os06t0610350-01	0.730707	0.812873	0.898919	Purifying selection
AsGRAS08	Pepsico1_Contig25100.mrna1	Os01t0948200-00	0.813816	0.94956	0.857045	Purifying selection
AsGRAS08	Pepsico1_Contig25100.mrna1	Os11t0705200-01	0.87837	0.948724	0.925844	Purifying selection
AsGRAS08	Pepsico1_Contig25100.mrna1	Os05t0378500-00	0.827972	0.887895	0.932511	Purifying selection
AsGRAS08	Pepsico1_Contig25100.mrna1	Os01t0646300-01	0.728163	0.89059	0.817618	Purifying selection
AsGRAS08	Pepsico1_Contig25100.mrna1	Os07t0589200-00	0.828997	0.790647	1.0485	Purifying selection
AsGRAS08	Pepsico1_Contig25100.mrna1	Os02t0662700-02	0.385255	1.84755	0.208522	Purifying selection
AsGRAS08	Pepsico1_Contig25100.mrna1	Os06t0127800-01	0.833923	0.832669	1.00151	Purifying selection
AsGRAS08	Pepsico1_Contig25100.mrna1	Os02t0662700-01	0.363861	1.52269	0.238959	Purifying selection
AsGRAS08	Pepsico1_Contig25100.mrna1	Os12t0573200-01	0.876809	1.27532	0.687522	Purifying selection
AsGRAS08	Pepsico1_Contig25100.mrna1	Os12t0162700-00	0.775112	2.2335	0.34704	Purifying selection
AsGRAS08	Pepsico1_Contig25100.mrna1	Os05t0574900-01	0.757936	0.753491	1.0059	Purifying selection
AsGRAS08	Pepsico1_Contig25100.mrna1	Os11t0139600-01	0.916919	1.21507	0.754624	Purifying selection
AsGRAS08	Pepsico1_Contig25100.mrna1	Os10t0551200-01	0.0758486	0.388268	0.195351	Purifying selection
AsGRAS08	Pepsico1_Contig25100.mrna1	Os03t0408600-01	0.841074	0.826717	1.01737	Purifying selection
AsGRAS08	Pepsico1_Contig25100.mrna1	Os11t0124300-01	0.795792	1.28984	0.61697	Purifying selection
AsGRAS08	Pepsico1_Contig25100.mrna1	Os07t0586900-01	0.896654	0.812214	1.10396	Purifying selection
AsGRAS08	Pepsico1_Contig25100.mrna1	Os12t0138166-00	0.94925	2.52735	0.375591	Purifying selection
AsGRAS08	Pepsico1_Contig25100.mrna1	Os02t0663100-01	0.375365	1.62919	0.2304	Purifying selection
AsGRAS08	Pepsico1_Contig25100.mrna1	Os03t0723000-01	0.769612	1.27636	0.602976	Purifying selection
AsGRAS08	Pepsico1_Contig25100.mrna1	Os05t0485400-00	0.81673	1.07313	0.761076	Purifying selection
AsGRAS08	Pepsico1_Contig25100.mrna1	Os12t0138200-00	0.865418	1.08493	0.797669	Purifying selection
AsGRAS08	Pepsico1_Contig25100.mrna1	Os05t0378200-00	0.817108	0.754506	1.08297	Purifying selection
AsGRAS08	Pepsico1_Contig25100.mrna1	Os11t0706200-00	0.876951	1.64364	0.53354	Purifying selection
AsGRAS08	Pepsico1_Contig25100.mrna1	Os03t0707600-01	0.79516	1.04425	0.761466	Purifying selection
AsGRAS08	Pepsico1_Contig25100.mrna1	Os02t0681900-01	0.848701	1.2903	0.657756	Purifying selection
AsGRAS08	Pepsico1_Contig25100.mrna1	Os11t0141700-00	0.874629	0.900649	0.97111	Purifying selection
AsGRAS08	Pepsico1_Contig25100.mrna1	Os03t0723000-02	0.769612	1.27636	0.602976	Purifying selection
AsGRAS08	Pepsico1_Contig25100.mrna1	Os11t0500050-00	0.99718	1.0092	0.988094	Purifying selection
AsGRAS08	Pepsico1_Contig25100.mrna1	Os03t0433200-01	0.853422	0.839172	1.01698	Purifying selection
AsGRAS08	Pepsico1_Contig25100.mrna1	Os04t0580300-01	0.885554	1.12634	0.786225	Purifying selection
AsGRAS08	Pepsico1_Contig25100.mrna1	Os04t0555000-01	0.398477	1.71393	0.232493	Purifying selection
AsGRAS08	Pepsico1_Contig25100.mrna1	Os05t0500600-01	1.01513	0.925346	1.09703	Purifying selection
AsGRAS08	Pepsico1_Contig25100.mrna1	Os11t0141500-00	0.865819	0.878599	0.985454	Purifying selection
AsGRAS08	Pepsico1_Contig25100.mrna1	Os07t0583600-01	0.807594	1.5253	0.529465	Purifying selection
AsGRAS08	Pepsico1_Contig25100.mrna1	Os12t0122000-01	0.770906	1.27585	0.604228	Purifying selection
AsGRAS08	Pepsico1_Contig25100.mrna1	Os07t0583600-02	0.807594	1.5253	0.529465	Purifying selection
AsGRAS08	Pepsico1_Contig25100.mrna1	Os07t0583600-03	0.848802	1.35206	0.627784	Purifying selection
AsGRAS08	Pepsico1_Contig25100.mrna1	Os03t0263300-01	0.868069	0.792664	1.09513	Purifying selection
AsGRAS08	Pepsico1_Contig25100.mrna1	Os06t0105350-01	0.445575	0.776085	0.574132	Purifying selection
AsGRAS08	Pepsico1_Contig25100.mrna1	Os04t0432100-00	0.799595	1.06539	0.750516	Purifying selection
AsGRAS08	Pepsico1_Contig25100.mrna1	Os07t0567700-01	0.721715	1.0106	0.714144	Purifying selection
AsGRAS08	Pepsico1_Contig25100.mrna1	Os07t0567700-02	0.719571	0.900997	0.798639	Purifying selection
AsGRAS08	Pepsico1_Contig25100.mrna1	Os12t0138100-00	0.845871	0.864427	0.978533	Purifying selection
AsGRAS08	Pepsico1_Contig25100.mrna1	Os07t0567700-03	0.700758	0.799606	0.876378	Purifying selection
AsGRAS08	Pepsico1_Contig25100.mrna1	Os11t0705900-01	0.953046	1.10651	0.861312	Purifying selection
AsGRAS08	Pepsico1_Contig25100.mrna1	Os02t0197300-00	0.73434	0.728719	1.00771	Purifying selection
AsGRAS08	Pepsico1_Contig25100.mrna1	Os07t0545800-01	0.961318	3.07236	0.312892	Purifying selection
AsGRAS09	Pepsico2_Contig4966.mrna2	Os06t0211500-00	0.925692	0.995336	0.93003	Purifying selection
AsGRAS09	Pepsico2_Contig4966.mrna2	Os03t0103400-01	0.852794	0.955517	0.892495	Purifying selection
AsGRAS09	Pepsico2_Contig4966.mrna2	Os06t0610350-01	0.807742	0.831721	0.97117	Purifying selection
AsGRAS09	Pepsico2_Contig4966.mrna2	Os01t0948200-00	0.938611	1.0228	0.917688	Purifying selection
AsGRAS09	Pepsico2_Contig4966.mrna2	Os11t0705200-01	1.14608	0.991564	1.15583	Purifying selection
AsGRAS09	Pepsico2_Contig4966.mrna2	Os05t0378500-00	0.815225	1.23173	0.661852	Purifying selection
AsGRAS09	Pepsico2_Contig4966.mrna2	Os01t0646300-01	0.435546	1.09698	0.397042	Purifying selection
AsGRAS09	Pepsico2_Contig4966.mrna2	Os07t0589200-00	0.927275	1.06526	0.870466	Purifying selection
AsGRAS09	Pepsico2_Contig4966.mrna2	Os02t0662700-02	0.837866	1.51597	0.552692	Purifying selection
AsGRAS09	Pepsico2_Contig4966.mrna2	Os06t0127800-01	0.794715	0.673923	1.17924	Purifying selection
AsGRAS09	Pepsico2_Contig4966.mrna2	Os02t0662700-01	0.837866	1.51597	0.552692	Purifying selection
AsGRAS09	Pepsico2_Contig4966.mrna2	Os12t0573200-01	0.909019	0.877477	1.03595	Purifying selection
AsGRAS09	Pepsico2_Contig4966.mrna2	Os12t0162700-00	0.764138	2.17748	0.350927	Purifying selection
AsGRAS09	Pepsico2_Contig4966.mrna2	Os05t0574900-01	0.411831	0.637905	0.6456	Purifying selection
AsGRAS09	Pepsico2_Contig4966.mrna2	Os11t0139600-01	0.892525	1.01573	0.878706	Purifying selection
AsGRAS09	Pepsico2_Contig4966.mrna2	Os10t0551200-01	0.911103	1.23485	0.737827	Purifying selection
AsGRAS09	Pepsico2_Contig4966.mrna2	Os03t0408600-01	0.89321	0.874711	1.02115	Purifying selection
AsGRAS09	Pepsico2_Contig4966.mrna2	Os11t0141550-01	0.848895	1.81342	0.468118	Purifying selection
AsGRAS09	Pepsico2_Contig4966.mrna2	Os11t0124300-01	0.678422	1.32575	0.511729	Purifying selection
AsGRAS09	Pepsico2_Contig4966.mrna2	Os07t0586900-01	0.955731	1.18996	0.803161	Purifying selection
AsGRAS09	Pepsico2_Contig4966.mrna2	Os02t0663100-01	0.814988	1.39598	0.583809	Purifying selection
AsGRAS09	Pepsico2_Contig4966.mrna2	Os03t0723000-01	0.724017	1.26883	0.57062	Purifying selection
AsGRAS09	Pepsico2_Contig4966.mrna2	Os05t0485400-00	0.882536	1.01909	0.866002	Purifying selection
AsGRAS09	Pepsico2_Contig4966.mrna2	Os12t0138200-00	0.88327	1.26742	0.696904	Purifying selection
AsGRAS09	Pepsico2_Contig4966.mrna2	Os05t0378200-00	0.866673	0.825518	1.04985	Purifying selection
AsGRAS09	Pepsico2_Contig4966.mrna2	Os11t0706200-00	0.91531	1.84214	0.496874	Purifying selection
AsGRAS09	Pepsico2_Contig4966.mrna2	Os03t0707600-01	0.698717	1.2723	0.549177	Purifying selection
AsGRAS09	Pepsico2_Contig4966.mrna2	Os02t0681900-01	0.908522	0.992995	0.914931	Purifying selection
AsGRAS09	Pepsico2_Contig4966.mrna2	Os11t0141700-00	0.903998	1.24274	0.727424	Purifying selection
AsGRAS09	Pepsico2_Contig4966.mrna2	Os03t0723000-02	0.724017	1.26883	0.57062	Purifying selection
AsGRAS09	Pepsico2_Contig4966.mrna2	Os11t0500050-00	0.832727	1.08359	0.76849	Purifying selection
AsGRAS09	Pepsico2_Contig4966.mrna2	Os03t0433200-01	0.913273	1.08763	0.839688	Purifying selection
AsGRAS09	Pepsico2_Contig4966.mrna2	Os04t0580300-01	0.866105	0.929212	0.932086	Purifying selection
AsGRAS09	Pepsico2_Contig4966.mrna2	Os04t0555000-01	0.842642	1.41759	0.594418	Purifying selection
AsGRAS09	Pepsico2_Contig4966.mrna2	Os05t0500600-01	0.794986	0.942627	0.843372	Purifying selection
AsGRAS09	Pepsico2_Contig4966.mrna2	Os11t0141500-00	0.928123	1.13499	0.817735	Purifying selection
AsGRAS09	Pepsico2_Contig4966.mrna2	Os07t0583600-01	1.03265	3.91165	0.263993	Purifying selection
AsGRAS09	Pepsico2_Contig4966.mrna2	Os12t0122000-01	0.738471	1.1861	0.622605	Purifying selection
AsGRAS09	Pepsico2_Contig4966.mrna2	Os07t0583600-02	1.03265	3.91165	0.263993	Purifying selection
AsGRAS09	Pepsico2_Contig4966.mrna2	Os07t0583600-03	0.816484	0.923606	0.884017	Purifying selection
AsGRAS09	Pepsico2_Contig4966.mrna2	Os03t0263300-01	0.782651	0.860749	0.909267	Purifying selection
AsGRAS09	Pepsico2_Contig4966.mrna2	Os06t0105350-01	0.813491	1.15916	0.701792	Purifying selection
AsGRAS09	Pepsico2_Contig4966.mrna2	Os04t0432100-00	0.809009	1.14679	0.705456	Purifying selection
AsGRAS09	Pepsico2_Contig4966.mrna2	Os07t0567700-01	0.745129	0.755552	0.986205	Purifying selection
AsGRAS09	Pepsico2_Contig4966.mrna2	Os07t0567700-02	0.868591	1.00333	0.865712	Purifying selection
AsGRAS09	Pepsico2_Contig4966.mrna2	Os12t0138100-00	0.916765	1.13863	0.805149	Purifying selection
AsGRAS09	Pepsico2_Contig4966.mrna2	Os07t0567700-03	1.22365	1.12443	1.08825	Purifying selection
AsGRAS09	Pepsico2_Contig4966.mrna2	Os11t0705900-01	0.934983	1.14083	0.819566	Purifying selection
AsGRAS09	Pepsico2_Contig4966.mrna2	Os02t0197300-00	0.841065	0.964143	0.872344	Purifying selection
AsGRAS10	Pepsico2_Contig7359.mrna1	Os06t0211500-00	0.843424	1.24686	0.676441	Purifying selection
AsGRAS10	Pepsico2_Contig7359.mrna1	Os03t0103400-01	0.270274	0.711856	0.379675	Purifying selection
AsGRAS10	Pepsico2_Contig7359.mrna1	Os06t0610350-01	0.730707	0.812873	0.898919	Purifying selection
AsGRAS10	Pepsico2_Contig7359.mrna1	Os01t0948200-00	0.813816	0.94956	0.857045	Purifying selection
AsGRAS10	Pepsico2_Contig7359.mrna1	Os11t0705200-01	0.87837	0.948724	0.925844	Purifying selection
AsGRAS10	Pepsico2_Contig7359.mrna1	Os05t0378500-00	0.827972	0.887895	0.932511	Purifying selection
AsGRAS10	Pepsico2_Contig7359.mrna1	Os01t0646300-01	0.728163	0.89059	0.817618	Purifying selection
AsGRAS10	Pepsico2_Contig7359.mrna1	Os07t0589200-00	0.828997	0.790647	1.0485	Purifying selection
AsGRAS10	Pepsico2_Contig7359.mrna1	Os02t0662700-02	0.385255	1.84755	0.208522	Purifying selection
AsGRAS10	Pepsico2_Contig7359.mrna1	Os06t0127800-01	0.833923	0.832669	1.00151	Purifying selection
AsGRAS10	Pepsico2_Contig7359.mrna1	Os02t0662700-01	0.363861	1.52269	0.238959	Purifying selection
AsGRAS10	Pepsico2_Contig7359.mrna1	Os12t0573200-01	0.876809	1.27532	0.687522	Purifying selection
AsGRAS10	Pepsico2_Contig7359.mrna1	Os12t0162700-00	0.775112	2.2335	0.34704	Purifying selection
AsGRAS10	Pepsico2_Contig7359.mrna1	Os05t0574900-01	0.757936	0.753491	1.0059	Purifying selection
AsGRAS10	Pepsico2_Contig7359.mrna1	Os11t0139600-01	0.916919	1.21507	0.754624	Purifying selection
AsGRAS10	Pepsico2_Contig7359.mrna1	Os10t0551200-01	0.0758486	0.388268	0.195351	Purifying selection
AsGRAS10	Pepsico2_Contig7359.mrna1	Os03t0408600-01	0.841074	0.826717	1.01737	Purifying selection
AsGRAS10	Pepsico2_Contig7359.mrna1	Os11t0124300-01	0.795792	1.28984	0.61697	Purifying selection
AsGRAS10	Pepsico2_Contig7359.mrna1	Os07t0586900-01	0.896654	0.812214	1.10396	Purifying selection
AsGRAS10	Pepsico2_Contig7359.mrna1	Os12t0138166-00	0.94925	2.52735	0.375591	Purifying selection
AsGRAS10	Pepsico2_Contig7359.mrna1	Os02t0663100-01	0.375365	1.62919	0.2304	Purifying selection
AsGRAS10	Pepsico2_Contig7359.mrna1	Os03t0723000-01	0.769612	1.27636	0.602976	Purifying selection
AsGRAS10	Pepsico2_Contig7359.mrna1	Os05t0485400-00	0.81673	1.07313	0.761076	Purifying selection
AsGRAS10	Pepsico2_Contig7359.mrna1	Os12t0138200-00	0.865418	1.08493	0.797669	Purifying selection
AsGRAS10	Pepsico2_Contig7359.mrna1	Os05t0378200-00	0.817108	0.754506	1.08297	Purifying selection
AsGRAS10	Pepsico2_Contig7359.mrna1	Os11t0706200-00	0.876951	1.64364	0.53354	Purifying selection
AsGRAS10	Pepsico2_Contig7359.mrna1	Os03t0707600-01	0.79516	1.04425	0.761466	Purifying selection
AsGRAS10	Pepsico2_Contig7359.mrna1	Os02t0681900-01	0.848701	1.2903	0.657756	Purifying selection
AsGRAS10	Pepsico2_Contig7359.mrna1	Os11t0141700-00	0.874629	0.900649	0.97111	Purifying selection
AsGRAS10	Pepsico2_Contig7359.mrna1	Os03t0723000-02	0.769612	1.27636	0.602976	Purifying selection
AsGRAS10	Pepsico2_Contig7359.mrna1	Os11t0500050-00	0.99718	1.0092	0.988094	Purifying selection
AsGRAS10	Pepsico2_Contig7359.mrna1	Os03t0433200-01	0.853422	0.839172	1.01698	Purifying selection
AsGRAS10	Pepsico2_Contig7359.mrna1	Os04t0580300-01	0.885554	1.12634	0.786225	Purifying selection
AsGRAS10	Pepsico2_Contig7359.mrna1	Os04t0555000-01	0.398477	1.71393	0.232493	Purifying selection
AsGRAS10	Pepsico2_Contig7359.mrna1	Os05t0500600-01	1.01513	0.925346	1.09703	Purifying selection
AsGRAS10	Pepsico2_Contig7359.mrna1	Os11t0141500-00	0.865819	0.878599	0.985454	Purifying selection
AsGRAS10	Pepsico2_Contig7359.mrna1	Os07t0583600-01	0.807594	1.5253	0.529465	Purifying selection
AsGRAS10	Pepsico2_Contig7359.mrna1	Os12t0122000-01	0.770906	1.27585	0.604228	Purifying selection
AsGRAS10	Pepsico2_Contig7359.mrna1	Os07t0583600-02	0.807594	1.5253	0.529465	Purifying selection
AsGRAS10	Pepsico2_Contig7359.mrna1	Os07t0583600-03	0.848802	1.35206	0.627784	Purifying selection
AsGRAS10	Pepsico2_Contig7359.mrna1	Os03t0263300-01	0.868069	0.792664	1.09513	Purifying selection
AsGRAS10	Pepsico2_Contig7359.mrna1	Os06t0105350-01	0.445575	0.776085	0.574132	Purifying selection
AsGRAS10	Pepsico2_Contig7359.mrna1	Os04t0432100-00	0.799595	1.06539	0.750516	Purifying selection
AsGRAS10	Pepsico2_Contig7359.mrna1	Os07t0567700-01	0.721715	1.0106	0.714144	Purifying selection
AsGRAS10	Pepsico2_Contig7359.mrna1	Os07t0567700-02	0.719571	0.900997	0.798639	Purifying selection
AsGRAS10	Pepsico2_Contig7359.mrna1	Os12t0138100-00	0.845871	0.864427	0.978533	Purifying selection
AsGRAS10	Pepsico2_Contig7359.mrna1	Os07t0567700-03	0.700758	0.799606	0.876378	Purifying selection
AsGRAS10	Pepsico2_Contig7359.mrna1	Os11t0705900-01	0.953046	1.10651	0.861312	Purifying selection
AsGRAS10	Pepsico2_Contig7359.mrna1	Os02t0197300-00	0.73434	0.728719	1.00771	Purifying selection
AsGRAS10	Pepsico2_Contig7359.mrna1	Os07t0545800-01	0.961318	3.07236	0.312892	Purifying selection
AsGRAS11	Pepsico1_Contig19030.mrna1	Os06t0211500-00	0.843424	1.24686	0.676441	Purifying selection
AsGRAS11	Pepsico1_Contig19030.mrna1	Os03t0103400-01	0.270274	0.711856	0.379675	Purifying selection
AsGRAS11	Pepsico1_Contig19030.mrna1	Os06t0610350-01	0.730707	0.812873	0.898919	Purifying selection
AsGRAS11	Pepsico1_Contig19030.mrna1	Os01t0948200-00	0.813816	0.94956	0.857045	Purifying selection
AsGRAS11	Pepsico1_Contig19030.mrna1	Os11t0705200-01	0.87837	0.948724	0.925844	Purifying selection
AsGRAS11	Pepsico1_Contig19030.mrna1	Os05t0378500-00	0.827972	0.887895	0.932511	Purifying selection
AsGRAS11	Pepsico1_Contig19030.mrna1	Os01t0646300-01	0.728163	0.89059	0.817618	Purifying selection
AsGRAS11	Pepsico1_Contig19030.mrna1	Os07t0589200-00	0.828997	0.790647	1.0485	Purifying selection
AsGRAS11	Pepsico1_Contig19030.mrna1	Os02t0662700-02	0.385255	1.84755	0.208522	Purifying selection
AsGRAS11	Pepsico1_Contig19030.mrna1	Os06t0127800-01	0.833923	0.832669	1.00151	Purifying selection
AsGRAS11	Pepsico1_Contig19030.mrna1	Os02t0662700-01	0.363861	1.52269	0.238959	Purifying selection
AsGRAS11	Pepsico1_Contig19030.mrna1	Os12t0573200-01	0.876809	1.27532	0.687522	Purifying selection
AsGRAS11	Pepsico1_Contig19030.mrna1	Os12t0162700-00	0.775112	2.2335	0.34704	Purifying selection
AsGRAS11	Pepsico1_Contig19030.mrna1	Os05t0574900-01	0.757936	0.753491	1.0059	Purifying selection
AsGRAS11	Pepsico1_Contig19030.mrna1	Os11t0139600-01	0.916919	1.21507	0.754624	Purifying selection
AsGRAS11	Pepsico1_Contig19030.mrna1	Os10t0551200-01	0.0758486	0.388268	0.195351	Purifying selection
AsGRAS11	Pepsico1_Contig19030.mrna1	Os03t0408600-01	0.841074	0.826717	1.01737	Purifying selection
AsGRAS11	Pepsico1_Contig19030.mrna1	Os11t0124300-01	0.795792	1.28984	0.61697	Purifying selection
AsGRAS11	Pepsico1_Contig19030.mrna1	Os07t0586900-01	0.896654	0.812214	1.10396	Purifying selection
AsGRAS11	Pepsico1_Contig19030.mrna1	Os12t0138166-00	0.94925	2.52735	0.375591	Purifying selection
AsGRAS11	Pepsico1_Contig19030.mrna1	Os02t0663100-01	0.375365	1.62919	0.2304	Purifying selection
AsGRAS11	Pepsico1_Contig19030.mrna1	Os03t0723000-01	0.769612	1.27636	0.602976	Purifying selection
AsGRAS11	Pepsico1_Contig19030.mrna1	Os05t0485400-00	0.81673	1.07313	0.761076	Purifying selection
AsGRAS11	Pepsico1_Contig19030.mrna1	Os12t0138200-00	0.865418	1.08493	0.797669	Purifying selection
AsGRAS11	Pepsico1_Contig19030.mrna1	Os05t0378200-00	0.817108	0.754506	1.08297	Purifying selection
AsGRAS11	Pepsico1_Contig19030.mrna1	Os11t0706200-00	0.876951	1.64364	0.53354	Purifying selection
AsGRAS11	Pepsico1_Contig19030.mrna1	Os03t0707600-01	0.79516	1.04425	0.761466	Purifying selection
AsGRAS11	Pepsico1_Contig19030.mrna1	Os02t0681900-01	0.848701	1.2903	0.657756	Purifying selection
AsGRAS11	Pepsico1_Contig19030.mrna1	Os11t0141700-00	0.874629	0.900649	0.97111	Purifying selection
AsGRAS11	Pepsico1_Contig19030.mrna1	Os03t0723000-02	0.769612	1.27636	0.602976	Purifying selection
AsGRAS11	Pepsico1_Contig19030.mrna1	Os11t0500050-00	0.99718	1.0092	0.988094	Purifying selection
AsGRAS11	Pepsico1_Contig19030.mrna1	Os03t0433200-01	0.853422	0.839172	1.01698	Purifying selection
AsGRAS11	Pepsico1_Contig19030.mrna1	Os04t0580300-01	0.885554	1.12634	0.786225	Purifying selection
AsGRAS11	Pepsico1_Contig19030.mrna1	Os04t0555000-01	0.398477	1.71393	0.232493	Purifying selection
AsGRAS11	Pepsico1_Contig19030.mrna1	Os05t0500600-01	1.01513	0.925346	1.09703	Purifying selection
AsGRAS11	Pepsico1_Contig19030.mrna1	Os11t0141500-00	0.865819	0.878599	0.985454	Purifying selection
AsGRAS11	Pepsico1_Contig19030.mrna1	Os07t0583600-01	0.807594	1.5253	0.529465	Purifying selection
AsGRAS11	Pepsico1_Contig19030.mrna1	Os12t0122000-01	0.770906	1.27585	0.604228	Purifying selection
AsGRAS11	Pepsico1_Contig19030.mrna1	Os07t0583600-02	0.807594	1.5253	0.529465	Purifying selection
AsGRAS11	Pepsico1_Contig19030.mrna1	Os07t0583600-03	0.848802	1.35206	0.627784	Purifying selection
AsGRAS11	Pepsico1_Contig19030.mrna1	Os03t0263300-01	0.868069	0.792664	1.09513	Purifying selection
AsGRAS11	Pepsico1_Contig19030.mrna1	Os06t0105350-01	0.445575	0.776085	0.574132	Purifying selection
AsGRAS11	Pepsico1_Contig19030.mrna1	Os04t0432100-00	0.799595	1.06539	0.750516	Purifying selection
AsGRAS11	Pepsico1_Contig19030.mrna1	Os07t0567700-01	0.721715	1.0106	0.714144	Purifying selection
AsGRAS11	Pepsico1_Contig19030.mrna1	Os07t0567700-02	0.719571	0.900997	0.798639	Purifying selection
AsGRAS11	Pepsico1_Contig19030.mrna1	Os12t0138100-00	0.845871	0.864427	0.978533	Purifying selection
AsGRAS11	Pepsico1_Contig19030.mrna1	Os07t0567700-03	0.700758	0.799606	0.876378	Purifying selection
AsGRAS11	Pepsico1_Contig19030.mrna1	Os11t0705900-01	0.953046	1.10651	0.861312	Purifying selection
AsGRAS11	Pepsico1_Contig19030.mrna1	Os02t0197300-00	0.73434	0.728719	1.00771	Purifying selection
AsGRAS11	Pepsico1_Contig19030.mrna1	Os07t0545800-01	0.961318	3.07236	0.312892	Purifying selection
AsGRAS12	Pepsico1_Contig14278.mrna1	Os06t0211500-00	0.843424	1.24686	0.676441	Purifying selection
AsGRAS12	Pepsico1_Contig14278.mrna1	Os03t0103400-01	0.270274	0.711856	0.379675	Purifying selection
AsGRAS12	Pepsico1_Contig14278.mrna1	Os06t0610350-01	0.730707	0.812873	0.898919	Purifying selection
AsGRAS12	Pepsico1_Contig14278.mrna1	Os01t0948200-00	0.813816	0.94956	0.857045	Purifying selection
AsGRAS12	Pepsico1_Contig14278.mrna1	Os11t0705200-01	0.87837	0.948724	0.925844	Purifying selection
AsGRAS12	Pepsico1_Contig14278.mrna1	Os05t0378500-00	0.827972	0.887895	0.932511	Purifying selection
AsGRAS12	Pepsico1_Contig14278.mrna1	Os01t0646300-01	0.728163	0.89059	0.817618	Purifying selection
AsGRAS12	Pepsico1_Contig14278.mrna1	Os07t0589200-00	0.828997	0.790647	1.0485	Purifying selection
AsGRAS12	Pepsico1_Contig14278.mrna1	Os02t0662700-02	0.385255	1.84755	0.208522	Purifying selection
AsGRAS12	Pepsico1_Contig14278.mrna1	Os06t0127800-01	0.833923	0.832669	1.00151	Purifying selection
AsGRAS12	Pepsico1_Contig14278.mrna1	Os02t0662700-01	0.363861	1.52269	0.238959	Purifying selection
AsGRAS12	Pepsico1_Contig14278.mrna1	Os12t0573200-01	0.876809	1.27532	0.687522	Purifying selection
AsGRAS12	Pepsico1_Contig14278.mrna1	Os12t0162700-00	0.775112	2.2335	0.34704	Purifying selection
AsGRAS12	Pepsico1_Contig14278.mrna1	Os05t0574900-01	0.757936	0.753491	1.0059	Purifying selection
AsGRAS12	Pepsico1_Contig14278.mrna1	Os11t0139600-01	0.916919	1.21507	0.754624	Purifying selection
AsGRAS12	Pepsico1_Contig14278.mrna1	Os10t0551200-01	0.0758486	0.388268	0.195351	Purifying selection
AsGRAS12	Pepsico1_Contig14278.mrna1	Os03t0408600-01	0.841074	0.826717	1.01737	Purifying selection
AsGRAS12	Pepsico1_Contig14278.mrna1	Os11t0124300-01	0.795792	1.28984	0.61697	Purifying selection
AsGRAS12	Pepsico1_Contig14278.mrna1	Os07t0586900-01	0.896654	0.812214	1.10396	Purifying selection
AsGRAS12	Pepsico1_Contig14278.mrna1	Os12t0138166-00	0.94925	2.52735	0.375591	Purifying selection
AsGRAS12	Pepsico1_Contig14278.mrna1	Os02t0663100-01	0.375365	1.62919	0.2304	Purifying selection
AsGRAS12	Pepsico1_Contig14278.mrna1	Os03t0723000-01	0.769612	1.27636	0.602976	Purifying selection
AsGRAS12	Pepsico1_Contig14278.mrna1	Os05t0485400-00	0.81673	1.07313	0.761076	Purifying selection
AsGRAS12	Pepsico1_Contig14278.mrna1	Os12t0138200-00	0.865418	1.08493	0.797669	Purifying selection
AsGRAS12	Pepsico1_Contig14278.mrna1	Os05t0378200-00	0.817108	0.754506	1.08297	Purifying selection
AsGRAS12	Pepsico1_Contig14278.mrna1	Os11t0706200-00	0.876951	1.64364	0.53354	Purifying selection
AsGRAS12	Pepsico1_Contig14278.mrna1	Os03t0707600-01	0.79516	1.04425	0.761466	Purifying selection
AsGRAS12	Pepsico1_Contig14278.mrna1	Os02t0681900-01	0.848701	1.2903	0.657756	Purifying selection
AsGRAS12	Pepsico1_Contig14278.mrna1	Os11t0141700-00	0.874629	0.900649	0.97111	Purifying selection
AsGRAS12	Pepsico1_Contig14278.mrna1	Os03t0723000-02	0.769612	1.27636	0.602976	Purifying selection
AsGRAS12	Pepsico1_Contig14278.mrna1	Os11t0500050-00	0.99718	1.0092	0.988094	Purifying selection
AsGRAS12	Pepsico1_Contig14278.mrna1	Os03t0433200-01	0.853422	0.839172	1.01698	Purifying selection
AsGRAS12	Pepsico1_Contig14278.mrna1	Os04t0580300-01	0.885554	1.12634	0.786225	Purifying selection
AsGRAS12	Pepsico1_Contig14278.mrna1	Os04t0555000-01	0.398477	1.71393	0.232493	Purifying selection
AsGRAS12	Pepsico1_Contig14278.mrna1	Os05t0500600-01	1.01513	0.925346	1.09703	Purifying selection
AsGRAS12	Pepsico1_Contig14278.mrna1	Os11t0141500-00	0.865819	0.878599	0.985454	Purifying selection
AsGRAS12	Pepsico1_Contig14278.mrna1	Os07t0583600-01	0.807594	1.5253	0.529465	Purifying selection
AsGRAS12	Pepsico1_Contig14278.mrna1	Os12t0122000-01	0.770906	1.27585	0.604228	Purifying selection
AsGRAS12	Pepsico1_Contig14278.mrna1	Os07t0583600-02	0.807594	1.5253	0.529465	Purifying selection
AsGRAS12	Pepsico1_Contig14278.mrna1	Os07t0583600-03	0.848802	1.35206	0.627784	Purifying selection
AsGRAS12	Pepsico1_Contig14278.mrna1	Os03t0263300-01	0.868069	0.792664	1.09513	Purifying selection
AsGRAS12	Pepsico1_Contig14278.mrna1	Os06t0105350-01	0.445575	0.776085	0.574132	Purifying selection
AsGRAS12	Pepsico1_Contig14278.mrna1	Os04t0432100-00	0.799595	1.06539	0.750516	Purifying selection
AsGRAS12	Pepsico1_Contig14278.mrna1	Os07t0567700-01	0.721715	1.0106	0.714144	Purifying selection
AsGRAS12	Pepsico1_Contig14278.mrna1	Os07t0567700-02	0.719571	0.900997	0.798639	Purifying selection
AsGRAS12	Pepsico1_Contig14278.mrna1	Os12t0138100-00	0.845871	0.864427	0.978533	Purifying selection
AsGRAS12	Pepsico1_Contig14278.mrna1	Os07t0567700-03	0.700758	0.799606	0.876378	Purifying selection
AsGRAS12	Pepsico1_Contig14278.mrna1	Os11t0705900-01	0.953046	1.10651	0.861312	Purifying selection
AsGRAS12	Pepsico1_Contig14278.mrna1	Os02t0197300-00	0.73434	0.728719	1.00771	Purifying selection
AsGRAS12	Pepsico1_Contig14278.mrna1	Os07t0545800-01	0.961318	3.07236	0.312892	Purifying selection
AsGRAS13	Pepsico1_Contig14835.mrna1	Os06t0211500-00	0.867443	1.18635	0.731187	Purifying selection
AsGRAS13	Pepsico1_Contig14835.mrna1	Os03t0103400-01	0.29264	0.720437	0.406198	Purifying selection
AsGRAS13	Pepsico1_Contig14835.mrna1	Os06t0610350-01	0.677618	0.832298	0.814154	Purifying selection
AsGRAS13	Pepsico1_Contig14835.mrna1	Os01t0948200-00	0.793085	0.86608	0.915718	Purifying selection
AsGRAS13	Pepsico1_Contig14835.mrna1	Os11t0705200-01	0.898917	1.03186	0.871159	Purifying selection
AsGRAS13	Pepsico1_Contig14835.mrna1	Os05t0378500-00	0.825179	0.967571	0.852835	Purifying selection
AsGRAS13	Pepsico1_Contig14835.mrna1	Os01t0646300-01	0.72403	0.823959	0.87872	Purifying selection
AsGRAS13	Pepsico1_Contig14835.mrna1	Os07t0589200-00	0.825682	0.799724	1.03246	Purifying selection
AsGRAS13	Pepsico1_Contig14835.mrna1	Os02t0662700-02	0.36401	1.67456	0.217376	Purifying selection
AsGRAS13	Pepsico1_Contig14835.mrna1	Os06t0127800-01	0.840274	0.804752	1.04414	Purifying selection
AsGRAS13	Pepsico1_Contig14835.mrna1	Os02t0662700-01	0.363968	1.63097	0.22316	Purifying selection
AsGRAS13	Pepsico1_Contig14835.mrna1	Os12t0573200-01	0.863004	1.15897	0.744633	Purifying selection
AsGRAS13	Pepsico1_Contig14835.mrna1	Os12t0162700-00	0.688593	1.48637	0.463272	Purifying selection
AsGRAS13	Pepsico1_Contig14835.mrna1	Os05t0574900-01	0.777755	0.746289	1.04216	Purifying selection
AsGRAS13	Pepsico1_Contig14835.mrna1	Os11t0139600-01	0.883902	1.17356	0.753181	Purifying selection
AsGRAS13	Pepsico1_Contig14835.mrna1	Os10t0551200-01	0.0792517	0.39529	0.20049	Purifying selection
AsGRAS13	Pepsico1_Contig14835.mrna1	Os03t0408600-01	0.815381	0.763809	1.06752	Purifying selection
AsGRAS13	Pepsico1_Contig14835.mrna1	Os11t0141550-01	1.21749	2.77826	0.43822	Purifying selection
AsGRAS13	Pepsico1_Contig14835.mrna1	Os11t0124300-01	0.829731	1.19801	0.692588	Purifying selection
AsGRAS13	Pepsico1_Contig14835.mrna1	Os07t0586900-01	0.896519	0.896288	1.00026	Purifying selection
AsGRAS13	Pepsico1_Contig14835.mrna1	Os02t0663100-01	0.362177	1.6385	0.221042	Purifying selection
AsGRAS13	Pepsico1_Contig14835.mrna1	Os03t0723000-01	0.747723	1.01047	0.739975	Purifying selection
AsGRAS13	Pepsico1_Contig14835.mrna1	Os05t0485400-00	0.789928	1.03904	0.76025	Purifying selection
AsGRAS13	Pepsico1_Contig14835.mrna1	Os12t0138200-00	0.808257	0.887877	0.910326	Purifying selection
AsGRAS13	Pepsico1_Contig14835.mrna1	Os05t0378200-00	0.769138	0.769828	0.999104	Purifying selection
AsGRAS13	Pepsico1_Contig14835.mrna1	Os11t0706200-00	0.905335	1.49735	0.604626	Purifying selection
AsGRAS13	Pepsico1_Contig14835.mrna1	Os03t0707600-01	0.801896	1.02702	0.780798	Purifying selection
AsGRAS13	Pepsico1_Contig14835.mrna1	Os02t0681900-01	0.823617	1.18429	0.695453	Purifying selection
AsGRAS13	Pepsico1_Contig14835.mrna1	Os11t0141700-00	0.805521	0.862233	0.934226	Purifying selection
AsGRAS13	Pepsico1_Contig14835.mrna1	Os03t0723000-02	0.747723	1.01047	0.739975	Purifying selection
AsGRAS13	Pepsico1_Contig14835.mrna1	Os11t0500050-00	0.797071	0.83721	0.952056	Purifying selection
AsGRAS13	Pepsico1_Contig14835.mrna1	Os03t0433200-01	0.878859	0.858386	1.02385	Purifying selection
AsGRAS13	Pepsico1_Contig14835.mrna1	Os04t0580300-01	0.824285	1.13557	0.725876	Purifying selection
AsGRAS13	Pepsico1_Contig14835.mrna1	Os04t0555000-01	0.393242	1.63312	0.240793	Purifying selection
AsGRAS13	Pepsico1_Contig14835.mrna1	Os05t0500600-01	1.04205	0.876464	1.18892	Purifying selection
AsGRAS13	Pepsico1_Contig14835.mrna1	Os11t0141500-00	0.839924	0.811952	1.03445	Purifying selection
AsGRAS13	Pepsico1_Contig14835.mrna1	Os07t0583600-01	0.829567	1.53886	0.539079	Purifying selection
AsGRAS13	Pepsico1_Contig14835.mrna1	Os12t0122000-01	0.845961	1.14423	0.73933	Purifying selection
AsGRAS13	Pepsico1_Contig14835.mrna1	Os07t0583600-02	0.829567	1.53886	0.539079	Purifying selection
AsGRAS13	Pepsico1_Contig14835.mrna1	Os07t0583600-03	0.867377	1.32426	0.654988	Purifying selection
AsGRAS13	Pepsico1_Contig14835.mrna1	Os03t0263300-01	0.8757	0.791784	1.10598	Purifying selection
AsGRAS13	Pepsico1_Contig14835.mrna1	Os06t0105350-01	0.448898	0.770243	0.582801	Purifying selection
AsGRAS13	Pepsico1_Contig14835.mrna1	Os04t0432100-00	0.77424	0.919825	0.841725	Purifying selection
AsGRAS13	Pepsico1_Contig14835.mrna1	Os07t0567700-01	0.913605	1.06062	0.861391	Purifying selection
AsGRAS13	Pepsico1_Contig14835.mrna1	Os07t0567700-02	0.738949	0.856019	0.863239	Purifying selection
AsGRAS13	Pepsico1_Contig14835.mrna1	Os12t0138100-00	0.853976	0.779097	1.09611	Purifying selection
AsGRAS13	Pepsico1_Contig14835.mrna1	Os01t0842200-01	0.925998	1.95497	0.473664	Purifying selection
AsGRAS13	Pepsico1_Contig14835.mrna1	Os07t0567700-03	1.02764	0.970103	1.05931	Purifying selection
AsGRAS13	Pepsico1_Contig14835.mrna1	Os11t0705900-01	0.930601	0.980995	0.94863	Purifying selection
AsGRAS13	Pepsico1_Contig14835.mrna1	Os02t0197300-00	0.710502	0.743593	0.955499	Purifying selection
AsGRAS13	Pepsico1_Contig14835.mrna1	Os01t0842200-02	0.925998	1.95497	0.473664	Purifying selection
AsGRAS13	Pepsico1_Contig14835.mrna1	Os07t0545800-01	0.891913	2.76896	0.322111	Purifying selection
AsGRAS14	Pepsico1_Contig27727.mrna1	Os06t0211500-00	0.867443	1.18635	0.731187	Purifying selection
AsGRAS14	Pepsico1_Contig27727.mrna1	Os03t0103400-01	0.29264	0.720437	0.406198	Purifying selection
AsGRAS14	Pepsico1_Contig27727.mrna1	Os06t0610350-01	0.677618	0.832298	0.814154	Purifying selection
AsGRAS14	Pepsico1_Contig27727.mrna1	Os01t0948200-00	0.793085	0.86608	0.915718	Purifying selection
AsGRAS14	Pepsico1_Contig27727.mrna1	Os11t0705200-01	0.898917	1.03186	0.871159	Purifying selection
AsGRAS14	Pepsico1_Contig27727.mrna1	Os05t0378500-00	0.825179	0.967571	0.852835	Purifying selection
AsGRAS14	Pepsico1_Contig27727.mrna1	Os01t0646300-01	0.72403	0.823959	0.87872	Purifying selection
AsGRAS14	Pepsico1_Contig27727.mrna1	Os07t0589200-00	0.825682	0.799724	1.03246	Purifying selection
AsGRAS14	Pepsico1_Contig27727.mrna1	Os02t0662700-02	0.36401	1.67456	0.217376	Purifying selection
AsGRAS14	Pepsico1_Contig27727.mrna1	Os06t0127800-01	0.840274	0.804752	1.04414	Purifying selection
AsGRAS14	Pepsico1_Contig27727.mrna1	Os02t0662700-01	0.363968	1.63097	0.22316	Purifying selection
AsGRAS14	Pepsico1_Contig27727.mrna1	Os12t0573200-01	0.863004	1.15897	0.744633	Purifying selection
AsGRAS14	Pepsico1_Contig27727.mrna1	Os12t0162700-00	0.688593	1.48637	0.463272	Purifying selection
AsGRAS14	Pepsico1_Contig27727.mrna1	Os05t0574900-01	0.777755	0.746289	1.04216	Purifying selection
AsGRAS14	Pepsico1_Contig27727.mrna1	Os11t0139600-01	0.883902	1.17356	0.753181	Purifying selection
AsGRAS14	Pepsico1_Contig27727.mrna1	Os10t0551200-01	0.0792517	0.39529	0.20049	Purifying selection
AsGRAS14	Pepsico1_Contig27727.mrna1	Os03t0408600-01	0.815381	0.763809	1.06752	Purifying selection
AsGRAS14	Pepsico1_Contig27727.mrna1	Os11t0141550-01	1.21749	2.77826	0.43822	Purifying selection
AsGRAS14	Pepsico1_Contig27727.mrna1	Os11t0124300-01	0.829731	1.19801	0.692588	Purifying selection
AsGRAS14	Pepsico1_Contig27727.mrna1	Os07t0586900-01	0.896519	0.896288	1.00026	Purifying selection
AsGRAS14	Pepsico1_Contig27727.mrna1	Os02t0663100-01	0.362177	1.6385	0.221042	Purifying selection
AsGRAS14	Pepsico1_Contig27727.mrna1	Os03t0723000-01	0.747723	1.01047	0.739975	Purifying selection
AsGRAS14	Pepsico1_Contig27727.mrna1	Os05t0485400-00	0.789928	1.03904	0.76025	Purifying selection
AsGRAS14	Pepsico1_Contig27727.mrna1	Os12t0138200-00	0.808257	0.887877	0.910326	Purifying selection
AsGRAS14	Pepsico1_Contig27727.mrna1	Os05t0378200-00	0.769138	0.769828	0.999104	Purifying selection
AsGRAS14	Pepsico1_Contig27727.mrna1	Os11t0706200-00	0.905335	1.49735	0.604626	Purifying selection
AsGRAS14	Pepsico1_Contig27727.mrna1	Os03t0707600-01	0.801896	1.02702	0.780798	Purifying selection
AsGRAS14	Pepsico1_Contig27727.mrna1	Os02t0681900-01	0.823617	1.18429	0.695453	Purifying selection
AsGRAS14	Pepsico1_Contig27727.mrna1	Os11t0141700-00	0.805521	0.862233	0.934226	Purifying selection
AsGRAS14	Pepsico1_Contig27727.mrna1	Os03t0723000-02	0.747723	1.01047	0.739975	Purifying selection
AsGRAS14	Pepsico1_Contig27727.mrna1	Os11t0500050-00	0.797071	0.83721	0.952056	Purifying selection
AsGRAS14	Pepsico1_Contig27727.mrna1	Os03t0433200-01	0.878859	0.858386	1.02385	Purifying selection
AsGRAS14	Pepsico1_Contig27727.mrna1	Os04t0580300-01	0.824285	1.13557	0.725876	Purifying selection
AsGRAS14	Pepsico1_Contig27727.mrna1	Os04t0555000-01	0.393242	1.63312	0.240793	Purifying selection
AsGRAS14	Pepsico1_Contig27727.mrna1	Os05t0500600-01	1.04205	0.876464	1.18892	Purifying selection
AsGRAS14	Pepsico1_Contig27727.mrna1	Os11t0141500-00	0.839924	0.811952	1.03445	Purifying selection
AsGRAS14	Pepsico1_Contig27727.mrna1	Os07t0583600-01	0.829567	1.53886	0.539079	Purifying selection
AsGRAS14	Pepsico1_Contig27727.mrna1	Os12t0122000-01	0.845961	1.14423	0.73933	Purifying selection
AsGRAS14	Pepsico1_Contig27727.mrna1	Os07t0583600-02	0.829567	1.53886	0.539079	Purifying selection
AsGRAS14	Pepsico1_Contig27727.mrna1	Os07t0583600-03	0.867377	1.32426	0.654988	Purifying selection
AsGRAS14	Pepsico1_Contig27727.mrna1	Os03t0263300-01	0.8757	0.791784	1.10598	Purifying selection
AsGRAS14	Pepsico1_Contig27727.mrna1	Os06t0105350-01	0.448898	0.770243	0.582801	Purifying selection
AsGRAS14	Pepsico1_Contig27727.mrna1	Os04t0432100-00	0.77424	0.919825	0.841725	Purifying selection
AsGRAS14	Pepsico1_Contig27727.mrna1	Os07t0567700-01	0.913605	1.06062	0.861391	Purifying selection
AsGRAS14	Pepsico1_Contig27727.mrna1	Os07t0567700-02	0.738949	0.856019	0.863239	Purifying selection
AsGRAS14	Pepsico1_Contig27727.mrna1	Os12t0138100-00	0.853976	0.779097	1.09611	Purifying selection
AsGRAS14	Pepsico1_Contig27727.mrna1	Os01t0842200-01	0.925998	1.95497	0.473664	Purifying selection
AsGRAS14	Pepsico1_Contig27727.mrna1	Os07t0567700-03	1.02764	0.970103	1.05931	Purifying selection
AsGRAS14	Pepsico1_Contig27727.mrna1	Os11t0705900-01	0.930601	0.980995	0.94863	Purifying selection
AsGRAS14	Pepsico1_Contig27727.mrna1	Os02t0197300-00	0.710502	0.743593	0.955499	Purifying selection
AsGRAS14	Pepsico1_Contig27727.mrna1	Os01t0842200-02	0.925998	1.95497	0.473664	Purifying selection
AsGRAS14	Pepsico1_Contig27727.mrna1	Os07t0545800-01	0.891913	2.76896	0.322111	Purifying selection
AsGRAS15	Pepsico1_Contig30502.mrna1	Os01t0881500-02	0.536819	3.01255	0.178194	Purifying selection
AsGRAS15	Pepsico1_Contig30502.mrna1	Os01t0881500-01	0.536819	3.01255	0.178194	Purifying selection
AsGRAS15	Pepsico1_Contig30502.mrna1	Os03t0690600-03	0.843644	4.34864	0.194002	Purifying selection
AsGRAS15	Pepsico1_Contig30502.mrna1	Os02t0662700-02	0.837368	3.64339	0.229832	Purifying selection
AsGRAS15	Pepsico1_Contig30502.mrna1	Os03t0690600-01	0.843644	4.34864	0.194002	Purifying selection
AsGRAS15	Pepsico1_Contig30502.mrna1	Os02t0662700-01	0.837368	3.64339	0.229832	Purifying selection
AsGRAS15	Pepsico1_Contig30502.mrna1	Os03t0690600-02	0.843644	4.34864	0.194002	Purifying selection
AsGRAS15	Pepsico1_Contig30502.mrna1	Os12t0573200-01	0.777537	5.73691	0.135532	Purifying selection
AsGRAS15	Pepsico1_Contig30502.mrna1	Os11t0141550-01	0.777784	3.58686	0.216843	Purifying selection
AsGRAS15	Pepsico1_Contig30502.mrna1	Os11t0160550-00	0.863941	2.57167	0.335945	Purifying selection
AsGRAS15	Pepsico1_Contig30502.mrna1	Os10t0369600-01	0.148669	0.732529	0.202953	Purifying selection
AsGRAS15	Pepsico1_Contig30502.mrna1	Os04t0555000-01	0.882273	2.51206	0.351215	Purifying selection
AsGRAS15	Pepsico1_Contig30502.mrna1	Os03t0193000-01	0.161211	0.797379	0.202176	Purifying selection
AsGRAS15	Pepsico1_Contig30502.mrna1	Os01t0842200-01	0.762626	3.12165	0.244302	Purifying selection
AsGRAS15	Pepsico1_Contig30502.mrna1	Os01t0842200-02	0.762626	3.12165	0.244302	Purifying selection
AsGRAS16	Pepsico2_Contig7359.mrna2	Os06t0211500-00	0.849555	1.21932	0.696742	Purifying selection
AsGRAS16	Pepsico2_Contig7359.mrna2	Os03t0103400-01	0.283028	0.706779	0.400447	Purifying selection
AsGRAS16	Pepsico2_Contig7359.mrna2	Os06t0610350-01	0.69795	0.833948	0.836922	Purifying selection
AsGRAS16	Pepsico2_Contig7359.mrna2	Os01t0948200-00	0.803129	0.821832	0.977242	Purifying selection
AsGRAS16	Pepsico2_Contig7359.mrna2	Os11t0705200-01	0.845931	0.949839	0.890605	Purifying selection
AsGRAS16	Pepsico2_Contig7359.mrna2	Os05t0378500-00	0.815679	0.895136	0.911234	Purifying selection
AsGRAS16	Pepsico2_Contig7359.mrna2	Os01t0646300-01	0.73764	0.897737	0.821666	Purifying selection
AsGRAS16	Pepsico2_Contig7359.mrna2	Os07t0589200-00	0.844911	0.929458	0.909037	Purifying selection
AsGRAS16	Pepsico2_Contig7359.mrna2	Os02t0662700-02	0.379198	1.95103	0.194358	Purifying selection
AsGRAS16	Pepsico2_Contig7359.mrna2	Os06t0127800-01	0.891472	0.862631	1.03343	Purifying selection
AsGRAS16	Pepsico2_Contig7359.mrna2	Os02t0662700-01	0.366677	1.57017	0.233526	Purifying selection
AsGRAS16	Pepsico2_Contig7359.mrna2	Os12t0573200-01	0.848351	1.22268	0.693847	Purifying selection
AsGRAS16	Pepsico2_Contig7359.mrna2	Os12t0162700-00	0.770825	1.79174	0.430211	Purifying selection
AsGRAS16	Pepsico2_Contig7359.mrna2	Os05t0574900-01	0.772831	0.844737	0.914877	Purifying selection
AsGRAS16	Pepsico2_Contig7359.mrna2	Os11t0139600-01	0.900954	1.17097	0.769405	Purifying selection
AsGRAS16	Pepsico2_Contig7359.mrna2	Os10t0551200-01	0.0745418	0.388944	0.191652	Purifying selection
AsGRAS16	Pepsico2_Contig7359.mrna2	Os03t0408600-01	0.844517	0.842423	1.00249	Purifying selection
AsGRAS16	Pepsico2_Contig7359.mrna2	Os11t0124300-01	0.819782	1.23373	0.664472	Purifying selection
AsGRAS16	Pepsico2_Contig7359.mrna2	Os07t0586900-01	0.912625	0.822608	1.10943	Purifying selection
AsGRAS16	Pepsico2_Contig7359.mrna2	Os12t0138166-00	0.951149	2.86206	0.332331	Purifying selection
AsGRAS16	Pepsico2_Contig7359.mrna2	Os02t0663100-01	0.373157	1.53284	0.243442	Purifying selection
AsGRAS16	Pepsico2_Contig7359.mrna2	Os03t0723000-01	0.710484	1.25459	0.566308	Purifying selection
AsGRAS16	Pepsico2_Contig7359.mrna2	Os05t0485400-00	0.803419	0.99109	0.810641	Purifying selection
AsGRAS16	Pepsico2_Contig7359.mrna2	Os12t0138200-00	0.873693	1.09815	0.795604	Purifying selection
AsGRAS16	Pepsico2_Contig7359.mrna2	Os05t0378200-00	0.884992	0.864856	1.02328	Purifying selection
AsGRAS16	Pepsico2_Contig7359.mrna2	Os11t0706200-00	0.927476	1.57441	0.589093	Purifying selection
AsGRAS16	Pepsico2_Contig7359.mrna2	Os03t0707600-01	0.760281	0.943799	0.805554	Purifying selection
AsGRAS16	Pepsico2_Contig7359.mrna2	Os02t0681900-01	0.85988	1.27343	0.675245	Purifying selection
AsGRAS16	Pepsico2_Contig7359.mrna2	Os11t0160550-00	0.824976	3.25612	0.253362	Purifying selection
AsGRAS16	Pepsico2_Contig7359.mrna2	Os11t0141700-00	0.875241	0.89383	0.979204	Purifying selection
AsGRAS16	Pepsico2_Contig7359.mrna2	Os03t0723000-02	0.710484	1.25459	0.566308	Purifying selection
AsGRAS16	Pepsico2_Contig7359.mrna2	Os11t0500050-00	0.974844	1.04649	0.93154	Purifying selection
AsGRAS16	Pepsico2_Contig7359.mrna2	Os03t0433200-01	0.902987	0.813753	1.10966	Purifying selection
AsGRAS16	Pepsico2_Contig7359.mrna2	Os04t0580300-01	0.86764	1.03198	0.840754	Purifying selection
AsGRAS16	Pepsico2_Contig7359.mrna2	Os04t0555000-01	0.393948	1.66021	0.237288	Purifying selection
AsGRAS16	Pepsico2_Contig7359.mrna2	Os05t0500600-01	1.01948	0.871195	1.17021	Purifying selection
AsGRAS16	Pepsico2_Contig7359.mrna2	Os11t0141500-00	0.868009	0.908423	0.955512	Purifying selection
AsGRAS16	Pepsico2_Contig7359.mrna2	Os07t0583600-01	0.832557	1.50074	0.554764	Purifying selection
AsGRAS16	Pepsico2_Contig7359.mrna2	Os12t0122000-01	0.780134	1.1955	0.652561	Purifying selection
AsGRAS16	Pepsico2_Contig7359.mrna2	Os07t0583600-02	0.832557	1.50074	0.554764	Purifying selection
AsGRAS16	Pepsico2_Contig7359.mrna2	Os07t0583600-03	0.862201	1.27997	0.673609	Purifying selection
AsGRAS16	Pepsico2_Contig7359.mrna2	Os03t0263300-01	0.847466	0.771023	1.09914	Purifying selection
AsGRAS16	Pepsico2_Contig7359.mrna2	Os06t0105350-01	0.453058	0.698563	0.648558	Purifying selection
AsGRAS16	Pepsico2_Contig7359.mrna2	Os04t0432100-00	0.806166	1.00725	0.800361	Purifying selection
AsGRAS16	Pepsico2_Contig7359.mrna2	Os07t0567700-01	0.733288	0.939265	0.780704	Purifying selection
AsGRAS16	Pepsico2_Contig7359.mrna2	Os07t0567700-02	0.744993	0.818469	0.910227	Purifying selection
AsGRAS16	Pepsico2_Contig7359.mrna2	Os12t0138100-00	0.866906	0.8675	0.999315	Purifying selection
AsGRAS16	Pepsico2_Contig7359.mrna2	Os07t0567700-03	1.05488	0.901615	1.16999	Purifying selection
AsGRAS16	Pepsico2_Contig7359.mrna2	Os11t0705900-01	0.954159	0.99499	0.958964	Purifying selection
AsGRAS16	Pepsico2_Contig7359.mrna2	Os02t0197300-00	0.730693	0.721681	1.01249	Purifying selection
AsGRAS16	Pepsico2_Contig7359.mrna2	Os07t0545800-01	0.901356	2.62964	0.342767	Purifying selection
AsGRAS17	Pepsico1_Contig18352.mrna1	Os01t0881500-02	0.536819	3.01255	0.178194	Purifying selection
AsGRAS17	Pepsico1_Contig18352.mrna1	Os01t0881500-01	0.536819	3.01255	0.178194	Purifying selection
AsGRAS17	Pepsico1_Contig18352.mrna1	Os03t0690600-03	0.843644	4.34864	0.194002	Purifying selection
AsGRAS17	Pepsico1_Contig18352.mrna1	Os02t0662700-02	0.837368	3.64339	0.229832	Purifying selection
AsGRAS17	Pepsico1_Contig18352.mrna1	Os03t0690600-01	0.843644	4.34864	0.194002	Purifying selection
AsGRAS17	Pepsico1_Contig18352.mrna1	Os02t0662700-01	0.837368	3.64339	0.229832	Purifying selection
AsGRAS17	Pepsico1_Contig18352.mrna1	Os03t0690600-02	0.843644	4.34864	0.194002	Purifying selection
AsGRAS17	Pepsico1_Contig18352.mrna1	Os12t0573200-01	0.777537	5.73691	0.135532	Purifying selection
AsGRAS17	Pepsico1_Contig18352.mrna1	Os11t0141550-01	0.777784	3.58686	0.216843	Purifying selection
AsGRAS17	Pepsico1_Contig18352.mrna1	Os11t0160550-00	0.863941	2.57167	0.335945	Purifying selection
AsGRAS17	Pepsico1_Contig18352.mrna1	Os10t0369600-01	0.148669	0.732529	0.202953	Purifying selection
AsGRAS17	Pepsico1_Contig18352.mrna1	Os04t0555000-01	0.882273	2.51206	0.351215	Purifying selection
AsGRAS17	Pepsico1_Contig18352.mrna1	Os03t0193000-01	0.161211	0.797379	0.202176	Purifying selection
AsGRAS17	Pepsico1_Contig18352.mrna1	Os01t0842200-01	0.762626	3.12165	0.244302	Purifying selection
AsGRAS17	Pepsico1_Contig18352.mrna1	Os01t0842200-02	0.762626	3.12165	0.244302	Purifying selection
AsGRAS18	Pepsico2_Contig16943.mrna3	Os06t0211500-00	0.699171	4.33113	0.161429	Purifying selection
AsGRAS18	Pepsico2_Contig16943.mrna3	Os11t0141550-01	0.947532	2.34924	0.403336	Purifying selection
AsGRAS18	Pepsico2_Contig16943.mrna3	Os11t0160550-00	0.808345	1.68303	0.480292	Purifying selection
AsGRAS18	Pepsico2_Contig16943.mrna3	Os11t0500050-00	0.908214	1.89208	0.480009	Purifying selection
AsGRAS18	Pepsico2_Contig16943.mrna3	Os10t0369600-01	0.297737	0.893133	0.333362	Purifying selection
AsGRAS18	Pepsico2_Contig16943.mrna3	Os03t0193000-01	0.114786	0.539093	0.212924	Purifying selection
AsGRAS18	Pepsico2_Contig16943.mrna3	Os01t0842200-01	0.773254	3.18417	0.242843	Purifying selection
AsGRAS18	Pepsico2_Contig16943.mrna3	Os07t0567700-03	0.651647	4.21801	0.154491	Purifying selection
AsGRAS18	Pepsico2_Contig16943.mrna3	Os01t0842200-02	0.773254	3.18417	0.242843	Purifying selection
AsGRAS19	Pepsico2_Contig5101.mrna1	Os06t0211500-00	0.699171	4.33113	0.161429	Purifying selection
AsGRAS19	Pepsico2_Contig5101.mrna1	Os11t0141550-01	0.947532	2.34924	0.403336	Purifying selection
AsGRAS19	Pepsico2_Contig5101.mrna1	Os11t0160550-00	0.808345	1.68303	0.480292	Purifying selection
AsGRAS19	Pepsico2_Contig5101.mrna1	Os11t0500050-00	0.908214	1.89208	0.480009	Purifying selection
AsGRAS19	Pepsico2_Contig5101.mrna1	Os10t0369600-01	0.297737	0.893133	0.333362	Purifying selection
AsGRAS19	Pepsico2_Contig5101.mrna1	Os03t0193000-01	0.114786	0.539093	0.212924	Purifying selection
AsGRAS19	Pepsico2_Contig5101.mrna1	Os01t0842200-01	0.773254	3.18417	0.242843	Purifying selection
AsGRAS19	Pepsico2_Contig5101.mrna1	Os07t0567700-03	0.651647	4.21801	0.154491	Purifying selection
AsGRAS19	Pepsico2_Contig5101.mrna1	Os01t0842200-02	0.773254	3.18417	0.242843	Purifying selection
AsGRAS20	Pepsico2_Contig1709.mrna1	Os01t0881500-02	0.536819	3.01255	0.178194	Purifying selection
AsGRAS20	Pepsico2_Contig1709.mrna1	Os01t0881500-01	0.536819	3.01255	0.178194	Purifying selection
AsGRAS20	Pepsico2_Contig1709.mrna1	Os03t0690600-03	0.843644	4.34864	0.194002	Purifying selection
AsGRAS20	Pepsico2_Contig1709.mrna1	Os02t0662700-02	0.837368	3.64339	0.229832	Purifying selection
AsGRAS20	Pepsico2_Contig1709.mrna1	Os03t0690600-01	0.843644	4.34864	0.194002	Purifying selection
AsGRAS20	Pepsico2_Contig1709.mrna1	Os02t0662700-01	0.837368	3.64339	0.229832	Purifying selection
AsGRAS20	Pepsico2_Contig1709.mrna1	Os03t0690600-02	0.843644	4.34864	0.194002	Purifying selection
AsGRAS20	Pepsico2_Contig1709.mrna1	Os12t0573200-01	0.777537	5.73691	0.135532	Purifying selection
AsGRAS20	Pepsico2_Contig1709.mrna1	Os11t0141550-01	0.777784	3.58686	0.216843	Purifying selection
AsGRAS20	Pepsico2_Contig1709.mrna1	Os11t0160550-00	0.863941	2.57167	0.335945	Purifying selection
AsGRAS20	Pepsico2_Contig1709.mrna1	Os10t0369600-01	0.148669	0.732529	0.202953	Purifying selection
AsGRAS20	Pepsico2_Contig1709.mrna1	Os04t0555000-01	0.882273	2.51206	0.351215	Purifying selection
AsGRAS20	Pepsico2_Contig1709.mrna1	Os03t0193000-01	0.161211	0.797379	0.202176	Purifying selection
AsGRAS20	Pepsico2_Contig1709.mrna1	Os01t0842200-01	0.762626	3.12165	0.244302	Purifying selection
AsGRAS20	Pepsico2_Contig1709.mrna1	Os01t0842200-02	0.762626	3.12165	0.244302	Purifying selection
AsGRAS21	Pepsico1_Contig29889.mrna2	Os06t0211500-00	0.849555	1.21932	0.696742	Purifying selection
AsGRAS21	Pepsico1_Contig29889.mrna2	Os03t0103400-01	0.283028	0.706779	0.400447	Purifying selection
AsGRAS21	Pepsico1_Contig29889.mrna2	Os06t0610350-01	0.69795	0.833948	0.836922	Purifying selection
AsGRAS21	Pepsico1_Contig29889.mrna2	Os01t0948200-00	0.803129	0.821832	0.977242	Purifying selection
AsGRAS21	Pepsico1_Contig29889.mrna2	Os11t0705200-01	0.845931	0.949839	0.890605	Purifying selection
AsGRAS21	Pepsico1_Contig29889.mrna2	Os05t0378500-00	0.815679	0.895136	0.911234	Purifying selection
AsGRAS21	Pepsico1_Contig29889.mrna2	Os01t0646300-01	0.73764	0.897737	0.821666	Purifying selection
AsGRAS21	Pepsico1_Contig29889.mrna2	Os07t0589200-00	0.844911	0.929458	0.909037	Purifying selection
AsGRAS21	Pepsico1_Contig29889.mrna2	Os02t0662700-02	0.379198	1.95103	0.194358	Purifying selection
AsGRAS21	Pepsico1_Contig29889.mrna2	Os06t0127800-01	0.891472	0.862631	1.03343	Purifying selection
AsGRAS21	Pepsico1_Contig29889.mrna2	Os02t0662700-01	0.366677	1.57017	0.233526	Purifying selection
AsGRAS21	Pepsico1_Contig29889.mrna2	Os12t0573200-01	0.848351	1.22268	0.693847	Purifying selection
AsGRAS21	Pepsico1_Contig29889.mrna2	Os12t0162700-00	0.770825	1.79174	0.430211	Purifying selection
AsGRAS21	Pepsico1_Contig29889.mrna2	Os05t0574900-01	0.772831	0.844737	0.914877	Purifying selection
AsGRAS21	Pepsico1_Contig29889.mrna2	Os11t0139600-01	0.900954	1.17097	0.769405	Purifying selection
AsGRAS21	Pepsico1_Contig29889.mrna2	Os10t0551200-01	0.0745418	0.388944	0.191652	Purifying selection
AsGRAS21	Pepsico1_Contig29889.mrna2	Os03t0408600-01	0.844517	0.842423	1.00249	Purifying selection
AsGRAS21	Pepsico1_Contig29889.mrna2	Os11t0124300-01	0.819782	1.23373	0.664472	Purifying selection
AsGRAS21	Pepsico1_Contig29889.mrna2	Os07t0586900-01	0.912625	0.822608	1.10943	Purifying selection
AsGRAS21	Pepsico1_Contig29889.mrna2	Os12t0138166-00	0.951149	2.86206	0.332331	Purifying selection
AsGRAS21	Pepsico1_Contig29889.mrna2	Os02t0663100-01	0.373157	1.53284	0.243442	Purifying selection
AsGRAS21	Pepsico1_Contig29889.mrna2	Os03t0723000-01	0.710484	1.25459	0.566308	Purifying selection
AsGRAS21	Pepsico1_Contig29889.mrna2	Os05t0485400-00	0.803419	0.99109	0.810641	Purifying selection
AsGRAS21	Pepsico1_Contig29889.mrna2	Os12t0138200-00	0.873693	1.09815	0.795604	Purifying selection
AsGRAS21	Pepsico1_Contig29889.mrna2	Os05t0378200-00	0.884992	0.864856	1.02328	Purifying selection
AsGRAS21	Pepsico1_Contig29889.mrna2	Os11t0706200-00	0.927476	1.57441	0.589093	Purifying selection
AsGRAS21	Pepsico1_Contig29889.mrna2	Os03t0707600-01	0.760281	0.943799	0.805554	Purifying selection
AsGRAS21	Pepsico1_Contig29889.mrna2	Os02t0681900-01	0.85988	1.27343	0.675245	Purifying selection
AsGRAS21	Pepsico1_Contig29889.mrna2	Os11t0160550-00	0.824976	3.25612	0.253362	Purifying selection
AsGRAS21	Pepsico1_Contig29889.mrna2	Os11t0141700-00	0.875241	0.89383	0.979204	Purifying selection
AsGRAS21	Pepsico1_Contig29889.mrna2	Os03t0723000-02	0.710484	1.25459	0.566308	Purifying selection
AsGRAS21	Pepsico1_Contig29889.mrna2	Os11t0500050-00	0.974844	1.04649	0.93154	Purifying selection
AsGRAS21	Pepsico1_Contig29889.mrna2	Os03t0433200-01	0.902987	0.813753	1.10966	Purifying selection
AsGRAS21	Pepsico1_Contig29889.mrna2	Os04t0580300-01	0.86764	1.03198	0.840754	Purifying selection
AsGRAS21	Pepsico1_Contig29889.mrna2	Os04t0555000-01	0.393948	1.66021	0.237288	Purifying selection
AsGRAS21	Pepsico1_Contig29889.mrna2	Os05t0500600-01	1.01948	0.871195	1.17021	Purifying selection
AsGRAS21	Pepsico1_Contig29889.mrna2	Os11t0141500-00	0.868009	0.908423	0.955512	Purifying selection
AsGRAS21	Pepsico1_Contig29889.mrna2	Os07t0583600-01	0.832557	1.50074	0.554764	Purifying selection
AsGRAS21	Pepsico1_Contig29889.mrna2	Os12t0122000-01	0.780134	1.1955	0.652561	Purifying selection
AsGRAS21	Pepsico1_Contig29889.mrna2	Os07t0583600-02	0.832557	1.50074	0.554764	Purifying selection
AsGRAS21	Pepsico1_Contig29889.mrna2	Os07t0583600-03	0.862201	1.27997	0.673609	Purifying selection
AsGRAS21	Pepsico1_Contig29889.mrna2	Os03t0263300-01	0.847466	0.771023	1.09914	Purifying selection
AsGRAS21	Pepsico1_Contig29889.mrna2	Os06t0105350-01	0.453058	0.698563	0.648558	Purifying selection
AsGRAS21	Pepsico1_Contig29889.mrna2	Os04t0432100-00	0.806166	1.00725	0.800361	Purifying selection
AsGRAS21	Pepsico1_Contig29889.mrna2	Os07t0567700-01	0.733288	0.939265	0.780704	Purifying selection
AsGRAS21	Pepsico1_Contig29889.mrna2	Os07t0567700-02	0.744993	0.818469	0.910227	Purifying selection
AsGRAS21	Pepsico1_Contig29889.mrna2	Os12t0138100-00	0.866906	0.8675	0.999315	Purifying selection
AsGRAS21	Pepsico1_Contig29889.mrna2	Os07t0567700-03	1.05488	0.901615	1.16999	Purifying selection
AsGRAS21	Pepsico1_Contig29889.mrna2	Os11t0705900-01	0.954159	0.99499	0.958964	Purifying selection
AsGRAS21	Pepsico1_Contig29889.mrna2	Os02t0197300-00	0.730693	0.721681	1.01249	Purifying selection
AsGRAS21	Pepsico1_Contig29889.mrna2	Os07t0545800-01	0.901356	2.62964	0.342767	Purifying selection
AsGRAS22	Pepsico1_Contig17925.mrna1	Os04t0590400-01	0.869121	2.93151	0.296475	Purifying selection
AsGRAS22	Pepsico1_Contig17925.mrna1	Os03t0103400-01	0.931933	2.20542	0.422565	Purifying selection
AsGRAS22	Pepsico1_Contig17925.mrna1	Os06t0610350-01	0.86655	1.39705	0.620273	Purifying selection
AsGRAS22	Pepsico1_Contig17925.mrna1	Os01t0948200-00	0.93828	1.9716	0.475898	Purifying selection
AsGRAS22	Pepsico1_Contig17925.mrna1	Os11t0705200-01	0.968774	1.83493	0.527963	Purifying selection
AsGRAS22	Pepsico1_Contig17925.mrna1	Os05t0378500-00	1.13008	1.47249	0.767457	Purifying selection
AsGRAS22	Pepsico1_Contig17925.mrna1	Os01t0646300-01	0.721448	2.08451	0.346099	Purifying selection
AsGRAS22	Pepsico1_Contig17925.mrna1	Os07t0589200-00	0.846038	1.59475	0.530515	Purifying selection
AsGRAS22	Pepsico1_Contig17925.mrna1	Os02t0662700-02	0.970508	3.76438	0.257814	Purifying selection
AsGRAS22	Pepsico1_Contig17925.mrna1	Os06t0127800-01	1.02156	1.78581	0.572042	Purifying selection
AsGRAS22	Pepsico1_Contig17925.mrna1	Os02t0662700-01	0.970508	3.76438	0.257814	Purifying selection
AsGRAS22	Pepsico1_Contig17925.mrna1	Os12t0573200-01	0.808612	2.82068	0.286672	Purifying selection
AsGRAS22	Pepsico1_Contig17925.mrna1	Os12t0162700-00	0.869336	2.10504	0.412978	Purifying selection
AsGRAS22	Pepsico1_Contig17925.mrna1	Os05t0574900-01	0.863077	1.50186	0.574672	Purifying selection
AsGRAS22	Pepsico1_Contig17925.mrna1	Os11t0139600-01	0.963017	2.40142	0.40102	Purifying selection
AsGRAS22	Pepsico1_Contig17925.mrna1	Os10t0551200-01	0.768555	1.43515	0.535521	Purifying selection
AsGRAS22	Pepsico1_Contig17925.mrna1	Os03t0408600-01	0.851991	1.70995	0.498255	Purifying selection
AsGRAS22	Pepsico1_Contig17925.mrna1	Os11t0141550-01	0.892777	1.64792	0.54176	Purifying selection
AsGRAS22	Pepsico1_Contig17925.mrna1	Os11t0124300-01	0.871988	1.77443	0.491418	Purifying selection
AsGRAS22	Pepsico1_Contig17925.mrna1	Os07t0586900-01	0.857378	2.85209	0.300614	Purifying selection
AsGRAS22	Pepsico1_Contig17925.mrna1	Os12t0138166-00	0.901464	2.22852	0.404512	Purifying selection
AsGRAS22	Pepsico1_Contig17925.mrna1	Os02t0663100-01	0.82704	2.68367	0.308175	Purifying selection
AsGRAS22	Pepsico1_Contig17925.mrna1	Os03t0723000-01	0.896179	2.69148	0.332969	Purifying selection
AsGRAS22	Pepsico1_Contig17925.mrna1	Os05t0485400-00	0.847726	1.72593	0.491171	Purifying selection
AsGRAS22	Pepsico1_Contig17925.mrna1	Os12t0138200-00	0.811618	2.06832	0.392404	Purifying selection
AsGRAS22	Pepsico1_Contig17925.mrna1	Os05t0378200-00	1.02782	1.98289	0.518343	Purifying selection
AsGRAS22	Pepsico1_Contig17925.mrna1	Os11t0706200-00	0.896967	1.96618	0.456197	Purifying selection
AsGRAS22	Pepsico1_Contig17925.mrna1	Os03t0707600-01	0.82441	1.61815	0.509478	Purifying selection
AsGRAS22	Pepsico1_Contig17925.mrna1	Os02t0681900-01	0.984781	1.5645	0.629454	Purifying selection
AsGRAS22	Pepsico1_Contig17925.mrna1	Os11t0141700-00	0.863023	2.80111	0.308101	Purifying selection
AsGRAS22	Pepsico1_Contig17925.mrna1	Os03t0723000-02	0.896179	2.69148	0.332969	Purifying selection
AsGRAS22	Pepsico1_Contig17925.mrna1	Os11t0500050-00	1.18621	1.77133	0.669674	Purifying selection
AsGRAS22	Pepsico1_Contig17925.mrna1	Os03t0433200-01	0.950671	2.67649	0.355193	Purifying selection
AsGRAS22	Pepsico1_Contig17925.mrna1	Os10t0369600-01	0.4934	1.67695	0.294224	Purifying selection
AsGRAS22	Pepsico1_Contig17925.mrna1	Os04t0580300-01	0.920816	1.61901	0.568753	Purifying selection
AsGRAS22	Pepsico1_Contig17925.mrna1	Os04t0555000-01	0.759012	2.2161	0.3425	Purifying selection
AsGRAS22	Pepsico1_Contig17925.mrna1	Os05t0500600-01	0.880362	1.40944	0.624619	Purifying selection
AsGRAS22	Pepsico1_Contig17925.mrna1	Os11t0141500-00	0.853764	2.17959	0.391709	Purifying selection
AsGRAS22	Pepsico1_Contig17925.mrna1	Os07t0583600-01	0.110553	0.7726	0.143092	Purifying selection
AsGRAS22	Pepsico1_Contig17925.mrna1	Os12t0122000-01	0.891172	1.88829	0.471945	Purifying selection
AsGRAS22	Pepsico1_Contig17925.mrna1	Os07t0583600-02	0.110553	0.7726	0.143092	Purifying selection
AsGRAS22	Pepsico1_Contig17925.mrna1	Os07t0583600-03	0.0786501	0.666669	0.117975	Purifying selection
AsGRAS22	Pepsico1_Contig17925.mrna1	Os03t0263300-01	0.870493	1.54542	0.563272	Purifying selection
AsGRAS22	Pepsico1_Contig17925.mrna1	Os06t0105350-01	0.980591	1.72628	0.568037	Purifying selection
AsGRAS22	Pepsico1_Contig17925.mrna1	Os04t0432100-00	0.760143	1.18036	0.643994	Purifying selection
AsGRAS22	Pepsico1_Contig17925.mrna1	Os03t0193000-01	0.419233	3.31413	0.126499	Purifying selection
AsGRAS22	Pepsico1_Contig17925.mrna1	Os07t0567700-01	1.00783	1.61326	0.624719	Purifying selection
AsGRAS22	Pepsico1_Contig17925.mrna1	Os07t0567700-02	0.852399	1.3141	0.648654	Purifying selection
AsGRAS22	Pepsico1_Contig17925.mrna1	Os12t0138100-00	0.853076	2.063	0.413513	Purifying selection
AsGRAS22	Pepsico1_Contig17925.mrna1	Os01t0842200-01	1.13253	2.91362	0.388701	Purifying selection
AsGRAS22	Pepsico1_Contig17925.mrna1	Os11t0705900-01	0.996051	1.92655	0.517014	Purifying selection
AsGRAS22	Pepsico1_Contig17925.mrna1	Os02t0197300-00	0.819305	1.81108	0.452385	Purifying selection
AsGRAS22	Pepsico1_Contig17925.mrna1	Os01t0842200-02	1.13253	2.91362	0.388701	Purifying selection
AsGRAS23	Pepsico2_Contig10379.mrna3	Os06t0211500-00	0.587312	1.34646	0.436191	Purifying selection
AsGRAS23	Pepsico2_Contig10379.mrna3	Os03t0103400-01	0.905535	2.14722	0.421725	Purifying selection
AsGRAS23	Pepsico2_Contig10379.mrna3	Os06t0610350-01	0.806461	4.09524	0.196926	Purifying selection
AsGRAS23	Pepsico2_Contig10379.mrna3	Os05t0378500-00	0.896137	2.46712	0.363232	Purifying selection
AsGRAS23	Pepsico2_Contig10379.mrna3	Os10t0551200-01	0.889005	1.78551	0.497899	Purifying selection
AsGRAS23	Pepsico2_Contig10379.mrna3	Os11t0141550-01	0.791043	3.20061	0.247154	Purifying selection
AsGRAS23	Pepsico2_Contig10379.mrna3	Os12t0138166-00	0.787624	2.97772	0.264506	Purifying selection
AsGRAS23	Pepsico2_Contig10379.mrna3	Os05t0485400-00	0.729224	4.13415	0.17639	Purifying selection
AsGRAS23	Pepsico2_Contig10379.mrna3	Os12t0138200-00	0.788906	2.62054	0.301047	Purifying selection
AsGRAS23	Pepsico2_Contig10379.mrna3	Os05t0378200-00	0.796612	2.77917	0.286636	Purifying selection
AsGRAS23	Pepsico2_Contig10379.mrna3	Os03t0707600-01	0.717286	2.27318	0.315543	Purifying selection
AsGRAS23	Pepsico2_Contig10379.mrna3	Os11t0141700-00	0.802272	2.28975	0.350376	Purifying selection
AsGRAS23	Pepsico2_Contig10379.mrna3	Os11t0500050-00	0.898763	1.45685	0.616924	Purifying selection
AsGRAS23	Pepsico2_Contig10379.mrna3	Os10t0369600-01	0.742912	3.47766	0.213624	Purifying selection
AsGRAS23	Pepsico2_Contig10379.mrna3	Os04t0580300-01	0.812621	2.79265	0.290985	Purifying selection
AsGRAS23	Pepsico2_Contig10379.mrna3	Os05t0500600-01	0.880285	2.46268	0.357449	Purifying selection
AsGRAS23	Pepsico2_Contig10379.mrna3	Os11t0141500-00	0.744361	2.8002	0.265825	Purifying selection
AsGRAS23	Pepsico2_Contig10379.mrna3	Os07t0583600-01	0.426007	3.92653	0.108494	Purifying selection
AsGRAS23	Pepsico2_Contig10379.mrna3	Os07t0583600-02	0.426007	3.92653	0.108494	Purifying selection
AsGRAS23	Pepsico2_Contig10379.mrna3	Os07t0583600-03	0.262604	2.06588	0.127115	Purifying selection
AsGRAS23	Pepsico2_Contig10379.mrna3	Os04t0432100-00	0.92914	2.00962	0.462346	Purifying selection
AsGRAS23	Pepsico2_Contig10379.mrna3	Os07t0567700-01	0.68093	1.58103	0.430687	Purifying selection
AsGRAS23	Pepsico2_Contig10379.mrna3	Os07t0567700-02	0.744306	4.11333	0.18095	Purifying selection
AsGRAS23	Pepsico2_Contig10379.mrna3	Os12t0138100-00	0.7504	2.83254	0.264922	Purifying selection
AsGRAS23	Pepsico2_Contig10379.mrna3	Os01t0842200-01	0.880378	2.29118	0.384246	Purifying selection
AsGRAS23	Pepsico2_Contig10379.mrna3	Os01t0842200-02	0.880378	2.29118	0.384246	Purifying selection
AsGRAS23	Pepsico2_Contig10379.mrna3	Os07t0545800-01	0.055073	0.529692	0.103972	Purifying selection
AsGRAS24	Pepsico1_Contig36247.mrna1	Os04t0590400-01	0.914749	2.87374	0.318313	Purifying selection
AsGRAS24	Pepsico1_Contig36247.mrna1	Os06t0211500-00	1.04349	1.40056	0.745053	Purifying selection
AsGRAS24	Pepsico1_Contig36247.mrna1	Os03t0103400-01	1.0507	2.26091	0.464722	Purifying selection
AsGRAS24	Pepsico1_Contig36247.mrna1	Os06t0610350-01	1.03669	1.37628	0.753253	Purifying selection
AsGRAS24	Pepsico1_Contig36247.mrna1	Os01t0948200-00	1.0895	2.67251	0.40767	Purifying selection
AsGRAS24	Pepsico1_Contig36247.mrna1	Os11t0705200-01	1.02955	1.92723	0.534211	Purifying selection
AsGRAS24	Pepsico1_Contig36247.mrna1	Os05t0378500-00	1.23487	1.7761	0.695271	Purifying selection
AsGRAS24	Pepsico1_Contig36247.mrna1	Os03t0690600-03	0.910619	1.79495	0.507322	Purifying selection
AsGRAS24	Pepsico1_Contig36247.mrna1	Os01t0646300-01	0.822049	1.69051	0.486273	Purifying selection
AsGRAS24	Pepsico1_Contig36247.mrna1	Os07t0589200-00	0.955022	1.92092	0.49717	Purifying selection
AsGRAS24	Pepsico1_Contig36247.mrna1	Os02t0662700-02	1.00704	3.46955	0.290252	Purifying selection
AsGRAS24	Pepsico1_Contig36247.mrna1	Os03t0690600-01	0.910619	1.79495	0.507322	Purifying selection
AsGRAS24	Pepsico1_Contig36247.mrna1	Os06t0127800-01	1.06533	1.86155	0.572281	Purifying selection
AsGRAS24	Pepsico1_Contig36247.mrna1	Os02t0662700-01	1.00704	3.46955	0.290252	Purifying selection
AsGRAS24	Pepsico1_Contig36247.mrna1	Os03t0690600-02	0.910619	1.79495	0.507322	Purifying selection
AsGRAS24	Pepsico1_Contig36247.mrna1	Os12t0573200-01	0.853807	3.32029	0.257149	Purifying selection
AsGRAS24	Pepsico1_Contig36247.mrna1	Os12t0162700-00	0.94026	6.02622	0.156028	Purifying selection
AsGRAS24	Pepsico1_Contig36247.mrna1	Os05t0574900-01	1.08444	1.58432	0.684483	Purifying selection
AsGRAS24	Pepsico1_Contig36247.mrna1	Os11t0139600-01	1.07004	2.15695	0.496091	Purifying selection
AsGRAS24	Pepsico1_Contig36247.mrna1	Os10t0551200-01	0.890472	1.47995	0.601689	Purifying selection
AsGRAS24	Pepsico1_Contig36247.mrna1	Os03t0408600-01	0.964455	1.77775	0.542514	Purifying selection
AsGRAS24	Pepsico1_Contig36247.mrna1	Os11t0141550-01	1.0246	1.89572	0.540482	Purifying selection
AsGRAS24	Pepsico1_Contig36247.mrna1	Os11t0124300-01	1.03886	2.11962	0.490116	Purifying selection
AsGRAS24	Pepsico1_Contig36247.mrna1	Os07t0586900-01	0.918898	2.24651	0.409033	Purifying selection
AsGRAS24	Pepsico1_Contig36247.mrna1	Os12t0138166-00	0.99192	2.59145	0.382767	Purifying selection
AsGRAS24	Pepsico1_Contig36247.mrna1	Os02t0663100-01	0.864394	2.60988	0.3312	Purifying selection
AsGRAS24	Pepsico1_Contig36247.mrna1	Os03t0723000-01	0.968691	2.69354	0.359635	Purifying selection
AsGRAS24	Pepsico1_Contig36247.mrna1	Os05t0485400-00	0.940747	1.76431	0.533209	Purifying selection
AsGRAS24	Pepsico1_Contig36247.mrna1	Os12t0138200-00	0.966927	1.79401	0.538975	Purifying selection
AsGRAS24	Pepsico1_Contig36247.mrna1	Os05t0378200-00	1.25909	2.14474	0.587061	Purifying selection
AsGRAS24	Pepsico1_Contig36247.mrna1	Os11t0706200-00	0.923076	1.69653	0.544096	Purifying selection
AsGRAS24	Pepsico1_Contig36247.mrna1	Os03t0707600-01	0.9062	1.84978	0.489896	Purifying selection
AsGRAS24	Pepsico1_Contig36247.mrna1	Os02t0681900-01	1.10726	1.59997	0.692053	Purifying selection
AsGRAS24	Pepsico1_Contig36247.mrna1	Os11t0160550-00	0.969271	3.62055	0.267714	Purifying selection
AsGRAS24	Pepsico1_Contig36247.mrna1	Os03t0723000-02	0.968691	2.69354	0.359635	Purifying selection
AsGRAS24	Pepsico1_Contig36247.mrna1	Os11t0500050-00	0.799549	0.854205	0.936015	Purifying selection
AsGRAS24	Pepsico1_Contig36247.mrna1	Os03t0433200-01	0.980903	2.41828	0.40562	Purifying selection
AsGRAS24	Pepsico1_Contig36247.mrna1	Os10t0369600-01	0.4934	1.67695	0.294224	Purifying selection
AsGRAS24	Pepsico1_Contig36247.mrna1	Os04t0580300-01	0.975205	2.27549	0.42857	Purifying selection
AsGRAS24	Pepsico1_Contig36247.mrna1	Os04t0555000-01	0.80368	1.85184	0.43399	Purifying selection
AsGRAS24	Pepsico1_Contig36247.mrna1	Os05t0500600-01	1.00341	1.42396	0.704658	Purifying selection
AsGRAS24	Pepsico1_Contig36247.mrna1	Os11t0141500-00	0.994913	2.06274	0.482325	Purifying selection
AsGRAS24	Pepsico1_Contig36247.mrna1	Os07t0583600-01	0.115874	0.74325	0.155901	Purifying selection
AsGRAS24	Pepsico1_Contig36247.mrna1	Os12t0122000-01	1.04227	2.25717	0.461759	Purifying selection
AsGRAS24	Pepsico1_Contig36247.mrna1	Os07t0583600-02	0.115874	0.74325	0.155901	Purifying selection
AsGRAS24	Pepsico1_Contig36247.mrna1	Os07t0583600-03	0.077852	0.519002	0.150003	Purifying selection
AsGRAS24	Pepsico1_Contig36247.mrna1	Os03t0263300-01	1.00419	1.65811	0.605625	Purifying selection
AsGRAS24	Pepsico1_Contig36247.mrna1	Os06t0105350-01	0.929919	2.25156	0.413012	Purifying selection
AsGRAS24	Pepsico1_Contig36247.mrna1	Os04t0432100-00	0.940924	1.30214	0.722597	Purifying selection
AsGRAS24	Pepsico1_Contig36247.mrna1	Os03t0193000-01	0.47167	2.0318	0.232144	Purifying selection
AsGRAS24	Pepsico1_Contig36247.mrna1	Os07t0567700-01	0.934308	1.11242	0.839889	Purifying selection
AsGRAS24	Pepsico1_Contig36247.mrna1	Os07t0567700-02	1.01601	1.32744	0.765391	Purifying selection
AsGRAS24	Pepsico1_Contig36247.mrna1	Os12t0138100-00	1.06769	1.57997	0.675764	Purifying selection
AsGRAS24	Pepsico1_Contig36247.mrna1	Os01t0842200-01	1.22301	1.96826	0.621366	Purifying selection
AsGRAS24	Pepsico1_Contig36247.mrna1	Os11t0705900-01	1.05961	2.24262	0.472486	Purifying selection
AsGRAS24	Pepsico1_Contig36247.mrna1	Os02t0197300-00	1.07882	1.59206	0.677625	Purifying selection
AsGRAS24	Pepsico1_Contig36247.mrna1	Os01t0842200-02	1.22301	1.96826	0.621366	Purifying selection
AsGRAS25	Pepsico1_Contig17438.mrna1	Os06t0211500-00	0.673131	0.768422	0.875991	Purifying selection
AsGRAS25	Pepsico1_Contig17438.mrna1	Os03t0103400-01	0.807058	1.29991	0.620854	Purifying selection
AsGRAS25	Pepsico1_Contig17438.mrna1	Os06t0610350-01	0.786612	0.9994	0.787084	Purifying selection
AsGRAS25	Pepsico1_Contig17438.mrna1	Os01t0948200-00	0.740138	0.796823	0.928861	Purifying selection
AsGRAS25	Pepsico1_Contig17438.mrna1	Os11t0705200-01	0.870187	1.01165	0.860162	Purifying selection
AsGRAS25	Pepsico1_Contig17438.mrna1	Os05t0378500-00	0.80955	1.09918	0.736505	Purifying selection
AsGRAS25	Pepsico1_Contig17438.mrna1	Os01t0646300-01	0.778262	1.17906	0.660071	Purifying selection
AsGRAS25	Pepsico1_Contig17438.mrna1	Os07t0589200-00	0.796898	0.870236	0.915726	Purifying selection
AsGRAS25	Pepsico1_Contig17438.mrna1	Os02t0662700-02	0.805463	2.40461	0.334966	Purifying selection
AsGRAS25	Pepsico1_Contig17438.mrna1	Os06t0127800-01	0.794652	0.959025	0.828604	Purifying selection
AsGRAS25	Pepsico1_Contig17438.mrna1	Os02t0662700-01	0.815211	1.97176	0.413443	Purifying selection
AsGRAS25	Pepsico1_Contig17438.mrna1	Os12t0573200-01	0.944997	1.34382	0.703217	Purifying selection
AsGRAS25	Pepsico1_Contig17438.mrna1	Os12t0162700-00	0.868383	1.70417	0.509564	Purifying selection
AsGRAS25	Pepsico1_Contig17438.mrna1	Os05t0574900-01	0.81498	1.02872	0.792224	Purifying selection
AsGRAS25	Pepsico1_Contig17438.mrna1	Os11t0139600-01	0.924315	1.45503	0.635256	Purifying selection
AsGRAS25	Pepsico1_Contig17438.mrna1	Os10t0551200-01	0.823804	0.96217	0.856194	Purifying selection
AsGRAS25	Pepsico1_Contig17438.mrna1	Os03t0408600-01	0.793131	1.00626	0.788199	Purifying selection
AsGRAS25	Pepsico1_Contig17438.mrna1	Os11t0141550-01	1.1779	2.62513	0.448703	Purifying selection
AsGRAS25	Pepsico1_Contig17438.mrna1	Os11t0124300-01	0.753519	1.21978	0.617752	Purifying selection
AsGRAS25	Pepsico1_Contig17438.mrna1	Os07t0586900-01	0.894594	0.940724	0.950963	Purifying selection
AsGRAS25	Pepsico1_Contig17438.mrna1	Os12t0138166-00	0.84655	3.69999	0.228798	Purifying selection
AsGRAS25	Pepsico1_Contig17438.mrna1	Os02t0663100-01	0.832461	2.19532	0.379198	Purifying selection
AsGRAS25	Pepsico1_Contig17438.mrna1	Os03t0723000-01	0.733303	1.2457	0.588669	Purifying selection
AsGRAS25	Pepsico1_Contig17438.mrna1	Os05t0485400-00	0.834642	0.988072	0.844717	Purifying selection
AsGRAS25	Pepsico1_Contig17438.mrna1	Os12t0138200-00	0.771816	1.0621	0.72669	Purifying selection
AsGRAS25	Pepsico1_Contig17438.mrna1	Os05t0378200-00	0.714937	0.886309	0.806646	Purifying selection
AsGRAS25	Pepsico1_Contig17438.mrna1	Os11t0706200-00	0.919136	1.82205	0.504451	Purifying selection
AsGRAS25	Pepsico1_Contig17438.mrna1	Os03t0707600-01	0.752265	1.04735	0.718257	Purifying selection
AsGRAS25	Pepsico1_Contig17438.mrna1	Os02t0681900-01	0.205863	0.729817	0.282074	Purifying selection
AsGRAS25	Pepsico1_Contig17438.mrna1	Os11t0141700-00	0.75684	0.998072	0.758302	Purifying selection
AsGRAS25	Pepsico1_Contig17438.mrna1	Os03t0723000-02	0.733303	1.2457	0.588669	Purifying selection
AsGRAS25	Pepsico1_Contig17438.mrna1	Os11t0500050-00	0.641588	1.15788	0.554106	Purifying selection
AsGRAS25	Pepsico1_Contig17438.mrna1	Os03t0433200-01	0.797879	0.989905	0.806015	Purifying selection
AsGRAS25	Pepsico1_Contig17438.mrna1	Os04t0580300-01	0.148234	0.529592	0.279902	Purifying selection
AsGRAS25	Pepsico1_Contig17438.mrna1	Os04t0555000-01	0.872221	1.6412	0.531454	Purifying selection
AsGRAS25	Pepsico1_Contig17438.mrna1	Os05t0500600-01	0.838238	0.82521	1.01579	Purifying selection
AsGRAS25	Pepsico1_Contig17438.mrna1	Os11t0141500-00	0.757882	0.962621	0.78731	Purifying selection
AsGRAS25	Pepsico1_Contig17438.mrna1	Os07t0583600-01	0.798017	2.22444	0.35875	Purifying selection
AsGRAS25	Pepsico1_Contig17438.mrna1	Os12t0122000-01	0.764864	1.03782	0.736991	Purifying selection
AsGRAS25	Pepsico1_Contig17438.mrna1	Os07t0583600-02	0.798017	2.22444	0.35875	Purifying selection
AsGRAS25	Pepsico1_Contig17438.mrna1	Os07t0583600-03	0.716136	1.50253	0.476621	Purifying selection
AsGRAS25	Pepsico1_Contig17438.mrna1	Os03t0263300-01	0.84496	1.02465	0.824635	Purifying selection
AsGRAS25	Pepsico1_Contig17438.mrna1	Os06t0105350-01	0.880971	1.12462	0.783349	Purifying selection
AsGRAS25	Pepsico1_Contig17438.mrna1	Os04t0432100-00	0.905749	1.0401	0.87083	Purifying selection
AsGRAS25	Pepsico1_Contig17438.mrna1	Os07t0567700-01	0.654027	1.13476	0.576355	Purifying selection
AsGRAS25	Pepsico1_Contig17438.mrna1	Os07t0567700-02	0.852669	1.01278	0.841909	Purifying selection
AsGRAS25	Pepsico1_Contig17438.mrna1	Os12t0138100-00	0.75756	0.952526	0.795317	Purifying selection
AsGRAS25	Pepsico1_Contig17438.mrna1	Os01t0842200-01	1.00593	3.75889	0.267614	Purifying selection
AsGRAS25	Pepsico1_Contig17438.mrna1	Os07t0567700-03	0.710105	1.17712	0.603257	Purifying selection
AsGRAS25	Pepsico1_Contig17438.mrna1	Os11t0705900-01	0.886165	1.06585	0.831415	Purifying selection
AsGRAS25	Pepsico1_Contig17438.mrna1	Os02t0197300-00	0.838435	1.2343	0.679282	Purifying selection
AsGRAS25	Pepsico1_Contig17438.mrna1	Os01t0842200-02	1.00593	3.75889	0.267614	Purifying selection
AsGRAS26	Pepsico2_Contig1385.mrna1	Os06t0211500-00	0.587312	1.34646	0.436191	Purifying selection
AsGRAS26	Pepsico2_Contig1385.mrna1	Os03t0103400-01	0.905535	2.14722	0.421725	Purifying selection
AsGRAS26	Pepsico2_Contig1385.mrna1	Os06t0610350-01	0.806461	4.09524	0.196926	Purifying selection
AsGRAS26	Pepsico2_Contig1385.mrna1	Os05t0378500-00	0.896137	2.46712	0.363232	Purifying selection
AsGRAS26	Pepsico2_Contig1385.mrna1	Os10t0551200-01	0.889005	1.78551	0.497899	Purifying selection
AsGRAS26	Pepsico2_Contig1385.mrna1	Os11t0141550-01	0.791043	3.20061	0.247154	Purifying selection
AsGRAS26	Pepsico2_Contig1385.mrna1	Os12t0138166-00	0.787624	2.97772	0.264506	Purifying selection
AsGRAS26	Pepsico2_Contig1385.mrna1	Os05t0485400-00	0.729224	4.13415	0.17639	Purifying selection
AsGRAS26	Pepsico2_Contig1385.mrna1	Os12t0138200-00	0.788906	2.62054	0.301047	Purifying selection
AsGRAS26	Pepsico2_Contig1385.mrna1	Os05t0378200-00	0.796612	2.77917	0.286636	Purifying selection
AsGRAS26	Pepsico2_Contig1385.mrna1	Os03t0707600-01	0.717286	2.27318	0.315543	Purifying selection
AsGRAS26	Pepsico2_Contig1385.mrna1	Os11t0141700-00	0.802272	2.28975	0.350376	Purifying selection
AsGRAS26	Pepsico2_Contig1385.mrna1	Os11t0500050-00	0.898763	1.45685	0.616924	Purifying selection
AsGRAS26	Pepsico2_Contig1385.mrna1	Os10t0369600-01	0.742912	3.47766	0.213624	Purifying selection
AsGRAS26	Pepsico2_Contig1385.mrna1	Os04t0580300-01	0.812621	2.79265	0.290985	Purifying selection
AsGRAS26	Pepsico2_Contig1385.mrna1	Os05t0500600-01	0.880285	2.46268	0.357449	Purifying selection
AsGRAS26	Pepsico2_Contig1385.mrna1	Os11t0141500-00	0.744361	2.8002	0.265825	Purifying selection
AsGRAS26	Pepsico2_Contig1385.mrna1	Os07t0583600-01	0.426007	3.92653	0.108494	Purifying selection
AsGRAS26	Pepsico2_Contig1385.mrna1	Os07t0583600-02	0.426007	3.92653	0.108494	Purifying selection
AsGRAS26	Pepsico2_Contig1385.mrna1	Os07t0583600-03	0.262604	2.06588	0.127115	Purifying selection
AsGRAS26	Pepsico2_Contig1385.mrna1	Os04t0432100-00	0.92914	2.00962	0.462346	Purifying selection
AsGRAS26	Pepsico2_Contig1385.mrna1	Os07t0567700-01	0.68093	1.58103	0.430687	Purifying selection
AsGRAS26	Pepsico2_Contig1385.mrna1	Os07t0567700-02	0.744306	4.11333	0.18095	Purifying selection
AsGRAS26	Pepsico2_Contig1385.mrna1	Os12t0138100-00	0.7504	2.83254	0.264922	Purifying selection
AsGRAS26	Pepsico2_Contig1385.mrna1	Os01t0842200-01	0.880378	2.29118	0.384246	Purifying selection
AsGRAS26	Pepsico2_Contig1385.mrna1	Os01t0842200-02	0.880378	2.29118	0.384246	Purifying selection
AsGRAS26	Pepsico2_Contig1385.mrna1	Os07t0545800-01	0.055073	0.529692	0.103972	Purifying selection
AsGRAS27	Pepsico2_Contig8490.mrna1	Os04t0590400-01	0.714646	3.68091	0.194149	Purifying selection
AsGRAS27	Pepsico2_Contig8490.mrna1	Os06t0211500-00	0.541641	0.764058	0.708901	Purifying selection
AsGRAS27	Pepsico2_Contig8490.mrna1	Os03t0103400-01	0.776217	0.718128	1.08089	Purifying selection
AsGRAS27	Pepsico2_Contig8490.mrna1	Os06t0610350-01	0.624389	0.602335	1.03661	Purifying selection
AsGRAS27	Pepsico2_Contig8490.mrna1	Os01t0948200-00	0.704159	0.661496	1.06449	Purifying selection
AsGRAS27	Pepsico2_Contig8490.mrna1	Os11t0705200-01	0.842231	0.824332	1.02171	Purifying selection
AsGRAS27	Pepsico2_Contig8490.mrna1	Os05t0378500-00	0.815493	0.57411	1.42045	Purifying selection
AsGRAS27	Pepsico2_Contig8490.mrna1	Os01t0646300-01	0.601081	0.793284	0.757711	Purifying selection
AsGRAS27	Pepsico2_Contig8490.mrna1	Os07t0589200-00	0.778499	0.635561	1.2249	Purifying selection
AsGRAS27	Pepsico2_Contig8490.mrna1	Os02t0662700-02	0.806581	1.6538	0.487714	Purifying selection
AsGRAS27	Pepsico2_Contig8490.mrna1	Os06t0127800-01	0.735104	0.66957	1.09787	Purifying selection
AsGRAS27	Pepsico2_Contig8490.mrna1	Os02t0662700-01	0.806581	1.6538	0.487714	Purifying selection
AsGRAS27	Pepsico2_Contig8490.mrna1	Os12t0573200-01	0.810909	1.40485	0.577223	Purifying selection
AsGRAS27	Pepsico2_Contig8490.mrna1	Os12t0162700-00	0.788516	1.28339	0.614401	Purifying selection
AsGRAS27	Pepsico2_Contig8490.mrna1	Os05t0574900-01	0.62666	0.686108	0.913355	Purifying selection
AsGRAS27	Pepsico2_Contig8490.mrna1	Os11t0139600-01	0.742844	1.18596	0.626364	Purifying selection
AsGRAS27	Pepsico2_Contig8490.mrna1	Os10t0551200-01	0.747301	0.758525	0.985203	Purifying selection
AsGRAS27	Pepsico2_Contig8490.mrna1	Os03t0408600-01	0.671064	0.696561	0.963396	Purifying selection
AsGRAS27	Pepsico2_Contig8490.mrna1	Os11t0141550-01	0.906717	1.32435	0.684648	Purifying selection
AsGRAS27	Pepsico2_Contig8490.mrna1	Os11t0124300-01	0.392739	0.932447	0.421192	Purifying selection
AsGRAS27	Pepsico2_Contig8490.mrna1	Os07t0586900-01	0.742928	0.721878	1.02916	Purifying selection
AsGRAS27	Pepsico2_Contig8490.mrna1	Os12t0138166-00	0.731261	3.08098	0.237347	Purifying selection
AsGRAS27	Pepsico2_Contig8490.mrna1	Os02t0663100-01	0.781057	1.71049	0.456627	Purifying selection
AsGRAS27	Pepsico2_Contig8490.mrna1	Os03t0723000-01	0.725766	1.17811	0.616042	Purifying selection
AsGRAS27	Pepsico2_Contig8490.mrna1	Os05t0485400-00	0.55579	0.60829	0.913692	Purifying selection
AsGRAS27	Pepsico2_Contig8490.mrna1	Os12t0138200-00	0.801463	0.871481	0.919657	Purifying selection
AsGRAS27	Pepsico2_Contig8490.mrna1	Os05t0378200-00	0.741232	0.671538	1.10378	Purifying selection
AsGRAS27	Pepsico2_Contig8490.mrna1	Os11t0706200-00	0.836385	1.16777	0.716222	Purifying selection
AsGRAS27	Pepsico2_Contig8490.mrna1	Os03t0707600-01	0.607257	0.682205	0.890138	Purifying selection
AsGRAS27	Pepsico2_Contig8490.mrna1	Os02t0681900-01	0.895434	0.771058	1.16131	Purifying selection
AsGRAS27	Pepsico2_Contig8490.mrna1	Os11t0141700-00	0.807679	0.893896	0.903549	Purifying selection
AsGRAS27	Pepsico2_Contig8490.mrna1	Os03t0723000-02	0.725766	1.17811	0.616042	Purifying selection
AsGRAS27	Pepsico2_Contig8490.mrna1	Os11t0500050-00	0.801966	1.22836	0.652877	Purifying selection
AsGRAS27	Pepsico2_Contig8490.mrna1	Os03t0433200-01	0.768826	0.663002	1.15961	Purifying selection
AsGRAS27	Pepsico2_Contig8490.mrna1	Os04t0580300-01	0.886544	0.819477	1.08184	Purifying selection
AsGRAS27	Pepsico2_Contig8490.mrna1	Os04t0555000-01	0.848286	1.57635	0.538135	Purifying selection
AsGRAS27	Pepsico2_Contig8490.mrna1	Os05t0500600-01	0.803993	0.788351	1.01984	Purifying selection
AsGRAS27	Pepsico2_Contig8490.mrna1	Os11t0141500-00	0.744658	0.455463	1.63495	Purifying selection
AsGRAS27	Pepsico2_Contig8490.mrna1	Os07t0583600-01	0.677215	1.51879	0.44589	Purifying selection
AsGRAS27	Pepsico2_Contig8490.mrna1	Os12t0122000-01	0.389825	0.918506	0.424412	Purifying selection
AsGRAS27	Pepsico2_Contig8490.mrna1	Os07t0583600-02	0.677215	1.51879	0.44589	Purifying selection
AsGRAS27	Pepsico2_Contig8490.mrna1	Os07t0583600-03	0.63909	1.26929	0.503502	Purifying selection
AsGRAS27	Pepsico2_Contig8490.mrna1	Os03t0263300-01	0.71379	0.878564	0.81245	Purifying selection
AsGRAS27	Pepsico2_Contig8490.mrna1	Os06t0105350-01	0.82704	0.796647	1.03815	Purifying selection
AsGRAS27	Pepsico2_Contig8490.mrna1	Os04t0432100-00	0.699311	0.86264	0.810664	Purifying selection
AsGRAS27	Pepsico2_Contig8490.mrna1	Os07t0567700-01	0.156364	0.48884	0.319868	Purifying selection
AsGRAS27	Pepsico2_Contig8490.mrna1	Os07t0567700-02	0.0792754	0.316077	0.250811	Purifying selection
AsGRAS27	Pepsico2_Contig8490.mrna1	Os12t0138100-00	0.739541	0.458946	1.61139	Purifying selection
AsGRAS27	Pepsico2_Contig8490.mrna1	Os01t0842200-01	0.860912	2.95656	0.291187	Purifying selection
AsGRAS27	Pepsico2_Contig8490.mrna1	Os07t0567700-03	0.107999	0.472333	0.228649	Purifying selection
AsGRAS27	Pepsico2_Contig8490.mrna1	Os11t0705900-01	0.681625	0.745421	0.914415	Purifying selection
AsGRAS27	Pepsico2_Contig8490.mrna1	Os02t0197300-00	0.593733	0.699776	0.848461	Purifying selection
AsGRAS27	Pepsico2_Contig8490.mrna1	Os01t0842200-02	0.860912	2.95656	0.291187	Purifying selection
AsGRAS27	Pepsico2_Contig8490.mrna1	Os07t0545800-01	0.785108	1.76363	0.445166	Purifying selection
AsGRAS28	Pepsico2_Contig1385.mrna2	Os06t0211500-00	0.574344	1.26795	0.452971	Purifying selection
AsGRAS28	Pepsico2_Contig1385.mrna2	Os03t0103400-01	0.900766	2.21963	0.405818	Purifying selection
AsGRAS28	Pepsico2_Contig1385.mrna2	Os06t0610350-01	0.764558	3.59656	0.21258	Purifying selection
AsGRAS28	Pepsico2_Contig1385.mrna2	Os11t0705200-01	0.907612	3.25208	0.279086	Purifying selection
AsGRAS28	Pepsico2_Contig1385.mrna2	Os05t0378500-00	0.905004	2.90544	0.311486	Purifying selection
AsGRAS28	Pepsico2_Contig1385.mrna2	Os03t0690600-03	0.97644	5.1204	0.190696	Purifying selection
AsGRAS28	Pepsico2_Contig1385.mrna2	Os07t0589200-00	0.814975	3.28245	0.248283	Purifying selection
AsGRAS28	Pepsico2_Contig1385.mrna2	Os03t0690600-01	0.97644	5.1204	0.190696	Purifying selection
AsGRAS28	Pepsico2_Contig1385.mrna2	Os03t0690600-02	0.97644	5.1204	0.190696	Purifying selection
AsGRAS28	Pepsico2_Contig1385.mrna2	Os10t0551200-01	0.916894	1.75498	0.522453	Purifying selection
AsGRAS28	Pepsico2_Contig1385.mrna2	Os03t0408600-01	0.867204	3.57473	0.242593	Purifying selection
AsGRAS28	Pepsico2_Contig1385.mrna2	Os11t0141550-01	0.796472	2.41723	0.329498	Purifying selection
AsGRAS28	Pepsico2_Contig1385.mrna2	Os07t0586900-01	0.934035	5.34055	0.174895	Purifying selection
AsGRAS28	Pepsico2_Contig1385.mrna2	Os12t0138166-00	0.801458	2.52906	0.316899	Purifying selection
AsGRAS28	Pepsico2_Contig1385.mrna2	Os05t0485400-00	0.734317	4.79552	0.153125	Purifying selection
AsGRAS28	Pepsico2_Contig1385.mrna2	Os12t0138200-00	0.796985	2.62696	0.303387	Purifying selection
AsGRAS28	Pepsico2_Contig1385.mrna2	Os05t0378200-00	0.78522	3.11226	0.252299	Purifying selection
AsGRAS28	Pepsico2_Contig1385.mrna2	Os11t0706200-00	0.823641	4.81935	0.170903	Purifying selection
AsGRAS28	Pepsico2_Contig1385.mrna2	Os03t0707600-01	0.748047	2.63799	0.283567	Purifying selection
AsGRAS28	Pepsico2_Contig1385.mrna2	Os11t0141700-00	0.802787	2.40494	0.333808	Purifying selection
AsGRAS28	Pepsico2_Contig1385.mrna2	Os11t0500050-00	0.842979	2.01811	0.417708	Purifying selection
AsGRAS28	Pepsico2_Contig1385.mrna2	Os04t0580300-01	0.78571	2.51932	0.311873	Purifying selection
AsGRAS28	Pepsico2_Contig1385.mrna2	Os05t0500600-01	0.853436	2.4662	0.346053	Purifying selection
AsGRAS28	Pepsico2_Contig1385.mrna2	Os11t0141500-00	0.753938	2.33214	0.323282	Purifying selection
AsGRAS28	Pepsico2_Contig1385.mrna2	Os07t0583600-01	0.411475	2.79288	0.14733	Purifying selection
AsGRAS28	Pepsico2_Contig1385.mrna2	Os07t0583600-02	0.411475	2.79288	0.14733	Purifying selection
AsGRAS28	Pepsico2_Contig1385.mrna2	Os07t0583600-03	0.259235	2.24447	0.115499	Purifying selection
AsGRAS28	Pepsico2_Contig1385.mrna2	Os03t0263300-01	0.827408	2.446	0.33827	Purifying selection
AsGRAS28	Pepsico2_Contig1385.mrna2	Os04t0432100-00	0.917061	1.87913	0.488025	Purifying selection
AsGRAS28	Pepsico2_Contig1385.mrna2	Os07t0567700-01	0.680333	1.63665	0.415686	Purifying selection
AsGRAS28	Pepsico2_Contig1385.mrna2	Os12t0138100-00	0.759941	2.34804	0.323649	Purifying selection
AsGRAS28	Pepsico2_Contig1385.mrna2	Os01t0842200-01	0.891112	2.92581	0.304569	Purifying selection
AsGRAS28	Pepsico2_Contig1385.mrna2	Os11t0705900-01	0.839971	2.32528	0.361234	Purifying selection
AsGRAS28	Pepsico2_Contig1385.mrna2	Os01t0842200-02	0.891112	2.92581	0.304569	Purifying selection
AsGRAS28	Pepsico2_Contig1385.mrna2	Os07t0545800-01	0.0490427	0.53246	0.0921057	Purifying selection
AsGRAS29	Pepsico2_Contig10379.mrna1	Os06t0211500-00	0.574344	1.26795	0.452971	Purifying selection
AsGRAS29	Pepsico2_Contig10379.mrna1	Os03t0103400-01	0.900766	2.21963	0.405818	Purifying selection
AsGRAS29	Pepsico2_Contig10379.mrna1	Os06t0610350-01	0.764558	3.59656	0.21258	Purifying selection
AsGRAS29	Pepsico2_Contig10379.mrna1	Os11t0705200-01	0.907612	3.25208	0.279086	Purifying selection
AsGRAS29	Pepsico2_Contig10379.mrna1	Os05t0378500-00	0.905004	2.90544	0.311486	Purifying selection
AsGRAS29	Pepsico2_Contig10379.mrna1	Os03t0690600-03	0.97644	5.1204	0.190696	Purifying selection
AsGRAS29	Pepsico2_Contig10379.mrna1	Os07t0589200-00	0.814975	3.28245	0.248283	Purifying selection
AsGRAS29	Pepsico2_Contig10379.mrna1	Os03t0690600-01	0.97644	5.1204	0.190696	Purifying selection
AsGRAS29	Pepsico2_Contig10379.mrna1	Os03t0690600-02	0.97644	5.1204	0.190696	Purifying selection
AsGRAS29	Pepsico2_Contig10379.mrna1	Os10t0551200-01	0.916894	1.75498	0.522453	Purifying selection
AsGRAS29	Pepsico2_Contig10379.mrna1	Os03t0408600-01	0.867204	3.57473	0.242593	Purifying selection
AsGRAS29	Pepsico2_Contig10379.mrna1	Os11t0141550-01	0.796472	2.41723	0.329498	Purifying selection
AsGRAS29	Pepsico2_Contig10379.mrna1	Os07t0586900-01	0.934035	5.34055	0.174895	Purifying selection
AsGRAS29	Pepsico2_Contig10379.mrna1	Os12t0138166-00	0.801458	2.52906	0.316899	Purifying selection
AsGRAS29	Pepsico2_Contig10379.mrna1	Os05t0485400-00	0.734317	4.79552	0.153125	Purifying selection
AsGRAS29	Pepsico2_Contig10379.mrna1	Os12t0138200-00	0.796985	2.62696	0.303387	Purifying selection
AsGRAS29	Pepsico2_Contig10379.mrna1	Os05t0378200-00	0.78522	3.11226	0.252299	Purifying selection
AsGRAS29	Pepsico2_Contig10379.mrna1	Os11t0706200-00	0.823641	4.81935	0.170903	Purifying selection
AsGRAS29	Pepsico2_Contig10379.mrna1	Os03t0707600-01	0.748047	2.63799	0.283567	Purifying selection
AsGRAS29	Pepsico2_Contig10379.mrna1	Os11t0141700-00	0.802787	2.40494	0.333808	Purifying selection
AsGRAS29	Pepsico2_Contig10379.mrna1	Os11t0500050-00	0.842979	2.01811	0.417708	Purifying selection
AsGRAS29	Pepsico2_Contig10379.mrna1	Os04t0580300-01	0.78571	2.51932	0.311873	Purifying selection
AsGRAS29	Pepsico2_Contig10379.mrna1	Os05t0500600-01	0.853436	2.4662	0.346053	Purifying selection
AsGRAS29	Pepsico2_Contig10379.mrna1	Os11t0141500-00	0.753938	2.33214	0.323282	Purifying selection
AsGRAS29	Pepsico2_Contig10379.mrna1	Os07t0583600-01	0.411475	2.79288	0.14733	Purifying selection
AsGRAS29	Pepsico2_Contig10379.mrna1	Os07t0583600-02	0.411475	2.79288	0.14733	Purifying selection
AsGRAS29	Pepsico2_Contig10379.mrna1	Os07t0583600-03	0.259235	2.24447	0.115499	Purifying selection
AsGRAS29	Pepsico2_Contig10379.mrna1	Os03t0263300-01	0.827408	2.446	0.33827	Purifying selection
AsGRAS29	Pepsico2_Contig10379.mrna1	Os04t0432100-00	0.917061	1.87913	0.488025	Purifying selection
AsGRAS29	Pepsico2_Contig10379.mrna1	Os07t0567700-01	0.680333	1.63665	0.415686	Purifying selection
AsGRAS29	Pepsico2_Contig10379.mrna1	Os12t0138100-00	0.759941	2.34804	0.323649	Purifying selection
AsGRAS29	Pepsico2_Contig10379.mrna1	Os01t0842200-01	0.891112	2.92581	0.304569	Purifying selection
AsGRAS29	Pepsico2_Contig10379.mrna1	Os11t0705900-01	0.839971	2.32528	0.361234	Purifying selection
AsGRAS29	Pepsico2_Contig10379.mrna1	Os01t0842200-02	0.891112	2.92581	0.304569	Purifying selection
AsGRAS29	Pepsico2_Contig10379.mrna1	Os07t0545800-01	0.0490427	0.53246	0.0921057	Purifying selection
AsGRAS30	Pepsico1_Contig28179.mrna1	Os06t0211500-00	0.660337	0.74458	0.886858	Purifying selection
AsGRAS30	Pepsico1_Contig28179.mrna1	Os03t0103400-01	0.791154	1.20492	0.656603	Purifying selection
AsGRAS30	Pepsico1_Contig28179.mrna1	Os06t0610350-01	0.771195	0.898191	0.858609	Purifying selection
AsGRAS30	Pepsico1_Contig28179.mrna1	Os01t0948200-00	0.728332	0.768758	0.947413	Purifying selection
AsGRAS30	Pepsico1_Contig28179.mrna1	Os11t0705200-01	0.89552	1.01187	0.885018	Purifying selection
AsGRAS30	Pepsico1_Contig28179.mrna1	Os05t0378500-00	0.841743	1.00754	0.835445	Purifying selection
AsGRAS30	Pepsico1_Contig28179.mrna1	Os01t0646300-01	0.77773	1.13586	0.684703	Purifying selection
AsGRAS30	Pepsico1_Contig28179.mrna1	Os07t0589200-00	0.796511	0.861818	0.924221	Purifying selection
AsGRAS30	Pepsico1_Contig28179.mrna1	Os02t0662700-02	0.839713	2.94075	0.285544	Purifying selection
AsGRAS30	Pepsico1_Contig28179.mrna1	Os06t0127800-01	0.799023	1.02147	0.782227	Purifying selection
AsGRAS30	Pepsico1_Contig28179.mrna1	Os02t0662700-01	0.842427	1.76477	0.477358	Purifying selection
AsGRAS30	Pepsico1_Contig28179.mrna1	Os12t0573200-01	0.903777	1.50276	0.60141	Purifying selection
AsGRAS30	Pepsico1_Contig28179.mrna1	Os12t0162700-00	0.86283	1.80864	0.477059	Purifying selection
AsGRAS30	Pepsico1_Contig28179.mrna1	Os05t0574900-01	0.760545	0.99261	0.766208	Purifying selection
AsGRAS30	Pepsico1_Contig28179.mrna1	Os11t0139600-01	0.901957	1.29042	0.698962	Purifying selection
AsGRAS30	Pepsico1_Contig28179.mrna1	Os10t0551200-01	0.807641	0.973245	0.829843	Purifying selection
AsGRAS30	Pepsico1_Contig28179.mrna1	Os03t0408600-01	0.768589	1.01987	0.753618	Purifying selection
AsGRAS30	Pepsico1_Contig28179.mrna1	Os11t0141550-01	1.18004	3.08962	0.381938	Purifying selection
AsGRAS30	Pepsico1_Contig28179.mrna1	Os11t0124300-01	0.788036	1.33288	0.591226	Purifying selection
AsGRAS30	Pepsico1_Contig28179.mrna1	Os07t0586900-01	0.906188	0.933957	0.970266	Purifying selection
AsGRAS30	Pepsico1_Contig28179.mrna1	Os12t0138166-00	0.84526	2.89474	0.291999	Purifying selection
AsGRAS30	Pepsico1_Contig28179.mrna1	Os02t0663100-01	0.787542	2.13533	0.368815	Purifying selection
AsGRAS30	Pepsico1_Contig28179.mrna1	Os03t0723000-01	0.713258	1.23044	0.579678	Purifying selection
AsGRAS30	Pepsico1_Contig28179.mrna1	Os05t0485400-00	0.779493	0.995824	0.782762	Purifying selection
AsGRAS30	Pepsico1_Contig28179.mrna1	Os12t0138200-00	0.76558	1.06021	0.722105	Purifying selection
AsGRAS30	Pepsico1_Contig28179.mrna1	Os05t0378200-00	0.685557	0.891732	0.768792	Purifying selection
AsGRAS30	Pepsico1_Contig28179.mrna1	Os11t0706200-00	0.946777	1.68773	0.560976	Purifying selection
AsGRAS30	Pepsico1_Contig28179.mrna1	Os03t0707600-01	0.777863	1.04109	0.747161	Purifying selection
AsGRAS30	Pepsico1_Contig28179.mrna1	Os02t0681900-01	0.204227	0.709098	0.28801	Purifying selection
AsGRAS30	Pepsico1_Contig28179.mrna1	Os11t0141700-00	0.7628	1.0421	0.731986	Purifying selection
AsGRAS30	Pepsico1_Contig28179.mrna1	Os03t0723000-02	0.713258	1.23044	0.579678	Purifying selection
AsGRAS30	Pepsico1_Contig28179.mrna1	Os11t0500050-00	0.687999	1.22352	0.562313	Purifying selection
AsGRAS30	Pepsico1_Contig28179.mrna1	Os03t0433200-01	0.786966	0.957461	0.821929	Purifying selection
AsGRAS30	Pepsico1_Contig28179.mrna1	Os10t0369600-01	0.868214	2.2179	0.391458	Purifying selection
AsGRAS30	Pepsico1_Contig28179.mrna1	Os04t0580300-01	0.140061	0.57337	0.244277	Purifying selection
AsGRAS30	Pepsico1_Contig28179.mrna1	Os04t0555000-01	0.815453	1.71742	0.474813	Purifying selection
AsGRAS30	Pepsico1_Contig28179.mrna1	Os05t0500600-01	0.834982	0.865136	0.965146	Purifying selection
AsGRAS30	Pepsico1_Contig28179.mrna1	Os11t0141500-00	0.775687	0.954805	0.812403	Purifying selection
AsGRAS30	Pepsico1_Contig28179.mrna1	Os07t0583600-01	0.802684	1.6321	0.491811	Purifying selection
AsGRAS30	Pepsico1_Contig28179.mrna1	Os12t0122000-01	0.789897	1.12898	0.699654	Purifying selection
AsGRAS30	Pepsico1_Contig28179.mrna1	Os07t0583600-02	0.802684	1.6321	0.491811	Purifying selection
AsGRAS30	Pepsico1_Contig28179.mrna1	Os07t0583600-03	0.65401	1.33938	0.488292	Purifying selection
AsGRAS30	Pepsico1_Contig28179.mrna1	Os03t0263300-01	0.813241	0.998885	0.814149	Purifying selection
AsGRAS30	Pepsico1_Contig28179.mrna1	Os06t0105350-01	0.900209	1.0048	0.89591	Purifying selection
AsGRAS30	Pepsico1_Contig28179.mrna1	Os04t0432100-00	0.906716	1.07524	0.843266	Purifying selection
AsGRAS30	Pepsico1_Contig28179.mrna1	Os07t0567700-01	0.659576	1.16531	0.566009	Purifying selection
AsGRAS30	Pepsico1_Contig28179.mrna1	Os07t0567700-02	0.837229	1.02962	0.813142	Purifying selection
AsGRAS30	Pepsico1_Contig28179.mrna1	Os12t0138100-00	0.780103	0.939678	0.830181	Purifying selection
AsGRAS30	Pepsico1_Contig28179.mrna1	Os01t0842200-01	0.972968	3.59541	0.270614	Purifying selection
AsGRAS30	Pepsico1_Contig28179.mrna1	Os07t0567700-03	0.71365	1.15281	0.619051	Purifying selection
AsGRAS30	Pepsico1_Contig28179.mrna1	Os11t0705900-01	0.871575	1.00967	0.863223	Purifying selection
AsGRAS30	Pepsico1_Contig28179.mrna1	Os02t0197300-00	0.837278	1.1319	0.739712	Purifying selection
AsGRAS30	Pepsico1_Contig28179.mrna1	Os01t0842200-02	0.972968	3.59541	0.270614	Purifying selection
AsGRAS30	Pepsico1_Contig28179.mrna1	Os07t0545800-01	0.864327	3.99142	0.216546	Purifying selection

## Sheet: As.Zm
Table S5 One-to-one orthologous relationships between the GRAS gene members in Avena Sativa and Zea mays
AsGRAS Gene Name	AsGRAS Gene ID	ZmGRAS Gene ID	Ka	Ks	Ka/Ks	Selection Pressure
AsGRAS01	Pepsico1_Contig29889.mrna1	Zm00001eb399000_T001	0.10892	0.342599	0.317921	Purifying selection
AsGRAS01	Pepsico1_Contig29889.mrna1	Zm00001eb268460_T001	0.187353	0.52113	0.359512	Purifying selection
AsGRAS01	Pepsico1_Contig29889.mrna1	Zm00001eb301410_T001	0.203743	0.752165	0.270875	Purifying selection
AsGRAS01	Pepsico1_Contig29889.mrna1	Zm00001eb164500_T001	0.852254	1.11303	0.765703	Purifying selection
AsGRAS01	Pepsico1_Contig29889.mrna1	Zm00001eb164480_T001	0.910963	0.982605	0.92709	Purifying selection
AsGRAS01	Pepsico1_Contig29889.mrna1	Zm00001eb164480_T002	0.910963	0.982605	0.92709	Purifying selection
AsGRAS01	Pepsico1_Contig29889.mrna1	Zm00001eb011560_T001	0.867713	0.873628	0.993229	Purifying selection
AsGRAS01	Pepsico1_Contig29889.mrna1	Zm00001eb202270_T001	0.798459	2.27496	0.350978	Purifying selection
AsGRAS01	Pepsico1_Contig29889.mrna1	Zm00001eb055700_T001	0.76437	1.37237	0.55697	Purifying selection
AsGRAS01	Pepsico1_Contig29889.mrna1	Zm00001eb325750_T001	0.89662	0.997286	0.89906	Purifying selection
AsGRAS01	Pepsico1_Contig29889.mrna1	Zm00001eb325750_T003	0.89662	0.997286	0.89906	Purifying selection
AsGRAS01	Pepsico1_Contig29889.mrna1	Zm00001eb049620_T001	0.810483	0.864305	0.937728	Purifying selection
AsGRAS01	Pepsico1_Contig29889.mrna1	Zm00001eb325750_T002	0.89662	0.997286	0.89906	Purifying selection
AsGRAS01	Pepsico1_Contig29889.mrna1	Zm00001eb215870_T001	0.734963	1.19479	0.615142	Purifying selection
AsGRAS01	Pepsico1_Contig29889.mrna1	Zm00001eb196430_T001	0.835441	0.831376	1.00489	Purifying selection
AsGRAS01	Pepsico1_Contig29889.mrna1	Zm00001eb133730_T001	0.879359	1.01307	0.868011	Purifying selection
AsGRAS01	Pepsico1_Contig29889.mrna1	Zm00001eb019640_T001	0.896782	0.874521	1.02546	Purifying selection
AsGRAS01	Pepsico1_Contig29889.mrna1	Zm00001eb158520_T001	0.744967	0.896208	0.831243	Purifying selection
AsGRAS01	Pepsico1_Contig29889.mrna1	Zm00001eb266920_T001	1.10335	2.70909	0.407276	Purifying selection
AsGRAS01	Pepsico1_Contig29889.mrna1	Zm00001eb195650_T001	0.775896	0.975203	0.795625	Purifying selection
AsGRAS01	Pepsico1_Contig29889.mrna1	Zm00001eb136350_T001	0.90077	1.06414	0.846474	Purifying selection
AsGRAS01	Pepsico1_Contig29889.mrna1	Zm00001eb136150_T001	0.83269	0.963074	0.864617	Purifying selection
AsGRAS01	Pepsico1_Contig29889.mrna1	Zm00001eb165340_T001	0.971487	1.95815	0.496126	Purifying selection
AsGRAS01	Pepsico1_Contig29889.mrna1	Zm00001eb108090_T001	0.847299	0.965905	0.877207	Purifying selection
AsGRAS01	Pepsico1_Contig29889.mrna1	Zm00001eb379340_T001	0.434975	0.820928	0.529858	Purifying selection
AsGRAS01	Pepsico1_Contig29889.mrna1	Zm00001eb165340_T002	0.963552	1.86076	0.517828	Purifying selection
AsGRAS01	Pepsico1_Contig29889.mrna1	Zm00001eb378590_T001	0.808931	0.752463	1.07504	Purifying selection
AsGRAS01	Pepsico1_Contig29889.mrna1	Zm00001eb054480_T001	0.800799	0.831977	0.962525	Purifying selection
AsGRAS01	Pepsico1_Contig29889.mrna1	Zm00001eb378590_T002	0.808931	0.752463	1.07504	Purifying selection
AsGRAS01	Pepsico1_Contig29889.mrna1	Zm00001eb054480_T002	0.771558	0.810317	0.952169	Purifying selection
AsGRAS01	Pepsico1_Contig29889.mrna1	Zm00001eb405080_T001	0.841846	1.00575	0.837034	Purifying selection
AsGRAS01	Pepsico1_Contig29889.mrna1	Zm00001eb285410_T001	0.811405	1.10732	0.732763	Purifying selection
AsGRAS01	Pepsico1_Contig29889.mrna1	Zm00001eb291930_T001	0.926825	0.896706	1.03359	Purifying selection
AsGRAS01	Pepsico1_Contig29889.mrna1	Zm00001eb000470_T001	0.221664	0.661821	0.33493	Purifying selection
AsGRAS01	Pepsico1_Contig29889.mrna1	Zm00001eb108250_T001	0.847052	0.834112	1.01551	Purifying selection
AsGRAS01	Pepsico1_Contig29889.mrna1	Zm00001eb108250_T002	0.847052	0.834112	1.01551	Purifying selection
AsGRAS01	Pepsico1_Contig29889.mrna1	Zm00001eb170110_T001	0.828058	0.876591	0.944634	Purifying selection
AsGRAS01	Pepsico1_Contig29889.mrna1	Zm00001eb164530_T001	0.920218	1.58483	0.580641	Purifying selection
AsGRAS01	Pepsico1_Contig29889.mrna1	Zm00001eb164530_T002	0.911683	2.26861	0.401869	Purifying selection
AsGRAS01	Pepsico1_Contig29889.mrna1	Zm00001eb139470_T001	0.770134	1.12936	0.68192	Purifying selection
AsGRAS01	Pepsico1_Contig29889.mrna1	Zm00001eb392980_T001	0.766485	0.85428	0.897229	Purifying selection
AsGRAS01	Pepsico1_Contig29889.mrna1	Zm00001eb062760_T001	0.997243	2.06079	0.483914	Purifying selection
AsGRAS01	Pepsico1_Contig29889.mrna1	Zm00001eb301400_T001	0.108887	0.357566	0.304522	Purifying selection
AsGRAS01	Pepsico1_Contig29889.mrna1	Zm00001eb148290_T002	0.868712	1.64859	0.526943	Purifying selection
AsGRAS01	Pepsico1_Contig29889.mrna1	Zm00001eb148290_T001	0.868712	1.64859	0.526943	Purifying selection
AsGRAS01	Pepsico1_Contig29889.mrna1	Zm00001eb164350_T001	0.924348	1.1034	0.837725	Purifying selection
AsGRAS01	Pepsico1_Contig29889.mrna1	Zm00001eb236120_T001	0.689292	0.87481	0.787933	Purifying selection
AsGRAS01	Pepsico1_Contig29889.mrna1	Zm00001eb405090_T001	0.896946	1.15252	0.778249	Purifying selection
AsGRAS01	Pepsico1_Contig29889.mrna1	Zm00001eb164470_T001	0.92245	1.44709	0.637451	Purifying selection
AsGRAS01	Pepsico1_Contig29889.mrna1	Zm00001eb187310_T001	0.814676	0.999031	0.815466	Purifying selection
AsGRAS01	Pepsico1_Contig29889.mrna1	Zm00001eb388460_T001	0.82311	0.932126	0.883046	Purifying selection
AsGRAS01	Pepsico1_Contig29889.mrna1	Zm00001eb196420_T001	0.82673	0.753451	1.09726	Purifying selection
AsGRAS01	Pepsico1_Contig29889.mrna1	Zm00001eb136140_T001	0.906631	2.26857	0.399649	Purifying selection
AsGRAS01	Pepsico1_Contig29889.mrna1	Zm00001eb112130_T001	1.01155	1.62279	0.623341	Purifying selection
AsGRAS01	Pepsico1_Contig29889.mrna1	Zm00001eb093670_T002	0.788135	0.810586	0.972302	Purifying selection
AsGRAS01	Pepsico1_Contig29889.mrna1	Zm00001eb093670_T001	0.793534	0.806244	0.984236	Purifying selection
AsGRAS01	Pepsico1_Contig29889.mrna1	Zm00001eb067930_T001	0.348876	0.733509	0.475626	Purifying selection
AsGRAS01	Pepsico1_Contig29889.mrna1	Zm00001eb363140_T001	0.817288	1.03084	0.792835	Purifying selection
AsGRAS01	Pepsico1_Contig29889.mrna1	Zm00001eb266930_T002	0.963597	2.73191	0.352719	Purifying selection
AsGRAS01	Pepsico1_Contig29889.mrna1	Zm00001eb324600_T001	0.710091	0.894395	0.793935	Purifying selection
AsGRAS01	Pepsico1_Contig29889.mrna1	Zm00001eb073130_T001	0.804271	1.01092	0.795582	Purifying selection
AsGRAS01	Pepsico1_Contig29889.mrna1	Zm00001eb115950_T001	0.861142	1.18705	0.725445	Purifying selection
AsGRAS01	Pepsico1_Contig29889.mrna1	Zm00001eb398990_T001	0.19369	0.753908	0.256915	Purifying selection
AsGRAS01	Pepsico1_Contig29889.mrna1	Zm00001eb082700_T001	0.768834	0.855007	0.899214	Purifying selection
AsGRAS01	Pepsico1_Contig29889.mrna1	Zm00001eb107910_T002	0.879424	1.10051	0.799107	Purifying selection
AsGRAS01	Pepsico1_Contig29889.mrna1	Zm00001eb107910_T001	0.879424	1.10051	0.799107	Purifying selection
AsGRAS01	Pepsico1_Contig29889.mrna1	Zm00001eb141310_T001	0.796111	0.941659	0.845435	Purifying selection
AsGRAS01	Pepsico1_Contig29889.mrna1	Zm00001eb326210_T001	0.885917	0.880076	1.00664	Purifying selection
AsGRAS01	Pepsico1_Contig29889.mrna1	Zm00001eb216610_T001	0.760199	0.878668	0.865172	Purifying selection
AsGRAS01	Pepsico1_Contig29889.mrna1	Zm00001eb249840_T001	0.473149	1.5525	0.304766	Purifying selection
AsGRAS01	Pepsico1_Contig29889.mrna1	Zm00001eb428430_T001	0.82688	1.03947	0.795483	Purifying selection
AsGRAS01	Pepsico1_Contig29889.mrna1	Zm00001eb249840_T002	0.442707	1.70204	0.260104	Purifying selection
AsGRAS01	Pepsico1_Contig29889.mrna1	Zm00001eb106490_T001	0.90844	2.07944	0.436868	Purifying selection
AsGRAS01	Pepsico1_Contig29889.mrna1	Zm00001eb081760_T001	0.985552	0.959626	1.02702	Purifying selection
AsGRAS01	Pepsico1_Contig29889.mrna1	Zm00001eb405110_T001	0.803048	0.800168	1.0036	Purifying selection
AsGRAS01	Pepsico1_Contig29889.mrna1	Zm00001eb164490_T001	0.933226	1.06038	0.880084	Purifying selection
AsGRAS01	Pepsico1_Contig29889.mrna1	Zm00001eb074460_T001	0.408347	1.47384	0.277064	Purifying selection
AsGRAS01	Pepsico1_Contig29889.mrna1	Zm00001eb186770_T002	0.424429	1.28055	0.331443	Purifying selection
AsGRAS01	Pepsico1_Contig29889.mrna1	Zm00001eb327300_T001	0.938601	1.50568	0.623376	Purifying selection
AsGRAS01	Pepsico1_Contig29889.mrna1	Zm00001eb326020_T001	0.88271	0.879813	1.00329	Purifying selection
AsGRAS01	Pepsico1_Contig29889.mrna1	Zm00001eb186770_T001	0.407886	1.3506	0.302003	Purifying selection
AsGRAS01	Pepsico1_Contig29889.mrna1	Zm00001eb020850_T001	0.885897	0.945839	0.936625	Purifying selection
AsGRAS01	Pepsico1_Contig29889.mrna1	Zm00001eb186770_T003	0.397326	1.47959	0.268538	Purifying selection
AsGRAS01	Pepsico1_Contig29889.mrna1	Zm00001eb429450_T001	0.396141	1.70585	0.232225	Purifying selection
AsGRAS01	Pepsico1_Contig29889.mrna1	Zm00001eb326550_T001	0.320799	1.35029	0.237578	Purifying selection
AsGRAS01	Pepsico1_Contig29889.mrna1	Zm00001eb029390_T001	0.93045	0.971719	0.95753	Purifying selection
AsGRAS01	Pepsico1_Contig29889.mrna1	Zm00001eb344400_T001	0.865991	2.07842	0.416658	Purifying selection
AsGRAS01	Pepsico1_Contig29889.mrna1	Zm00001eb002990_T001	0.207513	0.603535	0.343829	Purifying selection
AsGRAS01	Pepsico1_Contig29889.mrna1	Zm00001eb291030_T001	0.789511	1.15798	0.681798	Purifying selection
AsGRAS01	Pepsico1_Contig29889.mrna1	Zm00001eb067940_T001	0.116622	0.495685	0.235275	Purifying selection
AsGRAS01	Pepsico1_Contig29889.mrna1	Zm00001eb023010_T001	0.141695	0.442734	0.320045	Purifying selection
AsGRAS01	Pepsico1_Contig29889.mrna1	Zm00001eb422620_T001	0.703197	0.930915	0.755382	Purifying selection
AsGRAS02	Pepsico2_Contig16967.mrna1	Zm00001eb399000_T001	0.798095	0.767329	1.04009	Purifying selection
AsGRAS02	Pepsico2_Contig16967.mrna1	Zm00001eb268460_T001	0.791057	0.798761	0.990355	Purifying selection
AsGRAS02	Pepsico2_Contig16967.mrna1	Zm00001eb301410_T001	0.864625	1.19788	0.721799	Purifying selection
AsGRAS02	Pepsico2_Contig16967.mrna1	Zm00001eb164500_T001	0.868916	0.805525	1.0787	Purifying selection
AsGRAS02	Pepsico2_Contig16967.mrna1	Zm00001eb164480_T001	0.808352	0.826425	0.97813	Purifying selection
AsGRAS02	Pepsico2_Contig16967.mrna1	Zm00001eb164480_T002	0.808352	0.826425	0.97813	Purifying selection
AsGRAS02	Pepsico2_Contig16967.mrna1	Zm00001eb011560_T001	0.703665	0.686631	1.02481	Purifying selection
AsGRAS02	Pepsico2_Contig16967.mrna1	Zm00001eb202270_T001	0.748339	1.68084	0.445216	Purifying selection
AsGRAS02	Pepsico2_Contig16967.mrna1	Zm00001eb055700_T001	0.689664	1.41624	0.486967	Purifying selection
AsGRAS02	Pepsico2_Contig16967.mrna1	Zm00001eb325750_T001	0.690244	0.904728	0.76293	Purifying selection
AsGRAS02	Pepsico2_Contig16967.mrna1	Zm00001eb325750_T003	0.690244	0.904728	0.76293	Purifying selection
AsGRAS02	Pepsico2_Contig16967.mrna1	Zm00001eb049620_T001	0.825347	1.09065	0.756748	Purifying selection
AsGRAS02	Pepsico2_Contig16967.mrna1	Zm00001eb325750_T002	0.690244	0.904728	0.76293	Purifying selection
AsGRAS02	Pepsico2_Contig16967.mrna1	Zm00001eb215870_T001	0.660643	1.2877	0.513041	Purifying selection
AsGRAS02	Pepsico2_Contig16967.mrna1	Zm00001eb196430_T001	0.637129	0.760664	0.837597	Purifying selection
AsGRAS02	Pepsico2_Contig16967.mrna1	Zm00001eb133730_T001	0.901322	1.96877	0.457809	Purifying selection
AsGRAS02	Pepsico2_Contig16967.mrna1	Zm00001eb019640_T001	0.830783	0.801276	1.03682	Purifying selection
AsGRAS02	Pepsico2_Contig16967.mrna1	Zm00001eb158520_T001	0.319702	0.6476	0.493672	Purifying selection
AsGRAS02	Pepsico2_Contig16967.mrna1	Zm00001eb266920_T001	1.1787	1.61699	0.728949	Purifying selection
AsGRAS02	Pepsico2_Contig16967.mrna1	Zm00001eb195650_T001	0.641679	0.692628	0.926441	Purifying selection
AsGRAS02	Pepsico2_Contig16967.mrna1	Zm00001eb136350_T001	0.943567	1.26973	0.743126	Purifying selection
AsGRAS02	Pepsico2_Contig16967.mrna1	Zm00001eb136150_T001	0.817056	0.927152	0.881253	Purifying selection
AsGRAS02	Pepsico2_Contig16967.mrna1	Zm00001eb165340_T001	0.962908	2.21499	0.434724	Purifying selection
AsGRAS02	Pepsico2_Contig16967.mrna1	Zm00001eb108090_T001	0.786367	0.993541	0.791479	Purifying selection
AsGRAS02	Pepsico2_Contig16967.mrna1	Zm00001eb379340_T001	0.789637	0.85297	0.925749	Purifying selection
AsGRAS02	Pepsico2_Contig16967.mrna1	Zm00001eb165340_T002	0.962908	2.21499	0.434724	Purifying selection
AsGRAS02	Pepsico2_Contig16967.mrna1	Zm00001eb378590_T001	0.668945	0.663348	1.00844	Purifying selection
AsGRAS02	Pepsico2_Contig16967.mrna1	Zm00001eb054480_T001	0.440132	0.737584	0.596722	Purifying selection
AsGRAS02	Pepsico2_Contig16967.mrna1	Zm00001eb378590_T002	0.668945	0.663348	1.00844	Purifying selection
AsGRAS02	Pepsico2_Contig16967.mrna1	Zm00001eb054480_T002	0.440132	0.737584	0.596722	Purifying selection
AsGRAS02	Pepsico2_Contig16967.mrna1	Zm00001eb405080_T001	0.728754	0.909034	0.80168	Purifying selection
AsGRAS02	Pepsico2_Contig16967.mrna1	Zm00001eb285410_T001	0.727846	0.838231	0.868312	Purifying selection
AsGRAS02	Pepsico2_Contig16967.mrna1	Zm00001eb291930_T001	0.785793	0.67838	1.15834	Purifying selection
AsGRAS02	Pepsico2_Contig16967.mrna1	Zm00001eb000470_T001	0.865598	0.703231	1.23089	Purifying selection
AsGRAS02	Pepsico2_Contig16967.mrna1	Zm00001eb108250_T001	0.726565	0.728695	0.997076	Purifying selection
AsGRAS02	Pepsico2_Contig16967.mrna1	Zm00001eb108250_T002	0.726565	0.728695	0.997076	Purifying selection
AsGRAS02	Pepsico2_Contig16967.mrna1	Zm00001eb170110_T001	0.57639	0.732826	0.78653	Purifying selection
AsGRAS02	Pepsico2_Contig16967.mrna1	Zm00001eb164530_T001	0.921947	1.59879	0.576653	Purifying selection
AsGRAS02	Pepsico2_Contig16967.mrna1	Zm00001eb164530_T002	0.914062	2.15885	0.423402	Purifying selection
AsGRAS02	Pepsico2_Contig16967.mrna1	Zm00001eb139470_T001	0.784797	0.972639	0.806873	Purifying selection
AsGRAS02	Pepsico2_Contig16967.mrna1	Zm00001eb392980_T001	0.873798	0.818125	1.06805	Purifying selection
AsGRAS02	Pepsico2_Contig16967.mrna1	Zm00001eb062760_T001	0.868024	2.78738	0.311412	Purifying selection
AsGRAS02	Pepsico2_Contig16967.mrna1	Zm00001eb301400_T001	0.736208	0.723505	1.01756	Purifying selection
AsGRAS02	Pepsico2_Contig16967.mrna1	Zm00001eb148290_T002	0.863136	1.20524	0.716151	Purifying selection
AsGRAS02	Pepsico2_Contig16967.mrna1	Zm00001eb148290_T001	0.863136	1.20524	0.716151	Purifying selection
AsGRAS02	Pepsico2_Contig16967.mrna1	Zm00001eb164350_T001	0.879384	0.955814	0.920037	Purifying selection
AsGRAS02	Pepsico2_Contig16967.mrna1	Zm00001eb236120_T001	0.647933	0.7243	0.894565	Purifying selection
AsGRAS02	Pepsico2_Contig16967.mrna1	Zm00001eb405090_T001	0.786902	0.849332	0.926495	Purifying selection
AsGRAS02	Pepsico2_Contig16967.mrna1	Zm00001eb164470_T001	0.914517	1.51916	0.601989	Purifying selection
AsGRAS02	Pepsico2_Contig16967.mrna1	Zm00001eb187310_T001	0.804624	0.882778	0.911468	Purifying selection
AsGRAS02	Pepsico2_Contig16967.mrna1	Zm00001eb388460_T001	0.61205	0.736017	0.831571	Purifying selection
AsGRAS02	Pepsico2_Contig16967.mrna1	Zm00001eb196420_T001	0.708801	0.822784	0.861468	Purifying selection
AsGRAS02	Pepsico2_Contig16967.mrna1	Zm00001eb136140_T001	0.814054	1.45224	0.56055	Purifying selection
AsGRAS02	Pepsico2_Contig16967.mrna1	Zm00001eb112130_T001	0.986246	1.44335	0.683302	Purifying selection
AsGRAS02	Pepsico2_Contig16967.mrna1	Zm00001eb093670_T002	0.63539	0.595265	1.06741	Purifying selection
AsGRAS02	Pepsico2_Contig16967.mrna1	Zm00001eb093670_T001	0.643747	0.57602	1.11758	Purifying selection
AsGRAS02	Pepsico2_Contig16967.mrna1	Zm00001eb067930_T001	0.96933	1.04628	0.926457	Purifying selection
AsGRAS02	Pepsico2_Contig16967.mrna1	Zm00001eb363140_T001	0.663038	0.63921	1.03728	Purifying selection
AsGRAS02	Pepsico2_Contig16967.mrna1	Zm00001eb324600_T001	0.621838	0.652447	0.953086	Purifying selection
AsGRAS02	Pepsico2_Contig16967.mrna1	Zm00001eb073130_T001	0.827801	0.885643	0.93469	Purifying selection
AsGRAS02	Pepsico2_Contig16967.mrna1	Zm00001eb115950_T001	0.921539	0.905062	1.01821	Purifying selection
AsGRAS02	Pepsico2_Contig16967.mrna1	Zm00001eb398990_T001	0.926795	1.30965	0.707667	Purifying selection
AsGRAS02	Pepsico2_Contig16967.mrna1	Zm00001eb082700_T001	0.645814	0.856844	0.753713	Purifying selection
AsGRAS02	Pepsico2_Contig16967.mrna1	Zm00001eb107910_T002	0.736079	1.05684	0.696492	Purifying selection
AsGRAS02	Pepsico2_Contig16967.mrna1	Zm00001eb107910_T001	0.736079	1.05684	0.696492	Purifying selection
AsGRAS02	Pepsico2_Contig16967.mrna1	Zm00001eb141310_T001	0.658993	0.618851	1.06486	Purifying selection
AsGRAS02	Pepsico2_Contig16967.mrna1	Zm00001eb326210_T001	0.728613	0.676995	1.07625	Purifying selection
AsGRAS02	Pepsico2_Contig16967.mrna1	Zm00001eb216610_T001	0.462788	0.656237	0.705214	Purifying selection
AsGRAS02	Pepsico2_Contig16967.mrna1	Zm00001eb249840_T001	0.805901	1.96788	0.409528	Purifying selection
AsGRAS02	Pepsico2_Contig16967.mrna1	Zm00001eb428430_T001	0.792623	0.806075	0.983311	Purifying selection
AsGRAS02	Pepsico2_Contig16967.mrna1	Zm00001eb249840_T002	0.830877	1.99677	0.41611	Purifying selection
AsGRAS02	Pepsico2_Contig16967.mrna1	Zm00001eb106490_T001	0.809165	2.51454	0.321794	Purifying selection
AsGRAS02	Pepsico2_Contig16967.mrna1	Zm00001eb081760_T001	0.898808	0.870802	1.03216	Purifying selection
AsGRAS02	Pepsico2_Contig16967.mrna1	Zm00001eb405110_T001	0.637008	0.61388	1.03768	Purifying selection
AsGRAS02	Pepsico2_Contig16967.mrna1	Zm00001eb164490_T001	0.787945	0.892375	0.882976	Purifying selection
AsGRAS02	Pepsico2_Contig16967.mrna1	Zm00001eb074460_T001	0.831176	1.72271	0.482481	Purifying selection
AsGRAS02	Pepsico2_Contig16967.mrna1	Zm00001eb186770_T002	0.784177	1.47015	0.5334	Purifying selection
AsGRAS02	Pepsico2_Contig16967.mrna1	Zm00001eb327300_T001	0.689463	1.25973	0.547309	Purifying selection
AsGRAS02	Pepsico2_Contig16967.mrna1	Zm00001eb326020_T001	0.772632	0.915398	0.84404	Purifying selection
AsGRAS02	Pepsico2_Contig16967.mrna1	Zm00001eb186770_T001	0.821213	1.5073	0.544824	Purifying selection
AsGRAS02	Pepsico2_Contig16967.mrna1	Zm00001eb020850_T001	0.782851	0.684012	1.1445	Purifying selection
AsGRAS02	Pepsico2_Contig16967.mrna1	Zm00001eb186770_T003	0.817513	1.59916	0.511213	Purifying selection
AsGRAS02	Pepsico2_Contig16967.mrna1	Zm00001eb429450_T001	0.798282	1.58855	0.502523	Purifying selection
AsGRAS02	Pepsico2_Contig16967.mrna1	Zm00001eb326550_T001	0.799641	1.38235	0.578465	Purifying selection
AsGRAS02	Pepsico2_Contig16967.mrna1	Zm00001eb029390_T001	0.922253	1.24582	0.740279	Purifying selection
AsGRAS02	Pepsico2_Contig16967.mrna1	Zm00001eb344400_T001	0.433221	2.11499	0.204833	Purifying selection
AsGRAS02	Pepsico2_Contig16967.mrna1	Zm00001eb002990_T001	0.808672	0.725317	1.11492	Purifying selection
AsGRAS02	Pepsico2_Contig16967.mrna1	Zm00001eb291030_T001	0.593339	0.78156	0.759173	Purifying selection
AsGRAS02	Pepsico2_Contig16967.mrna1	Zm00001eb067940_T001	0.948028	0.96251	0.984954	Purifying selection
AsGRAS02	Pepsico2_Contig16967.mrna1	Zm00001eb023010_T001	0.770047	0.777746	0.9901	Purifying selection
AsGRAS02	Pepsico2_Contig16967.mrna1	Zm00001eb422620_T001	0.634633	0.784418	0.809049	Purifying selection
AsGRAS03	Pepsico2_Contig1709.mrna2	Zm00001eb202270_T001	0.875011	3.0184	0.289893	Purifying selection
AsGRAS03	Pepsico2_Contig1709.mrna2	Zm00001eb133730_T001	0.923783	3.40587	0.271232	Purifying selection
AsGRAS03	Pepsico2_Contig1709.mrna2	Zm00001eb308090_T001	0.829454	0.998658	0.830568	Purifying selection
AsGRAS03	Pepsico2_Contig1709.mrna2	Zm00001eb401210_T001	0.178447	0.829293	0.215179	Purifying selection
AsGRAS03	Pepsico2_Contig1709.mrna2	Zm00001eb165340_T002	0.837837	3.45161	0.242738	Purifying selection
AsGRAS03	Pepsico2_Contig1709.mrna2	Zm00001eb355870_T001	0.800686	1.43124	0.559433	Purifying selection
AsGRAS03	Pepsico2_Contig1709.mrna2	Zm00001eb062760_T001	0.769512	2.61671	0.294076	Purifying selection
AsGRAS03	Pepsico2_Contig1709.mrna2	Zm00001eb027720_T001	0.105904	0.625681	0.169263	Purifying selection
AsGRAS03	Pepsico2_Contig1709.mrna2	Zm00001eb027720_T002	0.105904	0.625681	0.169263	Purifying selection
AsGRAS03	Pepsico2_Contig1709.mrna2	Zm00001eb136140_T001	0.813425	2.48564	0.32725	Purifying selection
AsGRAS03	Pepsico2_Contig1709.mrna2	Zm00001eb012280_T001	0.814208	4.21269	0.193275	Purifying selection
AsGRAS03	Pepsico2_Contig1709.mrna2	Zm00001eb249840_T002	0.869624	2.54021	0.342343	Purifying selection
AsGRAS03	Pepsico2_Contig1709.mrna2	Zm00001eb186770_T001	0.845606	2.88722	0.292879	Purifying selection
AsGRAS03	Pepsico2_Contig1709.mrna2	Zm00001eb186770_T003	0.840684	2.99431	0.28076	Purifying selection
AsGRAS04	Pepsico1_Contig26725.mrna2	Zm00001eb399000_T001	0.10892	0.342599	0.317921	Purifying selection
AsGRAS04	Pepsico1_Contig26725.mrna2	Zm00001eb268460_T001	0.187353	0.52113	0.359512	Purifying selection
AsGRAS04	Pepsico1_Contig26725.mrna2	Zm00001eb301410_T001	0.203743	0.752165	0.270875	Purifying selection
AsGRAS04	Pepsico1_Contig26725.mrna2	Zm00001eb164500_T001	0.852254	1.11303	0.765703	Purifying selection
AsGRAS04	Pepsico1_Contig26725.mrna2	Zm00001eb164480_T001	0.910972	0.993926	0.916539	Purifying selection
AsGRAS04	Pepsico1_Contig26725.mrna2	Zm00001eb164480_T002	0.910972	0.993926	0.916539	Purifying selection
AsGRAS04	Pepsico1_Contig26725.mrna2	Zm00001eb011560_T001	0.867713	0.873628	0.993229	Purifying selection
AsGRAS04	Pepsico1_Contig26725.mrna2	Zm00001eb202270_T001	0.798459	2.27496	0.350978	Purifying selection
AsGRAS04	Pepsico1_Contig26725.mrna2	Zm00001eb055700_T001	0.769036	1.33477	0.576158	Purifying selection
AsGRAS04	Pepsico1_Contig26725.mrna2	Zm00001eb325750_T001	0.883906	0.976038	0.905605	Purifying selection
AsGRAS04	Pepsico1_Contig26725.mrna2	Zm00001eb325750_T003	0.883906	0.976038	0.905605	Purifying selection
AsGRAS04	Pepsico1_Contig26725.mrna2	Zm00001eb049620_T001	0.810483	0.864305	0.937728	Purifying selection
AsGRAS04	Pepsico1_Contig26725.mrna2	Zm00001eb325750_T002	0.883906	0.976038	0.905605	Purifying selection
AsGRAS04	Pepsico1_Contig26725.mrna2	Zm00001eb215870_T001	0.741941	1.20079	0.617875	Purifying selection
AsGRAS04	Pepsico1_Contig26725.mrna2	Zm00001eb196430_T001	0.835441	0.831376	1.00489	Purifying selection
AsGRAS04	Pepsico1_Contig26725.mrna2	Zm00001eb133730_T001	0.879359	1.01307	0.868011	Purifying selection
AsGRAS04	Pepsico1_Contig26725.mrna2	Zm00001eb019640_T001	0.896782	0.874521	1.02546	Purifying selection
AsGRAS04	Pepsico1_Contig26725.mrna2	Zm00001eb158520_T001	0.744967	0.896208	0.831243	Purifying selection
AsGRAS04	Pepsico1_Contig26725.mrna2	Zm00001eb266920_T001	1.08224	2.86244	0.378084	Purifying selection
AsGRAS04	Pepsico1_Contig26725.mrna2	Zm00001eb195650_T001	0.775896	0.975203	0.795625	Purifying selection
AsGRAS04	Pepsico1_Contig26725.mrna2	Zm00001eb136350_T001	0.90077	1.06414	0.846474	Purifying selection
AsGRAS04	Pepsico1_Contig26725.mrna2	Zm00001eb136150_T001	0.83269	0.963074	0.864617	Purifying selection
AsGRAS04	Pepsico1_Contig26725.mrna2	Zm00001eb165340_T001	0.948824	1.83153	0.518049	Purifying selection
AsGRAS04	Pepsico1_Contig26725.mrna2	Zm00001eb108090_T001	0.847299	0.965905	0.877207	Purifying selection
AsGRAS04	Pepsico1_Contig26725.mrna2	Zm00001eb379340_T001	0.436715	0.820928	0.531978	Purifying selection
AsGRAS04	Pepsico1_Contig26725.mrna2	Zm00001eb165340_T002	0.963552	1.86076	0.517828	Purifying selection
AsGRAS04	Pepsico1_Contig26725.mrna2	Zm00001eb378590_T001	0.820285	0.779988	1.05166	Purifying selection
AsGRAS04	Pepsico1_Contig26725.mrna2	Zm00001eb054480_T001	0.800799	0.831977	0.962525	Purifying selection
AsGRAS04	Pepsico1_Contig26725.mrna2	Zm00001eb378590_T002	0.820285	0.779988	1.05166	Purifying selection
AsGRAS04	Pepsico1_Contig26725.mrna2	Zm00001eb054480_T002	0.771558	0.810317	0.952169	Purifying selection
AsGRAS04	Pepsico1_Contig26725.mrna2	Zm00001eb405080_T001	0.841846	1.00575	0.837034	Purifying selection
AsGRAS04	Pepsico1_Contig26725.mrna2	Zm00001eb285410_T001	0.811405	1.10732	0.732763	Purifying selection
AsGRAS04	Pepsico1_Contig26725.mrna2	Zm00001eb291930_T001	0.926825	0.896706	1.03359	Purifying selection
AsGRAS04	Pepsico1_Contig26725.mrna2	Zm00001eb000470_T001	0.221664	0.661821	0.33493	Purifying selection
AsGRAS04	Pepsico1_Contig26725.mrna2	Zm00001eb108250_T001	0.847052	0.834112	1.01551	Purifying selection
AsGRAS04	Pepsico1_Contig26725.mrna2	Zm00001eb108250_T002	0.847052	0.834112	1.01551	Purifying selection
AsGRAS04	Pepsico1_Contig26725.mrna2	Zm00001eb170110_T001	0.800046	0.859584	0.930737	Purifying selection
AsGRAS04	Pepsico1_Contig26725.mrna2	Zm00001eb164530_T001	0.905889	1.581	0.572984	Purifying selection
AsGRAS04	Pepsico1_Contig26725.mrna2	Zm00001eb164530_T002	0.911683	2.26861	0.401869	Purifying selection
AsGRAS04	Pepsico1_Contig26725.mrna2	Zm00001eb139470_T001	0.770134	1.12936	0.68192	Purifying selection
AsGRAS04	Pepsico1_Contig26725.mrna2	Zm00001eb392980_T001	0.730322	0.85993	0.849281	Purifying selection
AsGRAS04	Pepsico1_Contig26725.mrna2	Zm00001eb062760_T001	0.997243	2.06079	0.483914	Purifying selection
AsGRAS04	Pepsico1_Contig26725.mrna2	Zm00001eb301400_T001	0.108887	0.357566	0.304522	Purifying selection
AsGRAS04	Pepsico1_Contig26725.mrna2	Zm00001eb148290_T002	0.88578	1.5476	0.572356	Purifying selection
AsGRAS04	Pepsico1_Contig26725.mrna2	Zm00001eb148290_T001	0.88578	1.5476	0.572356	Purifying selection
AsGRAS04	Pepsico1_Contig26725.mrna2	Zm00001eb164350_T001	0.924348	1.1034	0.837725	Purifying selection
AsGRAS04	Pepsico1_Contig26725.mrna2	Zm00001eb236120_T001	0.689292	0.87481	0.787933	Purifying selection
AsGRAS04	Pepsico1_Contig26725.mrna2	Zm00001eb405090_T001	0.896946	1.15252	0.778249	Purifying selection
AsGRAS04	Pepsico1_Contig26725.mrna2	Zm00001eb164470_T001	0.92245	1.44709	0.637451	Purifying selection
AsGRAS04	Pepsico1_Contig26725.mrna2	Zm00001eb187310_T001	0.829751	0.917013	0.904841	Purifying selection
AsGRAS04	Pepsico1_Contig26725.mrna2	Zm00001eb388460_T001	0.82311	0.932126	0.883046	Purifying selection
AsGRAS04	Pepsico1_Contig26725.mrna2	Zm00001eb196420_T001	0.82673	0.753451	1.09726	Purifying selection
AsGRAS04	Pepsico1_Contig26725.mrna2	Zm00001eb136140_T001	0.906631	2.26857	0.399649	Purifying selection
AsGRAS04	Pepsico1_Contig26725.mrna2	Zm00001eb112130_T001	1.01155	1.62279	0.623341	Purifying selection
AsGRAS04	Pepsico1_Contig26725.mrna2	Zm00001eb093670_T002	0.788135	0.810586	0.972302	Purifying selection
AsGRAS04	Pepsico1_Contig26725.mrna2	Zm00001eb093670_T001	0.793534	0.806244	0.984236	Purifying selection
AsGRAS04	Pepsico1_Contig26725.mrna2	Zm00001eb067930_T001	0.348876	0.733509	0.475626	Purifying selection
AsGRAS04	Pepsico1_Contig26725.mrna2	Zm00001eb363140_T001	0.817288	1.03084	0.792835	Purifying selection
AsGRAS04	Pepsico1_Contig26725.mrna2	Zm00001eb266930_T002	1.08606	3.96847	0.273673	Purifying selection
AsGRAS04	Pepsico1_Contig26725.mrna2	Zm00001eb324600_T001	0.710091	0.894395	0.793935	Purifying selection
AsGRAS04	Pepsico1_Contig26725.mrna2	Zm00001eb073130_T001	0.801339	0.994061	0.806127	Purifying selection
AsGRAS04	Pepsico1_Contig26725.mrna2	Zm00001eb115950_T001	0.847463	1.21123	0.69967	Purifying selection
AsGRAS04	Pepsico1_Contig26725.mrna2	Zm00001eb398990_T001	0.19369	0.753908	0.256915	Purifying selection
AsGRAS04	Pepsico1_Contig26725.mrna2	Zm00001eb082700_T001	0.768834	0.855007	0.899214	Purifying selection
AsGRAS04	Pepsico1_Contig26725.mrna2	Zm00001eb107910_T002	0.892598	1.07293	0.831929	Purifying selection
AsGRAS04	Pepsico1_Contig26725.mrna2	Zm00001eb107910_T001	0.892598	1.07293	0.831929	Purifying selection
AsGRAS04	Pepsico1_Contig26725.mrna2	Zm00001eb141310_T001	0.796111	0.941659	0.845435	Purifying selection
AsGRAS04	Pepsico1_Contig26725.mrna2	Zm00001eb326210_T001	0.885917	0.880076	1.00664	Purifying selection
AsGRAS04	Pepsico1_Contig26725.mrna2	Zm00001eb216610_T001	0.768347	0.868664	0.884516	Purifying selection
AsGRAS04	Pepsico1_Contig26725.mrna2	Zm00001eb249840_T001	0.473149	1.5525	0.304766	Purifying selection
AsGRAS04	Pepsico1_Contig26725.mrna2	Zm00001eb428430_T001	0.823407	1.06846	0.770645	Purifying selection
AsGRAS04	Pepsico1_Contig26725.mrna2	Zm00001eb249840_T002	0.442707	1.70204	0.260104	Purifying selection
AsGRAS04	Pepsico1_Contig26725.mrna2	Zm00001eb106490_T001	0.903863	2.1071	0.428962	Purifying selection
AsGRAS04	Pepsico1_Contig26725.mrna2	Zm00001eb081760_T001	0.985552	0.959626	1.02702	Purifying selection
AsGRAS04	Pepsico1_Contig26725.mrna2	Zm00001eb405110_T001	0.803048	0.800168	1.0036	Purifying selection
AsGRAS04	Pepsico1_Contig26725.mrna2	Zm00001eb164490_T001	0.933226	1.06038	0.880084	Purifying selection
AsGRAS04	Pepsico1_Contig26725.mrna2	Zm00001eb074460_T001	0.395199	1.45988	0.270706	Purifying selection
AsGRAS04	Pepsico1_Contig26725.mrna2	Zm00001eb186770_T002	0.424429	1.28055	0.331443	Purifying selection
AsGRAS04	Pepsico1_Contig26725.mrna2	Zm00001eb327300_T001	0.938601	1.50568	0.623376	Purifying selection
AsGRAS04	Pepsico1_Contig26725.mrna2	Zm00001eb326020_T001	0.88271	0.879813	1.00329	Purifying selection
AsGRAS04	Pepsico1_Contig26725.mrna2	Zm00001eb186770_T001	0.407886	1.3506	0.302003	Purifying selection
AsGRAS04	Pepsico1_Contig26725.mrna2	Zm00001eb020850_T001	0.894579	0.959677	0.932167	Purifying selection
AsGRAS04	Pepsico1_Contig26725.mrna2	Zm00001eb186770_T003	0.397326	1.47959	0.268538	Purifying selection
AsGRAS04	Pepsico1_Contig26725.mrna2	Zm00001eb429450_T001	0.396141	1.70585	0.232225	Purifying selection
AsGRAS04	Pepsico1_Contig26725.mrna2	Zm00001eb326550_T001	0.320799	1.35029	0.237578	Purifying selection
AsGRAS04	Pepsico1_Contig26725.mrna2	Zm00001eb029390_T001	0.93045	0.971719	0.95753	Purifying selection
AsGRAS04	Pepsico1_Contig26725.mrna2	Zm00001eb344400_T001	0.865991	2.07842	0.416658	Purifying selection
AsGRAS04	Pepsico1_Contig26725.mrna2	Zm00001eb002990_T001	0.207513	0.603535	0.343829	Purifying selection
AsGRAS04	Pepsico1_Contig26725.mrna2	Zm00001eb291030_T001	0.789511	1.15798	0.681798	Purifying selection
AsGRAS04	Pepsico1_Contig26725.mrna2	Zm00001eb067940_T001	0.116622	0.495685	0.235275	Purifying selection
AsGRAS04	Pepsico1_Contig26725.mrna2	Zm00001eb023010_T001	0.137547	0.441578	0.311489	Purifying selection
AsGRAS04	Pepsico1_Contig26725.mrna2	Zm00001eb422620_T001	0.703197	0.930915	0.755382	Purifying selection
AsGRAS05	Pepsico1_Contig13965.mrna2	Zm00001eb399000_T001	0.10892	0.342599	0.317921	Purifying selection
AsGRAS05	Pepsico1_Contig13965.mrna2	Zm00001eb268460_T001	0.187353	0.52113	0.359512	Purifying selection
AsGRAS05	Pepsico1_Contig13965.mrna2	Zm00001eb301410_T001	0.203743	0.752165	0.270875	Purifying selection
AsGRAS05	Pepsico1_Contig13965.mrna2	Zm00001eb164500_T001	0.852254	1.11303	0.765703	Purifying selection
AsGRAS05	Pepsico1_Contig13965.mrna2	Zm00001eb164480_T001	0.910972	0.993926	0.916539	Purifying selection
AsGRAS05	Pepsico1_Contig13965.mrna2	Zm00001eb164480_T002	0.910972	0.993926	0.916539	Purifying selection
AsGRAS05	Pepsico1_Contig13965.mrna2	Zm00001eb011560_T001	0.867713	0.873628	0.993229	Purifying selection
AsGRAS05	Pepsico1_Contig13965.mrna2	Zm00001eb202270_T001	0.798459	2.27496	0.350978	Purifying selection
AsGRAS05	Pepsico1_Contig13965.mrna2	Zm00001eb055700_T001	0.769036	1.33477	0.576158	Purifying selection
AsGRAS05	Pepsico1_Contig13965.mrna2	Zm00001eb325750_T001	0.883906	0.976038	0.905605	Purifying selection
AsGRAS05	Pepsico1_Contig13965.mrna2	Zm00001eb325750_T003	0.883906	0.976038	0.905605	Purifying selection
AsGRAS05	Pepsico1_Contig13965.mrna2	Zm00001eb049620_T001	0.810483	0.864305	0.937728	Purifying selection
AsGRAS05	Pepsico1_Contig13965.mrna2	Zm00001eb325750_T002	0.883906	0.976038	0.905605	Purifying selection
AsGRAS05	Pepsico1_Contig13965.mrna2	Zm00001eb215870_T001	0.741941	1.20079	0.617875	Purifying selection
AsGRAS05	Pepsico1_Contig13965.mrna2	Zm00001eb196430_T001	0.835441	0.831376	1.00489	Purifying selection
AsGRAS05	Pepsico1_Contig13965.mrna2	Zm00001eb133730_T001	0.879359	1.01307	0.868011	Purifying selection
AsGRAS05	Pepsico1_Contig13965.mrna2	Zm00001eb019640_T001	0.896782	0.874521	1.02546	Purifying selection
AsGRAS05	Pepsico1_Contig13965.mrna2	Zm00001eb158520_T001	0.744967	0.896208	0.831243	Purifying selection
AsGRAS05	Pepsico1_Contig13965.mrna2	Zm00001eb266920_T001	1.08224	2.86244	0.378084	Purifying selection
AsGRAS05	Pepsico1_Contig13965.mrna2	Zm00001eb195650_T001	0.775896	0.975203	0.795625	Purifying selection
AsGRAS05	Pepsico1_Contig13965.mrna2	Zm00001eb136350_T001	0.90077	1.06414	0.846474	Purifying selection
AsGRAS05	Pepsico1_Contig13965.mrna2	Zm00001eb136150_T001	0.83269	0.963074	0.864617	Purifying selection
AsGRAS05	Pepsico1_Contig13965.mrna2	Zm00001eb165340_T001	0.948824	1.83153	0.518049	Purifying selection
AsGRAS05	Pepsico1_Contig13965.mrna2	Zm00001eb108090_T001	0.847299	0.965905	0.877207	Purifying selection
AsGRAS05	Pepsico1_Contig13965.mrna2	Zm00001eb379340_T001	0.436715	0.820928	0.531978	Purifying selection
AsGRAS05	Pepsico1_Contig13965.mrna2	Zm00001eb165340_T002	0.963552	1.86076	0.517828	Purifying selection
AsGRAS05	Pepsico1_Contig13965.mrna2	Zm00001eb378590_T001	0.820285	0.779988	1.05166	Purifying selection
AsGRAS05	Pepsico1_Contig13965.mrna2	Zm00001eb054480_T001	0.800799	0.831977	0.962525	Purifying selection
AsGRAS05	Pepsico1_Contig13965.mrna2	Zm00001eb378590_T002	0.820285	0.779988	1.05166	Purifying selection
AsGRAS05	Pepsico1_Contig13965.mrna2	Zm00001eb054480_T002	0.771558	0.810317	0.952169	Purifying selection
AsGRAS05	Pepsico1_Contig13965.mrna2	Zm00001eb405080_T001	0.841846	1.00575	0.837034	Purifying selection
AsGRAS05	Pepsico1_Contig13965.mrna2	Zm00001eb285410_T001	0.811405	1.10732	0.732763	Purifying selection
AsGRAS05	Pepsico1_Contig13965.mrna2	Zm00001eb291930_T001	0.926825	0.896706	1.03359	Purifying selection
AsGRAS05	Pepsico1_Contig13965.mrna2	Zm00001eb000470_T001	0.221664	0.661821	0.33493	Purifying selection
AsGRAS05	Pepsico1_Contig13965.mrna2	Zm00001eb108250_T001	0.847052	0.834112	1.01551	Purifying selection
AsGRAS05	Pepsico1_Contig13965.mrna2	Zm00001eb108250_T002	0.847052	0.834112	1.01551	Purifying selection
AsGRAS05	Pepsico1_Contig13965.mrna2	Zm00001eb170110_T001	0.800046	0.859584	0.930737	Purifying selection
AsGRAS05	Pepsico1_Contig13965.mrna2	Zm00001eb164530_T001	0.905889	1.581	0.572984	Purifying selection
AsGRAS05	Pepsico1_Contig13965.mrna2	Zm00001eb164530_T002	0.911683	2.26861	0.401869	Purifying selection
AsGRAS05	Pepsico1_Contig13965.mrna2	Zm00001eb139470_T001	0.770134	1.12936	0.68192	Purifying selection
AsGRAS05	Pepsico1_Contig13965.mrna2	Zm00001eb392980_T001	0.730322	0.85993	0.849281	Purifying selection
AsGRAS05	Pepsico1_Contig13965.mrna2	Zm00001eb062760_T001	0.997243	2.06079	0.483914	Purifying selection
AsGRAS05	Pepsico1_Contig13965.mrna2	Zm00001eb301400_T001	0.108887	0.357566	0.304522	Purifying selection
AsGRAS05	Pepsico1_Contig13965.mrna2	Zm00001eb148290_T002	0.88578	1.5476	0.572356	Purifying selection
AsGRAS05	Pepsico1_Contig13965.mrna2	Zm00001eb148290_T001	0.88578	1.5476	0.572356	Purifying selection
AsGRAS05	Pepsico1_Contig13965.mrna2	Zm00001eb164350_T001	0.924348	1.1034	0.837725	Purifying selection
AsGRAS05	Pepsico1_Contig13965.mrna2	Zm00001eb236120_T001	0.689292	0.87481	0.787933	Purifying selection
AsGRAS05	Pepsico1_Contig13965.mrna2	Zm00001eb405090_T001	0.896946	1.15252	0.778249	Purifying selection
AsGRAS05	Pepsico1_Contig13965.mrna2	Zm00001eb164470_T001	0.92245	1.44709	0.637451	Purifying selection
AsGRAS05	Pepsico1_Contig13965.mrna2	Zm00001eb187310_T001	0.829751	0.917013	0.904841	Purifying selection
AsGRAS05	Pepsico1_Contig13965.mrna2	Zm00001eb388460_T001	0.82311	0.932126	0.883046	Purifying selection
AsGRAS05	Pepsico1_Contig13965.mrna2	Zm00001eb196420_T001	0.82673	0.753451	1.09726	Purifying selection
AsGRAS05	Pepsico1_Contig13965.mrna2	Zm00001eb136140_T001	0.906631	2.26857	0.399649	Purifying selection
AsGRAS05	Pepsico1_Contig13965.mrna2	Zm00001eb112130_T001	1.01155	1.62279	0.623341	Purifying selection
AsGRAS05	Pepsico1_Contig13965.mrna2	Zm00001eb093670_T002	0.788135	0.810586	0.972302	Purifying selection
AsGRAS05	Pepsico1_Contig13965.mrna2	Zm00001eb093670_T001	0.793534	0.806244	0.984236	Purifying selection
AsGRAS05	Pepsico1_Contig13965.mrna2	Zm00001eb067930_T001	0.348876	0.733509	0.475626	Purifying selection
AsGRAS05	Pepsico1_Contig13965.mrna2	Zm00001eb363140_T001	0.817288	1.03084	0.792835	Purifying selection
AsGRAS05	Pepsico1_Contig13965.mrna2	Zm00001eb266930_T002	1.08606	3.96847	0.273673	Purifying selection
AsGRAS05	Pepsico1_Contig13965.mrna2	Zm00001eb324600_T001	0.710091	0.894395	0.793935	Purifying selection
AsGRAS05	Pepsico1_Contig13965.mrna2	Zm00001eb073130_T001	0.801339	0.994061	0.806127	Purifying selection
AsGRAS05	Pepsico1_Contig13965.mrna2	Zm00001eb115950_T001	0.847463	1.21123	0.69967	Purifying selection
AsGRAS05	Pepsico1_Contig13965.mrna2	Zm00001eb398990_T001	0.19369	0.753908	0.256915	Purifying selection
AsGRAS05	Pepsico1_Contig13965.mrna2	Zm00001eb082700_T001	0.768834	0.855007	0.899214	Purifying selection
AsGRAS05	Pepsico1_Contig13965.mrna2	Zm00001eb107910_T002	0.892598	1.07293	0.831929	Purifying selection
AsGRAS05	Pepsico1_Contig13965.mrna2	Zm00001eb107910_T001	0.892598	1.07293	0.831929	Purifying selection
AsGRAS05	Pepsico1_Contig13965.mrna2	Zm00001eb141310_T001	0.796111	0.941659	0.845435	Purifying selection
AsGRAS05	Pepsico1_Contig13965.mrna2	Zm00001eb326210_T001	0.885917	0.880076	1.00664	Purifying selection
AsGRAS05	Pepsico1_Contig13965.mrna2	Zm00001eb216610_T001	0.768347	0.868664	0.884516	Purifying selection
AsGRAS05	Pepsico1_Contig13965.mrna2	Zm00001eb249840_T001	0.473149	1.5525	0.304766	Purifying selection
AsGRAS05	Pepsico1_Contig13965.mrna2	Zm00001eb428430_T001	0.823407	1.06846	0.770645	Purifying selection
AsGRAS05	Pepsico1_Contig13965.mrna2	Zm00001eb249840_T002	0.442707	1.70204	0.260104	Purifying selection
AsGRAS05	Pepsico1_Contig13965.mrna2	Zm00001eb106490_T001	0.903863	2.1071	0.428962	Purifying selection
AsGRAS05	Pepsico1_Contig13965.mrna2	Zm00001eb081760_T001	0.985552	0.959626	1.02702	Purifying selection
AsGRAS05	Pepsico1_Contig13965.mrna2	Zm00001eb405110_T001	0.803048	0.800168	1.0036	Purifying selection
AsGRAS05	Pepsico1_Contig13965.mrna2	Zm00001eb164490_T001	0.933226	1.06038	0.880084	Purifying selection
AsGRAS05	Pepsico1_Contig13965.mrna2	Zm00001eb074460_T001	0.395199	1.45988	0.270706	Purifying selection
AsGRAS05	Pepsico1_Contig13965.mrna2	Zm00001eb186770_T002	0.424429	1.28055	0.331443	Purifying selection
AsGRAS05	Pepsico1_Contig13965.mrna2	Zm00001eb327300_T001	0.938601	1.50568	0.623376	Purifying selection
AsGRAS05	Pepsico1_Contig13965.mrna2	Zm00001eb326020_T001	0.88271	0.879813	1.00329	Purifying selection
AsGRAS05	Pepsico1_Contig13965.mrna2	Zm00001eb186770_T001	0.407886	1.3506	0.302003	Purifying selection
AsGRAS05	Pepsico1_Contig13965.mrna2	Zm00001eb020850_T001	0.894579	0.959677	0.932167	Purifying selection
AsGRAS05	Pepsico1_Contig13965.mrna2	Zm00001eb186770_T003	0.397326	1.47959	0.268538	Purifying selection
AsGRAS05	Pepsico1_Contig13965.mrna2	Zm00001eb429450_T001	0.396141	1.70585	0.232225	Purifying selection
AsGRAS05	Pepsico1_Contig13965.mrna2	Zm00001eb326550_T001	0.320799	1.35029	0.237578	Purifying selection
AsGRAS05	Pepsico1_Contig13965.mrna2	Zm00001eb029390_T001	0.93045	0.971719	0.95753	Purifying selection
AsGRAS05	Pepsico1_Contig13965.mrna2	Zm00001eb344400_T001	0.865991	2.07842	0.416658	Purifying selection
AsGRAS05	Pepsico1_Contig13965.mrna2	Zm00001eb002990_T001	0.207513	0.603535	0.343829	Purifying selection
AsGRAS05	Pepsico1_Contig13965.mrna2	Zm00001eb291030_T001	0.789511	1.15798	0.681798	Purifying selection
AsGRAS05	Pepsico1_Contig13965.mrna2	Zm00001eb067940_T001	0.116622	0.495685	0.235275	Purifying selection
AsGRAS05	Pepsico1_Contig13965.mrna2	Zm00001eb023010_T001	0.137547	0.441578	0.311489	Purifying selection
AsGRAS05	Pepsico1_Contig13965.mrna2	Zm00001eb422620_T001	0.703197	0.930915	0.755382	Purifying selection
AsGRAS06	Pepsico1_Contig30502.mrna2	Zm00001eb202270_T001	0.875011	3.0184	0.289893	Purifying selection
AsGRAS06	Pepsico1_Contig30502.mrna2	Zm00001eb133730_T001	0.923783	3.40587	0.271232	Purifying selection
AsGRAS06	Pepsico1_Contig30502.mrna2	Zm00001eb308090_T001	0.829454	0.998658	0.830568	Purifying selection
AsGRAS06	Pepsico1_Contig30502.mrna2	Zm00001eb401210_T001	0.178447	0.829293	0.215179	Purifying selection
AsGRAS06	Pepsico1_Contig30502.mrna2	Zm00001eb165340_T002	0.837837	3.45161	0.242738	Purifying selection
AsGRAS06	Pepsico1_Contig30502.mrna2	Zm00001eb355870_T001	0.800686	1.43124	0.559433	Purifying selection
AsGRAS06	Pepsico1_Contig30502.mrna2	Zm00001eb062760_T001	0.769512	2.61671	0.294076	Purifying selection
AsGRAS06	Pepsico1_Contig30502.mrna2	Zm00001eb027720_T001	0.105904	0.625681	0.169263	Purifying selection
AsGRAS06	Pepsico1_Contig30502.mrna2	Zm00001eb027720_T002	0.105904	0.625681	0.169263	Purifying selection
AsGRAS06	Pepsico1_Contig30502.mrna2	Zm00001eb136140_T001	0.813425	2.48564	0.32725	Purifying selection
AsGRAS06	Pepsico1_Contig30502.mrna2	Zm00001eb012280_T001	0.814208	4.21269	0.193275	Purifying selection
AsGRAS06	Pepsico1_Contig30502.mrna2	Zm00001eb249840_T002	0.869624	2.54021	0.342343	Purifying selection
AsGRAS06	Pepsico1_Contig30502.mrna2	Zm00001eb186770_T001	0.845606	2.88722	0.292879	Purifying selection
AsGRAS06	Pepsico1_Contig30502.mrna2	Zm00001eb186770_T003	0.840684	2.99431	0.28076	Purifying selection
AsGRAS07	Pepsico1_Contig18352.mrna2	Zm00001eb202270_T001	0.875011	3.0184	0.289893	Purifying selection
AsGRAS07	Pepsico1_Contig18352.mrna2	Zm00001eb133730_T001	0.923783	3.40587	0.271232	Purifying selection
AsGRAS07	Pepsico1_Contig18352.mrna2	Zm00001eb308090_T001	0.829454	0.998658	0.830568	Purifying selection
AsGRAS07	Pepsico1_Contig18352.mrna2	Zm00001eb401210_T001	0.178447	0.829293	0.215179	Purifying selection
AsGRAS07	Pepsico1_Contig18352.mrna2	Zm00001eb165340_T002	0.837837	3.45161	0.242738	Purifying selection
AsGRAS07	Pepsico1_Contig18352.mrna2	Zm00001eb355870_T001	0.800686	1.43124	0.559433	Purifying selection
AsGRAS07	Pepsico1_Contig18352.mrna2	Zm00001eb062760_T001	0.769512	2.61671	0.294076	Purifying selection
AsGRAS07	Pepsico1_Contig18352.mrna2	Zm00001eb027720_T001	0.105904	0.625681	0.169263	Purifying selection
AsGRAS07	Pepsico1_Contig18352.mrna2	Zm00001eb027720_T002	0.105904	0.625681	0.169263	Purifying selection
AsGRAS07	Pepsico1_Contig18352.mrna2	Zm00001eb136140_T001	0.813425	2.48564	0.32725	Purifying selection
AsGRAS07	Pepsico1_Contig18352.mrna2	Zm00001eb012280_T001	0.814208	4.21269	0.193275	Purifying selection
AsGRAS07	Pepsico1_Contig18352.mrna2	Zm00001eb249840_T002	0.869624	2.54021	0.342343	Purifying selection
AsGRAS07	Pepsico1_Contig18352.mrna2	Zm00001eb186770_T001	0.845606	2.88722	0.292879	Purifying selection
AsGRAS07	Pepsico1_Contig18352.mrna2	Zm00001eb186770_T003	0.840684	2.99431	0.28076	Purifying selection
AsGRAS08	Pepsico1_Contig25100.mrna1	Zm00001eb399000_T001	0.10892	0.342599	0.317921	Purifying selection
AsGRAS08	Pepsico1_Contig25100.mrna1	Zm00001eb268460_T001	0.187353	0.52113	0.359512	Purifying selection
AsGRAS08	Pepsico1_Contig25100.mrna1	Zm00001eb301410_T001	0.203743	0.752165	0.270875	Purifying selection
AsGRAS08	Pepsico1_Contig25100.mrna1	Zm00001eb164500_T001	0.852254	1.11303	0.765703	Purifying selection
AsGRAS08	Pepsico1_Contig25100.mrna1	Zm00001eb164480_T001	0.910963	0.982605	0.92709	Purifying selection
AsGRAS08	Pepsico1_Contig25100.mrna1	Zm00001eb164480_T002	0.910963	0.982605	0.92709	Purifying selection
AsGRAS08	Pepsico1_Contig25100.mrna1	Zm00001eb011560_T001	0.867713	0.873628	0.993229	Purifying selection
AsGRAS08	Pepsico1_Contig25100.mrna1	Zm00001eb202270_T001	0.798459	2.27496	0.350978	Purifying selection
AsGRAS08	Pepsico1_Contig25100.mrna1	Zm00001eb055700_T001	0.76437	1.37237	0.55697	Purifying selection
AsGRAS08	Pepsico1_Contig25100.mrna1	Zm00001eb325750_T001	0.89662	0.997286	0.89906	Purifying selection
AsGRAS08	Pepsico1_Contig25100.mrna1	Zm00001eb325750_T003	0.89662	0.997286	0.89906	Purifying selection
AsGRAS08	Pepsico1_Contig25100.mrna1	Zm00001eb049620_T001	0.810483	0.864305	0.937728	Purifying selection
AsGRAS08	Pepsico1_Contig25100.mrna1	Zm00001eb325750_T002	0.89662	0.997286	0.89906	Purifying selection
AsGRAS08	Pepsico1_Contig25100.mrna1	Zm00001eb215870_T001	0.734963	1.19479	0.615142	Purifying selection
AsGRAS08	Pepsico1_Contig25100.mrna1	Zm00001eb196430_T001	0.835441	0.831376	1.00489	Purifying selection
AsGRAS08	Pepsico1_Contig25100.mrna1	Zm00001eb133730_T001	0.879359	1.01307	0.868011	Purifying selection
AsGRAS08	Pepsico1_Contig25100.mrna1	Zm00001eb019640_T001	0.896782	0.874521	1.02546	Purifying selection
AsGRAS08	Pepsico1_Contig25100.mrna1	Zm00001eb158520_T001	0.744967	0.896208	0.831243	Purifying selection
AsGRAS08	Pepsico1_Contig25100.mrna1	Zm00001eb266920_T001	1.10335	2.70909	0.407276	Purifying selection
AsGRAS08	Pepsico1_Contig25100.mrna1	Zm00001eb195650_T001	0.775896	0.975203	0.795625	Purifying selection
AsGRAS08	Pepsico1_Contig25100.mrna1	Zm00001eb136350_T001	0.90077	1.06414	0.846474	Purifying selection
AsGRAS08	Pepsico1_Contig25100.mrna1	Zm00001eb136150_T001	0.83269	0.963074	0.864617	Purifying selection
AsGRAS08	Pepsico1_Contig25100.mrna1	Zm00001eb165340_T001	0.971487	1.95815	0.496126	Purifying selection
AsGRAS08	Pepsico1_Contig25100.mrna1	Zm00001eb108090_T001	0.847299	0.965905	0.877207	Purifying selection
AsGRAS08	Pepsico1_Contig25100.mrna1	Zm00001eb379340_T001	0.434975	0.820928	0.529858	Purifying selection
AsGRAS08	Pepsico1_Contig25100.mrna1	Zm00001eb165340_T002	0.963552	1.86076	0.517828	Purifying selection
AsGRAS08	Pepsico1_Contig25100.mrna1	Zm00001eb378590_T001	0.808931	0.752463	1.07504	Purifying selection
AsGRAS08	Pepsico1_Contig25100.mrna1	Zm00001eb054480_T001	0.800799	0.831977	0.962525	Purifying selection
AsGRAS08	Pepsico1_Contig25100.mrna1	Zm00001eb378590_T002	0.808931	0.752463	1.07504	Purifying selection
AsGRAS08	Pepsico1_Contig25100.mrna1	Zm00001eb054480_T002	0.771558	0.810317	0.952169	Purifying selection
AsGRAS08	Pepsico1_Contig25100.mrna1	Zm00001eb405080_T001	0.841846	1.00575	0.837034	Purifying selection
AsGRAS08	Pepsico1_Contig25100.mrna1	Zm00001eb285410_T001	0.811405	1.10732	0.732763	Purifying selection
AsGRAS08	Pepsico1_Contig25100.mrna1	Zm00001eb291930_T001	0.926825	0.896706	1.03359	Purifying selection
AsGRAS08	Pepsico1_Contig25100.mrna1	Zm00001eb000470_T001	0.221664	0.661821	0.33493	Purifying selection
AsGRAS08	Pepsico1_Contig25100.mrna1	Zm00001eb108250_T001	0.847052	0.834112	1.01551	Purifying selection
AsGRAS08	Pepsico1_Contig25100.mrna1	Zm00001eb108250_T002	0.847052	0.834112	1.01551	Purifying selection
AsGRAS08	Pepsico1_Contig25100.mrna1	Zm00001eb170110_T001	0.828058	0.876591	0.944634	Purifying selection
AsGRAS08	Pepsico1_Contig25100.mrna1	Zm00001eb164530_T001	0.920218	1.58483	0.580641	Purifying selection
AsGRAS08	Pepsico1_Contig25100.mrna1	Zm00001eb164530_T002	0.911683	2.26861	0.401869	Purifying selection
AsGRAS08	Pepsico1_Contig25100.mrna1	Zm00001eb139470_T001	0.770134	1.12936	0.68192	Purifying selection
AsGRAS08	Pepsico1_Contig25100.mrna1	Zm00001eb392980_T001	0.766485	0.85428	0.897229	Purifying selection
AsGRAS08	Pepsico1_Contig25100.mrna1	Zm00001eb062760_T001	0.997243	2.06079	0.483914	Purifying selection
AsGRAS08	Pepsico1_Contig25100.mrna1	Zm00001eb301400_T001	0.108887	0.357566	0.304522	Purifying selection
AsGRAS08	Pepsico1_Contig25100.mrna1	Zm00001eb148290_T002	0.868712	1.64859	0.526943	Purifying selection
AsGRAS08	Pepsico1_Contig25100.mrna1	Zm00001eb148290_T001	0.868712	1.64859	0.526943	Purifying selection
AsGRAS08	Pepsico1_Contig25100.mrna1	Zm00001eb164350_T001	0.924348	1.1034	0.837725	Purifying selection
AsGRAS08	Pepsico1_Contig25100.mrna1	Zm00001eb236120_T001	0.689292	0.87481	0.787933	Purifying selection
AsGRAS08	Pepsico1_Contig25100.mrna1	Zm00001eb405090_T001	0.896946	1.15252	0.778249	Purifying selection
AsGRAS08	Pepsico1_Contig25100.mrna1	Zm00001eb164470_T001	0.92245	1.44709	0.637451	Purifying selection
AsGRAS08	Pepsico1_Contig25100.mrna1	Zm00001eb187310_T001	0.814676	0.999031	0.815466	Purifying selection
AsGRAS08	Pepsico1_Contig25100.mrna1	Zm00001eb388460_T001	0.82311	0.932126	0.883046	Purifying selection
AsGRAS08	Pepsico1_Contig25100.mrna1	Zm00001eb196420_T001	0.82673	0.753451	1.09726	Purifying selection
AsGRAS08	Pepsico1_Contig25100.mrna1	Zm00001eb136140_T001	0.906631	2.26857	0.399649	Purifying selection
AsGRAS08	Pepsico1_Contig25100.mrna1	Zm00001eb112130_T001	1.01155	1.62279	0.623341	Purifying selection
AsGRAS08	Pepsico1_Contig25100.mrna1	Zm00001eb093670_T002	0.788135	0.810586	0.972302	Purifying selection
AsGRAS08	Pepsico1_Contig25100.mrna1	Zm00001eb093670_T001	0.793534	0.806244	0.984236	Purifying selection
AsGRAS08	Pepsico1_Contig25100.mrna1	Zm00001eb067930_T001	0.348876	0.733509	0.475626	Purifying selection
AsGRAS08	Pepsico1_Contig25100.mrna1	Zm00001eb363140_T001	0.817288	1.03084	0.792835	Purifying selection
AsGRAS08	Pepsico1_Contig25100.mrna1	Zm00001eb266930_T002	0.963597	2.73191	0.352719	Purifying selection
AsGRAS08	Pepsico1_Contig25100.mrna1	Zm00001eb324600_T001	0.710091	0.894395	0.793935	Purifying selection
AsGRAS08	Pepsico1_Contig25100.mrna1	Zm00001eb073130_T001	0.804271	1.01092	0.795582	Purifying selection
AsGRAS08	Pepsico1_Contig25100.mrna1	Zm00001eb115950_T001	0.861142	1.18705	0.725445	Purifying selection
AsGRAS08	Pepsico1_Contig25100.mrna1	Zm00001eb398990_T001	0.19369	0.753908	0.256915	Purifying selection
AsGRAS08	Pepsico1_Contig25100.mrna1	Zm00001eb082700_T001	0.768834	0.855007	0.899214	Purifying selection
AsGRAS08	Pepsico1_Contig25100.mrna1	Zm00001eb107910_T002	0.879424	1.10051	0.799107	Purifying selection
AsGRAS08	Pepsico1_Contig25100.mrna1	Zm00001eb107910_T001	0.879424	1.10051	0.799107	Purifying selection
AsGRAS08	Pepsico1_Contig25100.mrna1	Zm00001eb141310_T001	0.796111	0.941659	0.845435	Purifying selection
AsGRAS08	Pepsico1_Contig25100.mrna1	Zm00001eb326210_T001	0.885917	0.880076	1.00664	Purifying selection
AsGRAS08	Pepsico1_Contig25100.mrna1	Zm00001eb216610_T001	0.760199	0.878668	0.865172	Purifying selection
AsGRAS08	Pepsico1_Contig25100.mrna1	Zm00001eb249840_T001	0.473149	1.5525	0.304766	Purifying selection
AsGRAS08	Pepsico1_Contig25100.mrna1	Zm00001eb428430_T001	0.82688	1.03947	0.795483	Purifying selection
AsGRAS08	Pepsico1_Contig25100.mrna1	Zm00001eb249840_T002	0.442707	1.70204	0.260104	Purifying selection
AsGRAS08	Pepsico1_Contig25100.mrna1	Zm00001eb106490_T001	0.90844	2.07944	0.436868	Purifying selection
AsGRAS08	Pepsico1_Contig25100.mrna1	Zm00001eb081760_T001	0.985552	0.959626	1.02702	Purifying selection
AsGRAS08	Pepsico1_Contig25100.mrna1	Zm00001eb405110_T001	0.803048	0.800168	1.0036	Purifying selection
AsGRAS08	Pepsico1_Contig25100.mrna1	Zm00001eb164490_T001	0.933226	1.06038	0.880084	Purifying selection
AsGRAS08	Pepsico1_Contig25100.mrna1	Zm00001eb074460_T001	0.408347	1.47384	0.277064	Purifying selection
AsGRAS08	Pepsico1_Contig25100.mrna1	Zm00001eb186770_T002	0.424429	1.28055	0.331443	Purifying selection
AsGRAS08	Pepsico1_Contig25100.mrna1	Zm00001eb327300_T001	0.938601	1.50568	0.623376	Purifying selection
AsGRAS08	Pepsico1_Contig25100.mrna1	Zm00001eb326020_T001	0.88271	0.879813	1.00329	Purifying selection
AsGRAS08	Pepsico1_Contig25100.mrna1	Zm00001eb186770_T001	0.407886	1.3506	0.302003	Purifying selection
AsGRAS08	Pepsico1_Contig25100.mrna1	Zm00001eb020850_T001	0.885897	0.945839	0.936625	Purifying selection
AsGRAS08	Pepsico1_Contig25100.mrna1	Zm00001eb186770_T003	0.397326	1.47959	0.268538	Purifying selection
AsGRAS08	Pepsico1_Contig25100.mrna1	Zm00001eb429450_T001	0.396141	1.70585	0.232225	Purifying selection
AsGRAS08	Pepsico1_Contig25100.mrna1	Zm00001eb326550_T001	0.320799	1.35029	0.237578	Purifying selection
AsGRAS08	Pepsico1_Contig25100.mrna1	Zm00001eb029390_T001	0.93045	0.971719	0.95753	Purifying selection
AsGRAS08	Pepsico1_Contig25100.mrna1	Zm00001eb344400_T001	0.865991	2.07842	0.416658	Purifying selection
AsGRAS08	Pepsico1_Contig25100.mrna1	Zm00001eb002990_T001	0.207513	0.603535	0.343829	Purifying selection
AsGRAS08	Pepsico1_Contig25100.mrna1	Zm00001eb291030_T001	0.789511	1.15798	0.681798	Purifying selection
AsGRAS08	Pepsico1_Contig25100.mrna1	Zm00001eb067940_T001	0.116622	0.495685	0.235275	Purifying selection
AsGRAS08	Pepsico1_Contig25100.mrna1	Zm00001eb023010_T001	0.141695	0.442734	0.320045	Purifying selection
AsGRAS08	Pepsico1_Contig25100.mrna1	Zm00001eb422620_T001	0.703197	0.930915	0.755382	Purifying selection
AsGRAS09	Pepsico2_Contig4966.mrna2	Zm00001eb399000_T001	1.02143	1.05473	0.968435	Purifying selection
AsGRAS09	Pepsico2_Contig4966.mrna2	Zm00001eb268460_T001	0.997148	1.28737	0.77456	Purifying selection
AsGRAS09	Pepsico2_Contig4966.mrna2	Zm00001eb301410_T001	0.983418	0.956289	1.02837	Purifying selection
AsGRAS09	Pepsico2_Contig4966.mrna2	Zm00001eb164500_T001	0.98823	1.24055	0.796606	Purifying selection
AsGRAS09	Pepsico2_Contig4966.mrna2	Zm00001eb164480_T001	1.05471	0.994679	1.06036	Purifying selection
AsGRAS09	Pepsico2_Contig4966.mrna2	Zm00001eb164480_T002	1.05471	0.994679	1.06036	Purifying selection
AsGRAS09	Pepsico2_Contig4966.mrna2	Zm00001eb011560_T001	0.831563	1.03673	0.802102	Purifying selection
AsGRAS09	Pepsico2_Contig4966.mrna2	Zm00001eb055700_T001	0.844732	1.10858	0.761997	Purifying selection
AsGRAS09	Pepsico2_Contig4966.mrna2	Zm00001eb325750_T001	0.852057	1.13583	0.750162	Purifying selection
AsGRAS09	Pepsico2_Contig4966.mrna2	Zm00001eb325750_T003	0.852057	1.13583	0.750162	Purifying selection
AsGRAS09	Pepsico2_Contig4966.mrna2	Zm00001eb049620_T001	0.895512	1.14394	0.782829	Purifying selection
AsGRAS09	Pepsico2_Contig4966.mrna2	Zm00001eb325750_T002	0.852057	1.13583	0.750162	Purifying selection
AsGRAS09	Pepsico2_Contig4966.mrna2	Zm00001eb215870_T001	0.804396	1.21688	0.661033	Purifying selection
AsGRAS09	Pepsico2_Contig4966.mrna2	Zm00001eb196430_T001	1.00457	0.874826	1.14831	Purifying selection
AsGRAS09	Pepsico2_Contig4966.mrna2	Zm00001eb133730_T001	0.686872	1.32652	0.517798	Purifying selection
AsGRAS09	Pepsico2_Contig4966.mrna2	Zm00001eb019640_T001	0.757892	1.16133	0.652605	Purifying selection
AsGRAS09	Pepsico2_Contig4966.mrna2	Zm00001eb158520_T001	0.477197	0.916861	0.520468	Purifying selection
AsGRAS09	Pepsico2_Contig4966.mrna2	Zm00001eb266920_T001	1.03211	2.00876	0.513805	Purifying selection
AsGRAS09	Pepsico2_Contig4966.mrna2	Zm00001eb195650_T001	0.73203	1.14814	0.637576	Purifying selection
AsGRAS09	Pepsico2_Contig4966.mrna2	Zm00001eb136350_T001	1.01356	1.09128	0.928772	Purifying selection
AsGRAS09	Pepsico2_Contig4966.mrna2	Zm00001eb136150_T001	0.828729	2.05724	0.402835	Purifying selection
AsGRAS09	Pepsico2_Contig4966.mrna2	Zm00001eb165340_T001	1.20866	2.92873	0.412692	Purifying selection
AsGRAS09	Pepsico2_Contig4966.mrna2	Zm00001eb108090_T001	0.910533	1.24876	0.729152	Purifying selection
AsGRAS09	Pepsico2_Contig4966.mrna2	Zm00001eb379340_T001	0.795624	0.798351	0.996584	Purifying selection
AsGRAS09	Pepsico2_Contig4966.mrna2	Zm00001eb165340_T002	1.20866	2.92873	0.412692	Purifying selection
AsGRAS09	Pepsico2_Contig4966.mrna2	Zm00001eb378590_T001	0.825264	1.00751	0.81911	Purifying selection
AsGRAS09	Pepsico2_Contig4966.mrna2	Zm00001eb054480_T001	0.742529	1.03412	0.718029	Purifying selection
AsGRAS09	Pepsico2_Contig4966.mrna2	Zm00001eb378590_T002	0.825264	1.00751	0.81911	Purifying selection
AsGRAS09	Pepsico2_Contig4966.mrna2	Zm00001eb054480_T002	0.703598	1.14005	0.617165	Purifying selection
AsGRAS09	Pepsico2_Contig4966.mrna2	Zm00001eb405080_T001	0.841061	1.06485	0.789838	Purifying selection
AsGRAS09	Pepsico2_Contig4966.mrna2	Zm00001eb285410_T001	0.818705	1.78073	0.459758	Purifying selection
AsGRAS09	Pepsico2_Contig4966.mrna2	Zm00001eb291930_T001	0.843924	0.829035	1.01796	Purifying selection
AsGRAS09	Pepsico2_Contig4966.mrna2	Zm00001eb000470_T001	1.00281	0.932936	1.0749	Purifying selection
AsGRAS09	Pepsico2_Contig4966.mrna2	Zm00001eb108250_T001	0.893204	1.26316	0.707119	Purifying selection
AsGRAS09	Pepsico2_Contig4966.mrna2	Zm00001eb108250_T002	0.893204	1.26316	0.707119	Purifying selection
AsGRAS09	Pepsico2_Contig4966.mrna2	Zm00001eb170110_T001	0.727483	0.909891	0.799528	Purifying selection
AsGRAS09	Pepsico2_Contig4966.mrna2	Zm00001eb164530_T001	1.10129	1.43028	0.76998	Purifying selection
AsGRAS09	Pepsico2_Contig4966.mrna2	Zm00001eb164530_T002	1.10529	1.56661	0.70553	Purifying selection
AsGRAS09	Pepsico2_Contig4966.mrna2	Zm00001eb139470_T001	0.845108	1.13004	0.747857	Purifying selection
AsGRAS09	Pepsico2_Contig4966.mrna2	Zm00001eb392980_T001	0.90117	0.944485	0.954139	Purifying selection
AsGRAS09	Pepsico2_Contig4966.mrna2	Zm00001eb062760_T001	0.947187	1.68816	0.561077	Purifying selection
AsGRAS09	Pepsico2_Contig4966.mrna2	Zm00001eb301400_T001	1.02483	1.08704	0.942774	Purifying selection
AsGRAS09	Pepsico2_Contig4966.mrna2	Zm00001eb148290_T002	0.813054	2.93525	0.276996	Purifying selection
AsGRAS09	Pepsico2_Contig4966.mrna2	Zm00001eb148290_T001	0.813054	2.93525	0.276996	Purifying selection
AsGRAS09	Pepsico2_Contig4966.mrna2	Zm00001eb164350_T001	1.10241	1.52621	0.722317	Purifying selection
AsGRAS09	Pepsico2_Contig4966.mrna2	Zm00001eb236120_T001	0.78792	1.07487	0.733038	Purifying selection
AsGRAS09	Pepsico2_Contig4966.mrna2	Zm00001eb405090_T001	1.13724	1.04839	1.08474	Purifying selection
AsGRAS09	Pepsico2_Contig4966.mrna2	Zm00001eb164470_T001	0.954648	2.35465	0.405431	Purifying selection
AsGRAS09	Pepsico2_Contig4966.mrna2	Zm00001eb187310_T001	0.972205	1.04574	0.929677	Purifying selection
AsGRAS09	Pepsico2_Contig4966.mrna2	Zm00001eb388460_T001	0.768889	1.00654	0.763893	Purifying selection
AsGRAS09	Pepsico2_Contig4966.mrna2	Zm00001eb049880_T001	0.924177	2.3245	0.397581	Purifying selection
AsGRAS09	Pepsico2_Contig4966.mrna2	Zm00001eb196420_T001	0.912163	1.2542	0.727287	Purifying selection
AsGRAS09	Pepsico2_Contig4966.mrna2	Zm00001eb136140_T001	1.02013	1.53098	0.666326	Purifying selection
AsGRAS09	Pepsico2_Contig4966.mrna2	Zm00001eb112130_T001	1.08103	2.87381	0.376167	Purifying selection
AsGRAS09	Pepsico2_Contig4966.mrna2	Zm00001eb093670_T002	0.754373	1.06694	0.707045	Purifying selection
AsGRAS09	Pepsico2_Contig4966.mrna2	Zm00001eb093670_T001	0.754373	1.06694	0.707045	Purifying selection
AsGRAS09	Pepsico2_Contig4966.mrna2	Zm00001eb067930_T001	0.87098	1.58864	0.548255	Purifying selection
AsGRAS09	Pepsico2_Contig4966.mrna2	Zm00001eb363140_T001	0.865123	0.916979	0.943449	Purifying selection
AsGRAS09	Pepsico2_Contig4966.mrna2	Zm00001eb324600_T001	0.768909	0.837812	0.917759	Purifying selection
AsGRAS09	Pepsico2_Contig4966.mrna2	Zm00001eb073130_T001	0.898852	1.21888	0.737439	Purifying selection
AsGRAS09	Pepsico2_Contig4966.mrna2	Zm00001eb115950_T001	0.925027	1.13307	0.81639	Purifying selection
AsGRAS09	Pepsico2_Contig4966.mrna2	Zm00001eb398990_T001	0.954461	1.07532	0.887606	Purifying selection
AsGRAS09	Pepsico2_Contig4966.mrna2	Zm00001eb082700_T001	0.512695	0.571605	0.896939	Purifying selection
AsGRAS09	Pepsico2_Contig4966.mrna2	Zm00001eb107910_T002	0.824231	2.60524	0.316375	Purifying selection
AsGRAS09	Pepsico2_Contig4966.mrna2	Zm00001eb107910_T001	0.824231	2.60524	0.316375	Purifying selection
AsGRAS09	Pepsico2_Contig4966.mrna2	Zm00001eb141310_T001	0.833983	0.759883	1.09752	Purifying selection
AsGRAS09	Pepsico2_Contig4966.mrna2	Zm00001eb326210_T001	0.901535	0.978142	0.921681	Purifying selection
AsGRAS09	Pepsico2_Contig4966.mrna2	Zm00001eb216610_T001	0.732441	0.911429	0.803618	Purifying selection
AsGRAS09	Pepsico2_Contig4966.mrna2	Zm00001eb249840_T001	0.942714	1.33548	0.705901	Purifying selection
AsGRAS09	Pepsico2_Contig4966.mrna2	Zm00001eb428430_T001	0.835768	1.48016	0.564646	Purifying selection
AsGRAS09	Pepsico2_Contig4966.mrna2	Zm00001eb249840_T002	0.942714	1.33548	0.705901	Purifying selection
AsGRAS09	Pepsico2_Contig4966.mrna2	Zm00001eb081760_T001	0.850219	1.00715	0.844184	Purifying selection
AsGRAS09	Pepsico2_Contig4966.mrna2	Zm00001eb405110_T001	0.896074	0.910981	0.983637	Purifying selection
AsGRAS09	Pepsico2_Contig4966.mrna2	Zm00001eb164490_T001	0.941121	1.3407	0.701962	Purifying selection
AsGRAS09	Pepsico2_Contig4966.mrna2	Zm00001eb074460_T001	0.858355	1.38012	0.62194	Purifying selection
AsGRAS09	Pepsico2_Contig4966.mrna2	Zm00001eb186770_T002	0.962636	1.38361	0.695745	Purifying selection
AsGRAS09	Pepsico2_Contig4966.mrna2	Zm00001eb327300_T001	0.831396	1.36088	0.610923	Purifying selection
AsGRAS09	Pepsico2_Contig4966.mrna2	Zm00001eb326020_T001	0.919007	1.19801	0.767109	Purifying selection
AsGRAS09	Pepsico2_Contig4966.mrna2	Zm00001eb186770_T001	0.962636	1.38361	0.695745	Purifying selection
AsGRAS09	Pepsico2_Contig4966.mrna2	Zm00001eb020850_T001	0.990712	0.892264	1.11033	Purifying selection
AsGRAS09	Pepsico2_Contig4966.mrna2	Zm00001eb186770_T003	0.962636	1.38361	0.695745	Purifying selection
AsGRAS09	Pepsico2_Contig4966.mrna2	Zm00001eb429450_T001	0.878801	1.82102	0.482586	Purifying selection
AsGRAS09	Pepsico2_Contig4966.mrna2	Zm00001eb326550_T001	0.946583	1.39263	0.679707	Purifying selection
AsGRAS09	Pepsico2_Contig4966.mrna2	Zm00001eb029390_T001	0.982731	0.974462	1.00849	Purifying selection
AsGRAS09	Pepsico2_Contig4966.mrna2	Zm00001eb344400_T001	0.60476	1.6603	0.364249	Purifying selection
AsGRAS09	Pepsico2_Contig4966.mrna2	Zm00001eb002990_T001	0.823129	1.6658	0.494133	Purifying selection
AsGRAS09	Pepsico2_Contig4966.mrna2	Zm00001eb291030_T001	0.912892	1.02677	0.889094	Purifying selection
AsGRAS09	Pepsico2_Contig4966.mrna2	Zm00001eb067940_T001	0.968426	0.830209	1.16648	Purifying selection
AsGRAS09	Pepsico2_Contig4966.mrna2	Zm00001eb023010_T001	0.798095	1.10984	0.719109	Purifying selection
AsGRAS09	Pepsico2_Contig4966.mrna2	Zm00001eb422620_T001	0.52463	1.19516	0.438962	Purifying selection
AsGRAS10	Pepsico2_Contig7359.mrna1	Zm00001eb399000_T001	0.10892	0.342599	0.317921	Purifying selection
AsGRAS10	Pepsico2_Contig7359.mrna1	Zm00001eb268460_T001	0.187353	0.52113	0.359512	Purifying selection
AsGRAS10	Pepsico2_Contig7359.mrna1	Zm00001eb301410_T001	0.203743	0.752165	0.270875	Purifying selection
AsGRAS10	Pepsico2_Contig7359.mrna1	Zm00001eb164500_T001	0.852254	1.11303	0.765703	Purifying selection
AsGRAS10	Pepsico2_Contig7359.mrna1	Zm00001eb164480_T001	0.910963	0.982605	0.92709	Purifying selection
AsGRAS10	Pepsico2_Contig7359.mrna1	Zm00001eb164480_T002	0.910963	0.982605	0.92709	Purifying selection
AsGRAS10	Pepsico2_Contig7359.mrna1	Zm00001eb011560_T001	0.867713	0.873628	0.993229	Purifying selection
AsGRAS10	Pepsico2_Contig7359.mrna1	Zm00001eb202270_T001	0.798459	2.27496	0.350978	Purifying selection
AsGRAS10	Pepsico2_Contig7359.mrna1	Zm00001eb055700_T001	0.76437	1.37237	0.55697	Purifying selection
AsGRAS10	Pepsico2_Contig7359.mrna1	Zm00001eb325750_T001	0.89662	0.997286	0.89906	Purifying selection
AsGRAS10	Pepsico2_Contig7359.mrna1	Zm00001eb325750_T003	0.89662	0.997286	0.89906	Purifying selection
AsGRAS10	Pepsico2_Contig7359.mrna1	Zm00001eb049620_T001	0.810483	0.864305	0.937728	Purifying selection
AsGRAS10	Pepsico2_Contig7359.mrna1	Zm00001eb325750_T002	0.89662	0.997286	0.89906	Purifying selection
AsGRAS10	Pepsico2_Contig7359.mrna1	Zm00001eb215870_T001	0.734963	1.19479	0.615142	Purifying selection
AsGRAS10	Pepsico2_Contig7359.mrna1	Zm00001eb196430_T001	0.835441	0.831376	1.00489	Purifying selection
AsGRAS10	Pepsico2_Contig7359.mrna1	Zm00001eb133730_T001	0.879359	1.01307	0.868011	Purifying selection
AsGRAS10	Pepsico2_Contig7359.mrna1	Zm00001eb019640_T001	0.896782	0.874521	1.02546	Purifying selection
AsGRAS10	Pepsico2_Contig7359.mrna1	Zm00001eb158520_T001	0.744967	0.896208	0.831243	Purifying selection
AsGRAS10	Pepsico2_Contig7359.mrna1	Zm00001eb266920_T001	1.10335	2.70909	0.407276	Purifying selection
AsGRAS10	Pepsico2_Contig7359.mrna1	Zm00001eb195650_T001	0.775896	0.975203	0.795625	Purifying selection
AsGRAS10	Pepsico2_Contig7359.mrna1	Zm00001eb136350_T001	0.90077	1.06414	0.846474	Purifying selection
AsGRAS10	Pepsico2_Contig7359.mrna1	Zm00001eb136150_T001	0.83269	0.963074	0.864617	Purifying selection
AsGRAS10	Pepsico2_Contig7359.mrna1	Zm00001eb165340_T001	0.971487	1.95815	0.496126	Purifying selection
AsGRAS10	Pepsico2_Contig7359.mrna1	Zm00001eb108090_T001	0.847299	0.965905	0.877207	Purifying selection
AsGRAS10	Pepsico2_Contig7359.mrna1	Zm00001eb379340_T001	0.434975	0.820928	0.529858	Purifying selection
AsGRAS10	Pepsico2_Contig7359.mrna1	Zm00001eb165340_T002	0.963552	1.86076	0.517828	Purifying selection
AsGRAS10	Pepsico2_Contig7359.mrna1	Zm00001eb378590_T001	0.808931	0.752463	1.07504	Purifying selection
AsGRAS10	Pepsico2_Contig7359.mrna1	Zm00001eb054480_T001	0.800799	0.831977	0.962525	Purifying selection
AsGRAS10	Pepsico2_Contig7359.mrna1	Zm00001eb378590_T002	0.808931	0.752463	1.07504	Purifying selection
AsGRAS10	Pepsico2_Contig7359.mrna1	Zm00001eb054480_T002	0.771558	0.810317	0.952169	Purifying selection
AsGRAS10	Pepsico2_Contig7359.mrna1	Zm00001eb405080_T001	0.841846	1.00575	0.837034	Purifying selection
AsGRAS10	Pepsico2_Contig7359.mrna1	Zm00001eb285410_T001	0.811405	1.10732	0.732763	Purifying selection
AsGRAS10	Pepsico2_Contig7359.mrna1	Zm00001eb291930_T001	0.926825	0.896706	1.03359	Purifying selection
AsGRAS10	Pepsico2_Contig7359.mrna1	Zm00001eb000470_T001	0.221664	0.661821	0.33493	Purifying selection
AsGRAS10	Pepsico2_Contig7359.mrna1	Zm00001eb108250_T001	0.847052	0.834112	1.01551	Purifying selection
AsGRAS10	Pepsico2_Contig7359.mrna1	Zm00001eb108250_T002	0.847052	0.834112	1.01551	Purifying selection
AsGRAS10	Pepsico2_Contig7359.mrna1	Zm00001eb170110_T001	0.828058	0.876591	0.944634	Purifying selection
AsGRAS10	Pepsico2_Contig7359.mrna1	Zm00001eb164530_T001	0.920218	1.58483	0.580641	Purifying selection
AsGRAS10	Pepsico2_Contig7359.mrna1	Zm00001eb164530_T002	0.911683	2.26861	0.401869	Purifying selection
AsGRAS10	Pepsico2_Contig7359.mrna1	Zm00001eb139470_T001	0.770134	1.12936	0.68192	Purifying selection
AsGRAS10	Pepsico2_Contig7359.mrna1	Zm00001eb392980_T001	0.766485	0.85428	0.897229	Purifying selection
AsGRAS10	Pepsico2_Contig7359.mrna1	Zm00001eb062760_T001	0.997243	2.06079	0.483914	Purifying selection
AsGRAS10	Pepsico2_Contig7359.mrna1	Zm00001eb301400_T001	0.108887	0.357566	0.304522	Purifying selection
AsGRAS10	Pepsico2_Contig7359.mrna1	Zm00001eb148290_T002	0.868712	1.64859	0.526943	Purifying selection
AsGRAS10	Pepsico2_Contig7359.mrna1	Zm00001eb148290_T001	0.868712	1.64859	0.526943	Purifying selection
AsGRAS10	Pepsico2_Contig7359.mrna1	Zm00001eb164350_T001	0.924348	1.1034	0.837725	Purifying selection
AsGRAS10	Pepsico2_Contig7359.mrna1	Zm00001eb236120_T001	0.689292	0.87481	0.787933	Purifying selection
AsGRAS10	Pepsico2_Contig7359.mrna1	Zm00001eb405090_T001	0.896946	1.15252	0.778249	Purifying selection
AsGRAS10	Pepsico2_Contig7359.mrna1	Zm00001eb164470_T001	0.92245	1.44709	0.637451	Purifying selection
AsGRAS10	Pepsico2_Contig7359.mrna1	Zm00001eb187310_T001	0.814676	0.999031	0.815466	Purifying selection
AsGRAS10	Pepsico2_Contig7359.mrna1	Zm00001eb388460_T001	0.82311	0.932126	0.883046	Purifying selection
AsGRAS10	Pepsico2_Contig7359.mrna1	Zm00001eb196420_T001	0.82673	0.753451	1.09726	Purifying selection
AsGRAS10	Pepsico2_Contig7359.mrna1	Zm00001eb136140_T001	0.906631	2.26857	0.399649	Purifying selection
AsGRAS10	Pepsico2_Contig7359.mrna1	Zm00001eb112130_T001	1.01155	1.62279	0.623341	Purifying selection
AsGRAS10	Pepsico2_Contig7359.mrna1	Zm00001eb093670_T002	0.788135	0.810586	0.972302	Purifying selection
AsGRAS10	Pepsico2_Contig7359.mrna1	Zm00001eb093670_T001	0.793534	0.806244	0.984236	Purifying selection
AsGRAS10	Pepsico2_Contig7359.mrna1	Zm00001eb067930_T001	0.348876	0.733509	0.475626	Purifying selection
AsGRAS10	Pepsico2_Contig7359.mrna1	Zm00001eb363140_T001	0.817288	1.03084	0.792835	Purifying selection
AsGRAS10	Pepsico2_Contig7359.mrna1	Zm00001eb266930_T002	0.963597	2.73191	0.352719	Purifying selection
AsGRAS10	Pepsico2_Contig7359.mrna1	Zm00001eb324600_T001	0.710091	0.894395	0.793935	Purifying selection
AsGRAS10	Pepsico2_Contig7359.mrna1	Zm00001eb073130_T001	0.804271	1.01092	0.795582	Purifying selection
AsGRAS10	Pepsico2_Contig7359.mrna1	Zm00001eb115950_T001	0.861142	1.18705	0.725445	Purifying selection
AsGRAS10	Pepsico2_Contig7359.mrna1	Zm00001eb398990_T001	0.19369	0.753908	0.256915	Purifying selection
AsGRAS10	Pepsico2_Contig7359.mrna1	Zm00001eb082700_T001	0.768834	0.855007	0.899214	Purifying selection
AsGRAS10	Pepsico2_Contig7359.mrna1	Zm00001eb107910_T002	0.879424	1.10051	0.799107	Purifying selection
AsGRAS10	Pepsico2_Contig7359.mrna1	Zm00001eb107910_T001	0.879424	1.10051	0.799107	Purifying selection
AsGRAS10	Pepsico2_Contig7359.mrna1	Zm00001eb141310_T001	0.796111	0.941659	0.845435	Purifying selection
AsGRAS10	Pepsico2_Contig7359.mrna1	Zm00001eb326210_T001	0.885917	0.880076	1.00664	Purifying selection
AsGRAS10	Pepsico2_Contig7359.mrna1	Zm00001eb216610_T001	0.760199	0.878668	0.865172	Purifying selection
AsGRAS10	Pepsico2_Contig7359.mrna1	Zm00001eb249840_T001	0.473149	1.5525	0.304766	Purifying selection
AsGRAS10	Pepsico2_Contig7359.mrna1	Zm00001eb428430_T001	0.82688	1.03947	0.795483	Purifying selection
AsGRAS10	Pepsico2_Contig7359.mrna1	Zm00001eb249840_T002	0.442707	1.70204	0.260104	Purifying selection
AsGRAS10	Pepsico2_Contig7359.mrna1	Zm00001eb106490_T001	0.90844	2.07944	0.436868	Purifying selection
AsGRAS10	Pepsico2_Contig7359.mrna1	Zm00001eb081760_T001	0.985552	0.959626	1.02702	Purifying selection
AsGRAS10	Pepsico2_Contig7359.mrna1	Zm00001eb405110_T001	0.803048	0.800168	1.0036	Purifying selection
AsGRAS10	Pepsico2_Contig7359.mrna1	Zm00001eb164490_T001	0.933226	1.06038	0.880084	Purifying selection
AsGRAS10	Pepsico2_Contig7359.mrna1	Zm00001eb074460_T001	0.408347	1.47384	0.277064	Purifying selection
AsGRAS10	Pepsico2_Contig7359.mrna1	Zm00001eb186770_T002	0.424429	1.28055	0.331443	Purifying selection
AsGRAS10	Pepsico2_Contig7359.mrna1	Zm00001eb327300_T001	0.938601	1.50568	0.623376	Purifying selection
AsGRAS10	Pepsico2_Contig7359.mrna1	Zm00001eb326020_T001	0.88271	0.879813	1.00329	Purifying selection
AsGRAS10	Pepsico2_Contig7359.mrna1	Zm00001eb186770_T001	0.407886	1.3506	0.302003	Purifying selection
AsGRAS10	Pepsico2_Contig7359.mrna1	Zm00001eb020850_T001	0.885897	0.945839	0.936625	Purifying selection
AsGRAS10	Pepsico2_Contig7359.mrna1	Zm00001eb186770_T003	0.397326	1.47959	0.268538	Purifying selection
AsGRAS10	Pepsico2_Contig7359.mrna1	Zm00001eb429450_T001	0.396141	1.70585	0.232225	Purifying selection
AsGRAS10	Pepsico2_Contig7359.mrna1	Zm00001eb326550_T001	0.320799	1.35029	0.237578	Purifying selection
AsGRAS10	Pepsico2_Contig7359.mrna1	Zm00001eb029390_T001	0.93045	0.971719	0.95753	Purifying selection
AsGRAS10	Pepsico2_Contig7359.mrna1	Zm00001eb344400_T001	0.865991	2.07842	0.416658	Purifying selection
AsGRAS10	Pepsico2_Contig7359.mrna1	Zm00001eb002990_T001	0.207513	0.603535	0.343829	Purifying selection
AsGRAS10	Pepsico2_Contig7359.mrna1	Zm00001eb291030_T001	0.789511	1.15798	0.681798	Purifying selection
AsGRAS10	Pepsico2_Contig7359.mrna1	Zm00001eb067940_T001	0.116622	0.495685	0.235275	Purifying selection
AsGRAS10	Pepsico2_Contig7359.mrna1	Zm00001eb023010_T001	0.141695	0.442734	0.320045	Purifying selection
AsGRAS10	Pepsico2_Contig7359.mrna1	Zm00001eb422620_T001	0.703197	0.930915	0.755382	Purifying selection
AsGRAS11	Pepsico1_Contig19030.mrna1	Zm00001eb399000_T001	0.10892	0.342599	0.317921	Purifying selection
AsGRAS11	Pepsico1_Contig19030.mrna1	Zm00001eb268460_T001	0.187353	0.52113	0.359512	Purifying selection
AsGRAS11	Pepsico1_Contig19030.mrna1	Zm00001eb301410_T001	0.203743	0.752165	0.270875	Purifying selection
AsGRAS11	Pepsico1_Contig19030.mrna1	Zm00001eb164500_T001	0.852254	1.11303	0.765703	Purifying selection
AsGRAS11	Pepsico1_Contig19030.mrna1	Zm00001eb164480_T001	0.910963	0.982605	0.92709	Purifying selection
AsGRAS11	Pepsico1_Contig19030.mrna1	Zm00001eb164480_T002	0.910963	0.982605	0.92709	Purifying selection
AsGRAS11	Pepsico1_Contig19030.mrna1	Zm00001eb011560_T001	0.867713	0.873628	0.993229	Purifying selection
AsGRAS11	Pepsico1_Contig19030.mrna1	Zm00001eb202270_T001	0.798459	2.27496	0.350978	Purifying selection
AsGRAS11	Pepsico1_Contig19030.mrna1	Zm00001eb055700_T001	0.76437	1.37237	0.55697	Purifying selection
AsGRAS11	Pepsico1_Contig19030.mrna1	Zm00001eb325750_T001	0.89662	0.997286	0.89906	Purifying selection
AsGRAS11	Pepsico1_Contig19030.mrna1	Zm00001eb325750_T003	0.89662	0.997286	0.89906	Purifying selection
AsGRAS11	Pepsico1_Contig19030.mrna1	Zm00001eb049620_T001	0.810483	0.864305	0.937728	Purifying selection
AsGRAS11	Pepsico1_Contig19030.mrna1	Zm00001eb325750_T002	0.89662	0.997286	0.89906	Purifying selection
AsGRAS11	Pepsico1_Contig19030.mrna1	Zm00001eb215870_T001	0.734963	1.19479	0.615142	Purifying selection
AsGRAS11	Pepsico1_Contig19030.mrna1	Zm00001eb196430_T001	0.835441	0.831376	1.00489	Purifying selection
AsGRAS11	Pepsico1_Contig19030.mrna1	Zm00001eb133730_T001	0.879359	1.01307	0.868011	Purifying selection
AsGRAS11	Pepsico1_Contig19030.mrna1	Zm00001eb019640_T001	0.896782	0.874521	1.02546	Purifying selection
AsGRAS11	Pepsico1_Contig19030.mrna1	Zm00001eb158520_T001	0.744967	0.896208	0.831243	Purifying selection
AsGRAS11	Pepsico1_Contig19030.mrna1	Zm00001eb266920_T001	1.10335	2.70909	0.407276	Purifying selection
AsGRAS11	Pepsico1_Contig19030.mrna1	Zm00001eb195650_T001	0.775896	0.975203	0.795625	Purifying selection
AsGRAS11	Pepsico1_Contig19030.mrna1	Zm00001eb136350_T001	0.90077	1.06414	0.846474	Purifying selection
AsGRAS11	Pepsico1_Contig19030.mrna1	Zm00001eb136150_T001	0.83269	0.963074	0.864617	Purifying selection
AsGRAS11	Pepsico1_Contig19030.mrna1	Zm00001eb165340_T001	0.971487	1.95815	0.496126	Purifying selection
AsGRAS11	Pepsico1_Contig19030.mrna1	Zm00001eb108090_T001	0.847299	0.965905	0.877207	Purifying selection
AsGRAS11	Pepsico1_Contig19030.mrna1	Zm00001eb379340_T001	0.434975	0.820928	0.529858	Purifying selection
AsGRAS11	Pepsico1_Contig19030.mrna1	Zm00001eb165340_T002	0.963552	1.86076	0.517828	Purifying selection
AsGRAS11	Pepsico1_Contig19030.mrna1	Zm00001eb378590_T001	0.808931	0.752463	1.07504	Purifying selection
AsGRAS11	Pepsico1_Contig19030.mrna1	Zm00001eb054480_T001	0.800799	0.831977	0.962525	Purifying selection
AsGRAS11	Pepsico1_Contig19030.mrna1	Zm00001eb378590_T002	0.808931	0.752463	1.07504	Purifying selection
AsGRAS11	Pepsico1_Contig19030.mrna1	Zm00001eb054480_T002	0.771558	0.810317	0.952169	Purifying selection
AsGRAS11	Pepsico1_Contig19030.mrna1	Zm00001eb405080_T001	0.841846	1.00575	0.837034	Purifying selection
AsGRAS11	Pepsico1_Contig19030.mrna1	Zm00001eb285410_T001	0.811405	1.10732	0.732763	Purifying selection
AsGRAS11	Pepsico1_Contig19030.mrna1	Zm00001eb291930_T001	0.926825	0.896706	1.03359	Purifying selection
AsGRAS11	Pepsico1_Contig19030.mrna1	Zm00001eb000470_T001	0.221664	0.661821	0.33493	Purifying selection
AsGRAS11	Pepsico1_Contig19030.mrna1	Zm00001eb108250_T001	0.847052	0.834112	1.01551	Purifying selection
AsGRAS11	Pepsico1_Contig19030.mrna1	Zm00001eb108250_T002	0.847052	0.834112	1.01551	Purifying selection
AsGRAS11	Pepsico1_Contig19030.mrna1	Zm00001eb170110_T001	0.828058	0.876591	0.944634	Purifying selection
AsGRAS11	Pepsico1_Contig19030.mrna1	Zm00001eb164530_T001	0.920218	1.58483	0.580641	Purifying selection
AsGRAS11	Pepsico1_Contig19030.mrna1	Zm00001eb164530_T002	0.911683	2.26861	0.401869	Purifying selection
AsGRAS11	Pepsico1_Contig19030.mrna1	Zm00001eb139470_T001	0.770134	1.12936	0.68192	Purifying selection
AsGRAS11	Pepsico1_Contig19030.mrna1	Zm00001eb392980_T001	0.766485	0.85428	0.897229	Purifying selection
AsGRAS11	Pepsico1_Contig19030.mrna1	Zm00001eb062760_T001	0.997243	2.06079	0.483914	Purifying selection
AsGRAS11	Pepsico1_Contig19030.mrna1	Zm00001eb301400_T001	0.108887	0.357566	0.304522	Purifying selection
AsGRAS11	Pepsico1_Contig19030.mrna1	Zm00001eb148290_T002	0.868712	1.64859	0.526943	Purifying selection
AsGRAS11	Pepsico1_Contig19030.mrna1	Zm00001eb148290_T001	0.868712	1.64859	0.526943	Purifying selection
AsGRAS11	Pepsico1_Contig19030.mrna1	Zm00001eb164350_T001	0.924348	1.1034	0.837725	Purifying selection
AsGRAS11	Pepsico1_Contig19030.mrna1	Zm00001eb236120_T001	0.689292	0.87481	0.787933	Purifying selection
AsGRAS11	Pepsico1_Contig19030.mrna1	Zm00001eb405090_T001	0.896946	1.15252	0.778249	Purifying selection
AsGRAS11	Pepsico1_Contig19030.mrna1	Zm00001eb164470_T001	0.92245	1.44709	0.637451	Purifying selection
AsGRAS11	Pepsico1_Contig19030.mrna1	Zm00001eb187310_T001	0.814676	0.999031	0.815466	Purifying selection
AsGRAS11	Pepsico1_Contig19030.mrna1	Zm00001eb388460_T001	0.82311	0.932126	0.883046	Purifying selection
AsGRAS11	Pepsico1_Contig19030.mrna1	Zm00001eb196420_T001	0.82673	0.753451	1.09726	Purifying selection
AsGRAS11	Pepsico1_Contig19030.mrna1	Zm00001eb136140_T001	0.906631	2.26857	0.399649	Purifying selection
AsGRAS11	Pepsico1_Contig19030.mrna1	Zm00001eb112130_T001	1.01155	1.62279	0.623341	Purifying selection
AsGRAS11	Pepsico1_Contig19030.mrna1	Zm00001eb093670_T002	0.788135	0.810586	0.972302	Purifying selection
AsGRAS11	Pepsico1_Contig19030.mrna1	Zm00001eb093670_T001	0.793534	0.806244	0.984236	Purifying selection
AsGRAS11	Pepsico1_Contig19030.mrna1	Zm00001eb067930_T001	0.348876	0.733509	0.475626	Purifying selection
AsGRAS11	Pepsico1_Contig19030.mrna1	Zm00001eb363140_T001	0.817288	1.03084	0.792835	Purifying selection
AsGRAS11	Pepsico1_Contig19030.mrna1	Zm00001eb266930_T002	0.963597	2.73191	0.352719	Purifying selection
AsGRAS11	Pepsico1_Contig19030.mrna1	Zm00001eb324600_T001	0.710091	0.894395	0.793935	Purifying selection
AsGRAS11	Pepsico1_Contig19030.mrna1	Zm00001eb073130_T001	0.804271	1.01092	0.795582	Purifying selection
AsGRAS11	Pepsico1_Contig19030.mrna1	Zm00001eb115950_T001	0.861142	1.18705	0.725445	Purifying selection
AsGRAS11	Pepsico1_Contig19030.mrna1	Zm00001eb398990_T001	0.19369	0.753908	0.256915	Purifying selection
AsGRAS11	Pepsico1_Contig19030.mrna1	Zm00001eb082700_T001	0.768834	0.855007	0.899214	Purifying selection
AsGRAS11	Pepsico1_Contig19030.mrna1	Zm00001eb107910_T002	0.879424	1.10051	0.799107	Purifying selection
AsGRAS11	Pepsico1_Contig19030.mrna1	Zm00001eb107910_T001	0.879424	1.10051	0.799107	Purifying selection
AsGRAS11	Pepsico1_Contig19030.mrna1	Zm00001eb141310_T001	0.796111	0.941659	0.845435	Purifying selection
AsGRAS11	Pepsico1_Contig19030.mrna1	Zm00001eb326210_T001	0.885917	0.880076	1.00664	Purifying selection
AsGRAS11	Pepsico1_Contig19030.mrna1	Zm00001eb216610_T001	0.760199	0.878668	0.865172	Purifying selection
AsGRAS11	Pepsico1_Contig19030.mrna1	Zm00001eb249840_T001	0.473149	1.5525	0.304766	Purifying selection
AsGRAS11	Pepsico1_Contig19030.mrna1	Zm00001eb428430_T001	0.82688	1.03947	0.795483	Purifying selection
AsGRAS11	Pepsico1_Contig19030.mrna1	Zm00001eb249840_T002	0.442707	1.70204	0.260104	Purifying selection
AsGRAS11	Pepsico1_Contig19030.mrna1	Zm00001eb106490_T001	0.90844	2.07944	0.436868	Purifying selection
AsGRAS11	Pepsico1_Contig19030.mrna1	Zm00001eb081760_T001	0.985552	0.959626	1.02702	Purifying selection
AsGRAS11	Pepsico1_Contig19030.mrna1	Zm00001eb405110_T001	0.803048	0.800168	1.0036	Purifying selection
AsGRAS11	Pepsico1_Contig19030.mrna1	Zm00001eb164490_T001	0.933226	1.06038	0.880084	Purifying selection
AsGRAS11	Pepsico1_Contig19030.mrna1	Zm00001eb074460_T001	0.408347	1.47384	0.277064	Purifying selection
AsGRAS11	Pepsico1_Contig19030.mrna1	Zm00001eb186770_T002	0.424429	1.28055	0.331443	Purifying selection
AsGRAS11	Pepsico1_Contig19030.mrna1	Zm00001eb327300_T001	0.938601	1.50568	0.623376	Purifying selection
AsGRAS11	Pepsico1_Contig19030.mrna1	Zm00001eb326020_T001	0.88271	0.879813	1.00329	Purifying selection
AsGRAS11	Pepsico1_Contig19030.mrna1	Zm00001eb186770_T001	0.407886	1.3506	0.302003	Purifying selection
AsGRAS11	Pepsico1_Contig19030.mrna1	Zm00001eb020850_T001	0.885897	0.945839	0.936625	Purifying selection
AsGRAS11	Pepsico1_Contig19030.mrna1	Zm00001eb186770_T003	0.397326	1.47959	0.268538	Purifying selection
AsGRAS11	Pepsico1_Contig19030.mrna1	Zm00001eb429450_T001	0.396141	1.70585	0.232225	Purifying selection
AsGRAS11	Pepsico1_Contig19030.mrna1	Zm00001eb326550_T001	0.320799	1.35029	0.237578	Purifying selection
AsGRAS11	Pepsico1_Contig19030.mrna1	Zm00001eb029390_T001	0.93045	0.971719	0.95753	Purifying selection
AsGRAS11	Pepsico1_Contig19030.mrna1	Zm00001eb344400_T001	0.865991	2.07842	0.416658	Purifying selection
AsGRAS11	Pepsico1_Contig19030.mrna1	Zm00001eb002990_T001	0.207513	0.603535	0.343829	Purifying selection
AsGRAS11	Pepsico1_Contig19030.mrna1	Zm00001eb291030_T001	0.789511	1.15798	0.681798	Purifying selection
AsGRAS11	Pepsico1_Contig19030.mrna1	Zm00001eb067940_T001	0.116622	0.495685	0.235275	Purifying selection
AsGRAS11	Pepsico1_Contig19030.mrna1	Zm00001eb023010_T001	0.141695	0.442734	0.320045	Purifying selection
AsGRAS11	Pepsico1_Contig19030.mrna1	Zm00001eb422620_T001	0.703197	0.930915	0.755382	Purifying selection
AsGRAS12	Pepsico1_Contig14278.mrna1	Zm00001eb399000_T001	0.10892	0.342599	0.317921	Purifying selection
AsGRAS12	Pepsico1_Contig14278.mrna1	Zm00001eb268460_T001	0.187353	0.52113	0.359512	Purifying selection
AsGRAS12	Pepsico1_Contig14278.mrna1	Zm00001eb301410_T001	0.203743	0.752165	0.270875	Purifying selection
AsGRAS12	Pepsico1_Contig14278.mrna1	Zm00001eb164500_T001	0.852254	1.11303	0.765703	Purifying selection
AsGRAS12	Pepsico1_Contig14278.mrna1	Zm00001eb164480_T001	0.910963	0.982605	0.92709	Purifying selection
AsGRAS12	Pepsico1_Contig14278.mrna1	Zm00001eb164480_T002	0.910963	0.982605	0.92709	Purifying selection
AsGRAS12	Pepsico1_Contig14278.mrna1	Zm00001eb011560_T001	0.867713	0.873628	0.993229	Purifying selection
AsGRAS12	Pepsico1_Contig14278.mrna1	Zm00001eb202270_T001	0.798459	2.27496	0.350978	Purifying selection
AsGRAS12	Pepsico1_Contig14278.mrna1	Zm00001eb055700_T001	0.76437	1.37237	0.55697	Purifying selection
AsGRAS12	Pepsico1_Contig14278.mrna1	Zm00001eb325750_T001	0.89662	0.997286	0.89906	Purifying selection
AsGRAS12	Pepsico1_Contig14278.mrna1	Zm00001eb325750_T003	0.89662	0.997286	0.89906	Purifying selection
AsGRAS12	Pepsico1_Contig14278.mrna1	Zm00001eb049620_T001	0.810483	0.864305	0.937728	Purifying selection
AsGRAS12	Pepsico1_Contig14278.mrna1	Zm00001eb325750_T002	0.89662	0.997286	0.89906	Purifying selection
AsGRAS12	Pepsico1_Contig14278.mrna1	Zm00001eb215870_T001	0.734963	1.19479	0.615142	Purifying selection
AsGRAS12	Pepsico1_Contig14278.mrna1	Zm00001eb196430_T001	0.835441	0.831376	1.00489	Purifying selection
AsGRAS12	Pepsico1_Contig14278.mrna1	Zm00001eb133730_T001	0.879359	1.01307	0.868011	Purifying selection
AsGRAS12	Pepsico1_Contig14278.mrna1	Zm00001eb019640_T001	0.896782	0.874521	1.02546	Purifying selection
AsGRAS12	Pepsico1_Contig14278.mrna1	Zm00001eb158520_T001	0.744967	0.896208	0.831243	Purifying selection
AsGRAS12	Pepsico1_Contig14278.mrna1	Zm00001eb266920_T001	1.10335	2.70909	0.407276	Purifying selection
AsGRAS12	Pepsico1_Contig14278.mrna1	Zm00001eb195650_T001	0.775896	0.975203	0.795625	Purifying selection
AsGRAS12	Pepsico1_Contig14278.mrna1	Zm00001eb136350_T001	0.90077	1.06414	0.846474	Purifying selection
AsGRAS12	Pepsico1_Contig14278.mrna1	Zm00001eb136150_T001	0.83269	0.963074	0.864617	Purifying selection
AsGRAS12	Pepsico1_Contig14278.mrna1	Zm00001eb165340_T001	0.971487	1.95815	0.496126	Purifying selection
AsGRAS12	Pepsico1_Contig14278.mrna1	Zm00001eb108090_T001	0.847299	0.965905	0.877207	Purifying selection
AsGRAS12	Pepsico1_Contig14278.mrna1	Zm00001eb379340_T001	0.434975	0.820928	0.529858	Purifying selection
AsGRAS12	Pepsico1_Contig14278.mrna1	Zm00001eb165340_T002	0.963552	1.86076	0.517828	Purifying selection
AsGRAS12	Pepsico1_Contig14278.mrna1	Zm00001eb378590_T001	0.808931	0.752463	1.07504	Purifying selection
AsGRAS12	Pepsico1_Contig14278.mrna1	Zm00001eb054480_T001	0.800799	0.831977	0.962525	Purifying selection
AsGRAS12	Pepsico1_Contig14278.mrna1	Zm00001eb378590_T002	0.808931	0.752463	1.07504	Purifying selection
AsGRAS12	Pepsico1_Contig14278.mrna1	Zm00001eb054480_T002	0.771558	0.810317	0.952169	Purifying selection
AsGRAS12	Pepsico1_Contig14278.mrna1	Zm00001eb405080_T001	0.841846	1.00575	0.837034	Purifying selection
AsGRAS12	Pepsico1_Contig14278.mrna1	Zm00001eb285410_T001	0.811405	1.10732	0.732763	Purifying selection
AsGRAS12	Pepsico1_Contig14278.mrna1	Zm00001eb291930_T001	0.926825	0.896706	1.03359	Purifying selection
AsGRAS12	Pepsico1_Contig14278.mrna1	Zm00001eb000470_T001	0.221664	0.661821	0.33493	Purifying selection
AsGRAS12	Pepsico1_Contig14278.mrna1	Zm00001eb108250_T001	0.847052	0.834112	1.01551	Purifying selection
AsGRAS12	Pepsico1_Contig14278.mrna1	Zm00001eb108250_T002	0.847052	0.834112	1.01551	Purifying selection
AsGRAS12	Pepsico1_Contig14278.mrna1	Zm00001eb170110_T001	0.828058	0.876591	0.944634	Purifying selection
AsGRAS12	Pepsico1_Contig14278.mrna1	Zm00001eb164530_T001	0.920218	1.58483	0.580641	Purifying selection
AsGRAS12	Pepsico1_Contig14278.mrna1	Zm00001eb164530_T002	0.911683	2.26861	0.401869	Purifying selection
AsGRAS12	Pepsico1_Contig14278.mrna1	Zm00001eb139470_T001	0.770134	1.12936	0.68192	Purifying selection
AsGRAS12	Pepsico1_Contig14278.mrna1	Zm00001eb392980_T001	0.766485	0.85428	0.897229	Purifying selection
AsGRAS12	Pepsico1_Contig14278.mrna1	Zm00001eb062760_T001	0.997243	2.06079	0.483914	Purifying selection
AsGRAS12	Pepsico1_Contig14278.mrna1	Zm00001eb301400_T001	0.108887	0.357566	0.304522	Purifying selection
AsGRAS12	Pepsico1_Contig14278.mrna1	Zm00001eb148290_T002	0.868712	1.64859	0.526943	Purifying selection
AsGRAS12	Pepsico1_Contig14278.mrna1	Zm00001eb148290_T001	0.868712	1.64859	0.526943	Purifying selection
AsGRAS12	Pepsico1_Contig14278.mrna1	Zm00001eb164350_T001	0.924348	1.1034	0.837725	Purifying selection
AsGRAS12	Pepsico1_Contig14278.mrna1	Zm00001eb236120_T001	0.689292	0.87481	0.787933	Purifying selection
AsGRAS12	Pepsico1_Contig14278.mrna1	Zm00001eb405090_T001	0.896946	1.15252	0.778249	Purifying selection
AsGRAS12	Pepsico1_Contig14278.mrna1	Zm00001eb164470_T001	0.92245	1.44709	0.637451	Purifying selection
AsGRAS12	Pepsico1_Contig14278.mrna1	Zm00001eb187310_T001	0.814676	0.999031	0.815466	Purifying selection
AsGRAS12	Pepsico1_Contig14278.mrna1	Zm00001eb388460_T001	0.82311	0.932126	0.883046	Purifying selection
AsGRAS12	Pepsico1_Contig14278.mrna1	Zm00001eb196420_T001	0.82673	0.753451	1.09726	Purifying selection
AsGRAS12	Pepsico1_Contig14278.mrna1	Zm00001eb136140_T001	0.906631	2.26857	0.399649	Purifying selection
AsGRAS12	Pepsico1_Contig14278.mrna1	Zm00001eb112130_T001	1.01155	1.62279	0.623341	Purifying selection
AsGRAS12	Pepsico1_Contig14278.mrna1	Zm00001eb093670_T002	0.788135	0.810586	0.972302	Purifying selection
AsGRAS12	Pepsico1_Contig14278.mrna1	Zm00001eb093670_T001	0.793534	0.806244	0.984236	Purifying selection
AsGRAS12	Pepsico1_Contig14278.mrna1	Zm00001eb067930_T001	0.348876	0.733509	0.475626	Purifying selection
AsGRAS12	Pepsico1_Contig14278.mrna1	Zm00001eb363140_T001	0.817288	1.03084	0.792835	Purifying selection
AsGRAS12	Pepsico1_Contig14278.mrna1	Zm00001eb266930_T002	0.963597	2.73191	0.352719	Purifying selection
AsGRAS12	Pepsico1_Contig14278.mrna1	Zm00001eb324600_T001	0.710091	0.894395	0.793935	Purifying selection
AsGRAS12	Pepsico1_Contig14278.mrna1	Zm00001eb073130_T001	0.804271	1.01092	0.795582	Purifying selection
AsGRAS12	Pepsico1_Contig14278.mrna1	Zm00001eb115950_T001	0.861142	1.18705	0.725445	Purifying selection
AsGRAS12	Pepsico1_Contig14278.mrna1	Zm00001eb398990_T001	0.19369	0.753908	0.256915	Purifying selection
AsGRAS12	Pepsico1_Contig14278.mrna1	Zm00001eb082700_T001	0.768834	0.855007	0.899214	Purifying selection
AsGRAS12	Pepsico1_Contig14278.mrna1	Zm00001eb107910_T002	0.879424	1.10051	0.799107	Purifying selection
AsGRAS12	Pepsico1_Contig14278.mrna1	Zm00001eb107910_T001	0.879424	1.10051	0.799107	Purifying selection
AsGRAS12	Pepsico1_Contig14278.mrna1	Zm00001eb141310_T001	0.796111	0.941659	0.845435	Purifying selection
AsGRAS12	Pepsico1_Contig14278.mrna1	Zm00001eb326210_T001	0.885917	0.880076	1.00664	Purifying selection
AsGRAS12	Pepsico1_Contig14278.mrna1	Zm00001eb216610_T001	0.760199	0.878668	0.865172	Purifying selection
AsGRAS12	Pepsico1_Contig14278.mrna1	Zm00001eb249840_T001	0.473149	1.5525	0.304766	Purifying selection
AsGRAS12	Pepsico1_Contig14278.mrna1	Zm00001eb428430_T001	0.82688	1.03947	0.795483	Purifying selection
AsGRAS12	Pepsico1_Contig14278.mrna1	Zm00001eb249840_T002	0.442707	1.70204	0.260104	Purifying selection
AsGRAS12	Pepsico1_Contig14278.mrna1	Zm00001eb106490_T001	0.90844	2.07944	0.436868	Purifying selection
AsGRAS12	Pepsico1_Contig14278.mrna1	Zm00001eb081760_T001	0.985552	0.959626	1.02702	Purifying selection
AsGRAS12	Pepsico1_Contig14278.mrna1	Zm00001eb405110_T001	0.803048	0.800168	1.0036	Purifying selection
AsGRAS12	Pepsico1_Contig14278.mrna1	Zm00001eb164490_T001	0.933226	1.06038	0.880084	Purifying selection
AsGRAS12	Pepsico1_Contig14278.mrna1	Zm00001eb074460_T001	0.408347	1.47384	0.277064	Purifying selection
AsGRAS12	Pepsico1_Contig14278.mrna1	Zm00001eb186770_T002	0.424429	1.28055	0.331443	Purifying selection
AsGRAS12	Pepsico1_Contig14278.mrna1	Zm00001eb327300_T001	0.938601	1.50568	0.623376	Purifying selection
AsGRAS12	Pepsico1_Contig14278.mrna1	Zm00001eb326020_T001	0.88271	0.879813	1.00329	Purifying selection
AsGRAS12	Pepsico1_Contig14278.mrna1	Zm00001eb186770_T001	0.407886	1.3506	0.302003	Purifying selection
AsGRAS12	Pepsico1_Contig14278.mrna1	Zm00001eb020850_T001	0.885897	0.945839	0.936625	Purifying selection
AsGRAS12	Pepsico1_Contig14278.mrna1	Zm00001eb186770_T003	0.397326	1.47959	0.268538	Purifying selection
AsGRAS12	Pepsico1_Contig14278.mrna1	Zm00001eb429450_T001	0.396141	1.70585	0.232225	Purifying selection
AsGRAS12	Pepsico1_Contig14278.mrna1	Zm00001eb326550_T001	0.320799	1.35029	0.237578	Purifying selection
AsGRAS12	Pepsico1_Contig14278.mrna1	Zm00001eb029390_T001	0.93045	0.971719	0.95753	Purifying selection
AsGRAS12	Pepsico1_Contig14278.mrna1	Zm00001eb344400_T001	0.865991	2.07842	0.416658	Purifying selection
AsGRAS12	Pepsico1_Contig14278.mrna1	Zm00001eb002990_T001	0.207513	0.603535	0.343829	Purifying selection
AsGRAS12	Pepsico1_Contig14278.mrna1	Zm00001eb291030_T001	0.789511	1.15798	0.681798	Purifying selection
AsGRAS12	Pepsico1_Contig14278.mrna1	Zm00001eb067940_T001	0.116622	0.495685	0.235275	Purifying selection
AsGRAS12	Pepsico1_Contig14278.mrna1	Zm00001eb023010_T001	0.141695	0.442734	0.320045	Purifying selection
AsGRAS12	Pepsico1_Contig14278.mrna1	Zm00001eb422620_T001	0.703197	0.930915	0.755382	Purifying selection
AsGRAS13	Pepsico1_Contig14835.mrna1	Zm00001eb399000_T001	0.120661	0.372861	0.323609	Purifying selection
AsGRAS13	Pepsico1_Contig14835.mrna1	Zm00001eb268460_T001	0.191517	0.502055	0.381466	Purifying selection
AsGRAS13	Pepsico1_Contig14835.mrna1	Zm00001eb301410_T001	0.214881	0.718456	0.299088	Purifying selection
AsGRAS13	Pepsico1_Contig14835.mrna1	Zm00001eb164500_T001	0.857557	1.15745	0.740904	Purifying selection
AsGRAS13	Pepsico1_Contig14835.mrna1	Zm00001eb164480_T001	0.830394	0.985715	0.842428	Purifying selection
AsGRAS13	Pepsico1_Contig14835.mrna1	Zm00001eb164480_T002	0.830394	0.985715	0.842428	Purifying selection
AsGRAS13	Pepsico1_Contig14835.mrna1	Zm00001eb011560_T001	0.884113	0.881465	1.003	Purifying selection
AsGRAS13	Pepsico1_Contig14835.mrna1	Zm00001eb202270_T001	0.844037	1.62973	0.517901	Purifying selection
AsGRAS13	Pepsico1_Contig14835.mrna1	Zm00001eb055700_T001	0.697497	1.26183	0.552766	Purifying selection
AsGRAS13	Pepsico1_Contig14835.mrna1	Zm00001eb325750_T001	0.794186	0.862568	0.920723	Purifying selection
AsGRAS13	Pepsico1_Contig14835.mrna1	Zm00001eb325750_T003	0.794186	0.862568	0.920723	Purifying selection
AsGRAS13	Pepsico1_Contig14835.mrna1	Zm00001eb049620_T001	0.822259	0.890329	0.923545	Purifying selection
AsGRAS13	Pepsico1_Contig14835.mrna1	Zm00001eb325750_T002	0.794186	0.862568	0.920723	Purifying selection
AsGRAS13	Pepsico1_Contig14835.mrna1	Zm00001eb215870_T001	0.699064	1.19444	0.585265	Purifying selection
AsGRAS13	Pepsico1_Contig14835.mrna1	Zm00001eb196430_T001	0.792512	0.808836	0.979819	Purifying selection
AsGRAS13	Pepsico1_Contig14835.mrna1	Zm00001eb019640_T001	0.834788	0.864006	0.966184	Purifying selection
AsGRAS13	Pepsico1_Contig14835.mrna1	Zm00001eb158520_T001	0.744552	0.847157	0.878883	Purifying selection
AsGRAS13	Pepsico1_Contig14835.mrna1	Zm00001eb195650_T001	0.809765	0.886985	0.912941	Purifying selection
AsGRAS13	Pepsico1_Contig14835.mrna1	Zm00001eb136350_T001	0.875337	1.00324	0.87251	Purifying selection
AsGRAS13	Pepsico1_Contig14835.mrna1	Zm00001eb136150_T001	0.880391	0.901289	0.976813	Purifying selection
AsGRAS13	Pepsico1_Contig14835.mrna1	Zm00001eb165340_T001	0.945935	1.93665	0.488439	Purifying selection
AsGRAS13	Pepsico1_Contig14835.mrna1	Zm00001eb108090_T001	0.845124	0.962072	0.878442	Purifying selection
AsGRAS13	Pepsico1_Contig14835.mrna1	Zm00001eb379340_T001	0.465209	0.881994	0.527452	Purifying selection
AsGRAS13	Pepsico1_Contig14835.mrna1	Zm00001eb165340_T002	0.961463	1.9584	0.490943	Purifying selection
AsGRAS13	Pepsico1_Contig14835.mrna1	Zm00001eb378590_T001	0.806367	0.762065	1.05813	Purifying selection
AsGRAS13	Pepsico1_Contig14835.mrna1	Zm00001eb054480_T001	0.831641	0.813202	1.02267	Purifying selection
AsGRAS13	Pepsico1_Contig14835.mrna1	Zm00001eb378590_T002	0.806367	0.762065	1.05813	Purifying selection
AsGRAS13	Pepsico1_Contig14835.mrna1	Zm00001eb054480_T002	0.796273	0.792242	1.00509	Purifying selection
AsGRAS13	Pepsico1_Contig14835.mrna1	Zm00001eb405080_T001	0.837639	0.994895	0.841937	Purifying selection
AsGRAS13	Pepsico1_Contig14835.mrna1	Zm00001eb285410_T001	0.87494	1.16463	0.751263	Purifying selection
AsGRAS13	Pepsico1_Contig14835.mrna1	Zm00001eb291930_T001	0.928897	0.894411	1.03856	Purifying selection
AsGRAS13	Pepsico1_Contig14835.mrna1	Zm00001eb000470_T001	0.226405	0.643375	0.351902	Purifying selection
AsGRAS13	Pepsico1_Contig14835.mrna1	Zm00001eb108250_T001	0.843608	0.843955	0.999589	Purifying selection
AsGRAS13	Pepsico1_Contig14835.mrna1	Zm00001eb108250_T002	0.843608	0.843955	0.999589	Purifying selection
AsGRAS13	Pepsico1_Contig14835.mrna1	Zm00001eb170110_T001	0.795591	0.864971	0.919789	Purifying selection
AsGRAS13	Pepsico1_Contig14835.mrna1	Zm00001eb164530_T001	0.921177	1.54295	0.597025	Purifying selection
AsGRAS13	Pepsico1_Contig14835.mrna1	Zm00001eb164530_T002	0.938435	2.02163	0.464198	Purifying selection
AsGRAS13	Pepsico1_Contig14835.mrna1	Zm00001eb139470_T001	0.812795	1.18139	0.688	Purifying selection
AsGRAS13	Pepsico1_Contig14835.mrna1	Zm00001eb392980_T001	0.801826	0.83427	0.961111	Purifying selection
AsGRAS13	Pepsico1_Contig14835.mrna1	Zm00001eb062760_T001	0.961411	2.64254	0.363821	Purifying selection
AsGRAS13	Pepsico1_Contig14835.mrna1	Zm00001eb301400_T001	0.120624	0.388498	0.310488	Purifying selection
AsGRAS13	Pepsico1_Contig14835.mrna1	Zm00001eb148290_T002	0.871729	1.55338	0.561181	Purifying selection
AsGRAS13	Pepsico1_Contig14835.mrna1	Zm00001eb148290_T001	0.871729	1.55338	0.561181	Purifying selection
AsGRAS13	Pepsico1_Contig14835.mrna1	Zm00001eb164350_T001	0.958196	1.07896	0.888072	Purifying selection
AsGRAS13	Pepsico1_Contig14835.mrna1	Zm00001eb236120_T001	0.693358	0.838887	0.826521	Purifying selection
AsGRAS13	Pepsico1_Contig14835.mrna1	Zm00001eb405090_T001	0.936256	0.955593	0.979764	Purifying selection
AsGRAS13	Pepsico1_Contig14835.mrna1	Zm00001eb164470_T001	1.02842	1.52729	0.67336	Purifying selection
AsGRAS13	Pepsico1_Contig14835.mrna1	Zm00001eb187310_T001	0.769465	0.942112	0.816745	Purifying selection
AsGRAS13	Pepsico1_Contig14835.mrna1	Zm00001eb388460_T001	0.709027	0.979879	0.723587	Purifying selection
AsGRAS13	Pepsico1_Contig14835.mrna1	Zm00001eb196420_T001	0.820342	0.79673	1.02964	Purifying selection
AsGRAS13	Pepsico1_Contig14835.mrna1	Zm00001eb136140_T001	1.09255	1.84912	0.590852	Purifying selection
AsGRAS13	Pepsico1_Contig14835.mrna1	Zm00001eb112130_T001	0.87304	1.90606	0.458035	Purifying selection
AsGRAS13	Pepsico1_Contig14835.mrna1	Zm00001eb093670_T002	0.811599	0.88316	0.918972	Purifying selection
AsGRAS13	Pepsico1_Contig14835.mrna1	Zm00001eb093670_T001	0.811164	0.846714	0.958014	Purifying selection
AsGRAS13	Pepsico1_Contig14835.mrna1	Zm00001eb067930_T001	0.33222	0.695883	0.477407	Purifying selection
AsGRAS13	Pepsico1_Contig14835.mrna1	Zm00001eb363140_T001	0.800649	1.0387	0.770816	Purifying selection
AsGRAS13	Pepsico1_Contig14835.mrna1	Zm00001eb324600_T001	0.728803	0.90819	0.802479	Purifying selection
AsGRAS13	Pepsico1_Contig14835.mrna1	Zm00001eb073130_T001	0.775064	1.03288	0.750391	Purifying selection
AsGRAS13	Pepsico1_Contig14835.mrna1	Zm00001eb115950_T001	0.874024	1.10535	0.790722	Purifying selection
AsGRAS13	Pepsico1_Contig14835.mrna1	Zm00001eb398990_T001	0.20395	0.721528	0.282665	Purifying selection
AsGRAS13	Pepsico1_Contig14835.mrna1	Zm00001eb082700_T001	0.754363	0.915762	0.823755	Purifying selection
AsGRAS13	Pepsico1_Contig14835.mrna1	Zm00001eb107910_T002	0.916537	1.1092	0.826302	Purifying selection
AsGRAS13	Pepsico1_Contig14835.mrna1	Zm00001eb107910_T001	0.916537	1.1092	0.826302	Purifying selection
AsGRAS13	Pepsico1_Contig14835.mrna1	Zm00001eb141310_T001	0.784436	0.875489	0.895998	Purifying selection
AsGRAS13	Pepsico1_Contig14835.mrna1	Zm00001eb326210_T001	0.885757	0.819466	1.0809	Purifying selection
AsGRAS13	Pepsico1_Contig14835.mrna1	Zm00001eb216610_T001	0.791022	0.760153	1.04061	Purifying selection
AsGRAS13	Pepsico1_Contig14835.mrna1	Zm00001eb249840_T001	0.477576	1.40442	0.340053	Purifying selection
AsGRAS13	Pepsico1_Contig14835.mrna1	Zm00001eb428430_T001	0.86901	1.06137	0.818764	Purifying selection
AsGRAS13	Pepsico1_Contig14835.mrna1	Zm00001eb249840_T002	0.44497	1.5209	0.29257	Purifying selection
AsGRAS13	Pepsico1_Contig14835.mrna1	Zm00001eb106490_T001	0.883665	2.86293	0.308658	Purifying selection
AsGRAS13	Pepsico1_Contig14835.mrna1	Zm00001eb081760_T001	0.929389	0.991447	0.937406	Purifying selection
AsGRAS13	Pepsico1_Contig14835.mrna1	Zm00001eb405110_T001	0.75418	0.83965	0.898207	Purifying selection
AsGRAS13	Pepsico1_Contig14835.mrna1	Zm00001eb164490_T001	0.913925	1.11044	0.823031	Purifying selection
AsGRAS13	Pepsico1_Contig14835.mrna1	Zm00001eb074460_T001	0.383355	1.40642	0.272576	Purifying selection
AsGRAS13	Pepsico1_Contig14835.mrna1	Zm00001eb186770_T002	0.42294	1.26902	0.333282	Purifying selection
AsGRAS13	Pepsico1_Contig14835.mrna1	Zm00001eb327300_T001	0.989405	1.72145	0.574752	Purifying selection
AsGRAS13	Pepsico1_Contig14835.mrna1	Zm00001eb326020_T001	0.881186	0.862115	1.02212	Purifying selection
AsGRAS13	Pepsico1_Contig14835.mrna1	Zm00001eb186770_T001	0.406923	1.28386	0.316954	Purifying selection
AsGRAS13	Pepsico1_Contig14835.mrna1	Zm00001eb020850_T001	0.947062	0.866563	1.09289	Purifying selection
AsGRAS13	Pepsico1_Contig14835.mrna1	Zm00001eb186770_T003	0.396408	1.42191	0.278785	Purifying selection
AsGRAS13	Pepsico1_Contig14835.mrna1	Zm00001eb429450_T001	0.381833	1.62469	0.23502	Purifying selection
AsGRAS13	Pepsico1_Contig14835.mrna1	Zm00001eb326550_T001	0.328192	1.36582	0.240289	Purifying selection
AsGRAS13	Pepsico1_Contig14835.mrna1	Zm00001eb029390_T001	0.849324	0.881706	0.963274	Purifying selection
AsGRAS13	Pepsico1_Contig14835.mrna1	Zm00001eb344400_T001	0.856636	2.09661	0.408582	Purifying selection
AsGRAS13	Pepsico1_Contig14835.mrna1	Zm00001eb002990_T001	0.27862	0.652465	0.427026	Purifying selection
AsGRAS13	Pepsico1_Contig14835.mrna1	Zm00001eb291030_T001	0.789904	1.15654	0.682987	Purifying selection
AsGRAS13	Pepsico1_Contig14835.mrna1	Zm00001eb288400_T002	0.903336	2.69893	0.334701	Purifying selection
AsGRAS13	Pepsico1_Contig14835.mrna1	Zm00001eb067940_T001	0.127345	0.516588	0.246511	Purifying selection
AsGRAS13	Pepsico1_Contig14835.mrna1	Zm00001eb288400_T001	0.903336	2.69893	0.334701	Purifying selection
AsGRAS13	Pepsico1_Contig14835.mrna1	Zm00001eb023010_T001	0.144868	0.479545	0.302096	Purifying selection
AsGRAS13	Pepsico1_Contig14835.mrna1	Zm00001eb422620_T001	0.697233	0.895171	0.778882	Purifying selection
AsGRAS14	Pepsico1_Contig27727.mrna1	Zm00001eb399000_T001	0.120661	0.372861	0.323609	Purifying selection
AsGRAS14	Pepsico1_Contig27727.mrna1	Zm00001eb268460_T001	0.191517	0.502055	0.381466	Purifying selection
AsGRAS14	Pepsico1_Contig27727.mrna1	Zm00001eb301410_T001	0.214881	0.718456	0.299088	Purifying selection
AsGRAS14	Pepsico1_Contig27727.mrna1	Zm00001eb164500_T001	0.857557	1.15745	0.740904	Purifying selection
AsGRAS14	Pepsico1_Contig27727.mrna1	Zm00001eb164480_T001	0.830394	0.985715	0.842428	Purifying selection
AsGRAS14	Pepsico1_Contig27727.mrna1	Zm00001eb164480_T002	0.830394	0.985715	0.842428	Purifying selection
AsGRAS14	Pepsico1_Contig27727.mrna1	Zm00001eb011560_T001	0.884113	0.881465	1.003	Purifying selection
AsGRAS14	Pepsico1_Contig27727.mrna1	Zm00001eb202270_T001	0.844037	1.62973	0.517901	Purifying selection
AsGRAS14	Pepsico1_Contig27727.mrna1	Zm00001eb055700_T001	0.697497	1.26183	0.552766	Purifying selection
AsGRAS14	Pepsico1_Contig27727.mrna1	Zm00001eb325750_T001	0.794186	0.862568	0.920723	Purifying selection
AsGRAS14	Pepsico1_Contig27727.mrna1	Zm00001eb325750_T003	0.794186	0.862568	0.920723	Purifying selection
AsGRAS14	Pepsico1_Contig27727.mrna1	Zm00001eb049620_T001	0.822259	0.890329	0.923545	Purifying selection
AsGRAS14	Pepsico1_Contig27727.mrna1	Zm00001eb325750_T002	0.794186	0.862568	0.920723	Purifying selection
AsGRAS14	Pepsico1_Contig27727.mrna1	Zm00001eb215870_T001	0.699064	1.19444	0.585265	Purifying selection
AsGRAS14	Pepsico1_Contig27727.mrna1	Zm00001eb196430_T001	0.792512	0.808836	0.979819	Purifying selection
AsGRAS14	Pepsico1_Contig27727.mrna1	Zm00001eb019640_T001	0.834788	0.864006	0.966184	Purifying selection
AsGRAS14	Pepsico1_Contig27727.mrna1	Zm00001eb158520_T001	0.744552	0.847157	0.878883	Purifying selection
AsGRAS14	Pepsico1_Contig27727.mrna1	Zm00001eb195650_T001	0.809765	0.886985	0.912941	Purifying selection
AsGRAS14	Pepsico1_Contig27727.mrna1	Zm00001eb136350_T001	0.875337	1.00324	0.87251	Purifying selection
AsGRAS14	Pepsico1_Contig27727.mrna1	Zm00001eb136150_T001	0.880391	0.901289	0.976813	Purifying selection
AsGRAS14	Pepsico1_Contig27727.mrna1	Zm00001eb165340_T001	0.945935	1.93665	0.488439	Purifying selection
AsGRAS14	Pepsico1_Contig27727.mrna1	Zm00001eb108090_T001	0.845124	0.962072	0.878442	Purifying selection
AsGRAS14	Pepsico1_Contig27727.mrna1	Zm00001eb379340_T001	0.465209	0.881994	0.527452	Purifying selection
AsGRAS14	Pepsico1_Contig27727.mrna1	Zm00001eb165340_T002	0.961463	1.9584	0.490943	Purifying selection
AsGRAS14	Pepsico1_Contig27727.mrna1	Zm00001eb378590_T001	0.806367	0.762065	1.05813	Purifying selection
AsGRAS14	Pepsico1_Contig27727.mrna1	Zm00001eb054480_T001	0.831641	0.813202	1.02267	Purifying selection
AsGRAS14	Pepsico1_Contig27727.mrna1	Zm00001eb378590_T002	0.806367	0.762065	1.05813	Purifying selection
AsGRAS14	Pepsico1_Contig27727.mrna1	Zm00001eb054480_T002	0.796273	0.792242	1.00509	Purifying selection
AsGRAS14	Pepsico1_Contig27727.mrna1	Zm00001eb405080_T001	0.837639	0.994895	0.841937	Purifying selection
AsGRAS14	Pepsico1_Contig27727.mrna1	Zm00001eb285410_T001	0.87494	1.16463	0.751263	Purifying selection
AsGRAS14	Pepsico1_Contig27727.mrna1	Zm00001eb291930_T001	0.928897	0.894411	1.03856	Purifying selection
AsGRAS14	Pepsico1_Contig27727.mrna1	Zm00001eb000470_T001	0.226405	0.643375	0.351902	Purifying selection
AsGRAS14	Pepsico1_Contig27727.mrna1	Zm00001eb108250_T001	0.843608	0.843955	0.999589	Purifying selection
AsGRAS14	Pepsico1_Contig27727.mrna1	Zm00001eb108250_T002	0.843608	0.843955	0.999589	Purifying selection
AsGRAS14	Pepsico1_Contig27727.mrna1	Zm00001eb170110_T001	0.795591	0.864971	0.919789	Purifying selection
AsGRAS14	Pepsico1_Contig27727.mrna1	Zm00001eb164530_T001	0.921177	1.54295	0.597025	Purifying selection
AsGRAS14	Pepsico1_Contig27727.mrna1	Zm00001eb164530_T002	0.938435	2.02163	0.464198	Purifying selection
AsGRAS14	Pepsico1_Contig27727.mrna1	Zm00001eb139470_T001	0.812795	1.18139	0.688	Purifying selection
AsGRAS14	Pepsico1_Contig27727.mrna1	Zm00001eb392980_T001	0.801826	0.83427	0.961111	Purifying selection
AsGRAS14	Pepsico1_Contig27727.mrna1	Zm00001eb062760_T001	0.961411	2.64254	0.363821	Purifying selection
AsGRAS14	Pepsico1_Contig27727.mrna1	Zm00001eb301400_T001	0.120624	0.388498	0.310488	Purifying selection
AsGRAS14	Pepsico1_Contig27727.mrna1	Zm00001eb148290_T002	0.871729	1.55338	0.561181	Purifying selection
AsGRAS14	Pepsico1_Contig27727.mrna1	Zm00001eb148290_T001	0.871729	1.55338	0.561181	Purifying selection
AsGRAS14	Pepsico1_Contig27727.mrna1	Zm00001eb164350_T001	0.958196	1.07896	0.888072	Purifying selection
AsGRAS14	Pepsico1_Contig27727.mrna1	Zm00001eb236120_T001	0.693358	0.838887	0.826521	Purifying selection
AsGRAS14	Pepsico1_Contig27727.mrna1	Zm00001eb405090_T001	0.936256	0.955593	0.979764	Purifying selection
AsGRAS14	Pepsico1_Contig27727.mrna1	Zm00001eb164470_T001	1.02842	1.52729	0.67336	Purifying selection
AsGRAS14	Pepsico1_Contig27727.mrna1	Zm00001eb187310_T001	0.769465	0.942112	0.816745	Purifying selection
AsGRAS14	Pepsico1_Contig27727.mrna1	Zm00001eb388460_T001	0.709027	0.979879	0.723587	Purifying selection
AsGRAS14	Pepsico1_Contig27727.mrna1	Zm00001eb196420_T001	0.820342	0.79673	1.02964	Purifying selection
AsGRAS14	Pepsico1_Contig27727.mrna1	Zm00001eb136140_T001	1.09255	1.84912	0.590852	Purifying selection
AsGRAS14	Pepsico1_Contig27727.mrna1	Zm00001eb112130_T001	0.87304	1.90606	0.458035	Purifying selection
AsGRAS14	Pepsico1_Contig27727.mrna1	Zm00001eb093670_T002	0.811599	0.88316	0.918972	Purifying selection
AsGRAS14	Pepsico1_Contig27727.mrna1	Zm00001eb093670_T001	0.811164	0.846714	0.958014	Purifying selection
AsGRAS14	Pepsico1_Contig27727.mrna1	Zm00001eb067930_T001	0.33222	0.695883	0.477407	Purifying selection
AsGRAS14	Pepsico1_Contig27727.mrna1	Zm00001eb363140_T001	0.800649	1.0387	0.770816	Purifying selection
AsGRAS14	Pepsico1_Contig27727.mrna1	Zm00001eb324600_T001	0.728803	0.90819	0.802479	Purifying selection
AsGRAS14	Pepsico1_Contig27727.mrna1	Zm00001eb073130_T001	0.775064	1.03288	0.750391	Purifying selection
AsGRAS14	Pepsico1_Contig27727.mrna1	Zm00001eb115950_T001	0.874024	1.10535	0.790722	Purifying selection
AsGRAS14	Pepsico1_Contig27727.mrna1	Zm00001eb398990_T001	0.20395	0.721528	0.282665	Purifying selection
AsGRAS14	Pepsico1_Contig27727.mrna1	Zm00001eb082700_T001	0.754363	0.915762	0.823755	Purifying selection
AsGRAS14	Pepsico1_Contig27727.mrna1	Zm00001eb107910_T002	0.916537	1.1092	0.826302	Purifying selection
AsGRAS14	Pepsico1_Contig27727.mrna1	Zm00001eb107910_T001	0.916537	1.1092	0.826302	Purifying selection
AsGRAS14	Pepsico1_Contig27727.mrna1	Zm00001eb141310_T001	0.784436	0.875489	0.895998	Purifying selection
AsGRAS14	Pepsico1_Contig27727.mrna1	Zm00001eb326210_T001	0.885757	0.819466	1.0809	Purifying selection
AsGRAS14	Pepsico1_Contig27727.mrna1	Zm00001eb216610_T001	0.791022	0.760153	1.04061	Purifying selection
AsGRAS14	Pepsico1_Contig27727.mrna1	Zm00001eb249840_T001	0.477576	1.40442	0.340053	Purifying selection
AsGRAS14	Pepsico1_Contig27727.mrna1	Zm00001eb428430_T001	0.86901	1.06137	0.818764	Purifying selection
AsGRAS14	Pepsico1_Contig27727.mrna1	Zm00001eb249840_T002	0.44497	1.5209	0.29257	Purifying selection
AsGRAS14	Pepsico1_Contig27727.mrna1	Zm00001eb106490_T001	0.883665	2.86293	0.308658	Purifying selection
AsGRAS14	Pepsico1_Contig27727.mrna1	Zm00001eb081760_T001	0.929389	0.991447	0.937406	Purifying selection
AsGRAS14	Pepsico1_Contig27727.mrna1	Zm00001eb405110_T001	0.75418	0.83965	0.898207	Purifying selection
AsGRAS14	Pepsico1_Contig27727.mrna1	Zm00001eb164490_T001	0.913925	1.11044	0.823031	Purifying selection
AsGRAS14	Pepsico1_Contig27727.mrna1	Zm00001eb074460_T001	0.383355	1.40642	0.272576	Purifying selection
AsGRAS14	Pepsico1_Contig27727.mrna1	Zm00001eb186770_T002	0.42294	1.26902	0.333282	Purifying selection
AsGRAS14	Pepsico1_Contig27727.mrna1	Zm00001eb327300_T001	0.989405	1.72145	0.574752	Purifying selection
AsGRAS14	Pepsico1_Contig27727.mrna1	Zm00001eb326020_T001	0.881186	0.862115	1.02212	Purifying selection
AsGRAS14	Pepsico1_Contig27727.mrna1	Zm00001eb186770_T001	0.406923	1.28386	0.316954	Purifying selection
AsGRAS14	Pepsico1_Contig27727.mrna1	Zm00001eb020850_T001	0.947062	0.866563	1.09289	Purifying selection
AsGRAS14	Pepsico1_Contig27727.mrna1	Zm00001eb186770_T003	0.396408	1.42191	0.278785	Purifying selection
AsGRAS14	Pepsico1_Contig27727.mrna1	Zm00001eb429450_T001	0.381833	1.62469	0.23502	Purifying selection
AsGRAS14	Pepsico1_Contig27727.mrna1	Zm00001eb326550_T001	0.328192	1.36582	0.240289	Purifying selection
AsGRAS14	Pepsico1_Contig27727.mrna1	Zm00001eb029390_T001	0.849324	0.881706	0.963274	Purifying selection
AsGRAS14	Pepsico1_Contig27727.mrna1	Zm00001eb344400_T001	0.856636	2.09661	0.408582	Purifying selection
AsGRAS14	Pepsico1_Contig27727.mrna1	Zm00001eb002990_T001	0.27862	0.652465	0.427026	Purifying selection
AsGRAS14	Pepsico1_Contig27727.mrna1	Zm00001eb291030_T001	0.789904	1.15654	0.682987	Purifying selection
AsGRAS14	Pepsico1_Contig27727.mrna1	Zm00001eb288400_T002	0.903336	2.69893	0.334701	Purifying selection
AsGRAS14	Pepsico1_Contig27727.mrna1	Zm00001eb067940_T001	0.127345	0.516588	0.246511	Purifying selection
AsGRAS14	Pepsico1_Contig27727.mrna1	Zm00001eb288400_T001	0.903336	2.69893	0.334701	Purifying selection
AsGRAS14	Pepsico1_Contig27727.mrna1	Zm00001eb023010_T001	0.144868	0.479545	0.302096	Purifying selection
AsGRAS14	Pepsico1_Contig27727.mrna1	Zm00001eb422620_T001	0.697233	0.895171	0.778882	Purifying selection
AsGRAS15	Pepsico1_Contig30502.mrna1	Zm00001eb202270_T001	0.875011	2.85335	0.306661	Purifying selection
AsGRAS15	Pepsico1_Contig30502.mrna1	Zm00001eb133730_T001	0.945889	3.3085	0.285896	Purifying selection
AsGRAS15	Pepsico1_Contig30502.mrna1	Zm00001eb308090_T001	0.829454	0.998658	0.830568	Purifying selection
AsGRAS15	Pepsico1_Contig30502.mrna1	Zm00001eb401210_T001	0.178543	0.834984	0.213828	Purifying selection
AsGRAS15	Pepsico1_Contig30502.mrna1	Zm00001eb355870_T001	0.800686	1.51447	0.52869	Purifying selection
AsGRAS15	Pepsico1_Contig30502.mrna1	Zm00001eb062760_T001	0.769512	2.61671	0.294076	Purifying selection
AsGRAS15	Pepsico1_Contig30502.mrna1	Zm00001eb027720_T001	0.105027	0.642257	0.163528	Purifying selection
AsGRAS15	Pepsico1_Contig30502.mrna1	Zm00001eb027720_T002	0.105027	0.642257	0.163528	Purifying selection
AsGRAS15	Pepsico1_Contig30502.mrna1	Zm00001eb136140_T001	0.813425	2.48564	0.32725	Purifying selection
AsGRAS15	Pepsico1_Contig30502.mrna1	Zm00001eb249840_T002	0.863442	2.67444	0.322849	Purifying selection
AsGRAS15	Pepsico1_Contig30502.mrna1	Zm00001eb186770_T001	0.842922	2.85185	0.29557	Purifying selection
AsGRAS15	Pepsico1_Contig30502.mrna1	Zm00001eb186770_T003	0.838206	3.12518	0.26821	Purifying selection
AsGRAS15	Pepsico1_Contig30502.mrna1	Zm00001eb429450_T001	0.935379	4.13951	0.225964	Purifying selection
AsGRAS16	Pepsico2_Contig7359.mrna2	Zm00001eb399000_T001	0.116492	0.345274	0.337389	Purifying selection
AsGRAS16	Pepsico2_Contig7359.mrna2	Zm00001eb268460_T001	0.185969	0.526648	0.353118	Purifying selection
AsGRAS16	Pepsico2_Contig7359.mrna2	Zm00001eb301410_T001	0.204062	0.747468	0.273005	Purifying selection
AsGRAS16	Pepsico2_Contig7359.mrna2	Zm00001eb164500_T001	0.924878	0.991836	0.932491	Purifying selection
AsGRAS16	Pepsico2_Contig7359.mrna2	Zm00001eb164480_T001	0.830642	0.997618	0.832625	Purifying selection
AsGRAS16	Pepsico2_Contig7359.mrna2	Zm00001eb164480_T002	0.830642	0.997618	0.832625	Purifying selection
AsGRAS16	Pepsico2_Contig7359.mrna2	Zm00001eb011560_T001	0.837913	0.884062	0.947799	Purifying selection
AsGRAS16	Pepsico2_Contig7359.mrna2	Zm00001eb202270_T001	0.767089	1.69216	0.453318	Purifying selection
AsGRAS16	Pepsico2_Contig7359.mrna2	Zm00001eb055700_T001	0.749498	1.38682	0.540443	Purifying selection
AsGRAS16	Pepsico2_Contig7359.mrna2	Zm00001eb325750_T001	0.814115	0.891829	0.91286	Purifying selection
AsGRAS16	Pepsico2_Contig7359.mrna2	Zm00001eb325750_T003	0.814115	0.891829	0.91286	Purifying selection
AsGRAS16	Pepsico2_Contig7359.mrna2	Zm00001eb049620_T001	0.80801	0.872363	0.926231	Purifying selection
AsGRAS16	Pepsico2_Contig7359.mrna2	Zm00001eb325750_T002	0.814115	0.891829	0.91286	Purifying selection
AsGRAS16	Pepsico2_Contig7359.mrna2	Zm00001eb215870_T001	0.732823	1.23271	0.59448	Purifying selection
AsGRAS16	Pepsico2_Contig7359.mrna2	Zm00001eb196430_T001	0.843134	0.867167	0.972286	Purifying selection
AsGRAS16	Pepsico2_Contig7359.mrna2	Zm00001eb133730_T001	0.895638	0.96092	0.932063	Purifying selection
AsGRAS16	Pepsico2_Contig7359.mrna2	Zm00001eb019640_T001	0.843605	0.856678	0.98474	Purifying selection
AsGRAS16	Pepsico2_Contig7359.mrna2	Zm00001eb158520_T001	0.724892	0.817911	0.886272	Purifying selection
AsGRAS16	Pepsico2_Contig7359.mrna2	Zm00001eb266920_T001	1.02382	2.71383	0.37726	Purifying selection
AsGRAS16	Pepsico2_Contig7359.mrna2	Zm00001eb195650_T001	0.785104	0.938041	0.836961	Purifying selection
AsGRAS16	Pepsico2_Contig7359.mrna2	Zm00001eb136350_T001	0.853913	1.00672	0.848212	Purifying selection
AsGRAS16	Pepsico2_Contig7359.mrna2	Zm00001eb136150_T001	0.802652	1.02359	0.784157	Purifying selection
AsGRAS16	Pepsico2_Contig7359.mrna2	Zm00001eb165340_T001	0.919825	1.75945	0.52279	Purifying selection
AsGRAS16	Pepsico2_Contig7359.mrna2	Zm00001eb108090_T001	0.868689	0.934562	0.929515	Purifying selection
AsGRAS16	Pepsico2_Contig7359.mrna2	Zm00001eb379340_T001	0.470538	0.851765	0.552427	Purifying selection
AsGRAS16	Pepsico2_Contig7359.mrna2	Zm00001eb165340_T002	0.943192	1.74062	0.54187	Purifying selection
AsGRAS16	Pepsico2_Contig7359.mrna2	Zm00001eb378590_T001	0.8208	0.743705	1.10366	Purifying selection
AsGRAS16	Pepsico2_Contig7359.mrna2	Zm00001eb054480_T001	0.789028	0.829643	0.951045	Purifying selection
AsGRAS16	Pepsico2_Contig7359.mrna2	Zm00001eb378590_T002	0.8208	0.743705	1.10366	Purifying selection
AsGRAS16	Pepsico2_Contig7359.mrna2	Zm00001eb054480_T002	0.745569	0.840264	0.887303	Purifying selection
AsGRAS16	Pepsico2_Contig7359.mrna2	Zm00001eb405080_T001	0.816936	0.99407	0.82181	Purifying selection
AsGRAS16	Pepsico2_Contig7359.mrna2	Zm00001eb285410_T001	0.879111	1.03331	0.850775	Purifying selection
AsGRAS16	Pepsico2_Contig7359.mrna2	Zm00001eb291930_T001	0.924502	0.918317	1.00674	Purifying selection
AsGRAS16	Pepsico2_Contig7359.mrna2	Zm00001eb000470_T001	0.221932	0.649058	0.341929	Purifying selection
AsGRAS16	Pepsico2_Contig7359.mrna2	Zm00001eb108250_T001	0.858049	0.872623	0.983299	Purifying selection
AsGRAS16	Pepsico2_Contig7359.mrna2	Zm00001eb108250_T002	0.858049	0.872623	0.983299	Purifying selection
AsGRAS16	Pepsico2_Contig7359.mrna2	Zm00001eb170110_T001	0.808709	0.839784	0.962997	Purifying selection
AsGRAS16	Pepsico2_Contig7359.mrna2	Zm00001eb164530_T001	0.906605	1.51862	0.596992	Purifying selection
AsGRAS16	Pepsico2_Contig7359.mrna2	Zm00001eb164530_T002	0.890604	1.83075	0.48647	Purifying selection
AsGRAS16	Pepsico2_Contig7359.mrna2	Zm00001eb139470_T001	0.813976	1.0458	0.778325	Purifying selection
AsGRAS16	Pepsico2_Contig7359.mrna2	Zm00001eb392980_T001	0.711666	0.860916	0.826638	Purifying selection
AsGRAS16	Pepsico2_Contig7359.mrna2	Zm00001eb062760_T001	0.950131	2.24793	0.422669	Purifying selection
AsGRAS16	Pepsico2_Contig7359.mrna2	Zm00001eb301400_T001	0.116456	0.36039	0.323139	Purifying selection
AsGRAS16	Pepsico2_Contig7359.mrna2	Zm00001eb148290_T002	0.850881	1.61978	0.525307	Purifying selection
AsGRAS16	Pepsico2_Contig7359.mrna2	Zm00001eb148290_T001	0.850881	1.61978	0.525307	Purifying selection
AsGRAS16	Pepsico2_Contig7359.mrna2	Zm00001eb164350_T001	0.930449	1.0449	0.890466	Purifying selection
AsGRAS16	Pepsico2_Contig7359.mrna2	Zm00001eb236120_T001	0.661943	0.835967	0.79183	Purifying selection
AsGRAS16	Pepsico2_Contig7359.mrna2	Zm00001eb405090_T001	0.894691	1.12959	0.792049	Purifying selection
AsGRAS16	Pepsico2_Contig7359.mrna2	Zm00001eb164470_T001	1.05071	1.42441	0.737645	Purifying selection
AsGRAS16	Pepsico2_Contig7359.mrna2	Zm00001eb187310_T001	0.799966	0.92775	0.862264	Purifying selection
AsGRAS16	Pepsico2_Contig7359.mrna2	Zm00001eb388460_T001	0.762784	0.913083	0.835394	Purifying selection
AsGRAS16	Pepsico2_Contig7359.mrna2	Zm00001eb196420_T001	0.720041	0.942181	0.764228	Purifying selection
AsGRAS16	Pepsico2_Contig7359.mrna2	Zm00001eb136140_T001	0.902254	2.15103	0.419453	Purifying selection
AsGRAS16	Pepsico2_Contig7359.mrna2	Zm00001eb112130_T001	0.923156	1.60207	0.576226	Purifying selection
AsGRAS16	Pepsico2_Contig7359.mrna2	Zm00001eb093670_T002	0.789986	0.856197	0.922669	Purifying selection
AsGRAS16	Pepsico2_Contig7359.mrna2	Zm00001eb093670_T001	0.793648	0.822805	0.964564	Purifying selection
AsGRAS16	Pepsico2_Contig7359.mrna2	Zm00001eb067930_T001	0.340501	0.859238	0.396283	Purifying selection
AsGRAS16	Pepsico2_Contig7359.mrna2	Zm00001eb363140_T001	0.824271	0.97942	0.84159	Purifying selection
AsGRAS16	Pepsico2_Contig7359.mrna2	Zm00001eb324600_T001	0.711099	0.885439	0.803102	Purifying selection
AsGRAS16	Pepsico2_Contig7359.mrna2	Zm00001eb073130_T001	0.810192	1.00475	0.80636	Purifying selection
AsGRAS16	Pepsico2_Contig7359.mrna2	Zm00001eb115950_T001	0.863235	1.08771	0.793628	Purifying selection
AsGRAS16	Pepsico2_Contig7359.mrna2	Zm00001eb398990_T001	0.193972	0.749395	0.258839	Purifying selection
AsGRAS16	Pepsico2_Contig7359.mrna2	Zm00001eb082700_T001	0.781737	0.843033	0.927291	Purifying selection
AsGRAS16	Pepsico2_Contig7359.mrna2	Zm00001eb107910_T002	0.909679	1.04513	0.8704	Purifying selection
AsGRAS16	Pepsico2_Contig7359.mrna2	Zm00001eb107910_T001	0.909679	1.04513	0.8704	Purifying selection
AsGRAS16	Pepsico2_Contig7359.mrna2	Zm00001eb141310_T001	0.779601	0.923983	0.843739	Purifying selection
AsGRAS16	Pepsico2_Contig7359.mrna2	Zm00001eb326210_T001	0.891002	0.845152	1.05425	Purifying selection
AsGRAS16	Pepsico2_Contig7359.mrna2	Zm00001eb216610_T001	0.742519	0.79787	0.930627	Purifying selection
AsGRAS16	Pepsico2_Contig7359.mrna2	Zm00001eb249840_T001	0.481002	1.50683	0.319215	Purifying selection
AsGRAS16	Pepsico2_Contig7359.mrna2	Zm00001eb428430_T001	0.824287	1.0319	0.798803	Purifying selection
AsGRAS16	Pepsico2_Contig7359.mrna2	Zm00001eb249840_T002	0.447504	1.55842	0.287152	Purifying selection
AsGRAS16	Pepsico2_Contig7359.mrna2	Zm00001eb106490_T001	0.958838	2.18965	0.437895	Purifying selection
AsGRAS16	Pepsico2_Contig7359.mrna2	Zm00001eb081760_T001	0.979605	1.00239	0.97727	Purifying selection
AsGRAS16	Pepsico2_Contig7359.mrna2	Zm00001eb405110_T001	0.764202	0.703112	1.08689	Purifying selection
AsGRAS16	Pepsico2_Contig7359.mrna2	Zm00001eb164490_T001	0.909982	1.09447	0.831438	Purifying selection
AsGRAS16	Pepsico2_Contig7359.mrna2	Zm00001eb074460_T001	0.390309	1.36085	0.286813	Purifying selection
AsGRAS16	Pepsico2_Contig7359.mrna2	Zm00001eb186770_T002	0.430617	1.26826	0.339533	Purifying selection
AsGRAS16	Pepsico2_Contig7359.mrna2	Zm00001eb327300_T001	0.923635	1.73824	0.531363	Purifying selection
AsGRAS16	Pepsico2_Contig7359.mrna2	Zm00001eb326020_T001	0.887253	0.827086	1.07275	Purifying selection
AsGRAS16	Pepsico2_Contig7359.mrna2	Zm00001eb186770_T001	0.410401	1.30871	0.313591	Purifying selection
AsGRAS16	Pepsico2_Contig7359.mrna2	Zm00001eb020850_T001	0.91586	0.930309	0.984469	Purifying selection
AsGRAS16	Pepsico2_Contig7359.mrna2	Zm00001eb186770_T003	0.399795	1.44535	0.276607	Purifying selection
AsGRAS16	Pepsico2_Contig7359.mrna2	Zm00001eb429450_T001	0.393139	1.59315	0.246769	Purifying selection
AsGRAS16	Pepsico2_Contig7359.mrna2	Zm00001eb326550_T001	0.313883	1.35858	0.231037	Purifying selection
AsGRAS16	Pepsico2_Contig7359.mrna2	Zm00001eb029390_T001	0.895826	1.00453	0.891784	Purifying selection
AsGRAS16	Pepsico2_Contig7359.mrna2	Zm00001eb344400_T001	0.870545	2.12879	0.40894	Purifying selection
AsGRAS16	Pepsico2_Contig7359.mrna2	Zm00001eb002990_T001	0.20748	0.614105	0.337858	Purifying selection
AsGRAS16	Pepsico2_Contig7359.mrna2	Zm00001eb291030_T001	0.776472	1.06132	0.731612	Purifying selection
AsGRAS16	Pepsico2_Contig7359.mrna2	Zm00001eb067940_T001	0.116811	0.566433	0.206221	Purifying selection
AsGRAS16	Pepsico2_Contig7359.mrna2	Zm00001eb023010_T001	0.136601	0.449758	0.30372	Purifying selection
AsGRAS16	Pepsico2_Contig7359.mrna2	Zm00001eb422620_T001	0.709637	0.880814	0.805661	Purifying selection
AsGRAS17	Pepsico1_Contig18352.mrna1	Zm00001eb202270_T001	0.875011	2.85335	0.306661	Purifying selection
AsGRAS17	Pepsico1_Contig18352.mrna1	Zm00001eb133730_T001	0.945889	3.3085	0.285896	Purifying selection
AsGRAS17	Pepsico1_Contig18352.mrna1	Zm00001eb308090_T001	0.829454	0.998658	0.830568	Purifying selection
AsGRAS17	Pepsico1_Contig18352.mrna1	Zm00001eb401210_T001	0.178543	0.834984	0.213828	Purifying selection
AsGRAS17	Pepsico1_Contig18352.mrna1	Zm00001eb355870_T001	0.800686	1.51447	0.52869	Purifying selection
AsGRAS17	Pepsico1_Contig18352.mrna1	Zm00001eb062760_T001	0.769512	2.61671	0.294076	Purifying selection
AsGRAS17	Pepsico1_Contig18352.mrna1	Zm00001eb027720_T001	0.105027	0.642257	0.163528	Purifying selection
AsGRAS17	Pepsico1_Contig18352.mrna1	Zm00001eb027720_T002	0.105027	0.642257	0.163528	Purifying selection
AsGRAS17	Pepsico1_Contig18352.mrna1	Zm00001eb136140_T001	0.813425	2.48564	0.32725	Purifying selection
AsGRAS17	Pepsico1_Contig18352.mrna1	Zm00001eb249840_T002	0.863442	2.67444	0.322849	Purifying selection
AsGRAS17	Pepsico1_Contig18352.mrna1	Zm00001eb186770_T001	0.842922	2.85185	0.29557	Purifying selection
AsGRAS17	Pepsico1_Contig18352.mrna1	Zm00001eb186770_T003	0.838206	3.12518	0.26821	Purifying selection
AsGRAS17	Pepsico1_Contig18352.mrna1	Zm00001eb429450_T001	0.935379	4.13951	0.225964	Purifying selection
AsGRAS18	Pepsico2_Contig16943.mrna3	Zm00001eb202270_T001	0.898919	3.67098	0.244872	Purifying selection
AsGRAS18	Pepsico2_Contig16943.mrna3	Zm00001eb133730_T001	0.835213	2.5673	0.325328	Purifying selection
AsGRAS18	Pepsico2_Contig16943.mrna3	Zm00001eb308090_T001	0.750985	1.50632	0.498555	Purifying selection
AsGRAS18	Pepsico2_Contig16943.mrna3	Zm00001eb401210_T001	0.151048	0.65434	0.23084	Purifying selection
AsGRAS18	Pepsico2_Contig16943.mrna3	Zm00001eb397720_T001	0.907853	3.37271	0.269176	Purifying selection
AsGRAS18	Pepsico2_Contig16943.mrna3	Zm00001eb397720_T002	0.907853	3.37271	0.269176	Purifying selection
AsGRAS18	Pepsico2_Contig16943.mrna3	Zm00001eb405090_T001	0.780252	3.58368	0.217724	Purifying selection
AsGRAS18	Pepsico2_Contig16943.mrna3	Zm00001eb027720_T001	0.181216	1.04468	0.173465	Purifying selection
AsGRAS18	Pepsico2_Contig16943.mrna3	Zm00001eb027720_T002	0.181216	1.04468	0.173465	Purifying selection
AsGRAS18	Pepsico2_Contig16943.mrna3	Zm00001eb136140_T001	0.883226	3.39338	0.260279	Purifying selection
AsGRAS18	Pepsico2_Contig16943.mrna3	Zm00001eb067930_T001	1.05519	2.15633	0.489344	Purifying selection
AsGRAS18	Pepsico2_Contig16943.mrna3	Zm00001eb106490_T001	0.449779	3.14664	0.142939	Purifying selection
AsGRAS18	Pepsico2_Contig16943.mrna3	Zm00001eb288400_T002	0.550575	3.45322	0.159438	Purifying selection
AsGRAS18	Pepsico2_Contig16943.mrna3	Zm00001eb288400_T001	0.550575	3.45322	0.159438	Purifying selection
AsGRAS19	Pepsico2_Contig5101.mrna1	Zm00001eb202270_T001	0.898919	3.67098	0.244872	Purifying selection
AsGRAS19	Pepsico2_Contig5101.mrna1	Zm00001eb133730_T001	0.835213	2.5673	0.325328	Purifying selection
AsGRAS19	Pepsico2_Contig5101.mrna1	Zm00001eb308090_T001	0.750985	1.50632	0.498555	Purifying selection
AsGRAS19	Pepsico2_Contig5101.mrna1	Zm00001eb401210_T001	0.151048	0.65434	0.23084	Purifying selection
AsGRAS19	Pepsico2_Contig5101.mrna1	Zm00001eb397720_T001	0.907853	3.37271	0.269176	Purifying selection
AsGRAS19	Pepsico2_Contig5101.mrna1	Zm00001eb397720_T002	0.907853	3.37271	0.269176	Purifying selection
AsGRAS19	Pepsico2_Contig5101.mrna1	Zm00001eb405090_T001	0.780252	3.58368	0.217724	Purifying selection
AsGRAS19	Pepsico2_Contig5101.mrna1	Zm00001eb027720_T001	0.181216	1.04468	0.173465	Purifying selection
AsGRAS19	Pepsico2_Contig5101.mrna1	Zm00001eb027720_T002	0.181216	1.04468	0.173465	Purifying selection
AsGRAS19	Pepsico2_Contig5101.mrna1	Zm00001eb136140_T001	0.883226	3.39338	0.260279	Purifying selection
AsGRAS19	Pepsico2_Contig5101.mrna1	Zm00001eb067930_T001	1.05519	2.15633	0.489344	Purifying selection
AsGRAS19	Pepsico2_Contig5101.mrna1	Zm00001eb106490_T001	0.449779	3.14664	0.142939	Purifying selection
AsGRAS19	Pepsico2_Contig5101.mrna1	Zm00001eb288400_T002	0.550575	3.45322	0.159438	Purifying selection
AsGRAS19	Pepsico2_Contig5101.mrna1	Zm00001eb288400_T001	0.550575	3.45322	0.159438	Purifying selection
AsGRAS20	Pepsico2_Contig1709.mrna1	Zm00001eb202270_T001	0.875011	2.85335	0.306661	Purifying selection
AsGRAS20	Pepsico2_Contig1709.mrna1	Zm00001eb133730_T001	0.945889	3.3085	0.285896	Purifying selection
AsGRAS20	Pepsico2_Contig1709.mrna1	Zm00001eb308090_T001	0.829454	0.998658	0.830568	Purifying selection
AsGRAS20	Pepsico2_Contig1709.mrna1	Zm00001eb401210_T001	0.178543	0.834984	0.213828	Purifying selection
AsGRAS20	Pepsico2_Contig1709.mrna1	Zm00001eb355870_T001	0.800686	1.51447	0.52869	Purifying selection
AsGRAS20	Pepsico2_Contig1709.mrna1	Zm00001eb062760_T001	0.769512	2.61671	0.294076	Purifying selection
AsGRAS20	Pepsico2_Contig1709.mrna1	Zm00001eb027720_T001	0.105027	0.642257	0.163528	Purifying selection
AsGRAS20	Pepsico2_Contig1709.mrna1	Zm00001eb027720_T002	0.105027	0.642257	0.163528	Purifying selection
AsGRAS20	Pepsico2_Contig1709.mrna1	Zm00001eb136140_T001	0.813425	2.48564	0.32725	Purifying selection
AsGRAS20	Pepsico2_Contig1709.mrna1	Zm00001eb249840_T002	0.863442	2.67444	0.322849	Purifying selection
AsGRAS20	Pepsico2_Contig1709.mrna1	Zm00001eb186770_T001	0.842922	2.85185	0.29557	Purifying selection
AsGRAS20	Pepsico2_Contig1709.mrna1	Zm00001eb186770_T003	0.838206	3.12518	0.26821	Purifying selection
AsGRAS20	Pepsico2_Contig1709.mrna1	Zm00001eb429450_T001	0.935379	4.13951	0.225964	Purifying selection
AsGRAS21	Pepsico1_Contig29889.mrna2	Zm00001eb399000_T001	0.116492	0.345274	0.337389	Purifying selection
AsGRAS21	Pepsico1_Contig29889.mrna2	Zm00001eb268460_T001	0.185969	0.526648	0.353118	Purifying selection
AsGRAS21	Pepsico1_Contig29889.mrna2	Zm00001eb301410_T001	0.204062	0.747468	0.273005	Purifying selection
AsGRAS21	Pepsico1_Contig29889.mrna2	Zm00001eb164500_T001	0.924878	0.991836	0.932491	Purifying selection
AsGRAS21	Pepsico1_Contig29889.mrna2	Zm00001eb164480_T001	0.830642	0.997618	0.832625	Purifying selection
AsGRAS21	Pepsico1_Contig29889.mrna2	Zm00001eb164480_T002	0.830642	0.997618	0.832625	Purifying selection
AsGRAS21	Pepsico1_Contig29889.mrna2	Zm00001eb011560_T001	0.837913	0.884062	0.947799	Purifying selection
AsGRAS21	Pepsico1_Contig29889.mrna2	Zm00001eb202270_T001	0.767089	1.69216	0.453318	Purifying selection
AsGRAS21	Pepsico1_Contig29889.mrna2	Zm00001eb055700_T001	0.749498	1.38682	0.540443	Purifying selection
AsGRAS21	Pepsico1_Contig29889.mrna2	Zm00001eb325750_T001	0.814115	0.891829	0.91286	Purifying selection
AsGRAS21	Pepsico1_Contig29889.mrna2	Zm00001eb325750_T003	0.814115	0.891829	0.91286	Purifying selection
AsGRAS21	Pepsico1_Contig29889.mrna2	Zm00001eb049620_T001	0.80801	0.872363	0.926231	Purifying selection
AsGRAS21	Pepsico1_Contig29889.mrna2	Zm00001eb325750_T002	0.814115	0.891829	0.91286	Purifying selection
AsGRAS21	Pepsico1_Contig29889.mrna2	Zm00001eb215870_T001	0.732823	1.23271	0.59448	Purifying selection
AsGRAS21	Pepsico1_Contig29889.mrna2	Zm00001eb196430_T001	0.843134	0.867167	0.972286	Purifying selection
AsGRAS21	Pepsico1_Contig29889.mrna2	Zm00001eb133730_T001	0.895638	0.96092	0.932063	Purifying selection
AsGRAS21	Pepsico1_Contig29889.mrna2	Zm00001eb019640_T001	0.843605	0.856678	0.98474	Purifying selection
AsGRAS21	Pepsico1_Contig29889.mrna2	Zm00001eb158520_T001	0.724892	0.817911	0.886272	Purifying selection
AsGRAS21	Pepsico1_Contig29889.mrna2	Zm00001eb266920_T001	1.02382	2.71383	0.37726	Purifying selection
AsGRAS21	Pepsico1_Contig29889.mrna2	Zm00001eb195650_T001	0.785104	0.938041	0.836961	Purifying selection
AsGRAS21	Pepsico1_Contig29889.mrna2	Zm00001eb136350_T001	0.853913	1.00672	0.848212	Purifying selection
AsGRAS21	Pepsico1_Contig29889.mrna2	Zm00001eb136150_T001	0.802652	1.02359	0.784157	Purifying selection
AsGRAS21	Pepsico1_Contig29889.mrna2	Zm00001eb165340_T001	0.919825	1.75945	0.52279	Purifying selection
AsGRAS21	Pepsico1_Contig29889.mrna2	Zm00001eb108090_T001	0.868689	0.934562	0.929515	Purifying selection
AsGRAS21	Pepsico1_Contig29889.mrna2	Zm00001eb379340_T001	0.470538	0.851765	0.552427	Purifying selection
AsGRAS21	Pepsico1_Contig29889.mrna2	Zm00001eb165340_T002	0.943192	1.74062	0.54187	Purifying selection
AsGRAS21	Pepsico1_Contig29889.mrna2	Zm00001eb378590_T001	0.8208	0.743705	1.10366	Purifying selection
AsGRAS21	Pepsico1_Contig29889.mrna2	Zm00001eb054480_T001	0.789028	0.829643	0.951045	Purifying selection
AsGRAS21	Pepsico1_Contig29889.mrna2	Zm00001eb378590_T002	0.8208	0.743705	1.10366	Purifying selection
AsGRAS21	Pepsico1_Contig29889.mrna2	Zm00001eb054480_T002	0.745569	0.840264	0.887303	Purifying selection
AsGRAS21	Pepsico1_Contig29889.mrna2	Zm00001eb405080_T001	0.816936	0.99407	0.82181	Purifying selection
AsGRAS21	Pepsico1_Contig29889.mrna2	Zm00001eb285410_T001	0.879111	1.03331	0.850775	Purifying selection
AsGRAS21	Pepsico1_Contig29889.mrna2	Zm00001eb291930_T001	0.924502	0.918317	1.00674	Purifying selection
AsGRAS21	Pepsico1_Contig29889.mrna2	Zm00001eb000470_T001	0.221932	0.649058	0.341929	Purifying selection
AsGRAS21	Pepsico1_Contig29889.mrna2	Zm00001eb108250_T001	0.858049	0.872623	0.983299	Purifying selection
AsGRAS21	Pepsico1_Contig29889.mrna2	Zm00001eb108250_T002	0.858049	0.872623	0.983299	Purifying selection
AsGRAS21	Pepsico1_Contig29889.mrna2	Zm00001eb170110_T001	0.808709	0.839784	0.962997	Purifying selection
AsGRAS21	Pepsico1_Contig29889.mrna2	Zm00001eb164530_T001	0.906605	1.51862	0.596992	Purifying selection
AsGRAS21	Pepsico1_Contig29889.mrna2	Zm00001eb164530_T002	0.890604	1.83075	0.48647	Purifying selection
AsGRAS21	Pepsico1_Contig29889.mrna2	Zm00001eb139470_T001	0.813976	1.0458	0.778325	Purifying selection
AsGRAS21	Pepsico1_Contig29889.mrna2	Zm00001eb392980_T001	0.711666	0.860916	0.826638	Purifying selection
AsGRAS21	Pepsico1_Contig29889.mrna2	Zm00001eb062760_T001	0.950131	2.24793	0.422669	Purifying selection
AsGRAS21	Pepsico1_Contig29889.mrna2	Zm00001eb301400_T001	0.116456	0.36039	0.323139	Purifying selection
AsGRAS21	Pepsico1_Contig29889.mrna2	Zm00001eb148290_T002	0.850881	1.61978	0.525307	Purifying selection
AsGRAS21	Pepsico1_Contig29889.mrna2	Zm00001eb148290_T001	0.850881	1.61978	0.525307	Purifying selection
AsGRAS21	Pepsico1_Contig29889.mrna2	Zm00001eb164350_T001	0.930449	1.0449	0.890466	Purifying selection
AsGRAS21	Pepsico1_Contig29889.mrna2	Zm00001eb236120_T001	0.661943	0.835967	0.79183	Purifying selection
AsGRAS21	Pepsico1_Contig29889.mrna2	Zm00001eb405090_T001	0.894691	1.12959	0.792049	Purifying selection
AsGRAS21	Pepsico1_Contig29889.mrna2	Zm00001eb164470_T001	1.05071	1.42441	0.737645	Purifying selection
AsGRAS21	Pepsico1_Contig29889.mrna2	Zm00001eb187310_T001	0.799966	0.92775	0.862264	Purifying selection
AsGRAS21	Pepsico1_Contig29889.mrna2	Zm00001eb388460_T001	0.762784	0.913083	0.835394	Purifying selection
AsGRAS21	Pepsico1_Contig29889.mrna2	Zm00001eb196420_T001	0.720041	0.942181	0.764228	Purifying selection
AsGRAS21	Pepsico1_Contig29889.mrna2	Zm00001eb136140_T001	0.902254	2.15103	0.419453	Purifying selection
AsGRAS21	Pepsico1_Contig29889.mrna2	Zm00001eb112130_T001	0.923156	1.60207	0.576226	Purifying selection
AsGRAS21	Pepsico1_Contig29889.mrna2	Zm00001eb093670_T002	0.789986	0.856197	0.922669	Purifying selection
AsGRAS21	Pepsico1_Contig29889.mrna2	Zm00001eb093670_T001	0.793648	0.822805	0.964564	Purifying selection
AsGRAS21	Pepsico1_Contig29889.mrna2	Zm00001eb067930_T001	0.340501	0.859238	0.396283	Purifying selection
AsGRAS21	Pepsico1_Contig29889.mrna2	Zm00001eb363140_T001	0.824271	0.97942	0.84159	Purifying selection
AsGRAS21	Pepsico1_Contig29889.mrna2	Zm00001eb324600_T001	0.711099	0.885439	0.803102	Purifying selection
AsGRAS21	Pepsico1_Contig29889.mrna2	Zm00001eb073130_T001	0.810192	1.00475	0.80636	Purifying selection
AsGRAS21	Pepsico1_Contig29889.mrna2	Zm00001eb115950_T001	0.863235	1.08771	0.793628	Purifying selection
AsGRAS21	Pepsico1_Contig29889.mrna2	Zm00001eb398990_T001	0.193972	0.749395	0.258839	Purifying selection
AsGRAS21	Pepsico1_Contig29889.mrna2	Zm00001eb082700_T001	0.781737	0.843033	0.927291	Purifying selection
AsGRAS21	Pepsico1_Contig29889.mrna2	Zm00001eb107910_T002	0.909679	1.04513	0.8704	Purifying selection
AsGRAS21	Pepsico1_Contig29889.mrna2	Zm00001eb107910_T001	0.909679	1.04513	0.8704	Purifying selection
AsGRAS21	Pepsico1_Contig29889.mrna2	Zm00001eb141310_T001	0.779601	0.923983	0.843739	Purifying selection
AsGRAS21	Pepsico1_Contig29889.mrna2	Zm00001eb326210_T001	0.891002	0.845152	1.05425	Purifying selection
AsGRAS21	Pepsico1_Contig29889.mrna2	Zm00001eb216610_T001	0.742519	0.79787	0.930627	Purifying selection
AsGRAS21	Pepsico1_Contig29889.mrna2	Zm00001eb249840_T001	0.481002	1.50683	0.319215	Purifying selection
AsGRAS21	Pepsico1_Contig29889.mrna2	Zm00001eb428430_T001	0.824287	1.0319	0.798803	Purifying selection
AsGRAS21	Pepsico1_Contig29889.mrna2	Zm00001eb249840_T002	0.447504	1.55842	0.287152	Purifying selection
AsGRAS21	Pepsico1_Contig29889.mrna2	Zm00001eb106490_T001	0.958838	2.18965	0.437895	Purifying selection
AsGRAS21	Pepsico1_Contig29889.mrna2	Zm00001eb081760_T001	0.979605	1.00239	0.97727	Purifying selection
AsGRAS21	Pepsico1_Contig29889.mrna2	Zm00001eb405110_T001	0.764202	0.703112	1.08689	Purifying selection
AsGRAS21	Pepsico1_Contig29889.mrna2	Zm00001eb164490_T001	0.909982	1.09447	0.831438	Purifying selection
AsGRAS21	Pepsico1_Contig29889.mrna2	Zm00001eb074460_T001	0.390309	1.36085	0.286813	Purifying selection
AsGRAS21	Pepsico1_Contig29889.mrna2	Zm00001eb186770_T002	0.430617	1.26826	0.339533	Purifying selection
AsGRAS21	Pepsico1_Contig29889.mrna2	Zm00001eb327300_T001	0.923635	1.73824	0.531363	Purifying selection
AsGRAS21	Pepsico1_Contig29889.mrna2	Zm00001eb326020_T001	0.887253	0.827086	1.07275	Purifying selection
AsGRAS21	Pepsico1_Contig29889.mrna2	Zm00001eb186770_T001	0.410401	1.30871	0.313591	Purifying selection
AsGRAS21	Pepsico1_Contig29889.mrna2	Zm00001eb020850_T001	0.91586	0.930309	0.984469	Purifying selection
AsGRAS21	Pepsico1_Contig29889.mrna2	Zm00001eb186770_T003	0.399795	1.44535	0.276607	Purifying selection
AsGRAS21	Pepsico1_Contig29889.mrna2	Zm00001eb429450_T001	0.393139	1.59315	0.246769	Purifying selection
AsGRAS21	Pepsico1_Contig29889.mrna2	Zm00001eb326550_T001	0.313883	1.35858	0.231037	Purifying selection
AsGRAS21	Pepsico1_Contig29889.mrna2	Zm00001eb029390_T001	0.895826	1.00453	0.891784	Purifying selection
AsGRAS21	Pepsico1_Contig29889.mrna2	Zm00001eb344400_T001	0.870545	2.12879	0.40894	Purifying selection
AsGRAS21	Pepsico1_Contig29889.mrna2	Zm00001eb002990_T001	0.20748	0.614105	0.337858	Purifying selection
AsGRAS21	Pepsico1_Contig29889.mrna2	Zm00001eb291030_T001	0.776472	1.06132	0.731612	Purifying selection
AsGRAS21	Pepsico1_Contig29889.mrna2	Zm00001eb067940_T001	0.116811	0.566433	0.206221	Purifying selection
AsGRAS21	Pepsico1_Contig29889.mrna2	Zm00001eb023010_T001	0.136601	0.449758	0.30372	Purifying selection
AsGRAS21	Pepsico1_Contig29889.mrna2	Zm00001eb422620_T001	0.709637	0.880814	0.805661	Purifying selection
AsGRAS22	Pepsico1_Contig17925.mrna1	Zm00001eb399000_T001	0.8713	1.89785	0.459099	Purifying selection
AsGRAS22	Pepsico1_Contig17925.mrna1	Zm00001eb268460_T001	1.09218	1.44922	0.753632	Purifying selection
AsGRAS22	Pepsico1_Contig17925.mrna1	Zm00001eb301410_T001	0.904393	1.18689	0.761984	Purifying selection
AsGRAS22	Pepsico1_Contig17925.mrna1	Zm00001eb164500_T001	0.890979	2.23744	0.398213	Purifying selection
AsGRAS22	Pepsico1_Contig17925.mrna1	Zm00001eb164480_T001	0.851239	1.76002	0.483653	Purifying selection
AsGRAS22	Pepsico1_Contig17925.mrna1	Zm00001eb164480_T002	0.851239	1.76002	0.483653	Purifying selection
AsGRAS22	Pepsico1_Contig17925.mrna1	Zm00001eb011560_T001	0.701564	1.48322	0.473001	Purifying selection
AsGRAS22	Pepsico1_Contig17925.mrna1	Zm00001eb055700_T001	0.795919	2.24877	0.353935	Purifying selection
AsGRAS22	Pepsico1_Contig17925.mrna1	Zm00001eb325750_T001	0.19622	0.895046	0.219228	Purifying selection
AsGRAS22	Pepsico1_Contig17925.mrna1	Zm00001eb325750_T003	0.19622	0.895046	0.219228	Purifying selection
AsGRAS22	Pepsico1_Contig17925.mrna1	Zm00001eb049620_T001	0.93386	1.84956	0.504911	Purifying selection
AsGRAS22	Pepsico1_Contig17925.mrna1	Zm00001eb325750_T002	0.19622	0.895046	0.219228	Purifying selection
AsGRAS22	Pepsico1_Contig17925.mrna1	Zm00001eb215870_T001	0.840351	1.98138	0.424124	Purifying selection
AsGRAS22	Pepsico1_Contig17925.mrna1	Zm00001eb196430_T001	0.791501	1.13973	0.694466	Purifying selection
AsGRAS22	Pepsico1_Contig17925.mrna1	Zm00001eb133730_T001	1.22334	2.13258	0.573645	Purifying selection
AsGRAS22	Pepsico1_Contig17925.mrna1	Zm00001eb019640_T001	0.878794	1.7816	0.49326	Purifying selection
AsGRAS22	Pepsico1_Contig17925.mrna1	Zm00001eb158520_T001	0.865043	1.4419	0.599934	Purifying selection
AsGRAS22	Pepsico1_Contig17925.mrna1	Zm00001eb266920_T001	1.00535	1.51023	0.66569	Purifying selection
AsGRAS22	Pepsico1_Contig17925.mrna1	Zm00001eb195650_T001	0.939225	1.41482	0.663846	Purifying selection
AsGRAS22	Pepsico1_Contig17925.mrna1	Zm00001eb136350_T001	0.851753	2.12874	0.400122	Purifying selection
AsGRAS22	Pepsico1_Contig17925.mrna1	Zm00001eb401210_T001	0.369683	2.49656	0.148077	Purifying selection
AsGRAS22	Pepsico1_Contig17925.mrna1	Zm00001eb136150_T001	1.05905	1.87561	0.564641	Purifying selection
AsGRAS22	Pepsico1_Contig17925.mrna1	Zm00001eb108090_T001	0.91257	1.7133	0.532639	Purifying selection
AsGRAS22	Pepsico1_Contig17925.mrna1	Zm00001eb379340_T001	1.17834	1.60984	0.731961	Purifying selection
AsGRAS22	Pepsico1_Contig17925.mrna1	Zm00001eb378590_T001	0.989743	1.62568	0.608819	Purifying selection
AsGRAS22	Pepsico1_Contig17925.mrna1	Zm00001eb054480_T001	0.822391	1.25166	0.657039	Purifying selection
AsGRAS22	Pepsico1_Contig17925.mrna1	Zm00001eb378590_T002	0.989743	1.62568	0.608819	Purifying selection
AsGRAS22	Pepsico1_Contig17925.mrna1	Zm00001eb054480_T002	0.823719	1.24631	0.660928	Purifying selection
AsGRAS22	Pepsico1_Contig17925.mrna1	Zm00001eb405080_T001	0.935159	1.06798	0.875635	Purifying selection
AsGRAS22	Pepsico1_Contig17925.mrna1	Zm00001eb285410_T001	1.17467	1.65314	0.710568	Purifying selection
AsGRAS22	Pepsico1_Contig17925.mrna1	Zm00001eb291930_T001	0.855579	1.33981	0.638581	Purifying selection
AsGRAS22	Pepsico1_Contig17925.mrna1	Zm00001eb000470_T001	0.9861	1.73655	0.567852	Purifying selection
AsGRAS22	Pepsico1_Contig17925.mrna1	Zm00001eb108250_T001	0.930085	1.53273	0.606817	Purifying selection
AsGRAS22	Pepsico1_Contig17925.mrna1	Zm00001eb108250_T002	0.930085	1.53273	0.606817	Purifying selection
AsGRAS22	Pepsico1_Contig17925.mrna1	Zm00001eb170110_T001	0.849173	1.93994	0.437732	Purifying selection
AsGRAS22	Pepsico1_Contig17925.mrna1	Zm00001eb164530_T001	0.903189	2.56112	0.352654	Purifying selection
AsGRAS22	Pepsico1_Contig17925.mrna1	Zm00001eb139470_T001	0.901623	2.06098	0.437473	Purifying selection
AsGRAS22	Pepsico1_Contig17925.mrna1	Zm00001eb392980_T001	0.926431	1.81935	0.50921	Purifying selection
AsGRAS22	Pepsico1_Contig17925.mrna1	Zm00001eb062760_T001	0.978226	5.2497	0.186339	Purifying selection
AsGRAS22	Pepsico1_Contig17925.mrna1	Zm00001eb301400_T001	0.949857	1.7085	0.555961	Purifying selection
AsGRAS22	Pepsico1_Contig17925.mrna1	Zm00001eb148290_T002	0.882547	3.76458	0.234435	Purifying selection
AsGRAS22	Pepsico1_Contig17925.mrna1	Zm00001eb148290_T001	0.882547	3.76458	0.234435	Purifying selection
AsGRAS22	Pepsico1_Contig17925.mrna1	Zm00001eb164350_T001	0.940219	1.71064	0.54963	Purifying selection
AsGRAS22	Pepsico1_Contig17925.mrna1	Zm00001eb236120_T001	0.944261	2.22121	0.425111	Purifying selection
AsGRAS22	Pepsico1_Contig17925.mrna1	Zm00001eb405090_T001	1.0653	1.79378	0.593884	Purifying selection
AsGRAS22	Pepsico1_Contig17925.mrna1	Zm00001eb164470_T001	0.904343	2.28947	0.395001	Purifying selection
AsGRAS22	Pepsico1_Contig17925.mrna1	Zm00001eb187310_T001	0.957635	1.64086	0.583618	Purifying selection
AsGRAS22	Pepsico1_Contig17925.mrna1	Zm00001eb388460_T001	0.927265	1.99208	0.465476	Purifying selection
AsGRAS22	Pepsico1_Contig17925.mrna1	Zm00001eb027720_T001	0.490053	2.10726	0.232555	Purifying selection
AsGRAS22	Pepsico1_Contig17925.mrna1	Zm00001eb027720_T002	0.490053	2.10726	0.232555	Purifying selection
AsGRAS22	Pepsico1_Contig17925.mrna1	Zm00001eb196420_T001	0.966377	1.59093	0.607429	Purifying selection
AsGRAS22	Pepsico1_Contig17925.mrna1	Zm00001eb136140_T001	1.0467	2.8302	0.369833	Purifying selection
AsGRAS22	Pepsico1_Contig17925.mrna1	Zm00001eb112130_T001	1.12217	2.08561	0.538053	Purifying selection
AsGRAS22	Pepsico1_Contig17925.mrna1	Zm00001eb093670_T002	0.989647	1.58898	0.62282	Purifying selection
AsGRAS22	Pepsico1_Contig17925.mrna1	Zm00001eb093670_T001	0.989647	1.58898	0.62282	Purifying selection
AsGRAS22	Pepsico1_Contig17925.mrna1	Zm00001eb067930_T001	1.22952	2.11066	0.582531	Purifying selection
AsGRAS22	Pepsico1_Contig17925.mrna1	Zm00001eb363140_T001	1.01253	2.03467	0.497642	Purifying selection
AsGRAS22	Pepsico1_Contig17925.mrna1	Zm00001eb324600_T001	0.862259	1.47245	0.585595	Purifying selection
AsGRAS22	Pepsico1_Contig17925.mrna1	Zm00001eb073130_T001	1.01446	1.36522	0.743071	Purifying selection
AsGRAS22	Pepsico1_Contig17925.mrna1	Zm00001eb115950_T001	0.979568	1.42586	0.687002	Purifying selection
AsGRAS22	Pepsico1_Contig17925.mrna1	Zm00001eb398990_T001	0.905249	1.10297	0.820738	Purifying selection
AsGRAS22	Pepsico1_Contig17925.mrna1	Zm00001eb082700_T001	0.706828	1.69722	0.416463	Purifying selection
AsGRAS22	Pepsico1_Contig17925.mrna1	Zm00001eb107910_T002	0.169311	0.876088	0.193258	Purifying selection
AsGRAS22	Pepsico1_Contig17925.mrna1	Zm00001eb107910_T001	0.169311	0.876088	0.193258	Purifying selection
AsGRAS22	Pepsico1_Contig17925.mrna1	Zm00001eb141310_T001	1.00025	1.8583	0.538262	Purifying selection
AsGRAS22	Pepsico1_Contig17925.mrna1	Zm00001eb326210_T001	0.833564	1.16009	0.718536	Purifying selection
AsGRAS22	Pepsico1_Contig17925.mrna1	Zm00001eb216610_T001	0.774961	1.34081	0.577981	Purifying selection
AsGRAS22	Pepsico1_Contig17925.mrna1	Zm00001eb249840_T001	0.961552	1.9419	0.49516	Purifying selection
AsGRAS22	Pepsico1_Contig17925.mrna1	Zm00001eb428430_T001	0.914478	1.43489	0.637314	Purifying selection
AsGRAS22	Pepsico1_Contig17925.mrna1	Zm00001eb249840_T002	0.961552	1.9419	0.49516	Purifying selection
AsGRAS22	Pepsico1_Contig17925.mrna1	Zm00001eb081760_T001	0.977034	1.89275	0.516199	Purifying selection
AsGRAS22	Pepsico1_Contig17925.mrna1	Zm00001eb405110_T001	0.947727	1.41317	0.670638	Purifying selection
AsGRAS22	Pepsico1_Contig17925.mrna1	Zm00001eb164490_T001	0.948308	2.4429	0.38819	Purifying selection
AsGRAS22	Pepsico1_Contig17925.mrna1	Zm00001eb074460_T001	0.752831	2.4616	0.30583	Purifying selection
AsGRAS22	Pepsico1_Contig17925.mrna1	Zm00001eb186770_T002	0.969791	1.70564	0.568579	Purifying selection
AsGRAS22	Pepsico1_Contig17925.mrna1	Zm00001eb326020_T001	0.937232	3.89538	0.240601	Purifying selection
AsGRAS22	Pepsico1_Contig17925.mrna1	Zm00001eb186770_T001	0.969791	1.70564	0.568579	Purifying selection
AsGRAS22	Pepsico1_Contig17925.mrna1	Zm00001eb020850_T001	0.981448	1.89	0.519285	Purifying selection
AsGRAS22	Pepsico1_Contig17925.mrna1	Zm00001eb186770_T003	0.969791	1.70564	0.568579	Purifying selection
AsGRAS22	Pepsico1_Contig17925.mrna1	Zm00001eb429450_T001	0.901546	2.34056	0.385184	Purifying selection
AsGRAS22	Pepsico1_Contig17925.mrna1	Zm00001eb326550_T001	0.871364	1.40881	0.618511	Purifying selection
AsGRAS22	Pepsico1_Contig17925.mrna1	Zm00001eb029390_T001	0.862124	1.7728	0.486306	Purifying selection
AsGRAS22	Pepsico1_Contig17925.mrna1	Zm00001eb002990_T001	1.04616	1.48484	0.704559	Purifying selection
AsGRAS22	Pepsico1_Contig17925.mrna1	Zm00001eb291030_T001	0.891091	1.83882	0.484601	Purifying selection
AsGRAS22	Pepsico1_Contig17925.mrna1	Zm00001eb067940_T001	0.883219	2.19464	0.402444	Purifying selection
AsGRAS22	Pepsico1_Contig17925.mrna1	Zm00001eb023010_T001	0.838383	1.86213	0.450228	Purifying selection
AsGRAS22	Pepsico1_Contig17925.mrna1	Zm00001eb422620_T001	0.489612	1.77354	0.276065	Purifying selection
AsGRAS23	Pepsico2_Contig10379.mrna3	Zm00001eb399000_T001	1.07748	2.41989	0.445261	Purifying selection
AsGRAS23	Pepsico2_Contig10379.mrna3	Zm00001eb268460_T001	0.797035	1.63149	0.48853	Purifying selection
AsGRAS23	Pepsico2_Contig10379.mrna3	Zm00001eb301410_T001	0.894071	3.18177	0.280999	Purifying selection
AsGRAS23	Pepsico2_Contig10379.mrna3	Zm00001eb164480_T001	0.850999	3.20651	0.265397	Purifying selection
AsGRAS23	Pepsico2_Contig10379.mrna3	Zm00001eb164480_T002	0.850999	3.20651	0.265397	Purifying selection
AsGRAS23	Pepsico2_Contig10379.mrna3	Zm00001eb325750_T001	0.483803	3.0644	0.157878	Purifying selection
AsGRAS23	Pepsico2_Contig10379.mrna3	Zm00001eb325750_T003	0.483803	3.0644	0.157878	Purifying selection
AsGRAS23	Pepsico2_Contig10379.mrna3	Zm00001eb049620_T001	0.963379	1.18581	0.812425	Purifying selection
AsGRAS23	Pepsico2_Contig10379.mrna3	Zm00001eb325750_T002	0.483803	3.0644	0.157878	Purifying selection
AsGRAS23	Pepsico2_Contig10379.mrna3	Zm00001eb133730_T001	1.01904	2.22454	0.458092	Purifying selection
AsGRAS23	Pepsico2_Contig10379.mrna3	Zm00001eb136350_T001	0.847408	3.04419	0.278369	Purifying selection
AsGRAS23	Pepsico2_Contig10379.mrna3	Zm00001eb108090_T001	0.963837	2.74431	0.351213	Purifying selection
AsGRAS23	Pepsico2_Contig10379.mrna3	Zm00001eb378590_T001	0.932271	4.59645	0.202824	Purifying selection
AsGRAS23	Pepsico2_Contig10379.mrna3	Zm00001eb054480_T001	0.779874	2.41303	0.323193	Purifying selection
AsGRAS23	Pepsico2_Contig10379.mrna3	Zm00001eb378590_T002	0.932271	4.59645	0.202824	Purifying selection
AsGRAS23	Pepsico2_Contig10379.mrna3	Zm00001eb054480_T002	0.77869	2.33762	0.333112	Purifying selection
AsGRAS23	Pepsico2_Contig10379.mrna3	Zm00001eb285410_T001	0.76445	2.76115	0.276859	Purifying selection
AsGRAS23	Pepsico2_Contig10379.mrna3	Zm00001eb291930_T001	0.845623	1.88244	0.449217	Purifying selection
AsGRAS23	Pepsico2_Contig10379.mrna3	Zm00001eb170110_T001	0.765803	3.07649	0.248921	Purifying selection
AsGRAS23	Pepsico2_Contig10379.mrna3	Zm00001eb164530_T001	0.89522	5.2804	0.169536	Purifying selection
AsGRAS23	Pepsico2_Contig10379.mrna3	Zm00001eb139470_T001	0.88438	3.40498	0.259731	Purifying selection
AsGRAS23	Pepsico2_Contig10379.mrna3	Zm00001eb301400_T001	1.10054	2.28339	0.481976	Purifying selection
AsGRAS23	Pepsico2_Contig10379.mrna3	Zm00001eb148290_T002	0.872033	2.53058	0.344598	Purifying selection
AsGRAS23	Pepsico2_Contig10379.mrna3	Zm00001eb148290_T001	0.872033	2.53058	0.344598	Purifying selection
AsGRAS23	Pepsico2_Contig10379.mrna3	Zm00001eb164350_T001	0.887945	2.91623	0.304484	Purifying selection
AsGRAS23	Pepsico2_Contig10379.mrna3	Zm00001eb236120_T001	0.817183	2.03894	0.400788	Purifying selection
AsGRAS23	Pepsico2_Contig10379.mrna3	Zm00001eb405090_T001	0.76746	1.69697	0.452253	Purifying selection
AsGRAS23	Pepsico2_Contig10379.mrna3	Zm00001eb164470_T001	0.910666	2.77814	0.327798	Purifying selection
AsGRAS23	Pepsico2_Contig10379.mrna3	Zm00001eb388460_T001	0.819585	2.52981	0.32397	Purifying selection
AsGRAS23	Pepsico2_Contig10379.mrna3	Zm00001eb196420_T001	0.745665	1.511	0.493491	Purifying selection
AsGRAS23	Pepsico2_Contig10379.mrna3	Zm00001eb355860_T001	0.904831	2.08106	0.434794	Purifying selection
AsGRAS23	Pepsico2_Contig10379.mrna3	Zm00001eb136140_T001	0.971912	1.89078	0.514027	Purifying selection
AsGRAS23	Pepsico2_Contig10379.mrna3	Zm00001eb112130_T001	0.87355	3.1081	0.281056	Purifying selection
AsGRAS23	Pepsico2_Contig10379.mrna3	Zm00001eb067930_T001	1.01987	1.82521	0.558769	Purifying selection
AsGRAS23	Pepsico2_Contig10379.mrna3	Zm00001eb266930_T001	0.884483	2.21868	0.398652	Purifying selection
AsGRAS23	Pepsico2_Contig10379.mrna3	Zm00001eb266930_T002	0.954797	2.24243	0.425787	Purifying selection
AsGRAS23	Pepsico2_Contig10379.mrna3	Zm00001eb073130_T001	0.797382	3.15984	0.252349	Purifying selection
AsGRAS23	Pepsico2_Contig10379.mrna3	Zm00001eb115950_T001	0.919892	2.61168	0.352222	Purifying selection
AsGRAS23	Pepsico2_Contig10379.mrna3	Zm00001eb082700_T001	0.788595	2.08852	0.377586	Purifying selection
AsGRAS23	Pepsico2_Contig10379.mrna3	Zm00001eb107910_T002	0.466806	2.25731	0.206798	Purifying selection
AsGRAS23	Pepsico2_Contig10379.mrna3	Zm00001eb107910_T001	0.466806	2.25731	0.206798	Purifying selection
AsGRAS23	Pepsico2_Contig10379.mrna3	Zm00001eb326210_T001	0.796791	3.4109	0.233601	Purifying selection
AsGRAS23	Pepsico2_Contig10379.mrna3	Zm00001eb216610_T001	0.786279	2.92441	0.268867	Purifying selection
AsGRAS23	Pepsico2_Contig10379.mrna3	Zm00001eb428430_T001	0.905508	4.64109	0.195107	Purifying selection
AsGRAS23	Pepsico2_Contig10379.mrna3	Zm00001eb249840_T002	0.9151	2.95785	0.30938	Purifying selection
AsGRAS23	Pepsico2_Contig10379.mrna3	Zm00001eb106490_T001	0.0690803	0.720547	0.095872	Purifying selection
AsGRAS23	Pepsico2_Contig10379.mrna3	Zm00001eb081760_T001	1.01873	2.51184	0.405572	Purifying selection
AsGRAS23	Pepsico2_Contig10379.mrna3	Zm00001eb326020_T001	0.944392	3.219	0.293381	Purifying selection
AsGRAS23	Pepsico2_Contig10379.mrna3	Zm00001eb186770_T001	0.887554	3.78141	0.234715	Purifying selection
AsGRAS23	Pepsico2_Contig10379.mrna3	Zm00001eb020850_T001	0.895604	3.11932	0.287115	Purifying selection
AsGRAS23	Pepsico2_Contig10379.mrna3	Zm00001eb186770_T003	0.871876	2.60182	0.335102	Purifying selection
AsGRAS23	Pepsico2_Contig10379.mrna3	Zm00001eb029390_T001	0.876021	2.53555	0.345495	Purifying selection
AsGRAS23	Pepsico2_Contig10379.mrna3	Zm00001eb002990_T001	0.738795	3.22334	0.229202	Purifying selection
AsGRAS23	Pepsico2_Contig10379.mrna3	Zm00001eb023010_T001	0.925591	3.81552	0.242586	Purifying selection
AsGRAS23	Pepsico2_Contig10379.mrna3	Zm00001eb422620_T001	0.862419	1.82906	0.471509	Purifying selection
AsGRAS24	Pepsico1_Contig36247.mrna1	Zm00001eb399000_T001	0.999397	1.79504	0.556754	Purifying selection
AsGRAS24	Pepsico1_Contig36247.mrna1	Zm00001eb268460_T001	1.09218	1.44922	0.753632	Purifying selection
AsGRAS24	Pepsico1_Contig36247.mrna1	Zm00001eb301410_T001	0.904393	1.18689	0.761984	Purifying selection
AsGRAS24	Pepsico1_Contig36247.mrna1	Zm00001eb164500_T001	0.976926	1.98879	0.491216	Purifying selection
AsGRAS24	Pepsico1_Contig36247.mrna1	Zm00001eb164480_T001	0.837983	1.71947	0.48735	Purifying selection
AsGRAS24	Pepsico1_Contig36247.mrna1	Zm00001eb164480_T002	0.837983	1.71947	0.48735	Purifying selection
AsGRAS24	Pepsico1_Contig36247.mrna1	Zm00001eb011560_T001	0.825389	1.62874	0.506765	Purifying selection
AsGRAS24	Pepsico1_Contig36247.mrna1	Zm00001eb202270_T001	0.894101	2.62987	0.33998	Purifying selection
AsGRAS24	Pepsico1_Contig36247.mrna1	Zm00001eb055700_T001	0.883582	2.33884	0.377787	Purifying selection
AsGRAS24	Pepsico1_Contig36247.mrna1	Zm00001eb325750_T001	0.213763	0.89413	0.239074	Purifying selection
AsGRAS24	Pepsico1_Contig36247.mrna1	Zm00001eb325750_T003	0.213763	0.89413	0.239074	Purifying selection
AsGRAS24	Pepsico1_Contig36247.mrna1	Zm00001eb049620_T001	0.93386	1.84956	0.504911	Purifying selection
AsGRAS24	Pepsico1_Contig36247.mrna1	Zm00001eb325750_T002	0.213763	0.89413	0.239074	Purifying selection
AsGRAS24	Pepsico1_Contig36247.mrna1	Zm00001eb215870_T001	0.93734	1.99382	0.470122	Purifying selection
AsGRAS24	Pepsico1_Contig36247.mrna1	Zm00001eb196430_T001	0.879711	1.5707	0.560075	Purifying selection
AsGRAS24	Pepsico1_Contig36247.mrna1	Zm00001eb133730_T001	1.22334	2.13258	0.573645	Purifying selection
AsGRAS24	Pepsico1_Contig36247.mrna1	Zm00001eb019640_T001	1.03989	2.17082	0.47903	Purifying selection
AsGRAS24	Pepsico1_Contig36247.mrna1	Zm00001eb158520_T001	0.976133	1.76812	0.552074	Purifying selection
AsGRAS24	Pepsico1_Contig36247.mrna1	Zm00001eb266920_T001	1.02886	1.52516	0.674591	Purifying selection
AsGRAS24	Pepsico1_Contig36247.mrna1	Zm00001eb195650_T001	1.09171	1.49321	0.731118	Purifying selection
AsGRAS24	Pepsico1_Contig36247.mrna1	Zm00001eb308090_T001	0.929638	1.91926	0.484373	Purifying selection
AsGRAS24	Pepsico1_Contig36247.mrna1	Zm00001eb136350_T001	0.920662	1.94999	0.472137	Purifying selection
AsGRAS24	Pepsico1_Contig36247.mrna1	Zm00001eb401210_T001	0.422124	1.80966	0.233262	Purifying selection
AsGRAS24	Pepsico1_Contig36247.mrna1	Zm00001eb136150_T001	1.09331	2.96137	0.36919	Purifying selection
AsGRAS24	Pepsico1_Contig36247.mrna1	Zm00001eb108090_T001	0.976373	1.64637	0.593045	Purifying selection
AsGRAS24	Pepsico1_Contig36247.mrna1	Zm00001eb379340_T001	1.31397	1.64641	0.798083	Purifying selection
AsGRAS24	Pepsico1_Contig36247.mrna1	Zm00001eb378590_T001	1.06104	1.74642	0.607549	Purifying selection
AsGRAS24	Pepsico1_Contig36247.mrna1	Zm00001eb054480_T001	0.886851	1.40948	0.629206	Purifying selection
AsGRAS24	Pepsico1_Contig36247.mrna1	Zm00001eb378590_T002	1.06104	1.74642	0.607549	Purifying selection
AsGRAS24	Pepsico1_Contig36247.mrna1	Zm00001eb054480_T002	0.893979	1.4185	0.630227	Purifying selection
AsGRAS24	Pepsico1_Contig36247.mrna1	Zm00001eb405080_T001	1.04352	1.37166	0.760775	Purifying selection
AsGRAS24	Pepsico1_Contig36247.mrna1	Zm00001eb285410_T001	1.11892	2.21589	0.504954	Purifying selection
AsGRAS24	Pepsico1_Contig36247.mrna1	Zm00001eb291930_T001	0.976722	2.32077	0.420861	Purifying selection
AsGRAS24	Pepsico1_Contig36247.mrna1	Zm00001eb000470_T001	1.00853	1.95923	0.514759	Purifying selection
AsGRAS24	Pepsico1_Contig36247.mrna1	Zm00001eb108250_T001	0.890358	1.57557	0.565101	Purifying selection
AsGRAS24	Pepsico1_Contig36247.mrna1	Zm00001eb108250_T002	0.890358	1.57557	0.565101	Purifying selection
AsGRAS24	Pepsico1_Contig36247.mrna1	Zm00001eb170110_T001	0.974197	1.92992	0.504786	Purifying selection
AsGRAS24	Pepsico1_Contig36247.mrna1	Zm00001eb164530_T001	0.954816	2.35852	0.404837	Purifying selection
AsGRAS24	Pepsico1_Contig36247.mrna1	Zm00001eb139470_T001	0.991625	2.32558	0.426399	Purifying selection
AsGRAS24	Pepsico1_Contig36247.mrna1	Zm00001eb392980_T001	0.967868	2.17766	0.444454	Purifying selection
AsGRAS24	Pepsico1_Contig36247.mrna1	Zm00001eb301400_T001	0.98405	1.86766	0.52689	Purifying selection
AsGRAS24	Pepsico1_Contig36247.mrna1	Zm00001eb148290_T002	0.959287	3.42001	0.280493	Purifying selection
AsGRAS24	Pepsico1_Contig36247.mrna1	Zm00001eb148290_T001	0.959287	3.42001	0.280493	Purifying selection
AsGRAS24	Pepsico1_Contig36247.mrna1	Zm00001eb164350_T001	1.00612	1.59624	0.630309	Purifying selection
AsGRAS24	Pepsico1_Contig36247.mrna1	Zm00001eb236120_T001	1.30951	2.19951	0.595366	Purifying selection
AsGRAS24	Pepsico1_Contig36247.mrna1	Zm00001eb405090_T001	0.940555	2.01282	0.467282	Purifying selection
AsGRAS24	Pepsico1_Contig36247.mrna1	Zm00001eb164470_T001	0.888424	1.90994	0.465158	Purifying selection
AsGRAS24	Pepsico1_Contig36247.mrna1	Zm00001eb187310_T001	1.08053	1.96555	0.549733	Purifying selection
AsGRAS24	Pepsico1_Contig36247.mrna1	Zm00001eb388460_T001	1.12277	2.36666	0.474411	Purifying selection
AsGRAS24	Pepsico1_Contig36247.mrna1	Zm00001eb027720_T001	0.5451	1.77236	0.307556	Purifying selection
AsGRAS24	Pepsico1_Contig36247.mrna1	Zm00001eb027720_T002	0.5451	1.77236	0.307556	Purifying selection
AsGRAS24	Pepsico1_Contig36247.mrna1	Zm00001eb196420_T001	0.963437	1.05736	0.911176	Purifying selection
AsGRAS24	Pepsico1_Contig36247.mrna1	Zm00001eb355860_T001	1.00563	3.16074	0.318163	Purifying selection
AsGRAS24	Pepsico1_Contig36247.mrna1	Zm00001eb136140_T001	0.918448	1.55574	0.590359	Purifying selection
AsGRAS24	Pepsico1_Contig36247.mrna1	Zm00001eb112130_T001	1.19665	2.49586	0.479455	Purifying selection
AsGRAS24	Pepsico1_Contig36247.mrna1	Zm00001eb093670_T002	1.15894	1.62993	0.711034	Purifying selection
AsGRAS24	Pepsico1_Contig36247.mrna1	Zm00001eb093670_T001	1.15894	1.62993	0.711034	Purifying selection
AsGRAS24	Pepsico1_Contig36247.mrna1	Zm00001eb067930_T001	1.22952	2.11066	0.582531	Purifying selection
AsGRAS24	Pepsico1_Contig36247.mrna1	Zm00001eb363140_T001	1.19432	2.22461	0.536867	Purifying selection
AsGRAS24	Pepsico1_Contig36247.mrna1	Zm00001eb324600_T001	1.01331	1.42478	0.711206	Purifying selection
AsGRAS24	Pepsico1_Contig36247.mrna1	Zm00001eb073130_T001	1.11062	1.64792	0.673953	Purifying selection
AsGRAS24	Pepsico1_Contig36247.mrna1	Zm00001eb115950_T001	1.02366	1.48399	0.689804	Purifying selection
AsGRAS24	Pepsico1_Contig36247.mrna1	Zm00001eb398990_T001	1.00163	1.22784	0.815767	Purifying selection
AsGRAS24	Pepsico1_Contig36247.mrna1	Zm00001eb107910_T002	0.17846	0.800014	0.223071	Purifying selection
AsGRAS24	Pepsico1_Contig36247.mrna1	Zm00001eb107910_T001	0.17846	0.800014	0.223071	Purifying selection
AsGRAS24	Pepsico1_Contig36247.mrna1	Zm00001eb141310_T001	1.17946	1.86712	0.6317	Purifying selection
AsGRAS24	Pepsico1_Contig36247.mrna1	Zm00001eb326210_T001	0.893142	1.3144	0.679504	Purifying selection
AsGRAS24	Pepsico1_Contig36247.mrna1	Zm00001eb216610_T001	0.826058	1.65823	0.498155	Purifying selection
AsGRAS24	Pepsico1_Contig36247.mrna1	Zm00001eb249840_T001	0.938759	3.22107	0.291443	Purifying selection
AsGRAS24	Pepsico1_Contig36247.mrna1	Zm00001eb428430_T001	1.02866	1.74734	0.588699	Purifying selection
AsGRAS24	Pepsico1_Contig36247.mrna1	Zm00001eb249840_T002	0.938759	3.22107	0.291443	Purifying selection
AsGRAS24	Pepsico1_Contig36247.mrna1	Zm00001eb081760_T001	1.00855	2.23536	0.451181	Purifying selection
AsGRAS24	Pepsico1_Contig36247.mrna1	Zm00001eb405110_T001	1.10308	1.36352	0.808994	Purifying selection
AsGRAS24	Pepsico1_Contig36247.mrna1	Zm00001eb164490_T001	0.998231	2.57549	0.387589	Purifying selection
AsGRAS24	Pepsico1_Contig36247.mrna1	Zm00001eb074460_T001	0.783589	2.42005	0.323791	Purifying selection
AsGRAS24	Pepsico1_Contig36247.mrna1	Zm00001eb186770_T002	1.01048	2.67106	0.378307	Purifying selection
AsGRAS24	Pepsico1_Contig36247.mrna1	Zm00001eb326020_T001	0.98805	4.19502	0.235529	Purifying selection
AsGRAS24	Pepsico1_Contig36247.mrna1	Zm00001eb186770_T001	1.01048	2.67106	0.378307	Purifying selection
AsGRAS24	Pepsico1_Contig36247.mrna1	Zm00001eb020850_T001	1.02473	2.24836	0.455769	Purifying selection
AsGRAS24	Pepsico1_Contig36247.mrna1	Zm00001eb186770_T003	1.01048	2.67106	0.378307	Purifying selection
AsGRAS24	Pepsico1_Contig36247.mrna1	Zm00001eb429450_T001	0.940147	2.12732	0.441939	Purifying selection
AsGRAS24	Pepsico1_Contig36247.mrna1	Zm00001eb326550_T001	0.986033	1.30236	0.757115	Purifying selection
AsGRAS24	Pepsico1_Contig36247.mrna1	Zm00001eb029390_T001	0.897162	1.93307	0.464112	Purifying selection
AsGRAS24	Pepsico1_Contig36247.mrna1	Zm00001eb002990_T001	0.883991	1.97929	0.44662	Purifying selection
AsGRAS24	Pepsico1_Contig36247.mrna1	Zm00001eb291030_T001	1.04134	2.61386	0.398391	Purifying selection
AsGRAS24	Pepsico1_Contig36247.mrna1	Zm00001eb067940_T001	0.883219	2.19464	0.402444	Purifying selection
AsGRAS24	Pepsico1_Contig36247.mrna1	Zm00001eb023010_T001	0.83988	2.32611	0.361066	Purifying selection
AsGRAS24	Pepsico1_Contig36247.mrna1	Zm00001eb422620_T001	1.07641	1.97657	0.544583	Purifying selection
AsGRAS25	Pepsico1_Contig17438.mrna1	Zm00001eb399000_T001	0.903405	1.14554	0.788624	Purifying selection
AsGRAS25	Pepsico1_Contig17438.mrna1	Zm00001eb268460_T001	0.721997	0.849824	0.849584	Purifying selection
AsGRAS25	Pepsico1_Contig17438.mrna1	Zm00001eb301410_T001	0.971032	0.898319	1.08094	Purifying selection
AsGRAS25	Pepsico1_Contig17438.mrna1	Zm00001eb164500_T001	0.914375	1.07258	0.852498	Purifying selection
AsGRAS25	Pepsico1_Contig17438.mrna1	Zm00001eb164480_T001	0.841291	1.06565	0.789466	Purifying selection
AsGRAS25	Pepsico1_Contig17438.mrna1	Zm00001eb164480_T002	0.841291	1.06565	0.789466	Purifying selection
AsGRAS25	Pepsico1_Contig17438.mrna1	Zm00001eb011560_T001	0.853621	1.14488	0.745596	Purifying selection
AsGRAS25	Pepsico1_Contig17438.mrna1	Zm00001eb202270_T001	0.951681	2.15945	0.440705	Purifying selection
AsGRAS25	Pepsico1_Contig17438.mrna1	Zm00001eb055700_T001	0.760009	1.42957	0.531633	Purifying selection
AsGRAS25	Pepsico1_Contig17438.mrna1	Zm00001eb325750_T001	0.761738	1.07386	0.709344	Purifying selection
AsGRAS25	Pepsico1_Contig17438.mrna1	Zm00001eb325750_T003	0.761738	1.07386	0.709344	Purifying selection
AsGRAS25	Pepsico1_Contig17438.mrna1	Zm00001eb049620_T001	0.934114	1.17752	0.793291	Purifying selection
AsGRAS25	Pepsico1_Contig17438.mrna1	Zm00001eb325750_T002	0.761738	1.07386	0.709344	Purifying selection
AsGRAS25	Pepsico1_Contig17438.mrna1	Zm00001eb215870_T001	0.75176	1.27813	0.588174	Purifying selection
AsGRAS25	Pepsico1_Contig17438.mrna1	Zm00001eb196430_T001	0.781803	1.08718	0.719108	Purifying selection
AsGRAS25	Pepsico1_Contig17438.mrna1	Zm00001eb019640_T001	0.830587	1.05807	0.785004	Purifying selection
AsGRAS25	Pepsico1_Contig17438.mrna1	Zm00001eb158520_T001	0.750621	1.11737	0.671777	Purifying selection
AsGRAS25	Pepsico1_Contig17438.mrna1	Zm00001eb195650_T001	0.809874	0.951801	0.850886	Purifying selection
AsGRAS25	Pepsico1_Contig17438.mrna1	Zm00001eb308090_T001	0.803316	1.10229	0.72877	Purifying selection
AsGRAS25	Pepsico1_Contig17438.mrna1	Zm00001eb136350_T001	0.903168	1.29628	0.696737	Purifying selection
AsGRAS25	Pepsico1_Contig17438.mrna1	Zm00001eb136150_T001	0.948344	1.36705	0.693718	Purifying selection
AsGRAS25	Pepsico1_Contig17438.mrna1	Zm00001eb108090_T001	0.933495	1.29623	0.720162	Purifying selection
AsGRAS25	Pepsico1_Contig17438.mrna1	Zm00001eb379340_T001	0.815636	0.878277	0.928678	Purifying selection
AsGRAS25	Pepsico1_Contig17438.mrna1	Zm00001eb378590_T001	0.814931	0.963346	0.845938	Purifying selection
AsGRAS25	Pepsico1_Contig17438.mrna1	Zm00001eb054480_T001	0.770719	1.06084	0.726514	Purifying selection
AsGRAS25	Pepsico1_Contig17438.mrna1	Zm00001eb378590_T002	0.814931	0.963346	0.845938	Purifying selection
AsGRAS25	Pepsico1_Contig17438.mrna1	Zm00001eb054480_T002	0.795367	1.12754	0.705398	Purifying selection
AsGRAS25	Pepsico1_Contig17438.mrna1	Zm00001eb405080_T001	0.941813	0.983959	0.957167	Purifying selection
AsGRAS25	Pepsico1_Contig17438.mrna1	Zm00001eb285410_T001	0.865567	1.13704	0.761245	Purifying selection
AsGRAS25	Pepsico1_Contig17438.mrna1	Zm00001eb291930_T001	0.853745	0.962809	0.886724	Purifying selection
AsGRAS25	Pepsico1_Contig17438.mrna1	Zm00001eb000470_T001	0.753195	1.14977	0.655083	Purifying selection
AsGRAS25	Pepsico1_Contig17438.mrna1	Zm00001eb108250_T001	0.831396	0.845775	0.983	Purifying selection
AsGRAS25	Pepsico1_Contig17438.mrna1	Zm00001eb108250_T002	0.831396	0.845775	0.983	Purifying selection
AsGRAS25	Pepsico1_Contig17438.mrna1	Zm00001eb355870_T001	0.774296	4.48036	0.17282	Purifying selection
AsGRAS25	Pepsico1_Contig17438.mrna1	Zm00001eb170110_T001	0.83483	0.955307	0.873887	Purifying selection
AsGRAS25	Pepsico1_Contig17438.mrna1	Zm00001eb164530_T001	0.864184	1.9182	0.450518	Purifying selection
AsGRAS25	Pepsico1_Contig17438.mrna1	Zm00001eb164530_T002	0.932468	1.87815	0.496481	Purifying selection
AsGRAS25	Pepsico1_Contig17438.mrna1	Zm00001eb139470_T001	0.860292	1.28173	0.671198	Purifying selection
AsGRAS25	Pepsico1_Contig17438.mrna1	Zm00001eb392980_T001	0.916885	1.07928	0.849533	Purifying selection
AsGRAS25	Pepsico1_Contig17438.mrna1	Zm00001eb301400_T001	0.898059	1.32081	0.679931	Purifying selection
AsGRAS25	Pepsico1_Contig17438.mrna1	Zm00001eb148290_T002	0.922414	2.25405	0.409225	Purifying selection
AsGRAS25	Pepsico1_Contig17438.mrna1	Zm00001eb148290_T001	0.922414	2.25405	0.409225	Purifying selection
AsGRAS25	Pepsico1_Contig17438.mrna1	Zm00001eb164350_T001	0.912988	1.13386	0.805201	Purifying selection
AsGRAS25	Pepsico1_Contig17438.mrna1	Zm00001eb236120_T001	0.838028	1.11564	0.751165	Purifying selection
AsGRAS25	Pepsico1_Contig17438.mrna1	Zm00001eb405090_T001	0.702867	1.03526	0.678929	Purifying selection
AsGRAS25	Pepsico1_Contig17438.mrna1	Zm00001eb164470_T001	1.00746	1.29118	0.780259	Purifying selection
AsGRAS25	Pepsico1_Contig17438.mrna1	Zm00001eb187310_T001	0.243581	0.766803	0.317658	Purifying selection
AsGRAS25	Pepsico1_Contig17438.mrna1	Zm00001eb388460_T001	0.821296	1.04472	0.786139	Purifying selection
AsGRAS25	Pepsico1_Contig17438.mrna1	Zm00001eb196420_T001	0.784675	1.0701	0.733274	Purifying selection
AsGRAS25	Pepsico1_Contig17438.mrna1	Zm00001eb136140_T001	0.65513	1.34071	0.488643	Purifying selection
AsGRAS25	Pepsico1_Contig17438.mrna1	Zm00001eb112130_T001	1.01139	2.32293	0.435395	Purifying selection
AsGRAS25	Pepsico1_Contig17438.mrna1	Zm00001eb093670_T002	0.901851	0.991597	0.909494	Purifying selection
AsGRAS25	Pepsico1_Contig17438.mrna1	Zm00001eb093670_T001	0.812735	0.941596	0.863145	Purifying selection
AsGRAS25	Pepsico1_Contig17438.mrna1	Zm00001eb067930_T001	0.986062	1.29443	0.761775	Purifying selection
AsGRAS25	Pepsico1_Contig17438.mrna1	Zm00001eb363140_T001	0.776659	0.800382	0.97036	Purifying selection
AsGRAS25	Pepsico1_Contig17438.mrna1	Zm00001eb324600_T001	0.860825	0.930394	0.925226	Purifying selection
AsGRAS25	Pepsico1_Contig17438.mrna1	Zm00001eb073130_T001	0.148356	0.609943	0.24323	Purifying selection
AsGRAS25	Pepsico1_Contig17438.mrna1	Zm00001eb115950_T001	0.940107	1.13635	0.827308	Purifying selection
AsGRAS25	Pepsico1_Contig17438.mrna1	Zm00001eb398990_T001	0.933224	0.947412	0.985024	Purifying selection
AsGRAS25	Pepsico1_Contig17438.mrna1	Zm00001eb082700_T001	0.804066	1.24219	0.647295	Purifying selection
AsGRAS25	Pepsico1_Contig17438.mrna1	Zm00001eb107910_T002	0.772232	1.20422	0.641273	Purifying selection
AsGRAS25	Pepsico1_Contig17438.mrna1	Zm00001eb107910_T001	0.772232	1.20422	0.641273	Purifying selection
AsGRAS25	Pepsico1_Contig17438.mrna1	Zm00001eb141310_T001	0.762211	0.771797	0.98758	Purifying selection
AsGRAS25	Pepsico1_Contig17438.mrna1	Zm00001eb326210_T001	0.840961	0.865549	0.971594	Purifying selection
AsGRAS25	Pepsico1_Contig17438.mrna1	Zm00001eb216610_T001	0.740551	0.886673	0.835202	Purifying selection
AsGRAS25	Pepsico1_Contig17438.mrna1	Zm00001eb249840_T001	0.848972	2.00923	0.422535	Purifying selection
AsGRAS25	Pepsico1_Contig17438.mrna1	Zm00001eb428430_T001	0.148453	0.599514	0.247623	Purifying selection
AsGRAS25	Pepsico1_Contig17438.mrna1	Zm00001eb249840_T002	0.787942	2.57698	0.305761	Purifying selection
AsGRAS25	Pepsico1_Contig17438.mrna1	Zm00001eb106490_T001	0.816681	2.43389	0.335545	Purifying selection
AsGRAS25	Pepsico1_Contig17438.mrna1	Zm00001eb081760_T001	0.901584	1.09781	0.82126	Purifying selection
AsGRAS25	Pepsico1_Contig17438.mrna1	Zm00001eb405110_T001	0.728497	0.810497	0.898827	Purifying selection
AsGRAS25	Pepsico1_Contig17438.mrna1	Zm00001eb164490_T001	0.893576	1.1505	0.776683	Purifying selection
AsGRAS25	Pepsico1_Contig17438.mrna1	Zm00001eb074460_T001	0.835174	1.51287	0.552044	Purifying selection
AsGRAS25	Pepsico1_Contig17438.mrna1	Zm00001eb186770_T002	0.850733	1.29227	0.658324	Purifying selection
AsGRAS25	Pepsico1_Contig17438.mrna1	Zm00001eb327300_T001	1.04386	1.66103	0.628438	Purifying selection
AsGRAS25	Pepsico1_Contig17438.mrna1	Zm00001eb326020_T001	0.891639	1.10132	0.809609	Purifying selection
AsGRAS25	Pepsico1_Contig17438.mrna1	Zm00001eb186770_T001	0.767833	1.4451	0.531337	Purifying selection
AsGRAS25	Pepsico1_Contig17438.mrna1	Zm00001eb020850_T001	0.888704	0.967479	0.918578	Purifying selection
AsGRAS25	Pepsico1_Contig17438.mrna1	Zm00001eb186770_T003	0.798845	1.47273	0.542426	Purifying selection
AsGRAS25	Pepsico1_Contig17438.mrna1	Zm00001eb429450_T001	0.835189	1.69862	0.491686	Purifying selection
AsGRAS25	Pepsico1_Contig17438.mrna1	Zm00001eb326550_T001	0.761139	1.80224	0.422329	Purifying selection
AsGRAS25	Pepsico1_Contig17438.mrna1	Zm00001eb029390_T001	0.845701	1.22904	0.688098	Purifying selection
AsGRAS25	Pepsico1_Contig17438.mrna1	Zm00001eb344400_T001	0.804676	3.49751	0.230071	Purifying selection
AsGRAS25	Pepsico1_Contig17438.mrna1	Zm00001eb002990_T001	0.790116	1.21732	0.649063	Purifying selection
AsGRAS25	Pepsico1_Contig17438.mrna1	Zm00001eb291030_T001	0.864452	1.04029	0.830972	Purifying selection
AsGRAS25	Pepsico1_Contig17438.mrna1	Zm00001eb067940_T001	1.03398	0.774506	1.33501	Purifying selection
AsGRAS25	Pepsico1_Contig17438.mrna1	Zm00001eb023010_T001	0.84055	0.914916	0.918719	Purifying selection
AsGRAS25	Pepsico1_Contig17438.mrna1	Zm00001eb422620_T001	0.889369	1.07543	0.826988	Purifying selection
AsGRAS26	Pepsico2_Contig1385.mrna1	Zm00001eb399000_T001	1.07748	2.41989	0.445261	Purifying selection
AsGRAS26	Pepsico2_Contig1385.mrna1	Zm00001eb268460_T001	0.797035	1.63149	0.48853	Purifying selection
AsGRAS26	Pepsico2_Contig1385.mrna1	Zm00001eb301410_T001	0.894071	3.18177	0.280999	Purifying selection
AsGRAS26	Pepsico2_Contig1385.mrna1	Zm00001eb164480_T001	0.850999	3.20651	0.265397	Purifying selection
AsGRAS26	Pepsico2_Contig1385.mrna1	Zm00001eb164480_T002	0.850999	3.20651	0.265397	Purifying selection
AsGRAS26	Pepsico2_Contig1385.mrna1	Zm00001eb325750_T001	0.483803	3.0644	0.157878	Purifying selection
AsGRAS26	Pepsico2_Contig1385.mrna1	Zm00001eb325750_T003	0.483803	3.0644	0.157878	Purifying selection
AsGRAS26	Pepsico2_Contig1385.mrna1	Zm00001eb049620_T001	0.963379	1.18581	0.812425	Purifying selection
AsGRAS26	Pepsico2_Contig1385.mrna1	Zm00001eb325750_T002	0.483803	3.0644	0.157878	Purifying selection
AsGRAS26	Pepsico2_Contig1385.mrna1	Zm00001eb133730_T001	1.01904	2.22454	0.458092	Purifying selection
AsGRAS26	Pepsico2_Contig1385.mrna1	Zm00001eb136350_T001	0.847408	3.04419	0.278369	Purifying selection
AsGRAS26	Pepsico2_Contig1385.mrna1	Zm00001eb108090_T001	0.963837	2.74431	0.351213	Purifying selection
AsGRAS26	Pepsico2_Contig1385.mrna1	Zm00001eb378590_T001	0.932271	4.59645	0.202824	Purifying selection
AsGRAS26	Pepsico2_Contig1385.mrna1	Zm00001eb054480_T001	0.779874	2.41303	0.323193	Purifying selection
AsGRAS26	Pepsico2_Contig1385.mrna1	Zm00001eb378590_T002	0.932271	4.59645	0.202824	Purifying selection
AsGRAS26	Pepsico2_Contig1385.mrna1	Zm00001eb054480_T002	0.77869	2.33762	0.333112	Purifying selection
AsGRAS26	Pepsico2_Contig1385.mrna1	Zm00001eb285410_T001	0.76445	2.76115	0.276859	Purifying selection
AsGRAS26	Pepsico2_Contig1385.mrna1	Zm00001eb291930_T001	0.845623	1.88244	0.449217	Purifying selection
AsGRAS26	Pepsico2_Contig1385.mrna1	Zm00001eb170110_T001	0.765803	3.07649	0.248921	Purifying selection
AsGRAS26	Pepsico2_Contig1385.mrna1	Zm00001eb164530_T001	0.89522	5.2804	0.169536	Purifying selection
AsGRAS26	Pepsico2_Contig1385.mrna1	Zm00001eb139470_T001	0.88438	3.40498	0.259731	Purifying selection
AsGRAS26	Pepsico2_Contig1385.mrna1	Zm00001eb301400_T001	1.10054	2.28339	0.481976	Purifying selection
AsGRAS26	Pepsico2_Contig1385.mrna1	Zm00001eb148290_T002	0.872033	2.53058	0.344598	Purifying selection
AsGRAS26	Pepsico2_Contig1385.mrna1	Zm00001eb148290_T001	0.872033	2.53058	0.344598	Purifying selection
AsGRAS26	Pepsico2_Contig1385.mrna1	Zm00001eb164350_T001	0.887945	2.91623	0.304484	Purifying selection
AsGRAS26	Pepsico2_Contig1385.mrna1	Zm00001eb236120_T001	0.817183	2.03894	0.400788	Purifying selection
AsGRAS26	Pepsico2_Contig1385.mrna1	Zm00001eb405090_T001	0.76746	1.69697	0.452253	Purifying selection
AsGRAS26	Pepsico2_Contig1385.mrna1	Zm00001eb164470_T001	0.910666	2.77814	0.327798	Purifying selection
AsGRAS26	Pepsico2_Contig1385.mrna1	Zm00001eb388460_T001	0.819585	2.52981	0.32397	Purifying selection
AsGRAS26	Pepsico2_Contig1385.mrna1	Zm00001eb196420_T001	0.745665	1.511	0.493491	Purifying selection
AsGRAS26	Pepsico2_Contig1385.mrna1	Zm00001eb355860_T001	0.904831	2.08106	0.434794	Purifying selection
AsGRAS26	Pepsico2_Contig1385.mrna1	Zm00001eb136140_T001	0.971912	1.89078	0.514027	Purifying selection
AsGRAS26	Pepsico2_Contig1385.mrna1	Zm00001eb112130_T001	0.87355	3.1081	0.281056	Purifying selection
AsGRAS26	Pepsico2_Contig1385.mrna1	Zm00001eb067930_T001	1.01987	1.82521	0.558769	Purifying selection
AsGRAS26	Pepsico2_Contig1385.mrna1	Zm00001eb266930_T001	0.884483	2.21868	0.398652	Purifying selection
AsGRAS26	Pepsico2_Contig1385.mrna1	Zm00001eb266930_T002	0.954797	2.24243	0.425787	Purifying selection
AsGRAS26	Pepsico2_Contig1385.mrna1	Zm00001eb073130_T001	0.797382	3.15984	0.252349	Purifying selection
AsGRAS26	Pepsico2_Contig1385.mrna1	Zm00001eb115950_T001	0.919892	2.61168	0.352222	Purifying selection
AsGRAS26	Pepsico2_Contig1385.mrna1	Zm00001eb082700_T001	0.788595	2.08852	0.377586	Purifying selection
AsGRAS26	Pepsico2_Contig1385.mrna1	Zm00001eb107910_T002	0.466806	2.25731	0.206798	Purifying selection
AsGRAS26	Pepsico2_Contig1385.mrna1	Zm00001eb107910_T001	0.466806	2.25731	0.206798	Purifying selection
AsGRAS26	Pepsico2_Contig1385.mrna1	Zm00001eb326210_T001	0.796791	3.4109	0.233601	Purifying selection
AsGRAS26	Pepsico2_Contig1385.mrna1	Zm00001eb216610_T001	0.786279	2.92441	0.268867	Purifying selection
AsGRAS26	Pepsico2_Contig1385.mrna1	Zm00001eb428430_T001	0.905508	4.64109	0.195107	Purifying selection
AsGRAS26	Pepsico2_Contig1385.mrna1	Zm00001eb249840_T002	0.9151	2.95785	0.30938	Purifying selection
AsGRAS26	Pepsico2_Contig1385.mrna1	Zm00001eb106490_T001	0.0690803	0.720547	0.095872	Purifying selection
AsGRAS26	Pepsico2_Contig1385.mrna1	Zm00001eb081760_T001	1.01873	2.51184	0.405572	Purifying selection
AsGRAS26	Pepsico2_Contig1385.mrna1	Zm00001eb326020_T001	0.944392	3.219	0.293381	Purifying selection
AsGRAS26	Pepsico2_Contig1385.mrna1	Zm00001eb186770_T001	0.887554	3.78141	0.234715	Purifying selection
AsGRAS26	Pepsico2_Contig1385.mrna1	Zm00001eb020850_T001	0.895604	3.11932	0.287115	Purifying selection
AsGRAS26	Pepsico2_Contig1385.mrna1	Zm00001eb186770_T003	0.871876	2.60182	0.335102	Purifying selection
AsGRAS26	Pepsico2_Contig1385.mrna1	Zm00001eb029390_T001	0.876021	2.53555	0.345495	Purifying selection
AsGRAS26	Pepsico2_Contig1385.mrna1	Zm00001eb002990_T001	0.738795	3.22334	0.229202	Purifying selection
AsGRAS26	Pepsico2_Contig1385.mrna1	Zm00001eb023010_T001	0.925591	3.81552	0.242586	Purifying selection
AsGRAS26	Pepsico2_Contig1385.mrna1	Zm00001eb422620_T001	0.862419	1.82906	0.471509	Purifying selection
AsGRAS27	Pepsico2_Contig8490.mrna1	Zm00001eb399000_T001	0.763888	0.717008	1.06538	Purifying selection
AsGRAS27	Pepsico2_Contig8490.mrna1	Zm00001eb268460_T001	0.721025	0.701516	1.02781	Purifying selection
AsGRAS27	Pepsico2_Contig8490.mrna1	Zm00001eb301410_T001	0.926663	1.0407	0.890421	Purifying selection
AsGRAS27	Pepsico2_Contig8490.mrna1	Zm00001eb164500_T001	0.800162	0.764398	1.04679	Purifying selection
AsGRAS27	Pepsico2_Contig8490.mrna1	Zm00001eb164480_T001	0.728108	0.735643	0.989758	Purifying selection
AsGRAS27	Pepsico2_Contig8490.mrna1	Zm00001eb164480_T002	0.728108	0.735643	0.989758	Purifying selection
AsGRAS27	Pepsico2_Contig8490.mrna1	Zm00001eb011560_T001	0.653338	0.83398	0.783397	Purifying selection
AsGRAS27	Pepsico2_Contig8490.mrna1	Zm00001eb202270_T001	0.748018	1.76083	0.424809	Purifying selection
AsGRAS27	Pepsico2_Contig8490.mrna1	Zm00001eb055700_T001	0.686532	1.26279	0.543663	Purifying selection
AsGRAS27	Pepsico2_Contig8490.mrna1	Zm00001eb325750_T001	0.746519	0.734909	1.0158	Purifying selection
AsGRAS27	Pepsico2_Contig8490.mrna1	Zm00001eb325750_T003	0.746519	0.734909	1.0158	Purifying selection
AsGRAS27	Pepsico2_Contig8490.mrna1	Zm00001eb049620_T001	0.853595	0.98963	0.86254	Purifying selection
AsGRAS27	Pepsico2_Contig8490.mrna1	Zm00001eb325750_T002	0.746519	0.734909	1.0158	Purifying selection
AsGRAS27	Pepsico2_Contig8490.mrna1	Zm00001eb215870_T001	0.7006	1.02787	0.681602	Purifying selection
AsGRAS27	Pepsico2_Contig8490.mrna1	Zm00001eb196430_T001	0.780256	0.67982	1.14774	Purifying selection
AsGRAS27	Pepsico2_Contig8490.mrna1	Zm00001eb019640_T001	0.755403	0.745771	1.01291	Purifying selection
AsGRAS27	Pepsico2_Contig8490.mrna1	Zm00001eb158520_T001	0.595776	0.634319	0.939237	Purifying selection
AsGRAS27	Pepsico2_Contig8490.mrna1	Zm00001eb266920_T001	0.925391	2.40621	0.384584	Purifying selection
AsGRAS27	Pepsico2_Contig8490.mrna1	Zm00001eb195650_T001	0.360205	0.564841	0.637711	Purifying selection
AsGRAS27	Pepsico2_Contig8490.mrna1	Zm00001eb308090_T001	0.703509	1.07631	0.653628	Purifying selection
AsGRAS27	Pepsico2_Contig8490.mrna1	Zm00001eb136350_T001	0.781968	1.23951	0.63087	Purifying selection
AsGRAS27	Pepsico2_Contig8490.mrna1	Zm00001eb136150_T001	0.773624	0.756965	1.02201	Purifying selection
AsGRAS27	Pepsico2_Contig8490.mrna1	Zm00001eb165340_T001	0.766824	1.65284	0.463944	Purifying selection
AsGRAS27	Pepsico2_Contig8490.mrna1	Zm00001eb108090_T001	0.721302	0.878283	0.821264	Purifying selection
AsGRAS27	Pepsico2_Contig8490.mrna1	Zm00001eb379340_T001	0.711896	0.843091	0.844388	Purifying selection
AsGRAS27	Pepsico2_Contig8490.mrna1	Zm00001eb165340_T002	0.766824	1.65284	0.463944	Purifying selection
AsGRAS27	Pepsico2_Contig8490.mrna1	Zm00001eb378590_T001	0.655676	0.75647	0.866757	Purifying selection
AsGRAS27	Pepsico2_Contig8490.mrna1	Zm00001eb054480_T001	0.583498	0.701265	0.832064	Purifying selection
AsGRAS27	Pepsico2_Contig8490.mrna1	Zm00001eb378590_T002	0.655676	0.75647	0.866757	Purifying selection
AsGRAS27	Pepsico2_Contig8490.mrna1	Zm00001eb054480_T002	0.578783	0.699475	0.827454	Purifying selection
AsGRAS27	Pepsico2_Contig8490.mrna1	Zm00001eb405080_T001	0.817576	0.869154	0.940658	Purifying selection
AsGRAS27	Pepsico2_Contig8490.mrna1	Zm00001eb285410_T001	0.766529	0.726934	1.05447	Purifying selection
AsGRAS27	Pepsico2_Contig8490.mrna1	Zm00001eb291930_T001	0.792412	0.698732	1.13407	Purifying selection
AsGRAS27	Pepsico2_Contig8490.mrna1	Zm00001eb000470_T001	0.749737	0.74712	1.0035	Purifying selection
AsGRAS27	Pepsico2_Contig8490.mrna1	Zm00001eb108250_T001	0.726886	0.649523	1.11911	Purifying selection
AsGRAS27	Pepsico2_Contig8490.mrna1	Zm00001eb108250_T002	0.726886	0.649523	1.11911	Purifying selection
AsGRAS27	Pepsico2_Contig8490.mrna1	Zm00001eb170110_T001	0.564511	0.660471	0.854709	Purifying selection
AsGRAS27	Pepsico2_Contig8490.mrna1	Zm00001eb164530_T001	0.839394	1.52526	0.55033	Purifying selection
AsGRAS27	Pepsico2_Contig8490.mrna1	Zm00001eb164530_T002	0.854891	1.74889	0.488819	Purifying selection
AsGRAS27	Pepsico2_Contig8490.mrna1	Zm00001eb139470_T001	0.672734	0.971271	0.692632	Purifying selection
AsGRAS27	Pepsico2_Contig8490.mrna1	Zm00001eb392980_T001	0.84098	0.801428	1.04935	Purifying selection
AsGRAS27	Pepsico2_Contig8490.mrna1	Zm00001eb062760_T001	0.767689	2.21763	0.346176	Purifying selection
AsGRAS27	Pepsico2_Contig8490.mrna1	Zm00001eb301400_T001	0.683251	0.884664	0.772329	Purifying selection
AsGRAS27	Pepsico2_Contig8490.mrna1	Zm00001eb148290_T002	0.780082	1.70583	0.457303	Purifying selection
AsGRAS27	Pepsico2_Contig8490.mrna1	Zm00001eb148290_T001	0.780082	1.70583	0.457303	Purifying selection
AsGRAS27	Pepsico2_Contig8490.mrna1	Zm00001eb164350_T001	0.823825	0.974723	0.845189	Purifying selection
AsGRAS27	Pepsico2_Contig8490.mrna1	Zm00001eb236120_T001	0.661103	0.84314	0.784096	Purifying selection
AsGRAS27	Pepsico2_Contig8490.mrna1	Zm00001eb405090_T001	0.746518	1.18536	0.629783	Purifying selection
AsGRAS27	Pepsico2_Contig8490.mrna1	Zm00001eb164470_T001	0.821012	1.35797	0.604589	Purifying selection
AsGRAS27	Pepsico2_Contig8490.mrna1	Zm00001eb187310_T001	0.880654	0.753187	1.16924	Purifying selection
AsGRAS27	Pepsico2_Contig8490.mrna1	Zm00001eb388460_T001	0.679547	0.712697	0.953487	Purifying selection
AsGRAS27	Pepsico2_Contig8490.mrna1	Zm00001eb196420_T001	0.776488	0.72539	1.07044	Purifying selection
AsGRAS27	Pepsico2_Contig8490.mrna1	Zm00001eb136140_T001	0.98672	1.09293	0.902817	Purifying selection
AsGRAS27	Pepsico2_Contig8490.mrna1	Zm00001eb112130_T001	0.817808	1.36665	0.598402	Purifying selection
AsGRAS27	Pepsico2_Contig8490.mrna1	Zm00001eb093670_T002	0.405901	0.495234	0.819615	Purifying selection
AsGRAS27	Pepsico2_Contig8490.mrna1	Zm00001eb093670_T001	0.383033	0.52233	0.733315	Purifying selection
AsGRAS27	Pepsico2_Contig8490.mrna1	Zm00001eb067930_T001	0.886651	1.0352	0.856503	Purifying selection
AsGRAS27	Pepsico2_Contig8490.mrna1	Zm00001eb363140_T001	0.775752	0.706178	1.09852	Purifying selection
AsGRAS27	Pepsico2_Contig8490.mrna1	Zm00001eb324600_T001	0.102198	0.304356	0.335785	Purifying selection
AsGRAS27	Pepsico2_Contig8490.mrna1	Zm00001eb073130_T001	0.855538	0.825846	1.03595	Purifying selection
AsGRAS27	Pepsico2_Contig8490.mrna1	Zm00001eb115950_T001	0.847621	0.708846	1.19578	Purifying selection
AsGRAS27	Pepsico2_Contig8490.mrna1	Zm00001eb398990_T001	0.810417	0.955392	0.848256	Purifying selection
AsGRAS27	Pepsico2_Contig8490.mrna1	Zm00001eb082700_T001	0.645136	0.851373	0.75776	Purifying selection
AsGRAS27	Pepsico2_Contig8490.mrna1	Zm00001eb107910_T002	0.663924	0.836135	0.794039	Purifying selection
AsGRAS27	Pepsico2_Contig8490.mrna1	Zm00001eb107910_T001	0.663924	0.836135	0.794039	Purifying selection
AsGRAS27	Pepsico2_Contig8490.mrna1	Zm00001eb141310_T001	0.706269	0.631097	1.11911	Purifying selection
AsGRAS27	Pepsico2_Contig8490.mrna1	Zm00001eb326210_T001	0.736329	0.648111	1.13612	Purifying selection
AsGRAS27	Pepsico2_Contig8490.mrna1	Zm00001eb216610_T001	0.633454	0.616011	1.02832	Purifying selection
AsGRAS27	Pepsico2_Contig8490.mrna1	Zm00001eb249840_T001	0.829032	1.40634	0.589495	Purifying selection
AsGRAS27	Pepsico2_Contig8490.mrna1	Zm00001eb428430_T001	0.826597	0.794711	1.04012	Purifying selection
AsGRAS27	Pepsico2_Contig8490.mrna1	Zm00001eb249840_T002	0.800125	1.48048	0.54045	Purifying selection
AsGRAS27	Pepsico2_Contig8490.mrna1	Zm00001eb106490_T001	0.751822	2.02443	0.371375	Purifying selection
AsGRAS27	Pepsico2_Contig8490.mrna1	Zm00001eb081760_T001	0.814464	0.785967	1.03626	Purifying selection
AsGRAS27	Pepsico2_Contig8490.mrna1	Zm00001eb405110_T001	0.711	0.513909	1.38351	Purifying selection
AsGRAS27	Pepsico2_Contig8490.mrna1	Zm00001eb164490_T001	0.810713	0.802507	1.01022	Purifying selection
AsGRAS27	Pepsico2_Contig8490.mrna1	Zm00001eb074460_T001	0.744978	1.42759	0.521843	Purifying selection
AsGRAS27	Pepsico2_Contig8490.mrna1	Zm00001eb186770_T002	0.765618	1.27432	0.600805	Purifying selection
AsGRAS27	Pepsico2_Contig8490.mrna1	Zm00001eb327300_T001	0.640465	0.87027	0.735938	Purifying selection
AsGRAS27	Pepsico2_Contig8490.mrna1	Zm00001eb326020_T001	0.770132	0.766238	1.00508	Purifying selection
AsGRAS27	Pepsico2_Contig8490.mrna1	Zm00001eb186770_T001	0.784176	1.33994	0.585233	Purifying selection
AsGRAS27	Pepsico2_Contig8490.mrna1	Zm00001eb020850_T001	0.749667	0.773793	0.968822	Purifying selection
AsGRAS27	Pepsico2_Contig8490.mrna1	Zm00001eb186770_T003	0.770014	1.28899	0.59738	Purifying selection
AsGRAS27	Pepsico2_Contig8490.mrna1	Zm00001eb429450_T001	0.827	1.84255	0.448834	Purifying selection
AsGRAS27	Pepsico2_Contig8490.mrna1	Zm00001eb326550_T001	0.754236	1.59007	0.474341	Purifying selection
AsGRAS27	Pepsico2_Contig8490.mrna1	Zm00001eb029390_T001	0.771286	1.15689	0.666689	Purifying selection
AsGRAS27	Pepsico2_Contig8490.mrna1	Zm00001eb344400_T001	0.71247	2.69946	0.263931	Purifying selection
AsGRAS27	Pepsico2_Contig8490.mrna1	Zm00001eb002990_T001	0.691921	0.745027	0.928719	Purifying selection
AsGRAS27	Pepsico2_Contig8490.mrna1	Zm00001eb291030_T001	0.534447	0.658177	0.812012	Purifying selection
AsGRAS27	Pepsico2_Contig8490.mrna1	Zm00001eb288400_T002	0.753331	3.74125	0.201358	Purifying selection
AsGRAS27	Pepsico2_Contig8490.mrna1	Zm00001eb067940_T001	0.683087	1.33162	0.512973	Purifying selection
AsGRAS27	Pepsico2_Contig8490.mrna1	Zm00001eb288400_T001	0.753331	3.74125	0.201358	Purifying selection
AsGRAS27	Pepsico2_Contig8490.mrna1	Zm00001eb023010_T001	0.72351	0.803055	0.900947	Purifying selection
AsGRAS27	Pepsico2_Contig8490.mrna1	Zm00001eb422620_T001	0.62572	0.818123	0.764824	Purifying selection
AsGRAS28	Pepsico2_Contig1385.mrna2	Zm00001eb399000_T001	1.0363	2.02242	0.512409	Purifying selection
AsGRAS28	Pepsico2_Contig1385.mrna2	Zm00001eb268460_T001	0.801043	1.42529	0.562019	Purifying selection
AsGRAS28	Pepsico2_Contig1385.mrna2	Zm00001eb301410_T001	0.882208	2.51936	0.350171	Purifying selection
AsGRAS28	Pepsico2_Contig1385.mrna2	Zm00001eb164480_T001	0.801473	2.74866	0.291587	Purifying selection
AsGRAS28	Pepsico2_Contig1385.mrna2	Zm00001eb164480_T002	0.801473	2.74866	0.291587	Purifying selection
AsGRAS28	Pepsico2_Contig1385.mrna2	Zm00001eb011560_T001	0.809561	2.26667	0.357159	Purifying selection
AsGRAS28	Pepsico2_Contig1385.mrna2	Zm00001eb325750_T001	0.453736	2.95127	0.153743	Purifying selection
AsGRAS28	Pepsico2_Contig1385.mrna2	Zm00001eb325750_T003	0.453736	2.95127	0.153743	Purifying selection
AsGRAS28	Pepsico2_Contig1385.mrna2	Zm00001eb325750_T002	0.453736	2.95127	0.153743	Purifying selection
AsGRAS28	Pepsico2_Contig1385.mrna2	Zm00001eb196430_T001	0.793254	3.45438	0.229637	Purifying selection
AsGRAS28	Pepsico2_Contig1385.mrna2	Zm00001eb133730_T001	1.0206	2.45625	0.415511	Purifying selection
AsGRAS28	Pepsico2_Contig1385.mrna2	Zm00001eb158520_T001	0.689907	3.56917	0.193296	Purifying selection
AsGRAS28	Pepsico2_Contig1385.mrna2	Zm00001eb195650_T001	0.72623	3.47942	0.208722	Purifying selection
AsGRAS28	Pepsico2_Contig1385.mrna2	Zm00001eb136350_T001	0.875693	2.72538	0.321311	Purifying selection
AsGRAS28	Pepsico2_Contig1385.mrna2	Zm00001eb108090_T001	0.910036	2.51226	0.362238	Purifying selection
AsGRAS28	Pepsico2_Contig1385.mrna2	Zm00001eb379340_T001	0.976708	3.34275	0.292187	Purifying selection
AsGRAS28	Pepsico2_Contig1385.mrna2	Zm00001eb378590_T001	0.904343	4.21755	0.214424	Purifying selection
AsGRAS28	Pepsico2_Contig1385.mrna2	Zm00001eb054480_T001	0.763151	2.28952	0.333324	Purifying selection
AsGRAS28	Pepsico2_Contig1385.mrna2	Zm00001eb378590_T002	0.904343	4.21755	0.214424	Purifying selection
AsGRAS28	Pepsico2_Contig1385.mrna2	Zm00001eb054480_T002	0.742864	2.38213	0.311849	Purifying selection
AsGRAS28	Pepsico2_Contig1385.mrna2	Zm00001eb285410_T001	0.776478	2.51295	0.30899	Purifying selection
AsGRAS28	Pepsico2_Contig1385.mrna2	Zm00001eb291930_T001	0.828323	1.88192	0.440149	Purifying selection
AsGRAS28	Pepsico2_Contig1385.mrna2	Zm00001eb000470_T001	0.881225	2.98829	0.294893	Purifying selection
AsGRAS28	Pepsico2_Contig1385.mrna2	Zm00001eb170110_T001	0.731515	4.0363	0.181234	Purifying selection
AsGRAS28	Pepsico2_Contig1385.mrna2	Zm00001eb164530_T001	0.904491	3.09252	0.292477	Purifying selection
AsGRAS28	Pepsico2_Contig1385.mrna2	Zm00001eb139470_T001	0.837748	3.56506	0.234989	Purifying selection
AsGRAS28	Pepsico2_Contig1385.mrna2	Zm00001eb301400_T001	1.05482	2.31375	0.455894	Purifying selection
AsGRAS28	Pepsico2_Contig1385.mrna2	Zm00001eb148290_T002	0.853662	2.09942	0.406618	Purifying selection
AsGRAS28	Pepsico2_Contig1385.mrna2	Zm00001eb148290_T001	0.853662	2.09942	0.406618	Purifying selection
AsGRAS28	Pepsico2_Contig1385.mrna2	Zm00001eb164350_T001	0.864151	2.4175	0.357456	Purifying selection
AsGRAS28	Pepsico2_Contig1385.mrna2	Zm00001eb236120_T001	0.770072	2.35575	0.326891	Purifying selection
AsGRAS28	Pepsico2_Contig1385.mrna2	Zm00001eb405090_T001	0.755845	1.4523	0.520446	Purifying selection
AsGRAS28	Pepsico2_Contig1385.mrna2	Zm00001eb388460_T001	0.8328	2.9176	0.28544	Purifying selection
AsGRAS28	Pepsico2_Contig1385.mrna2	Zm00001eb196420_T001	0.754178	1.51987	0.496214	Purifying selection
AsGRAS28	Pepsico2_Contig1385.mrna2	Zm00001eb355860_T001	0.910986	2.29095	0.397645	Purifying selection
AsGRAS28	Pepsico2_Contig1385.mrna2	Zm00001eb136140_T001	0.969444	2.48688	0.389824	Purifying selection
AsGRAS28	Pepsico2_Contig1385.mrna2	Zm00001eb112130_T001	0.863002	3.31091	0.260655	Purifying selection
AsGRAS28	Pepsico2_Contig1385.mrna2	Zm00001eb093670_T001	0.790485	2.37143	0.333337	Purifying selection
AsGRAS28	Pepsico2_Contig1385.mrna2	Zm00001eb067930_T001	1.09372	2.03104	0.538504	Purifying selection
AsGRAS28	Pepsico2_Contig1385.mrna2	Zm00001eb363140_T001	0.727611	2.71926	0.267577	Purifying selection
AsGRAS28	Pepsico2_Contig1385.mrna2	Zm00001eb266930_T001	0.858356	1.78456	0.48099	Purifying selection
AsGRAS28	Pepsico2_Contig1385.mrna2	Zm00001eb266930_T002	0.907661	1.57013	0.578081	Purifying selection
AsGRAS28	Pepsico2_Contig1385.mrna2	Zm00001eb115950_T001	0.91154	2.39583	0.380469	Purifying selection
AsGRAS28	Pepsico2_Contig1385.mrna2	Zm00001eb082700_T001	0.788203	2.8276	0.278753	Purifying selection
AsGRAS28	Pepsico2_Contig1385.mrna2	Zm00001eb107910_T002	0.456506	2.10714	0.216647	Purifying selection
AsGRAS28	Pepsico2_Contig1385.mrna2	Zm00001eb107910_T001	0.456506	2.10714	0.216647	Purifying selection
AsGRAS28	Pepsico2_Contig1385.mrna2	Zm00001eb141310_T001	0.726078	2.96583	0.244814	Purifying selection
AsGRAS28	Pepsico2_Contig1385.mrna2	Zm00001eb326210_T001	0.7698	3.17122	0.242746	Purifying selection
AsGRAS28	Pepsico2_Contig1385.mrna2	Zm00001eb216610_T001	0.787385	2.87023	0.274329	Purifying selection
AsGRAS28	Pepsico2_Contig1385.mrna2	Zm00001eb428430_T001	0.795302	3.53215	0.225161	Purifying selection
AsGRAS28	Pepsico2_Contig1385.mrna2	Zm00001eb249840_T002	0.909674	3.26139	0.278922	Purifying selection
AsGRAS28	Pepsico2_Contig1385.mrna2	Zm00001eb106490_T001	0.0654417	0.703542	0.0930175	Purifying selection
AsGRAS28	Pepsico2_Contig1385.mrna2	Zm00001eb081760_T001	1.01382	2.20498	0.459789	Purifying selection
AsGRAS28	Pepsico2_Contig1385.mrna2	Zm00001eb164490_T001	0.93859	3.32864	0.281974	Purifying selection
AsGRAS28	Pepsico2_Contig1385.mrna2	Zm00001eb186770_T002	0.827225	4.86674	0.169975	Purifying selection
AsGRAS28	Pepsico2_Contig1385.mrna2	Zm00001eb326020_T001	0.981003	2.42292	0.404885	Purifying selection
AsGRAS28	Pepsico2_Contig1385.mrna2	Zm00001eb186770_T001	0.867216	3.17096	0.273487	Purifying selection
AsGRAS28	Pepsico2_Contig1385.mrna2	Zm00001eb020850_T001	0.90155	2.75757	0.326937	Purifying selection
AsGRAS28	Pepsico2_Contig1385.mrna2	Zm00001eb186770_T003	0.8571	2.41703	0.354609	Purifying selection
AsGRAS28	Pepsico2_Contig1385.mrna2	Zm00001eb429450_T001	0.858804	3.58838	0.239329	Purifying selection
AsGRAS28	Pepsico2_Contig1385.mrna2	Zm00001eb029390_T001	0.910817	3.11248	0.292634	Purifying selection
AsGRAS28	Pepsico2_Contig1385.mrna2	Zm00001eb344400_T001	0.733148	4.46882	0.164059	Purifying selection
AsGRAS28	Pepsico2_Contig1385.mrna2	Zm00001eb002990_T001	0.74271	3.28256	0.226259	Purifying selection
AsGRAS28	Pepsico2_Contig1385.mrna2	Zm00001eb023010_T001	0.873818	3.28874	0.2657	Purifying selection
AsGRAS28	Pepsico2_Contig1385.mrna2	Zm00001eb422620_T001	0.856367	1.78418	0.479978	Purifying selection
AsGRAS29	Pepsico2_Contig10379.mrna1	Zm00001eb399000_T001	1.0363	2.02242	0.512409	Purifying selection
AsGRAS29	Pepsico2_Contig10379.mrna1	Zm00001eb268460_T001	0.801043	1.42529	0.562019	Purifying selection
AsGRAS29	Pepsico2_Contig10379.mrna1	Zm00001eb301410_T001	0.882208	2.51936	0.350171	Purifying selection
AsGRAS29	Pepsico2_Contig10379.mrna1	Zm00001eb164480_T001	0.801473	2.74866	0.291587	Purifying selection
AsGRAS29	Pepsico2_Contig10379.mrna1	Zm00001eb164480_T002	0.801473	2.74866	0.291587	Purifying selection
AsGRAS29	Pepsico2_Contig10379.mrna1	Zm00001eb011560_T001	0.809561	2.26667	0.357159	Purifying selection
AsGRAS29	Pepsico2_Contig10379.mrna1	Zm00001eb325750_T001	0.453736	2.95127	0.153743	Purifying selection
AsGRAS29	Pepsico2_Contig10379.mrna1	Zm00001eb325750_T003	0.453736	2.95127	0.153743	Purifying selection
AsGRAS29	Pepsico2_Contig10379.mrna1	Zm00001eb325750_T002	0.453736	2.95127	0.153743	Purifying selection
AsGRAS29	Pepsico2_Contig10379.mrna1	Zm00001eb196430_T001	0.793254	3.45438	0.229637	Purifying selection
AsGRAS29	Pepsico2_Contig10379.mrna1	Zm00001eb133730_T001	1.0206	2.45625	0.415511	Purifying selection
AsGRAS29	Pepsico2_Contig10379.mrna1	Zm00001eb158520_T001	0.689907	3.56917	0.193296	Purifying selection
AsGRAS29	Pepsico2_Contig10379.mrna1	Zm00001eb195650_T001	0.72623	3.47942	0.208722	Purifying selection
AsGRAS29	Pepsico2_Contig10379.mrna1	Zm00001eb136350_T001	0.875693	2.72538	0.321311	Purifying selection
AsGRAS29	Pepsico2_Contig10379.mrna1	Zm00001eb108090_T001	0.910036	2.51226	0.362238	Purifying selection
AsGRAS29	Pepsico2_Contig10379.mrna1	Zm00001eb379340_T001	0.976708	3.34275	0.292187	Purifying selection
AsGRAS29	Pepsico2_Contig10379.mrna1	Zm00001eb378590_T001	0.904343	4.21755	0.214424	Purifying selection
AsGRAS29	Pepsico2_Contig10379.mrna1	Zm00001eb054480_T001	0.763151	2.28952	0.333324	Purifying selection
AsGRAS29	Pepsico2_Contig10379.mrna1	Zm00001eb378590_T002	0.904343	4.21755	0.214424	Purifying selection
AsGRAS29	Pepsico2_Contig10379.mrna1	Zm00001eb054480_T002	0.742864	2.38213	0.311849	Purifying selection
AsGRAS29	Pepsico2_Contig10379.mrna1	Zm00001eb285410_T001	0.776478	2.51295	0.30899	Purifying selection
AsGRAS29	Pepsico2_Contig10379.mrna1	Zm00001eb291930_T001	0.828323	1.88192	0.440149	Purifying selection
AsGRAS29	Pepsico2_Contig10379.mrna1	Zm00001eb000470_T001	0.881225	2.98829	0.294893	Purifying selection
AsGRAS29	Pepsico2_Contig10379.mrna1	Zm00001eb170110_T001	0.731515	4.0363	0.181234	Purifying selection
AsGRAS29	Pepsico2_Contig10379.mrna1	Zm00001eb164530_T001	0.904491	3.09252	0.292477	Purifying selection
AsGRAS29	Pepsico2_Contig10379.mrna1	Zm00001eb139470_T001	0.837748	3.56506	0.234989	Purifying selection
AsGRAS29	Pepsico2_Contig10379.mrna1	Zm00001eb301400_T001	1.05482	2.31375	0.455894	Purifying selection
AsGRAS29	Pepsico2_Contig10379.mrna1	Zm00001eb148290_T002	0.853662	2.09942	0.406618	Purifying selection
AsGRAS29	Pepsico2_Contig10379.mrna1	Zm00001eb148290_T001	0.853662	2.09942	0.406618	Purifying selection
AsGRAS29	Pepsico2_Contig10379.mrna1	Zm00001eb164350_T001	0.864151	2.4175	0.357456	Purifying selection
AsGRAS29	Pepsico2_Contig10379.mrna1	Zm00001eb236120_T001	0.770072	2.35575	0.326891	Purifying selection
AsGRAS29	Pepsico2_Contig10379.mrna1	Zm00001eb405090_T001	0.755845	1.4523	0.520446	Purifying selection
AsGRAS29	Pepsico2_Contig10379.mrna1	Zm00001eb388460_T001	0.8328	2.9176	0.28544	Purifying selection
AsGRAS29	Pepsico2_Contig10379.mrna1	Zm00001eb196420_T001	0.754178	1.51987	0.496214	Purifying selection
AsGRAS29	Pepsico2_Contig10379.mrna1	Zm00001eb355860_T001	0.910986	2.29095	0.397645	Purifying selection
AsGRAS29	Pepsico2_Contig10379.mrna1	Zm00001eb136140_T001	0.969444	2.48688	0.389824	Purifying selection
AsGRAS29	Pepsico2_Contig10379.mrna1	Zm00001eb112130_T001	0.863002	3.31091	0.260655	Purifying selection
AsGRAS29	Pepsico2_Contig10379.mrna1	Zm00001eb093670_T001	0.790485	2.37143	0.333337	Purifying selection
AsGRAS29	Pepsico2_Contig10379.mrna1	Zm00001eb067930_T001	1.09372	2.03104	0.538504	Purifying selection
AsGRAS29	Pepsico2_Contig10379.mrna1	Zm00001eb363140_T001	0.727611	2.71926	0.267577	Purifying selection
AsGRAS29	Pepsico2_Contig10379.mrna1	Zm00001eb266930_T001	0.858356	1.78456	0.48099	Purifying selection
AsGRAS29	Pepsico2_Contig10379.mrna1	Zm00001eb266930_T002	0.907661	1.57013	0.578081	Purifying selection
AsGRAS29	Pepsico2_Contig10379.mrna1	Zm00001eb115950_T001	0.91154	2.39583	0.380469	Purifying selection
AsGRAS29	Pepsico2_Contig10379.mrna1	Zm00001eb082700_T001	0.788203	2.8276	0.278753	Purifying selection
AsGRAS29	Pepsico2_Contig10379.mrna1	Zm00001eb107910_T002	0.456506	2.10714	0.216647	Purifying selection
AsGRAS29	Pepsico2_Contig10379.mrna1	Zm00001eb107910_T001	0.456506	2.10714	0.216647	Purifying selection
AsGRAS29	Pepsico2_Contig10379.mrna1	Zm00001eb141310_T001	0.726078	2.96583	0.244814	Purifying selection
AsGRAS29	Pepsico2_Contig10379.mrna1	Zm00001eb326210_T001	0.7698	3.17122	0.242746	Purifying selection
AsGRAS29	Pepsico2_Contig10379.mrna1	Zm00001eb216610_T001	0.787385	2.87023	0.274329	Purifying selection
AsGRAS29	Pepsico2_Contig10379.mrna1	Zm00001eb428430_T001	0.795302	3.53215	0.225161	Purifying selection
AsGRAS29	Pepsico2_Contig10379.mrna1	Zm00001eb249840_T002	0.909674	3.26139	0.278922	Purifying selection
AsGRAS29	Pepsico2_Contig10379.mrna1	Zm00001eb106490_T001	0.0654417	0.703542	0.0930175	Purifying selection
AsGRAS29	Pepsico2_Contig10379.mrna1	Zm00001eb081760_T001	1.01382	2.20498	0.459789	Purifying selection
AsGRAS29	Pepsico2_Contig10379.mrna1	Zm00001eb164490_T001	0.93859	3.32864	0.281974	Purifying selection
AsGRAS29	Pepsico2_Contig10379.mrna1	Zm00001eb186770_T002	0.827225	4.86674	0.169975	Purifying selection
AsGRAS29	Pepsico2_Contig10379.mrna1	Zm00001eb326020_T001	0.981003	2.42292	0.404885	Purifying selection
AsGRAS29	Pepsico2_Contig10379.mrna1	Zm00001eb186770_T001	0.867216	3.17096	0.273487	Purifying selection
AsGRAS29	Pepsico2_Contig10379.mrna1	Zm00001eb020850_T001	0.90155	2.75757	0.326937	Purifying selection
AsGRAS29	Pepsico2_Contig10379.mrna1	Zm00001eb186770_T003	0.8571	2.41703	0.354609	Purifying selection
AsGRAS29	Pepsico2_Contig10379.mrna1	Zm00001eb429450_T001	0.858804	3.58838	0.239329	Purifying selection
AsGRAS29	Pepsico2_Contig10379.mrna1	Zm00001eb029390_T001	0.910817	3.11248	0.292634	Purifying selection
AsGRAS29	Pepsico2_Contig10379.mrna1	Zm00001eb344400_T001	0.733148	4.46882	0.164059	Purifying selection
AsGRAS29	Pepsico2_Contig10379.mrna1	Zm00001eb002990_T001	0.74271	3.28256	0.226259	Purifying selection
AsGRAS29	Pepsico2_Contig10379.mrna1	Zm00001eb023010_T001	0.873818	3.28874	0.2657	Purifying selection
AsGRAS29	Pepsico2_Contig10379.mrna1	Zm00001eb422620_T001	0.856367	1.78418	0.479978	Purifying selection
AsGRAS30	Pepsico1_Contig28179.mrna1	Zm00001eb399000_T001	0.837156	1.56769	0.534006	Purifying selection
AsGRAS30	Pepsico1_Contig28179.mrna1	Zm00001eb268460_T001	0.784771	0.797548	0.98398	Purifying selection
AsGRAS30	Pepsico1_Contig28179.mrna1	Zm00001eb301410_T001	0.971032	0.863731	1.12423	Purifying selection
AsGRAS30	Pepsico1_Contig28179.mrna1	Zm00001eb164500_T001	0.943766	1.09327	0.863253	Purifying selection
AsGRAS30	Pepsico1_Contig28179.mrna1	Zm00001eb164480_T001	0.882994	0.949563	0.929895	Purifying selection
AsGRAS30	Pepsico1_Contig28179.mrna1	Zm00001eb164480_T002	0.882994	0.949563	0.929895	Purifying selection
AsGRAS30	Pepsico1_Contig28179.mrna1	Zm00001eb011560_T001	0.816905	1.18183	0.691221	Purifying selection
AsGRAS30	Pepsico1_Contig28179.mrna1	Zm00001eb202270_T001	0.933114	2.86145	0.326099	Purifying selection
AsGRAS30	Pepsico1_Contig28179.mrna1	Zm00001eb055700_T001	0.768847	1.27125	0.604796	Purifying selection
AsGRAS30	Pepsico1_Contig28179.mrna1	Zm00001eb325750_T001	0.736879	1.08786	0.677363	Purifying selection
AsGRAS30	Pepsico1_Contig28179.mrna1	Zm00001eb325750_T003	0.736879	1.08786	0.677363	Purifying selection
AsGRAS30	Pepsico1_Contig28179.mrna1	Zm00001eb049620_T001	0.88763	1.23155	0.720745	Purifying selection
AsGRAS30	Pepsico1_Contig28179.mrna1	Zm00001eb325750_T002	0.736879	1.08786	0.677363	Purifying selection
AsGRAS30	Pepsico1_Contig28179.mrna1	Zm00001eb215870_T001	0.770869	1.23307	0.625162	Purifying selection
AsGRAS30	Pepsico1_Contig28179.mrna1	Zm00001eb196430_T001	0.76786	0.995808	0.771092	Purifying selection
AsGRAS30	Pepsico1_Contig28179.mrna1	Zm00001eb133730_T001	0.90308	2.48432	0.363512	Purifying selection
AsGRAS30	Pepsico1_Contig28179.mrna1	Zm00001eb019640_T001	0.751775	1.14361	0.65737	Purifying selection
AsGRAS30	Pepsico1_Contig28179.mrna1	Zm00001eb158520_T001	0.735024	1.02895	0.714343	Purifying selection
AsGRAS30	Pepsico1_Contig28179.mrna1	Zm00001eb195650_T001	0.803308	0.963361	0.83386	Purifying selection
AsGRAS30	Pepsico1_Contig28179.mrna1	Zm00001eb308090_T001	0.74054	0.837596	0.884126	Purifying selection
AsGRAS30	Pepsico1_Contig28179.mrna1	Zm00001eb136350_T001	0.949599	1.30934	0.72525	Purifying selection
AsGRAS30	Pepsico1_Contig28179.mrna1	Zm00001eb136150_T001	0.926329	1.5569	0.594984	Purifying selection
AsGRAS30	Pepsico1_Contig28179.mrna1	Zm00001eb165340_T001	0.865584	2.84088	0.304688	Purifying selection
AsGRAS30	Pepsico1_Contig28179.mrna1	Zm00001eb108090_T001	0.92225	1.18042	0.781289	Purifying selection
AsGRAS30	Pepsico1_Contig28179.mrna1	Zm00001eb379340_T001	0.819929	0.927175	0.88433	Purifying selection
AsGRAS30	Pepsico1_Contig28179.mrna1	Zm00001eb165340_T002	0.867794	3.2412	0.267739	Purifying selection
AsGRAS30	Pepsico1_Contig28179.mrna1	Zm00001eb378590_T001	0.786858	0.942771	0.834623	Purifying selection
AsGRAS30	Pepsico1_Contig28179.mrna1	Zm00001eb054480_T001	0.75648	1.01109	0.748179	Purifying selection
AsGRAS30	Pepsico1_Contig28179.mrna1	Zm00001eb378590_T002	0.786858	0.942771	0.834623	Purifying selection
AsGRAS30	Pepsico1_Contig28179.mrna1	Zm00001eb054480_T002	0.731877	0.980313	0.746575	Purifying selection
AsGRAS30	Pepsico1_Contig28179.mrna1	Zm00001eb405080_T001	0.865788	1.00753	0.85932	Purifying selection
AsGRAS30	Pepsico1_Contig28179.mrna1	Zm00001eb285410_T001	0.852168	1.16693	0.730267	Purifying selection
AsGRAS30	Pepsico1_Contig28179.mrna1	Zm00001eb291930_T001	0.858662	0.913099	0.940382	Purifying selection
AsGRAS30	Pepsico1_Contig28179.mrna1	Zm00001eb000470_T001	0.771769	1.06918	0.721835	Purifying selection
AsGRAS30	Pepsico1_Contig28179.mrna1	Zm00001eb108250_T001	0.832099	0.883372	0.941958	Purifying selection
AsGRAS30	Pepsico1_Contig28179.mrna1	Zm00001eb108250_T002	0.832099	0.883372	0.941958	Purifying selection
AsGRAS30	Pepsico1_Contig28179.mrna1	Zm00001eb355870_T001	0.753897	4.17912	0.180396	Purifying selection
AsGRAS30	Pepsico1_Contig28179.mrna1	Zm00001eb170110_T001	0.834393	0.957543	0.87139	Purifying selection
AsGRAS30	Pepsico1_Contig28179.mrna1	Zm00001eb164530_T001	0.889451	1.71295	0.519251	Purifying selection
AsGRAS30	Pepsico1_Contig28179.mrna1	Zm00001eb164530_T002	0.918885	2.05377	0.447414	Purifying selection
AsGRAS30	Pepsico1_Contig28179.mrna1	Zm00001eb139470_T001	0.791801	1.14994	0.688559	Purifying selection
AsGRAS30	Pepsico1_Contig28179.mrna1	Zm00001eb392980_T001	0.900213	1.04369	0.862533	Purifying selection
AsGRAS30	Pepsico1_Contig28179.mrna1	Zm00001eb301400_T001	0.758806	1.3906	0.545669	Purifying selection
AsGRAS30	Pepsico1_Contig28179.mrna1	Zm00001eb148290_T002	0.917346	1.86145	0.492813	Purifying selection
AsGRAS30	Pepsico1_Contig28179.mrna1	Zm00001eb148290_T001	0.917346	1.86145	0.492813	Purifying selection
AsGRAS30	Pepsico1_Contig28179.mrna1	Zm00001eb164350_T001	0.907055	1.04264	0.869963	Purifying selection
AsGRAS30	Pepsico1_Contig28179.mrna1	Zm00001eb236120_T001	0.826638	1.03758	0.7967	Purifying selection
AsGRAS30	Pepsico1_Contig28179.mrna1	Zm00001eb405090_T001	0.682011	1.00916	0.675819	Purifying selection
AsGRAS30	Pepsico1_Contig28179.mrna1	Zm00001eb164470_T001	0.957715	1.36867	0.699741	Purifying selection
AsGRAS30	Pepsico1_Contig28179.mrna1	Zm00001eb187310_T001	0.24317	0.7348	0.330934	Purifying selection
AsGRAS30	Pepsico1_Contig28179.mrna1	Zm00001eb388460_T001	0.865505	0.982441	0.880974	Purifying selection
AsGRAS30	Pepsico1_Contig28179.mrna1	Zm00001eb196420_T001	0.804007	0.858002	0.937069	Purifying selection
AsGRAS30	Pepsico1_Contig28179.mrna1	Zm00001eb136140_T001	0.608628	1.50586	0.404172	Purifying selection
AsGRAS30	Pepsico1_Contig28179.mrna1	Zm00001eb112130_T001	0.953282	2.72336	0.350039	Purifying selection
AsGRAS30	Pepsico1_Contig28179.mrna1	Zm00001eb093670_T002	0.873283	0.933228	0.935766	Purifying selection
AsGRAS30	Pepsico1_Contig28179.mrna1	Zm00001eb093670_T001	0.790432	0.905423	0.872998	Purifying selection
AsGRAS30	Pepsico1_Contig28179.mrna1	Zm00001eb067930_T001	1.11448	1.37419	0.811012	Purifying selection
AsGRAS30	Pepsico1_Contig28179.mrna1	Zm00001eb363140_T001	0.759806	0.749561	1.01367	Purifying selection
AsGRAS30	Pepsico1_Contig28179.mrna1	Zm00001eb324600_T001	0.882587	1.00488	0.878299	Purifying selection
AsGRAS30	Pepsico1_Contig28179.mrna1	Zm00001eb073130_T001	0.152225	0.616361	0.246974	Purifying selection
AsGRAS30	Pepsico1_Contig28179.mrna1	Zm00001eb115950_T001	0.930287	1.22437	0.759808	Purifying selection
AsGRAS30	Pepsico1_Contig28179.mrna1	Zm00001eb398990_T001	0.933224	0.912455	1.02276	Purifying selection
AsGRAS30	Pepsico1_Contig28179.mrna1	Zm00001eb082700_T001	0.785526	1.29862	0.604894	Purifying selection
AsGRAS30	Pepsico1_Contig28179.mrna1	Zm00001eb107910_T002	0.806026	1.28503	0.627244	Purifying selection
AsGRAS30	Pepsico1_Contig28179.mrna1	Zm00001eb107910_T001	0.806026	1.28503	0.627244	Purifying selection
AsGRAS30	Pepsico1_Contig28179.mrna1	Zm00001eb141310_T001	0.74789	0.741324	1.00886	Purifying selection
AsGRAS30	Pepsico1_Contig28179.mrna1	Zm00001eb326210_T001	0.845021	0.883317	0.956646	Purifying selection
AsGRAS30	Pepsico1_Contig28179.mrna1	Zm00001eb216610_T001	0.757362	0.849774	0.891252	Purifying selection
AsGRAS30	Pepsico1_Contig28179.mrna1	Zm00001eb249840_T001	0.822044	2.11119	0.389375	Purifying selection
AsGRAS30	Pepsico1_Contig28179.mrna1	Zm00001eb428430_T001	0.152088	0.593293	0.256345	Purifying selection
AsGRAS30	Pepsico1_Contig28179.mrna1	Zm00001eb249840_T002	0.778827	2.47815	0.314277	Purifying selection
AsGRAS30	Pepsico1_Contig28179.mrna1	Zm00001eb106490_T001	0.853373	3.05745	0.279113	Purifying selection
AsGRAS30	Pepsico1_Contig28179.mrna1	Zm00001eb081760_T001	0.915822	1.0382	0.882121	Purifying selection
AsGRAS30	Pepsico1_Contig28179.mrna1	Zm00001eb405110_T001	0.778127	0.771108	1.0091	Purifying selection
AsGRAS30	Pepsico1_Contig28179.mrna1	Zm00001eb164490_T001	0.897091	1.12769	0.795513	Purifying selection
AsGRAS30	Pepsico1_Contig28179.mrna1	Zm00001eb074460_T001	0.86787	1.67294	0.518771	Purifying selection
AsGRAS30	Pepsico1_Contig28179.mrna1	Zm00001eb186770_T002	0.835847	1.47882	0.565213	Purifying selection
AsGRAS30	Pepsico1_Contig28179.mrna1	Zm00001eb327300_T001	1.08583	1.85156	0.586442	Purifying selection
AsGRAS30	Pepsico1_Contig28179.mrna1	Zm00001eb326020_T001	0.853332	1.08765	0.784563	Purifying selection
AsGRAS30	Pepsico1_Contig28179.mrna1	Zm00001eb186770_T001	0.783515	1.57734	0.496732	Purifying selection
AsGRAS30	Pepsico1_Contig28179.mrna1	Zm00001eb020850_T001	0.91966	0.927942	0.991075	Purifying selection
AsGRAS30	Pepsico1_Contig28179.mrna1	Zm00001eb186770_T003	0.7926	1.65642	0.478503	Purifying selection
AsGRAS30	Pepsico1_Contig28179.mrna1	Zm00001eb429450_T001	0.825342	1.97551	0.417787	Purifying selection
AsGRAS30	Pepsico1_Contig28179.mrna1	Zm00001eb326550_T001	0.748839	1.88364	0.397548	Purifying selection
AsGRAS30	Pepsico1_Contig28179.mrna1	Zm00001eb029390_T001	0.866408	1.11533	0.776816	Purifying selection
AsGRAS30	Pepsico1_Contig28179.mrna1	Zm00001eb344400_T001	0.884131	2.23491	0.3956	Purifying selection
AsGRAS30	Pepsico1_Contig28179.mrna1	Zm00001eb002990_T001	0.760567	1.15929	0.656065	Purifying selection
AsGRAS30	Pepsico1_Contig28179.mrna1	Zm00001eb291030_T001	0.775608	1.09748	0.706719	Purifying selection
AsGRAS30	Pepsico1_Contig28179.mrna1	Zm00001eb067940_T001	1.05354	0.708869	1.48623	Purifying selection
AsGRAS30	Pepsico1_Contig28179.mrna1	Zm00001eb023010_T001	0.872034	1.01452	0.859555	Purifying selection
AsGRAS30	Pepsico1_Contig28179.mrna1	Zm00001eb422620_T001	0.854785	1.06291	0.804197	Purifying selection

## Sheet: As.Ta
Table S5 One-to-one orthologous relationships between the GRAS gene members in Avena Sativa and Triticum aestivum
AsGRAS Gene Name	AsGRAS Gene ID	TaGRAS Gene ID	Ka	Ks	Ka/Ks	Selection Pressure
AsGRAS01	Pepsico1_Contig29889.mrna1	TraesCS2D02G194800.1	0.855646	0.9086	0.941719	Purifying selection
AsGRAS01	Pepsico1_Contig29889.mrna1	TraesCS4B02G133000.1	1.15266	1.42379	0.80957	Purifying selection
AsGRAS01	Pepsico1_Contig29889.mrna1	TraesCS7D02G174300.1	0.839085	0.916149	0.915882	Purifying selection
AsGRAS01	Pepsico1_Contig29889.mrna1	TraesCS4D02G136200.1	1.03085	1.68798	0.610699	Purifying selection
AsGRAS01	Pepsico1_Contig29889.mrna1	TraesCS4D02G054000.1	0.699381	0.854603	0.818369	Purifying selection
AsGRAS01	Pepsico1_Contig29889.mrna1	TraesCS2D02G198200.1	0.885166	1.06854	0.828388	Purifying selection
AsGRAS01	Pepsico1_Contig29889.mrna1	TraesCS4A02G191300.1	0.814131	1.11259	0.731744	Purifying selection
AsGRAS01	Pepsico1_Contig29889.mrna1	TraesCS2B02G481900.1	0.809096	0.958796	0.843867	Purifying selection
AsGRAS01	Pepsico1_Contig29889.mrna1	TraesCS5A02G506000.1	1.00065	1.25232	0.799033	Purifying selection
AsGRAS01	Pepsico1_Contig29889.mrna1	TraesCS4A02G185900.1	1.01744	1.43045	0.711273	Purifying selection
AsGRAS01	Pepsico1_Contig29889.mrna1	TraesCS2B02G320700.1	0.732569	0.876409	0.835875	Purifying selection
AsGRAS01	Pepsico1_Contig29889.mrna1	TraesCS1D02G421200.1	0.77796	1.10098	0.706605	Purifying selection
AsGRAS01	Pepsico1_Contig29889.mrna1	TraesCS2D02G055700.1	0.810635	1.1193	0.724236	Purifying selection
AsGRAS01	Pepsico1_Contig29889.mrna1	TraesCS2D02G302600.1	0.757375	0.824391	0.918709	Purifying selection
AsGRAS01	Pepsico1_Contig29889.mrna1	TraesCS4B02G367300.1	0.260623	0.545958	0.477367	Purifying selection
AsGRAS01	Pepsico1_Contig29889.mrna1	TraesCS6D02G153000.1	0.842477	0.828495	1.01688	Purifying selection
AsGRAS01	Pepsico1_Contig29889.mrna1	TraesCS5D02G139500.1	0.845976	0.803006	1.05351	Purifying selection
AsGRAS01	Pepsico1_Contig29889.mrna1	TraesCS4D02G122000.1	0.860744	1.31874	0.652702	Purifying selection
AsGRAS01	Pepsico1_Contig29889.mrna1	TraesCS2A02G395400.1	0.798177	0.996578	0.800918	Purifying selection
AsGRAS01	Pepsico1_Contig29889.mrna1	TraesCS7D02G174100.1	0.852145	0.88043	0.967873	Purifying selection
AsGRAS01	Pepsico1_Contig29889.mrna1	TraesCS5A02G505900.1	0.977114	1.61825	0.603809	Purifying selection
AsGRAS01	Pepsico1_Contig29889.mrna1	TraesCS3B02G392600.1	0.88431	1.6737	0.528355	Purifying selection
AsGRAS01	Pepsico1_Contig29889.mrna1	TraesCS6B02G191800.1	0.867832	0.826845	1.04957	Purifying selection
AsGRAS01	Pepsico1_Contig29889.mrna1	TraesCS2D02G208500.1	0.759038	0.801217	0.947356	Purifying selection
AsGRAS01	Pepsico1_Contig29889.mrna1	TraesCS4D02G136400.1	1.06947	1.1883	0.899994	Purifying selection
AsGRAS01	Pepsico1_Contig29889.mrna1	TraesCS2B02G112100.1	0.855533	1.11082	0.770183	Purifying selection
AsGRAS01	Pepsico1_Contig29889.mrna1	TraesCS4A02G088500.1	0.892166	1.00272	0.889744	Purifying selection
AsGRAS01	Pepsico1_Contig29889.mrna1	TraesCS7D02G379200.1	0.818504	0.993507	0.823854	Purifying selection
AsGRAS01	Pepsico1_Contig29889.mrna1	TraesCS4A02G465000.1	0.890077	2.55074	0.348949	Purifying selection
AsGRAS01	Pepsico1_Contig29889.mrna1	TraesCS3D02G385500.1	0.852368	1.11068	0.767426	Purifying selection
AsGRAS01	Pepsico1_Contig29889.mrna1	TraesCS1B02G443800.1	0.761294	1.06811	0.712746	Purifying selection
AsGRAS01	Pepsico1_Contig29889.mrna1	TraesCS1A02G304000.1	0.724113	0.902557	0.80229	Purifying selection
AsGRAS01	Pepsico1_Contig29889.mrna1	TraesCS2A02G304000.1	0.735517	0.885333	0.83078	Purifying selection
AsGRAS01	Pepsico1_Contig29889.mrna1	TraesCS2B02G562400.1	0.812431	1.3889	0.584946	Purifying selection
AsGRAS01	Pepsico1_Contig29889.mrna1	TraesCS4D02G135900.1	0.968333	1.27332	0.760477	Purifying selection
AsGRAS01	Pepsico1_Contig29889.mrna1	TraesCS2D02G220200.1	0.905852	2.02617	0.447077	Purifying selection
AsGRAS01	Pepsico1_Contig29889.mrna1	TraesCS4B02G141500.1	0.918672	1.396	0.658075	Purifying selection
AsGRAS01	Pepsico1_Contig29889.mrna1	TraesCS1A02G413800.1	0.772405	0.96762	0.798252	Purifying selection
AsGRAS01	Pepsico1_Contig29889.mrna1	TraesCS4B02G342800.1	0.759436	0.971463	0.781745	Purifying selection
AsGRAS01	Pepsico1_Contig29889.mrna1	TraesCS6A02G247200.1	0.38894	1.39659	0.278492	Purifying selection
AsGRAS01	Pepsico1_Contig29889.mrna1	TraesCS3A02G392500.1	0.858635	1.10985	0.77365	Purifying selection
AsGRAS01	Pepsico1_Contig29889.mrna1	TraesCS5B02G494500.1	0.983103	1.39556	0.704449	Purifying selection
AsGRAS01	Pepsico1_Contig29889.mrna1	TraesCS4D02G127800.2	0.896682	2.22364	0.40325	Purifying selection
AsGRAS01	Pepsico1_Contig29889.mrna1	TraesCS4A02G466700.1	0.765955	1.22244	0.626578	Purifying selection
AsGRAS01	Pepsico1_Contig29889.mrna1	TraesCS4D02G127800.1	0.915293	1.91361	0.478307	Purifying selection
AsGRAS01	Pepsico1_Contig29889.mrna1	TraesCS3B02G424600.1	0.856132	1.11354	0.768838	Purifying selection
AsGRAS01	Pepsico1_Contig29889.mrna1	TraesCS4D02G040400.1	0.776652	0.81149	0.957069	Purifying selection
AsGRAS01	Pepsico1_Contig29889.mrna1	TraesCS7A02G382800.1	0.773074	0.988725	0.78189	Purifying selection
AsGRAS01	Pepsico1_Contig29889.mrna1	TraesCS3A02G392600.1	0.803612	1.08242	0.742423	Purifying selection
AsGRAS01	Pepsico1_Contig29889.mrna1	TraesCS7A02G173000.1	0.853522	0.895895	0.952703	Purifying selection
AsGRAS01	Pepsico1_Contig29889.mrna1	TraesCS4A02G176400.1	0.942494	1.43159	0.658354	Purifying selection
AsGRAS01	Pepsico1_Contig29889.mrna1	TraesCS5B02G143100.1	0.775362	0.998634	0.776422	Purifying selection
AsGRAS01	Pepsico1_Contig29889.mrna1	TraesCS2B02G212300.1	0.878917	1.01041	0.869861	Purifying selection
AsGRAS01	Pepsico1_Contig29889.mrna1	TraesCS4B02G141400.1	0.917532	1.34179	0.683813	Purifying selection
AsGRAS01	Pepsico1_Contig29889.mrna1	TraesCS3A02G233000.1	0.757864	0.895986	0.845843	Purifying selection
AsGRAS01	Pepsico1_Contig29889.mrna1	TraesCS5A02G080300.2	0.829844	1.37984	0.601405	Purifying selection
AsGRAS01	Pepsico1_Contig29889.mrna1	TraesCS4A02G209800.1	0.771186	2.0804	0.37069	Purifying selection
AsGRAS01	Pepsico1_Contig29889.mrna1	TraesCS5A02G080300.1	0.826637	1.48008	0.558508	Purifying selection
AsGRAS01	Pepsico1_Contig29889.mrna1	TraesCS4B02G140800.1	0.946926	1.44265	0.656378	Purifying selection
AsGRAS01	Pepsico1_Contig29889.mrna1	TraesCS2D02G193300.1	0.856592	0.948276	0.903315	Purifying selection
AsGRAS01	Pepsico1_Contig29889.mrna1	TraesCS7B02G077800.1	0.827958	0.908636	0.91121	Purifying selection
AsGRAS01	Pepsico1_Contig29889.mrna1	TraesCS4D02G216200.1	0.894467	0.965162	0.926753	Purifying selection
AsGRAS01	Pepsico1_Contig29889.mrna1	TraesCS1D02G212800.1	0.0579636	0.299234	0.193707	Purifying selection
AsGRAS01	Pepsico1_Contig29889.mrna1	TraesCS4A02G177100.1	0.811222	1.35911	0.596878	Purifying selection
AsGRAS01	Pepsico1_Contig29889.mrna1	TraesCS5A02G325800.1	0.879386	3.76933	0.233301	Purifying selection
AsGRAS01	Pepsico1_Contig29889.mrna1	TraesCS4A02G176700.1	0.964915	1.28379	0.751616	Purifying selection
AsGRAS01	Pepsico1_Contig29889.mrna1	TraesCS4B02G336200.1	0.985971	1.27473	0.773473	Purifying selection
AsGRAS01	Pepsico1_Contig29889.mrna1	TraesCS2D02G393200.1	0.793676	1.02913	0.771208	Purifying selection
AsGRAS01	Pepsico1_Contig29889.mrna1	TraesCSU02G014000.1	0.923437	1.2866	0.717734	Purifying selection
AsGRAS01	Pepsico1_Contig29889.mrna1	TraesCS4A02G176200.1	0.862284	1.53483	0.561812	Purifying selection
AsGRAS01	Pepsico1_Contig29889.mrna1	TraesCS2D02G460500.1	0.809299	0.969486	0.834771	Purifying selection
AsGRAS01	Pepsico1_Contig29889.mrna1	TraesCS4A02G271000.1	0.782447	0.72135	1.0847	Purifying selection
AsGRAS01	Pepsico1_Contig29889.mrna1	TraesCS4A02G482000.1	0.435276	0.808444	0.538412	Purifying selection
AsGRAS01	Pepsico1_Contig29889.mrna1	TraesCS5A02G135000.1	0.837392	0.837669	0.999669	Purifying selection
AsGRAS01	Pepsico1_Contig29889.mrna1	TraesCS4B02G141200.1	0.98842	1.45249	0.680501	Purifying selection
AsGRAS01	Pepsico1_Contig29889.mrna1	TraesCS5A02G535000.1	0.252631	0.528156	0.478327	Purifying selection
AsGRAS01	Pepsico1_Contig29889.mrna1	TraesCS2A02G194600.1	0.832531	0.859559	0.968556	Purifying selection
AsGRAS01	Pepsico1_Contig29889.mrna1	TraesCS5B02G133800.1	0.853728	0.837473	1.01941	Purifying selection
AsGRAS01	Pepsico1_Contig29889.mrna1	TraesCS2D02G095300.1	0.845529	1.03082	0.82025	Purifying selection
AsGRAS01	Pepsico1_Contig29889.mrna1	TraesCS2A02G532900.1	0.768473	1.22686	0.626374	Purifying selection
AsGRAS01	Pepsico1_Contig29889.mrna1	TraesCS4D02G135500.1	0.9821	1.34681	0.729202	Purifying selection
AsGRAS01	Pepsico1_Contig29889.mrna1	TraesCS2B02G217500.1	0.885225	1.19186	0.742724	Purifying selection
AsGRAS01	Pepsico1_Contig29889.mrna1	TraesCS4A02G260600.1	0.696059	0.850086	0.81881	Purifying selection
AsGRAS01	Pepsico1_Contig29889.mrna1	TraesCS2A02G096800.1	0.837397	0.992011	0.84414	Purifying selection
AsGRAS01	Pepsico1_Contig29889.mrna1	TraesCS3A02G360300.1	0.872064	1.71451	0.508636	Purifying selection
AsGRAS01	Pepsico1_Contig29889.mrna1	TraesCS4A02G430600.1	0.77163	0.724305	1.06534	Purifying selection
AsGRAS01	Pepsico1_Contig29889.mrna1	TraesCS4D02G338800.1	0.757322	1.03877	0.729054	Purifying selection
AsGRAS01	Pepsico1_Contig29889.mrna1	TraesCS7A02G059000.1	0.783185	0.867459	0.902849	Purifying selection
AsGRAS01	Pepsico1_Contig29889.mrna1	TraesCS4D02G110800.2	0.832094	1.61405	0.515533	Purifying selection
AsGRAS01	Pepsico1_Contig29889.mrna1	TraesCS2B02G413500.1	0.803697	1.15375	0.696596	Purifying selection
AsGRAS01	Pepsico1_Contig29889.mrna1	TraesCS2A02G460200.1	0.808229	0.906493	0.891599	Purifying selection
AsGRAS01	Pepsico1_Contig29889.mrna1	TraesCS5D02G092000.1	0.923469	1.42636	0.64743	Purifying selection
AsGRAS01	Pepsico1_Contig29889.mrna1	TraesCS4B02G124000.1	0.843126	1.28557	0.655839	Purifying selection
AsGRAS01	Pepsico1_Contig29889.mrna1	TraesCS4D02G360200.1	0.261687	0.553199	0.473043	Purifying selection
AsGRAS01	Pepsico1_Contig29889.mrna1	TraesCS1A02G209400.1	0.0546789	0.269444	0.202933	Purifying selection
AsGRAS01	Pepsico1_Contig29889.mrna1	TraesCS7D02G011400.1	0.430062	0.8438	0.509673	Purifying selection
AsGRAS01	Pepsico1_Contig29889.mrna1	TraesCS5D02G494900.1	0.941523	1.44925	0.649664	Purifying selection
AsGRAS01	Pepsico1_Contig29889.mrna1	TraesCS1D02G303500.1	0.762366	0.974206	0.782551	Purifying selection
AsGRAS01	Pepsico1_Contig29889.mrna1	TraesCS4D02G136100.1	0.876566	1.50316	0.58315	Purifying selection
AsGRAS01	Pepsico1_Contig29889.mrna1	TraesCS5A02G144000.1	0.787109	1.0135	0.776623	Purifying selection
AsGRAS01	Pepsico1_Contig29889.mrna1	TraesCS4B02G054000.1	0.690892	0.843081	0.819485	Purifying selection
AsGRAS01	Pepsico1_Contig29889.mrna1	TraesCS2D02G534700.1	0.75014	1.37021	0.547464	Purifying selection
AsGRAS01	Pepsico1_Contig29889.mrna1	TraesCS3A02G392400.1	0.859974	1.18059	0.728425	Purifying selection
AsGRAS01	Pepsico1_Contig29889.mrna1	TraesCS4B02G113300.1	0.763706	1.98494	0.384751	Purifying selection
AsGRAS01	Pepsico1_Contig29889.mrna1	TraesCS7A02G014200.1	0.462384	0.82975	0.557258	Purifying selection
AsGRAS01	Pepsico1_Contig29889.mrna1	TraesCS4D02G136300.1	0.919737	1.50802	0.609897	Purifying selection
AsGRAS01	Pepsico1_Contig29889.mrna1	TraesCS3D02G220100.1	0.753758	1.06912	0.705027	Purifying selection
AsGRAS01	Pepsico1_Contig29889.mrna1	TraesCS1B02G223400.1	0.0611989	0.286588	0.213543	Purifying selection
AsGRAS01	Pepsico1_Contig29889.mrna1	TraesCS1B02G314500.1	0.70419	0.881953	0.798444	Purifying selection
AsGRAS01	Pepsico1_Contig29889.mrna1	TraesCS4A02G176500.1	0.917449	1.56108	0.587702	Purifying selection
AsGRAS01	Pepsico1_Contig29889.mrna1	TraesCS5D02G332000.1	0.886391	3.72602	0.237892	Purifying selection
AsGRAS01	Pepsico1_Contig29889.mrna1	TraesCS3D02G220100.3	0.751411	0.997305	0.753441	Purifying selection
AsGRAS01	Pepsico1_Contig29889.mrna1	TraesCS3D02G220100.2	0.759473	0.966238	0.78601	Purifying selection
AsGRAS01	Pepsico1_Contig29889.mrna1	TraesCS4D02G332000.1	0.965426	1.33743	0.721854	Purifying selection
AsGRAS01	Pepsico1_Contig29889.mrna1	TraesCS4D02G110800.1	0.804446	1.98367	0.405534	Purifying selection
AsGRAS01	Pepsico1_Contig29889.mrna1	TraesCS3D02G354100.1	0.929215	2.65987	0.349346	Purifying selection
AsGRAS01	Pepsico1_Contig29889.mrna1	TraesCS3B02G535100.1	0.778705	0.902885	0.862463	Purifying selection
AsGRAS01	Pepsico1_Contig29889.mrna1	TraesCS1A02G319700.1	0.877126	0.917117	0.956395	Purifying selection
AsGRAS01	Pepsico1_Contig29889.mrna1	TraesCS6A02G159500.1	0.832718	0.825644	1.00857	Purifying selection
AsGRAS01	Pepsico1_Contig29889.mrna1	TraesCS2A02G192600.1	0.865927	0.930102	0.931002	Purifying selection
AsGRAS01	Pepsico1_Contig29889.mrna1	TraesCS4B02G215700.1	0.897775	0.98722	0.909397	Purifying selection
AsGRAS01	Pepsico1_Contig29889.mrna1	TraesCS3D02G385400.1	0.863642	1.1286	0.765233	Purifying selection
AsGRAS01	Pepsico1_Contig29889.mrna1	TraesCS6D02G229400.1	0.37976	1.36206	0.278813	Purifying selection
AsGRAS01	Pepsico1_Contig29889.mrna1	TraesCS7D02G053600.1	0.789277	0.747045	1.05653	Purifying selection
AsGRAS01	Pepsico1_Contig29889.mrna1	TraesCS5A02G511900.1	0.778612	0.997574	0.780506	Purifying selection
AsGRAS01	Pepsico1_Contig29889.mrna1	TraesCS2A02G189600.1	0.871232	0.994749	0.875831	Purifying selection
AsGRAS01	Pepsico1_Contig29889.mrna1	TraesCS5B02G326100.1	0.916623	4.03931	0.226926	Purifying selection
AsGRAS01	Pepsico1_Contig29889.mrna1	TraesCS4B02G043100.1	0.753955	0.854912	0.881909	Purifying selection
AsGRAS01	Pepsico1_Contig29889.mrna1	TraesCS7B02G078300.1	0.806321	0.981469	0.821545	Purifying selection
AsGRAS01	Pepsico1_Contig29889.mrna1	TraesCS4A02G176600.1	0.845166	1.37564	0.614381	Purifying selection
AsGRAS01	Pepsico1_Contig29889.mrna1	TraesCS2A02G214400.1	0.91416	2.02675	0.451047	Purifying selection
AsGRAS01	Pepsico1_Contig29889.mrna1	TraesCS4A02G176300.1	0.956514	1.11536	0.857582	Purifying selection
AsGRAS01	Pepsico1_Contig29889.mrna1	TraesCS4D02G136500.1	0.895005	1.55443	0.575778	Purifying selection
AsGRAS01	Pepsico1_Contig29889.mrna1	TraesCS3B02G424500.1	0.855654	1.10991	0.770924	Purifying selection
AsGRAS01	Pepsico1_Contig29889.mrna1	TraesCS6B02G277400.1	0.391139	1.5144	0.258279	Purifying selection
AsGRAS01	Pepsico1_Contig29889.mrna1	TraesCS2B02G239400.1	0.90497	2.11789	0.427298	Purifying selection
AsGRAS01	Pepsico1_Contig29889.mrna1	TraesCS2B02G228000.1	0.759031	0.771484	0.983858	Purifying selection
AsGRAS01	Pepsico1_Contig29889.mrna1	TraesCS5D02G148000.1	0.764655	0.964998	0.79239	Purifying selection
AsGRAS01	Pepsico1_Contig29889.mrna1	TraesCS6D02G055100.1	0.807678	1.0512	0.768338	Purifying selection
AsGRAS01	Pepsico1_Contig29889.mrna1	TraesCS4B02G141300.1	0.935744	1.39373	0.671397	Purifying selection
AsGRAS01	Pepsico1_Contig29889.mrna1	TraesCS1D02G319500.1	0.81442	0.886495	0.918696	Purifying selection
AsGRAS01	Pepsico1_Contig29889.mrna1	TraesCS3D02G482600.1	0.762211	0.93628	0.814085	Purifying selection
AsGRAS01	Pepsico1_Contig29889.mrna1	TraesCS2B02G214600.1	0.839014	0.931124	0.901077	Purifying selection
AsGRAS01	Pepsico1_Contig29889.mrna1	TraesCS4D02G136000.1	0.874338	1.59922	0.546726	Purifying selection
AsGRAS01	Pepsico1_Contig29889.mrna1	TraesCS1B02G332000.1	0.833815	0.913968	0.912302	Purifying selection
AsGRAS01	Pepsico1_Contig29889.mrna1	TraesCS5A02G481300.1	0.983159	1.49444	0.657876	Purifying selection
AsGRAS01	Pepsico1_Contig29889.mrna1	TraesCS2A02G200700.1	0.770017	0.848084	0.907949	Purifying selection
AsGRAS01	Pepsico1_Contig29889.mrna1	TraesCS7B02G285500.1	0.827621	0.978039	0.846204	Purifying selection
AsGRAS01	Pepsico1_Contig29889.mrna1	TraesCS3B02G262400.1	0.741631	1.02283	0.725077	Purifying selection
AsGRAS01	Pepsico1_Contig29889.mrna1	TraesCS5A02G506100.1	1.06854	1.25211	0.853393	Purifying selection
AsGRAS01	Pepsico1_Contig29889.mrna1	TraesCS3A02G487500.1	0.830092	0.902062	0.920216	Purifying selection
AsGRAS01	Pepsico1_Contig29889.mrna1	TraesCS4B02G141100.1	0.913115	1.70599	0.535239	Purifying selection
AsGRAS02	Pepsico2_Contig16967.mrna1	TraesCS2D02G194800.1	0.736445	0.838019	0.878792	Purifying selection
AsGRAS02	Pepsico2_Contig16967.mrna1	TraesCS4B02G133000.1	0.75915	0.943589	0.804534	Purifying selection
AsGRAS02	Pepsico2_Contig16967.mrna1	TraesCS7D02G174300.1	0.849318	0.708512	1.19873	Purifying selection
AsGRAS02	Pepsico2_Contig16967.mrna1	TraesCS4D02G136200.1	0.896997	1.75793	0.510257	Purifying selection
AsGRAS02	Pepsico2_Contig16967.mrna1	TraesCS4D02G054000.1	0.652846	0.790731	0.825624	Purifying selection
AsGRAS02	Pepsico2_Contig16967.mrna1	TraesCS5B02G138100.1	0.931265	3.69564	0.25199	Purifying selection
AsGRAS02	Pepsico2_Contig16967.mrna1	TraesCS2D02G198200.1	0.719009	0.817028	0.880029	Purifying selection
AsGRAS02	Pepsico2_Contig16967.mrna1	TraesCS4A02G191300.1	0.649974	0.752282	0.864004	Purifying selection
AsGRAS02	Pepsico2_Contig16967.mrna1	TraesCS2B02G481900.1	0.787141	0.850762	0.925219	Purifying selection
AsGRAS02	Pepsico2_Contig16967.mrna1	TraesCS5A02G506000.1	0.90966	0.997464	0.911973	Purifying selection
AsGRAS02	Pepsico2_Contig16967.mrna1	TraesCS4A02G185900.1	0.710063	1.3586	0.522643	Purifying selection
AsGRAS02	Pepsico2_Contig16967.mrna1	TraesCS2B02G320700.1	0.706548	0.693689	1.01854	Purifying selection
AsGRAS02	Pepsico2_Contig16967.mrna1	TraesCS1D02G421200.1	0.233692	0.4558	0.512709	Purifying selection
AsGRAS02	Pepsico2_Contig16967.mrna1	TraesCS2D02G055700.1	0.711963	1.03079	0.690699	Purifying selection
AsGRAS02	Pepsico2_Contig16967.mrna1	TraesCS2D02G302600.1	0.749463	0.689419	1.08709	Purifying selection
AsGRAS02	Pepsico2_Contig16967.mrna1	TraesCS4B02G367300.1	0.776046	0.761212	1.01949	Purifying selection
AsGRAS02	Pepsico2_Contig16967.mrna1	TraesCS6D02G153000.1	0.589239	0.70979	0.83016	Purifying selection
AsGRAS02	Pepsico2_Contig16967.mrna1	TraesCS5D02G139500.1	0.689529	0.698257	0.9875	Purifying selection
AsGRAS02	Pepsico2_Contig16967.mrna1	TraesCS4D02G122000.1	0.648411	0.740376	0.875786	Purifying selection
AsGRAS02	Pepsico2_Contig16967.mrna1	TraesCS2A02G395400.1	0.779999	0.864613	0.902137	Purifying selection
AsGRAS02	Pepsico2_Contig16967.mrna1	TraesCS7D02G174100.1	0.827712	0.683665	1.2107	Purifying selection
AsGRAS02	Pepsico2_Contig16967.mrna1	TraesCS5A02G505900.1	0.852179	1.36948	0.622266	Purifying selection
AsGRAS02	Pepsico2_Contig16967.mrna1	TraesCS3B02G392600.1	0.91723	2.26804	0.404416	Purifying selection
AsGRAS02	Pepsico2_Contig16967.mrna1	TraesCS6B02G191800.1	0.603303	0.758328	0.795569	Purifying selection
AsGRAS02	Pepsico2_Contig16967.mrna1	TraesCS2D02G208500.1	0.652753	0.577265	1.13077	Purifying selection
AsGRAS02	Pepsico2_Contig16967.mrna1	TraesCS4D02G136400.1	0.883125	1.03643	0.852083	Purifying selection
AsGRAS02	Pepsico2_Contig16967.mrna1	TraesCS2B02G112100.1	0.594112	1.15683	0.51357	Purifying selection
AsGRAS02	Pepsico2_Contig16967.mrna1	TraesCS4A02G088500.1	0.698356	0.776063	0.89987	Purifying selection
AsGRAS02	Pepsico2_Contig16967.mrna1	TraesCS7D02G379200.1	0.63755	0.757776	0.841344	Purifying selection
AsGRAS02	Pepsico2_Contig16967.mrna1	TraesCS4A02G465000.1	0.757609	2.44239	0.310192	Purifying selection
AsGRAS02	Pepsico2_Contig16967.mrna1	TraesCS3D02G385500.1	0.711659	0.747888	0.951559	Purifying selection
AsGRAS02	Pepsico2_Contig16967.mrna1	TraesCS1B02G443800.1	0.224215	0.4138	0.541844	Purifying selection
AsGRAS02	Pepsico2_Contig16967.mrna1	TraesCS1A02G304000.1	0.635056	0.973803	0.652141	Purifying selection
AsGRAS02	Pepsico2_Contig16967.mrna1	TraesCS2A02G304000.1	0.699983	0.708483	0.988002	Purifying selection
AsGRAS02	Pepsico2_Contig16967.mrna1	TraesCS2B02G562400.1	0.7394	1.12462	0.657466	Purifying selection
AsGRAS02	Pepsico2_Contig16967.mrna1	TraesCS4D02G135900.1	0.945259	1.02451	0.922642	Purifying selection
AsGRAS02	Pepsico2_Contig16967.mrna1	TraesCS2D02G220200.1	0.772652	2.28181	0.338613	Purifying selection
AsGRAS02	Pepsico2_Contig16967.mrna1	TraesCS5D02G419400.2	0.744321	3.79084	0.196348	Purifying selection
AsGRAS02	Pepsico2_Contig16967.mrna1	TraesCS4B02G141500.1	0.908123	1.23785	0.733631	Purifying selection
AsGRAS02	Pepsico2_Contig16967.mrna1	TraesCS1A02G413800.1	0.219105	0.418854	0.523105	Purifying selection
AsGRAS02	Pepsico2_Contig16967.mrna1	TraesCS4B02G342800.1	0.215415	0.438572	0.491173	Purifying selection
AsGRAS02	Pepsico2_Contig16967.mrna1	TraesCS6A02G247200.1	0.811853	1.53575	0.528635	Purifying selection
AsGRAS02	Pepsico2_Contig16967.mrna1	TraesCS3A02G392500.1	0.675716	0.759258	0.88997	Purifying selection
AsGRAS02	Pepsico2_Contig16967.mrna1	TraesCS5B02G494500.1	0.808218	1.5564	0.519287	Purifying selection
AsGRAS02	Pepsico2_Contig16967.mrna1	TraesCS4D02G127800.2	0.753919	1.30939	0.57578	Purifying selection
AsGRAS02	Pepsico2_Contig16967.mrna1	TraesCS4A02G466700.1	0.403524	1.00834	0.400186	Purifying selection
AsGRAS02	Pepsico2_Contig16967.mrna1	TraesCS4D02G127800.1	0.770069	1.23746	0.622299	Purifying selection
AsGRAS02	Pepsico2_Contig16967.mrna1	TraesCS3B02G424600.1	0.70735	0.729397	0.969773	Purifying selection
AsGRAS02	Pepsico2_Contig16967.mrna1	TraesCS4D02G040400.1	0.467531	0.632696	0.73895	Purifying selection
AsGRAS02	Pepsico2_Contig16967.mrna1	TraesCS7A02G382800.1	0.682862	0.697519	0.978986	Purifying selection
AsGRAS02	Pepsico2_Contig16967.mrna1	TraesCS3A02G392600.1	0.694541	0.80509	0.862687	Purifying selection
AsGRAS02	Pepsico2_Contig16967.mrna1	TraesCS7A02G173000.1	0.845616	0.697719	1.21197	Purifying selection
AsGRAS02	Pepsico2_Contig16967.mrna1	TraesCS4A02G176400.1	0.840893	1.27445	0.659808	Purifying selection
AsGRAS02	Pepsico2_Contig16967.mrna1	TraesCS5B02G143100.1	0.605817	0.730877	0.82889	Purifying selection
AsGRAS02	Pepsico2_Contig16967.mrna1	TraesCS2B02G212300.1	0.677799	0.772803	0.877066	Purifying selection
AsGRAS02	Pepsico2_Contig16967.mrna1	TraesCS4B02G141400.1	0.857258	1.25487	0.683145	Purifying selection
AsGRAS02	Pepsico2_Contig16967.mrna1	TraesCS3A02G233000.1	0.329854	0.63485	0.519579	Purifying selection
AsGRAS02	Pepsico2_Contig16967.mrna1	TraesCS5A02G080300.2	0.929373	1.67935	0.553413	Purifying selection
AsGRAS02	Pepsico2_Contig16967.mrna1	TraesCS4A02G209800.1	0.774729	2.10536	0.367978	Purifying selection
AsGRAS02	Pepsico2_Contig16967.mrna1	TraesCS5A02G080300.1	0.940919	1.80836	0.520315	Purifying selection
AsGRAS02	Pepsico2_Contig16967.mrna1	TraesCS4B02G140800.1	0.87522	1.23186	0.710486	Purifying selection
AsGRAS02	Pepsico2_Contig16967.mrna1	TraesCS2D02G193300.1	0.685614	0.756481	0.90632	Purifying selection
AsGRAS02	Pepsico2_Contig16967.mrna1	TraesCS7B02G077800.1	0.850862	0.686156	1.24004	Purifying selection
AsGRAS02	Pepsico2_Contig16967.mrna1	TraesCS4D02G216200.1	0.718045	0.81631	0.879624	Purifying selection
AsGRAS02	Pepsico2_Contig16967.mrna1	TraesCS1D02G212800.1	0.763154	0.737805	1.03436	Purifying selection
AsGRAS02	Pepsico2_Contig16967.mrna1	TraesCS4A02G177100.1	0.873442	1.43708	0.60779	Purifying selection
AsGRAS02	Pepsico2_Contig16967.mrna1	TraesCS5A02G325800.1	0.745948	1.82157	0.409508	Purifying selection
AsGRAS02	Pepsico2_Contig16967.mrna1	TraesCS4A02G176700.1	0.950541	0.980263	0.96968	Purifying selection
AsGRAS02	Pepsico2_Contig16967.mrna1	TraesCS4B02G336200.1	0.866986	1.14483	0.757305	Purifying selection
AsGRAS02	Pepsico2_Contig16967.mrna1	TraesCS2D02G393200.1	0.754472	0.883496	0.853962	Purifying selection
AsGRAS02	Pepsico2_Contig16967.mrna1	TraesCSU02G014000.1	0.79026	0.875416	0.902725	Purifying selection
AsGRAS02	Pepsico2_Contig16967.mrna1	TraesCS4A02G176200.1	0.937349	1.15467	0.81179	Purifying selection
AsGRAS02	Pepsico2_Contig16967.mrna1	TraesCS2D02G460500.1	0.798424	0.862369	0.925849	Purifying selection
AsGRAS02	Pepsico2_Contig16967.mrna1	TraesCS4A02G271000.1	0.464859	0.682751	0.680862	Purifying selection
AsGRAS02	Pepsico2_Contig16967.mrna1	TraesCS4A02G482000.1	0.748063	0.669796	1.11685	Purifying selection
AsGRAS02	Pepsico2_Contig16967.mrna1	TraesCS5A02G135000.1	0.713834	0.691853	1.03177	Purifying selection
AsGRAS02	Pepsico2_Contig16967.mrna1	TraesCS4B02G141200.1	0.917159	1.60106	0.572844	Purifying selection
AsGRAS02	Pepsico2_Contig16967.mrna1	TraesCS5A02G535000.1	0.762634	0.80793	0.943937	Purifying selection
AsGRAS02	Pepsico2_Contig16967.mrna1	TraesCS2A02G194600.1	0.689475	0.793664	0.868724	Purifying selection
AsGRAS02	Pepsico2_Contig16967.mrna1	TraesCS5B02G133800.1	0.711016	0.76643	0.927699	Purifying selection
AsGRAS02	Pepsico2_Contig16967.mrna1	TraesCS2D02G095300.1	0.588881	1.10253	0.53412	Purifying selection
AsGRAS02	Pepsico2_Contig16967.mrna1	TraesCS2A02G532900.1	0.705229	1.02966	0.684914	Purifying selection
AsGRAS02	Pepsico2_Contig16967.mrna1	TraesCS4D02G135500.1	0.901433	1.37657	0.654842	Purifying selection
AsGRAS02	Pepsico2_Contig16967.mrna1	TraesCS2B02G217500.1	0.727043	0.972824	0.747353	Purifying selection
AsGRAS02	Pepsico2_Contig16967.mrna1	TraesCS4A02G260600.1	0.649641	0.760151	0.85462	Purifying selection
AsGRAS02	Pepsico2_Contig16967.mrna1	TraesCS5B02G326400.2	0.748211	2.13245	0.35087	Purifying selection
AsGRAS02	Pepsico2_Contig16967.mrna1	TraesCS2A02G096800.1	0.607359	1.13896	0.533256	Purifying selection
AsGRAS02	Pepsico2_Contig16967.mrna1	TraesCS5B02G326400.1	0.748211	2.13245	0.35087	Purifying selection
AsGRAS02	Pepsico2_Contig16967.mrna1	TraesCS3A02G360300.1	0.899876	2.13084	0.42231	Purifying selection
AsGRAS02	Pepsico2_Contig16967.mrna1	TraesCS4A02G430600.1	0.661133	0.73084	0.90462	Purifying selection
AsGRAS02	Pepsico2_Contig16967.mrna1	TraesCS4D02G338800.1	0.211033	0.46314	0.455656	Purifying selection
AsGRAS02	Pepsico2_Contig16967.mrna1	TraesCS7A02G059000.1	0.66035	0.788737	0.837225	Purifying selection
AsGRAS02	Pepsico2_Contig16967.mrna1	TraesCS4D02G110800.2	0.791974	1.8906	0.418901	Purifying selection
AsGRAS02	Pepsico2_Contig16967.mrna1	TraesCS2B02G413500.1	0.780215	1.0266	0.76	Purifying selection
AsGRAS02	Pepsico2_Contig16967.mrna1	TraesCS2A02G460200.1	0.852424	0.743318	1.14678	Purifying selection
AsGRAS02	Pepsico2_Contig16967.mrna1	TraesCS5D02G092000.1	0.932087	1.79184	0.520185	Purifying selection
AsGRAS02	Pepsico2_Contig16967.mrna1	TraesCS4B02G124000.1	0.653554	0.798488	0.818489	Purifying selection
AsGRAS02	Pepsico2_Contig16967.mrna1	TraesCS4D02G360200.1	0.766703	0.751487	1.02025	Purifying selection
AsGRAS02	Pepsico2_Contig16967.mrna1	TraesCS1A02G209400.1	0.760629	0.720614	1.05553	Purifying selection
AsGRAS02	Pepsico2_Contig16967.mrna1	TraesCS7D02G011400.1	0.736343	0.698731	1.05383	Purifying selection
AsGRAS02	Pepsico2_Contig16967.mrna1	TraesCS5D02G494900.1	0.797026	1.79633	0.443696	Purifying selection
AsGRAS02	Pepsico2_Contig16967.mrna1	TraesCS1D02G303500.1	0.675478	0.895572	0.754242	Purifying selection
AsGRAS02	Pepsico2_Contig16967.mrna1	TraesCS4D02G136100.1	0.884084	1.68233	0.525512	Purifying selection
AsGRAS02	Pepsico2_Contig16967.mrna1	TraesCS5A02G144000.1	0.614215	0.749196	0.819832	Purifying selection
AsGRAS02	Pepsico2_Contig16967.mrna1	TraesCS4B02G054000.1	0.687668	0.807638	0.851455	Purifying selection
AsGRAS02	Pepsico2_Contig16967.mrna1	TraesCS2D02G534700.1	0.675582	0.950282	0.710929	Purifying selection
AsGRAS02	Pepsico2_Contig16967.mrna1	TraesCS3A02G392400.1	0.710509	0.712543	0.997145	Purifying selection
AsGRAS02	Pepsico2_Contig16967.mrna1	TraesCS4B02G113300.1	0.782684	2.13444	0.366693	Purifying selection
AsGRAS02	Pepsico2_Contig16967.mrna1	TraesCS7A02G014200.1	0.747948	0.713064	1.04892	Purifying selection
AsGRAS02	Pepsico2_Contig16967.mrna1	TraesCS4D02G136300.1	0.840547	1.50776	0.55748	Purifying selection
AsGRAS02	Pepsico2_Contig16967.mrna1	TraesCS3D02G220100.1	0.35044	0.701711	0.499409	Purifying selection
AsGRAS02	Pepsico2_Contig16967.mrna1	TraesCS1B02G223400.1	0.764319	0.750915	1.01785	Purifying selection
AsGRAS02	Pepsico2_Contig16967.mrna1	TraesCS1B02G314500.1	0.616919	0.790102	0.78081	Purifying selection
AsGRAS02	Pepsico2_Contig16967.mrna1	TraesCS4A02G176500.1	0.917706	1.73703	0.528319	Purifying selection
AsGRAS02	Pepsico2_Contig16967.mrna1	TraesCS5D02G332000.1	0.751596	2.50699	0.2998	Purifying selection
AsGRAS02	Pepsico2_Contig16967.mrna1	TraesCS3D02G220100.3	0.335017	0.677726	0.494325	Purifying selection
AsGRAS02	Pepsico2_Contig16967.mrna1	TraesCS5D02G332000.2	0.775091	3.2736	0.23677	Purifying selection
AsGRAS02	Pepsico2_Contig16967.mrna1	TraesCS3D02G220100.2	0.35402	0.704802	0.502297	Purifying selection
AsGRAS02	Pepsico2_Contig16967.mrna1	TraesCS4D02G332000.1	0.932736	1.13509	0.821732	Purifying selection
AsGRAS02	Pepsico2_Contig16967.mrna1	TraesCS4D02G110800.1	0.796867	2.09527	0.380318	Purifying selection
AsGRAS02	Pepsico2_Contig16967.mrna1	TraesCS3D02G354100.1	0.909661	2.12672	0.42773	Purifying selection
AsGRAS02	Pepsico2_Contig16967.mrna1	TraesCS3B02G535100.1	0.619525	0.569624	1.0876	Purifying selection
AsGRAS02	Pepsico2_Contig16967.mrna1	TraesCS1A02G319700.1	0.724562	0.634898	1.14123	Purifying selection
AsGRAS02	Pepsico2_Contig16967.mrna1	TraesCS6A02G159500.1	0.598758	0.782888	0.764807	Purifying selection
AsGRAS02	Pepsico2_Contig16967.mrna1	TraesCS2A02G192600.1	0.774961	0.852286	0.909273	Purifying selection
AsGRAS02	Pepsico2_Contig16967.mrna1	TraesCS4B02G215700.1	0.70206	0.805753	0.87131	Purifying selection
AsGRAS02	Pepsico2_Contig16967.mrna1	TraesCS3D02G385400.1	0.678556	0.739414	0.917694	Purifying selection
AsGRAS02	Pepsico2_Contig16967.mrna1	TraesCS6D02G229400.1	0.809974	1.52766	0.530205	Purifying selection
AsGRAS02	Pepsico2_Contig16967.mrna1	TraesCS7D02G053600.1	0.664645	0.766423	0.867204	Purifying selection
AsGRAS02	Pepsico2_Contig16967.mrna1	TraesCS5A02G511900.1	0.217847	0.493421	0.441503	Purifying selection
AsGRAS02	Pepsico2_Contig16967.mrna1	TraesCS2A02G189600.1	0.709291	0.737621	0.961593	Purifying selection
AsGRAS02	Pepsico2_Contig16967.mrna1	TraesCS5B02G326100.1	0.785889	1.92321	0.408635	Purifying selection
AsGRAS02	Pepsico2_Contig16967.mrna1	TraesCS4B02G043100.1	0.489107	0.734085	0.666282	Purifying selection
AsGRAS02	Pepsico2_Contig16967.mrna1	TraesCS5A02G139000.2	0.945286	3.69725	0.255673	Purifying selection
AsGRAS02	Pepsico2_Contig16967.mrna1	TraesCS7B02G078300.1	0.819859	0.658544	1.24496	Purifying selection
AsGRAS02	Pepsico2_Contig16967.mrna1	TraesCS5A02G139000.1	0.945286	3.69725	0.255673	Purifying selection
AsGRAS02	Pepsico2_Contig16967.mrna1	TraesCS4A02G176600.1	0.897201	1.41723	0.633067	Purifying selection
AsGRAS02	Pepsico2_Contig16967.mrna1	TraesCS2A02G214400.1	0.802442	2.29206	0.350097	Purifying selection
AsGRAS02	Pepsico2_Contig16967.mrna1	TraesCS4A02G176300.1	0.869518	1.0882	0.79904	Purifying selection
AsGRAS02	Pepsico2_Contig16967.mrna1	TraesCS4D02G136500.1	0.929914	1.24213	0.748644	Purifying selection
AsGRAS02	Pepsico2_Contig16967.mrna1	TraesCS3B02G424500.1	0.681412	0.790991	0.861467	Purifying selection
AsGRAS02	Pepsico2_Contig16967.mrna1	TraesCS6B02G277400.1	0.808625	1.5858	0.509916	Purifying selection
AsGRAS02	Pepsico2_Contig16967.mrna1	TraesCS2B02G239400.1	0.797327	3.40423	0.234216	Purifying selection
AsGRAS02	Pepsico2_Contig16967.mrna1	TraesCS2B02G228000.1	0.694296	0.593926	1.16899	Purifying selection
AsGRAS02	Pepsico2_Contig16967.mrna1	TraesCS5D02G148000.1	0.616056	0.717995	0.858022	Purifying selection
AsGRAS02	Pepsico2_Contig16967.mrna1	TraesCS6D02G055100.1	0.722909	1.05901	0.682628	Purifying selection
AsGRAS02	Pepsico2_Contig16967.mrna1	TraesCS4B02G141300.1	0.837934	1.41142	0.593682	Purifying selection
AsGRAS02	Pepsico2_Contig16967.mrna1	TraesCS1D02G319500.1	0.722	0.6256	1.15409	Purifying selection
AsGRAS02	Pepsico2_Contig16967.mrna1	TraesCS3D02G482600.1	0.631645	0.686516	0.920073	Purifying selection
AsGRAS02	Pepsico2_Contig16967.mrna1	TraesCS2B02G214600.1	0.773836	0.879069	0.880291	Purifying selection
AsGRAS02	Pepsico2_Contig16967.mrna1	TraesCS4D02G136000.1	0.89258	1.50749	0.592096	Purifying selection
AsGRAS02	Pepsico2_Contig16967.mrna1	TraesCS1B02G332000.1	0.730631	0.730391	1.00033	Purifying selection
AsGRAS02	Pepsico2_Contig16967.mrna1	TraesCS5A02G481300.1	0.846868	1.68888	0.501439	Purifying selection
AsGRAS02	Pepsico2_Contig16967.mrna1	TraesCS2A02G200700.1	0.647909	0.614542	1.05429	Purifying selection
AsGRAS02	Pepsico2_Contig16967.mrna1	TraesCS7B02G285500.1	0.641492	0.714986	0.897209	Purifying selection
AsGRAS02	Pepsico2_Contig16967.mrna1	TraesCS3B02G262400.1	0.339168	0.722215	0.469622	Purifying selection
AsGRAS02	Pepsico2_Contig16967.mrna1	TraesCS5D02G152700.1	0.943945	3.17799	0.297026	Purifying selection
AsGRAS02	Pepsico2_Contig16967.mrna1	TraesCS5A02G506100.1	0.895292	1.07413	0.833504	Purifying selection
AsGRAS02	Pepsico2_Contig16967.mrna1	TraesCS3A02G487500.1	0.638164	0.590208	1.08125	Purifying selection
AsGRAS02	Pepsico2_Contig16967.mrna1	TraesCS4B02G141100.1	0.859267	1.35861	0.63246	Purifying selection
AsGRAS03	Pepsico2_Contig1709.mrna2	TraesCS1B02G037300.1	0.772569	3.42595	0.225505	Purifying selection
AsGRAS03	Pepsico2_Contig1709.mrna2	TraesCS3B02G392600.1	0.798028	3.11078	0.256536	Purifying selection
AsGRAS03	Pepsico2_Contig1709.mrna2	TraesCS5B02G417000.3	0.237601	0.717491	0.331155	Purifying selection
AsGRAS03	Pepsico2_Contig1709.mrna2	TraesCS1A02G030300.1	0.830618	3.9426	0.210678	Purifying selection
AsGRAS03	Pepsico2_Contig1709.mrna2	TraesCS5B02G417000.1	0.237601	0.717491	0.331155	Purifying selection
AsGRAS03	Pepsico2_Contig1709.mrna2	TraesCS5B02G417000.2	0.237601	0.717491	0.331155	Purifying selection
AsGRAS03	Pepsico2_Contig1709.mrna2	TraesCS5D02G419400.2	0.0792411	0.522353	0.1517	Purifying selection
AsGRAS03	Pepsico2_Contig1709.mrna2	TraesCS1D02G030800.1	0.810527	4.64921	0.174336	Purifying selection
AsGRAS03	Pepsico2_Contig1709.mrna2	TraesCS5D02G419400.1	0.075614	0.512316	0.147593	Purifying selection
AsGRAS03	Pepsico2_Contig1709.mrna2	TraesCS1B02G037500.1	0.73754	2.13973	0.344688	Purifying selection
AsGRAS03	Pepsico2_Contig1709.mrna2	TraesCS4D02G127800.2	0.770244	3.54877	0.217045	Purifying selection
AsGRAS03	Pepsico2_Contig1709.mrna2	TraesCS4D02G127800.1	0.754673	5.18456	0.145562	Purifying selection
AsGRAS03	Pepsico2_Contig1709.mrna2	TraesCS5A02G325800.1	0.465683	2.59241	0.179633	Purifying selection
AsGRAS03	Pepsico2_Contig1709.mrna2	TraesCS5D02G422300.1	0.217261	0.633641	0.342877	Purifying selection
AsGRAS03	Pepsico2_Contig1709.mrna2	TraesCS1B02G037200.1	0.820404	3.0064	0.272885	Purifying selection
AsGRAS03	Pepsico2_Contig1709.mrna2	TraesCS5B02G326400.2	0.413348	2.42703	0.17031	Purifying selection
AsGRAS03	Pepsico2_Contig1709.mrna2	TraesCS5B02G326400.1	0.413348	2.42703	0.17031	Purifying selection
AsGRAS03	Pepsico2_Contig1709.mrna2	TraesCS4D02G266400.1	0.185626	0.850916	0.218148	Purifying selection
AsGRAS03	Pepsico2_Contig1709.mrna2	TraesCS5A02G414000.1	0.113829	0.547649	0.20785	Purifying selection
AsGRAS03	Pepsico2_Contig1709.mrna2	TraesCS1A02G030200.1	0.721161	2.02367	0.356364	Purifying selection
AsGRAS03	Pepsico2_Contig1709.mrna2	TraesCS1B02G037400.1	0.790556	5.15074	0.153484	Purifying selection
AsGRAS03	Pepsico2_Contig1709.mrna2	TraesCS3B02G081100.1	0.796782	3.63257	0.219344	Purifying selection
AsGRAS03	Pepsico2_Contig1709.mrna2	TraesCS1D02G031000.1	0.834858	2.08315	0.400768	Purifying selection
AsGRAS03	Pepsico2_Contig1709.mrna2	TraesCS5D02G332000.1	0.403064	2.47649	0.162756	Purifying selection
AsGRAS03	Pepsico2_Contig1709.mrna2	TraesCS5D02G332000.2	0.416666	2.30718	0.180596	Purifying selection
AsGRAS03	Pepsico2_Contig1709.mrna2	TraesCS1D02G031200.1	0.761889	2.62389	0.290367	Purifying selection
AsGRAS03	Pepsico2_Contig1709.mrna2	TraesCS3D02G354100.1	0.809431	2.99583	0.270186	Purifying selection
AsGRAS03	Pepsico2_Contig1709.mrna2	TraesCS5B02G326100.1	0.401233	2.67316	0.150097	Purifying selection
AsGRAS03	Pepsico2_Contig1709.mrna2	TraesCS4A02G039000.1	0.19387	0.878769	0.220615	Purifying selection
AsGRAS03	Pepsico2_Contig1709.mrna2	TraesCS5A02G409800.1	0.0755793	0.491434	0.153793	Purifying selection
AsGRAS03	Pepsico2_Contig1709.mrna2	TraesCS3A02G067900.1	0.79721	5.01042	0.15911	Purifying selection
AsGRAS03	Pepsico2_Contig1709.mrna2	TraesCS4B02G266700.1	0.190749	0.809833	0.235541	Purifying selection
AsGRAS03	Pepsico2_Contig1709.mrna2	TraesCS3D02G067700.1	0.772765	3.13707	0.246333	Purifying selection
AsGRAS03	Pepsico2_Contig1709.mrna2	TraesCS3B02G080900.1	0.776909	3.97144	0.195624	Purifying selection
AsGRAS04	Pepsico1_Contig26725.mrna2	TraesCS2D02G194800.1	0.855646	0.9086	0.941719	Purifying selection
AsGRAS04	Pepsico1_Contig26725.mrna2	TraesCS4B02G133000.1	1.15266	1.42379	0.80957	Purifying selection
AsGRAS04	Pepsico1_Contig26725.mrna2	TraesCS7D02G174300.1	0.843401	0.919872	0.916868	Purifying selection
AsGRAS04	Pepsico1_Contig26725.mrna2	TraesCS4D02G136200.1	1.04576	1.67919	0.622778	Purifying selection
AsGRAS04	Pepsico1_Contig26725.mrna2	TraesCS4D02G054000.1	0.714054	0.855696	0.834471	Purifying selection
AsGRAS04	Pepsico1_Contig26725.mrna2	TraesCS2D02G198200.1	0.885166	1.06854	0.828388	Purifying selection
AsGRAS04	Pepsico1_Contig26725.mrna2	TraesCS4A02G191300.1	0.814131	1.11259	0.731744	Purifying selection
AsGRAS04	Pepsico1_Contig26725.mrna2	TraesCS2B02G481900.1	0.809096	0.958796	0.843867	Purifying selection
AsGRAS04	Pepsico1_Contig26725.mrna2	TraesCS5A02G506000.1	1.01407	1.23798	0.819132	Purifying selection
AsGRAS04	Pepsico1_Contig26725.mrna2	TraesCS4A02G185900.1	1.01744	1.43045	0.711273	Purifying selection
AsGRAS04	Pepsico1_Contig26725.mrna2	TraesCS2B02G320700.1	0.732569	0.876409	0.835875	Purifying selection
AsGRAS04	Pepsico1_Contig26725.mrna2	TraesCS1D02G421200.1	0.77796	1.10098	0.706605	Purifying selection
AsGRAS04	Pepsico1_Contig26725.mrna2	TraesCS2D02G055700.1	0.810635	1.1193	0.724236	Purifying selection
AsGRAS04	Pepsico1_Contig26725.mrna2	TraesCS2D02G302600.1	0.757375	0.824391	0.918709	Purifying selection
AsGRAS04	Pepsico1_Contig26725.mrna2	TraesCS4B02G367300.1	0.271658	0.555196	0.4893	Purifying selection
AsGRAS04	Pepsico1_Contig26725.mrna2	TraesCS6D02G153000.1	0.842477	0.828495	1.01688	Purifying selection
AsGRAS04	Pepsico1_Contig26725.mrna2	TraesCS5D02G139500.1	0.845976	0.803006	1.05351	Purifying selection
AsGRAS04	Pepsico1_Contig26725.mrna2	TraesCS4D02G122000.1	0.849981	1.30361	0.652023	Purifying selection
AsGRAS04	Pepsico1_Contig26725.mrna2	TraesCS2A02G395400.1	0.800465	0.989072	0.809309	Purifying selection
AsGRAS04	Pepsico1_Contig26725.mrna2	TraesCS7D02G174100.1	0.856476	0.883923	0.968948	Purifying selection
AsGRAS04	Pepsico1_Contig26725.mrna2	TraesCS5A02G505900.1	0.977114	1.61825	0.603809	Purifying selection
AsGRAS04	Pepsico1_Contig26725.mrna2	TraesCS3B02G392600.1	0.88431	1.6737	0.528355	Purifying selection
AsGRAS04	Pepsico1_Contig26725.mrna2	TraesCS6B02G191800.1	0.867832	0.826845	1.04957	Purifying selection
AsGRAS04	Pepsico1_Contig26725.mrna2	TraesCS2D02G208500.1	0.759038	0.801217	0.947356	Purifying selection
AsGRAS04	Pepsico1_Contig26725.mrna2	TraesCS4D02G136400.1	1.04844	1.21538	0.862646	Purifying selection
AsGRAS04	Pepsico1_Contig26725.mrna2	TraesCS2B02G112100.1	0.83453	0.993401	0.840073	Purifying selection
AsGRAS04	Pepsico1_Contig26725.mrna2	TraesCS4A02G088500.1	0.892166	1.00272	0.889744	Purifying selection
AsGRAS04	Pepsico1_Contig26725.mrna2	TraesCS7D02G379200.1	0.818504	0.993507	0.823854	Purifying selection
AsGRAS04	Pepsico1_Contig26725.mrna2	TraesCS4A02G465000.1	0.90178	2.90132	0.310817	Purifying selection
AsGRAS04	Pepsico1_Contig26725.mrna2	TraesCS3D02G385500.1	0.852368	1.11068	0.767426	Purifying selection
AsGRAS04	Pepsico1_Contig26725.mrna2	TraesCS1B02G443800.1	0.761294	1.06811	0.712746	Purifying selection
AsGRAS04	Pepsico1_Contig26725.mrna2	TraesCS1A02G304000.1	0.724113	0.902557	0.80229	Purifying selection
AsGRAS04	Pepsico1_Contig26725.mrna2	TraesCS2A02G304000.1	0.735517	0.885333	0.83078	Purifying selection
AsGRAS04	Pepsico1_Contig26725.mrna2	TraesCS2B02G562400.1	0.812431	1.3889	0.584946	Purifying selection
AsGRAS04	Pepsico1_Contig26725.mrna2	TraesCS4D02G135900.1	0.968333	1.27332	0.760477	Purifying selection
AsGRAS04	Pepsico1_Contig26725.mrna2	TraesCS2D02G220200.1	0.901257	2.05186	0.439238	Purifying selection
AsGRAS04	Pepsico1_Contig26725.mrna2	TraesCS4B02G141500.1	0.918712	1.39339	0.659338	Purifying selection
AsGRAS04	Pepsico1_Contig26725.mrna2	TraesCS1A02G413800.1	0.772405	0.96762	0.798252	Purifying selection
AsGRAS04	Pepsico1_Contig26725.mrna2	TraesCS4B02G342800.1	0.759436	0.971463	0.781745	Purifying selection
AsGRAS04	Pepsico1_Contig26725.mrna2	TraesCS6A02G247200.1	0.386838	1.39513	0.277278	Purifying selection
AsGRAS04	Pepsico1_Contig26725.mrna2	TraesCS3A02G392500.1	0.858635	1.10985	0.77365	Purifying selection
AsGRAS04	Pepsico1_Contig26725.mrna2	TraesCS5B02G494500.1	0.983103	1.39556	0.704449	Purifying selection
AsGRAS04	Pepsico1_Contig26725.mrna2	TraesCS4D02G127800.2	0.896682	2.22364	0.40325	Purifying selection
AsGRAS04	Pepsico1_Contig26725.mrna2	TraesCS4A02G466700.1	0.765955	1.22244	0.626578	Purifying selection
AsGRAS04	Pepsico1_Contig26725.mrna2	TraesCS4D02G127800.1	0.915293	1.91361	0.478307	Purifying selection
AsGRAS04	Pepsico1_Contig26725.mrna2	TraesCS3B02G424600.1	0.856132	1.11354	0.768838	Purifying selection
AsGRAS04	Pepsico1_Contig26725.mrna2	TraesCS4D02G040400.1	0.776652	0.81149	0.957069	Purifying selection
AsGRAS04	Pepsico1_Contig26725.mrna2	TraesCS7A02G382800.1	0.773074	0.988725	0.78189	Purifying selection
AsGRAS04	Pepsico1_Contig26725.mrna2	TraesCS3A02G392600.1	0.803612	1.08242	0.742423	Purifying selection
AsGRAS04	Pepsico1_Contig26725.mrna2	TraesCS7A02G173000.1	0.857815	0.89943	0.953731	Purifying selection
AsGRAS04	Pepsico1_Contig26725.mrna2	TraesCS4A02G176400.1	0.942494	1.43159	0.658354	Purifying selection
AsGRAS04	Pepsico1_Contig26725.mrna2	TraesCS5B02G143100.1	0.783577	1.00219	0.781866	Purifying selection
AsGRAS04	Pepsico1_Contig26725.mrna2	TraesCS2B02G212300.1	0.878917	1.01041	0.869861	Purifying selection
AsGRAS04	Pepsico1_Contig26725.mrna2	TraesCS4B02G141400.1	0.915191	1.32273	0.691893	Purifying selection
AsGRAS04	Pepsico1_Contig26725.mrna2	TraesCS3A02G233000.1	0.757864	0.895986	0.845843	Purifying selection
AsGRAS04	Pepsico1_Contig26725.mrna2	TraesCS5A02G080300.2	0.829844	1.37984	0.601405	Purifying selection
AsGRAS04	Pepsico1_Contig26725.mrna2	TraesCS4A02G209800.1	0.771186	2.0804	0.37069	Purifying selection
AsGRAS04	Pepsico1_Contig26725.mrna2	TraesCS5A02G080300.1	0.826637	1.48008	0.558508	Purifying selection
AsGRAS04	Pepsico1_Contig26725.mrna2	TraesCS4B02G140800.1	0.915249	1.40088	0.653336	Purifying selection
AsGRAS04	Pepsico1_Contig26725.mrna2	TraesCS2D02G193300.1	0.856592	0.948276	0.903315	Purifying selection
AsGRAS04	Pepsico1_Contig26725.mrna2	TraesCS7B02G077800.1	0.832204	0.912338	0.912166	Purifying selection
AsGRAS04	Pepsico1_Contig26725.mrna2	TraesCS4D02G216200.1	0.894467	0.965162	0.926753	Purifying selection
AsGRAS04	Pepsico1_Contig26725.mrna2	TraesCS1D02G212800.1	0.0579636	0.299234	0.193707	Purifying selection
AsGRAS04	Pepsico1_Contig26725.mrna2	TraesCS4A02G177100.1	0.811222	1.35911	0.596878	Purifying selection
AsGRAS04	Pepsico1_Contig26725.mrna2	TraesCS5A02G325800.1	0.902798	3.16448	0.285291	Purifying selection
AsGRAS04	Pepsico1_Contig26725.mrna2	TraesCS4A02G176700.1	0.977184	1.2363	0.790409	Purifying selection
AsGRAS04	Pepsico1_Contig26725.mrna2	TraesCS4B02G336200.1	0.989144	1.28625	0.769012	Purifying selection
AsGRAS04	Pepsico1_Contig26725.mrna2	TraesCS2D02G393200.1	0.795935	1.02142	0.779244	Purifying selection
AsGRAS04	Pepsico1_Contig26725.mrna2	TraesCSU02G014000.1	0.923437	1.2866	0.717734	Purifying selection
AsGRAS04	Pepsico1_Contig26725.mrna2	TraesCS4A02G176200.1	0.866304	1.52612	0.56765	Purifying selection
AsGRAS04	Pepsico1_Contig26725.mrna2	TraesCS2D02G460500.1	0.809299	0.969486	0.834771	Purifying selection
AsGRAS04	Pepsico1_Contig26725.mrna2	TraesCS4A02G271000.1	0.782447	0.72135	1.0847	Purifying selection
AsGRAS04	Pepsico1_Contig26725.mrna2	TraesCS4A02G482000.1	0.446769	0.819925	0.544889	Purifying selection
AsGRAS04	Pepsico1_Contig26725.mrna2	TraesCS5A02G135000.1	0.837392	0.837669	0.999669	Purifying selection
AsGRAS04	Pepsico1_Contig26725.mrna2	TraesCS4B02G141200.1	0.98842	1.45249	0.680501	Purifying selection
AsGRAS04	Pepsico1_Contig26725.mrna2	TraesCS5A02G535000.1	0.255667	0.566842	0.451037	Purifying selection
AsGRAS04	Pepsico1_Contig26725.mrna2	TraesCS2A02G194600.1	0.832531	0.859559	0.968556	Purifying selection
AsGRAS04	Pepsico1_Contig26725.mrna2	TraesCS5B02G133800.1	0.853728	0.837473	1.01941	Purifying selection
AsGRAS04	Pepsico1_Contig26725.mrna2	TraesCS2D02G095300.1	0.823445	0.937121	0.878696	Purifying selection
AsGRAS04	Pepsico1_Contig26725.mrna2	TraesCS2A02G532900.1	0.768473	1.22686	0.626374	Purifying selection
AsGRAS04	Pepsico1_Contig26725.mrna2	TraesCS4D02G135500.1	0.935546	1.3522	0.691868	Purifying selection
AsGRAS04	Pepsico1_Contig26725.mrna2	TraesCS2B02G217500.1	0.885225	1.19186	0.742724	Purifying selection
AsGRAS04	Pepsico1_Contig26725.mrna2	TraesCS4A02G260600.1	0.710396	0.851205	0.834577	Purifying selection
AsGRAS04	Pepsico1_Contig26725.mrna2	TraesCS5B02G326400.2	0.902724	2.30034	0.392431	Purifying selection
AsGRAS04	Pepsico1_Contig26725.mrna2	TraesCS2A02G096800.1	0.837397	0.992011	0.84414	Purifying selection
AsGRAS04	Pepsico1_Contig26725.mrna2	TraesCS5B02G326400.1	0.902724	2.30034	0.392431	Purifying selection
AsGRAS04	Pepsico1_Contig26725.mrna2	TraesCS3A02G360300.1	0.858215	1.68225	0.510158	Purifying selection
AsGRAS04	Pepsico1_Contig26725.mrna2	TraesCS4A02G430600.1	0.77163	0.724305	1.06534	Purifying selection
AsGRAS04	Pepsico1_Contig26725.mrna2	TraesCS4D02G338800.1	0.757322	1.03877	0.729054	Purifying selection
AsGRAS04	Pepsico1_Contig26725.mrna2	TraesCS7A02G059000.1	0.746182	0.807091	0.924533	Purifying selection
AsGRAS04	Pepsico1_Contig26725.mrna2	TraesCS4D02G110800.2	0.832094	1.61405	0.515533	Purifying selection
AsGRAS04	Pepsico1_Contig26725.mrna2	TraesCS2B02G413500.1	0.80242	1.16053	0.691423	Purifying selection
AsGRAS04	Pepsico1_Contig26725.mrna2	TraesCS2A02G460200.1	0.808229	0.906493	0.891599	Purifying selection
AsGRAS04	Pepsico1_Contig26725.mrna2	TraesCS5D02G092000.1	0.86245	1.41239	0.610633	Purifying selection
AsGRAS04	Pepsico1_Contig26725.mrna2	TraesCS4B02G124000.1	0.80534	1.20027	0.670969	Purifying selection
AsGRAS04	Pepsico1_Contig26725.mrna2	TraesCS4D02G360200.1	0.253575	0.547849	0.462855	Purifying selection
AsGRAS04	Pepsico1_Contig26725.mrna2	TraesCS1A02G209400.1	0.0546789	0.269444	0.202933	Purifying selection
AsGRAS04	Pepsico1_Contig26725.mrna2	TraesCS7D02G011400.1	0.430062	0.8438	0.509673	Purifying selection
AsGRAS04	Pepsico1_Contig26725.mrna2	TraesCS5D02G494900.1	0.946108	1.44586	0.654357	Purifying selection
AsGRAS04	Pepsico1_Contig26725.mrna2	TraesCS1D02G303500.1	0.762366	0.974206	0.782551	Purifying selection
AsGRAS04	Pepsico1_Contig26725.mrna2	TraesCS4D02G136100.1	0.876566	1.50316	0.58315	Purifying selection
AsGRAS04	Pepsico1_Contig26725.mrna2	TraesCS5A02G144000.1	0.818225	1.0021	0.816511	Purifying selection
AsGRAS04	Pepsico1_Contig26725.mrna2	TraesCS4B02G054000.1	0.705482	0.844248	0.835633	Purifying selection
AsGRAS04	Pepsico1_Contig26725.mrna2	TraesCS2D02G534700.1	0.75014	1.37021	0.547464	Purifying selection
AsGRAS04	Pepsico1_Contig26725.mrna2	TraesCS3A02G392400.1	0.859974	1.18059	0.728425	Purifying selection
AsGRAS04	Pepsico1_Contig26725.mrna2	TraesCS4B02G113300.1	0.763706	1.98494	0.384751	Purifying selection
AsGRAS04	Pepsico1_Contig26725.mrna2	TraesCS7A02G014200.1	0.465993	0.812406	0.573595	Purifying selection
AsGRAS04	Pepsico1_Contig26725.mrna2	TraesCS4D02G136300.1	0.89617	1.47784	0.606406	Purifying selection
AsGRAS04	Pepsico1_Contig26725.mrna2	TraesCS3D02G220100.1	0.753758	1.06912	0.705027	Purifying selection
AsGRAS04	Pepsico1_Contig26725.mrna2	TraesCS1B02G223400.1	0.0611989	0.286588	0.213543	Purifying selection
AsGRAS04	Pepsico1_Contig26725.mrna2	TraesCS1B02G314500.1	0.70419	0.881953	0.798444	Purifying selection
AsGRAS04	Pepsico1_Contig26725.mrna2	TraesCS4A02G176500.1	0.941239	1.53017	0.61512	Purifying selection
AsGRAS04	Pepsico1_Contig26725.mrna2	TraesCS3D02G220100.3	0.751411	0.997305	0.753441	Purifying selection
AsGRAS04	Pepsico1_Contig26725.mrna2	TraesCS3D02G220100.2	0.759473	0.966238	0.78601	Purifying selection
AsGRAS04	Pepsico1_Contig26725.mrna2	TraesCS4D02G332000.1	0.985338	1.29998	0.757965	Purifying selection
AsGRAS04	Pepsico1_Contig26725.mrna2	TraesCS4D02G110800.1	0.804446	1.98367	0.405534	Purifying selection
AsGRAS04	Pepsico1_Contig26725.mrna2	TraesCS3D02G354100.1	0.919649	2.4743	0.371681	Purifying selection
AsGRAS04	Pepsico1_Contig26725.mrna2	TraesCS3B02G535100.1	0.778705	0.902885	0.862463	Purifying selection
AsGRAS04	Pepsico1_Contig26725.mrna2	TraesCS1A02G319700.1	0.877126	0.917117	0.956395	Purifying selection
AsGRAS04	Pepsico1_Contig26725.mrna2	TraesCS6A02G159500.1	0.832718	0.825644	1.00857	Purifying selection
AsGRAS04	Pepsico1_Contig26725.mrna2	TraesCS2A02G192600.1	0.865927	0.930102	0.931002	Purifying selection
AsGRAS04	Pepsico1_Contig26725.mrna2	TraesCS4B02G215700.1	0.897775	0.98722	0.909397	Purifying selection
AsGRAS04	Pepsico1_Contig26725.mrna2	TraesCS3D02G385400.1	0.863642	1.1286	0.765233	Purifying selection
AsGRAS04	Pepsico1_Contig26725.mrna2	TraesCS6D02G229400.1	0.37976	1.36206	0.278813	Purifying selection
AsGRAS04	Pepsico1_Contig26725.mrna2	TraesCS7D02G053600.1	0.789277	0.747045	1.05653	Purifying selection
AsGRAS04	Pepsico1_Contig26725.mrna2	TraesCS5A02G511900.1	0.778612	0.997574	0.780506	Purifying selection
AsGRAS04	Pepsico1_Contig26725.mrna2	TraesCS2A02G189600.1	0.871232	0.994749	0.875831	Purifying selection
AsGRAS04	Pepsico1_Contig26725.mrna2	TraesCS5B02G326100.1	0.904231	2.73537	0.33057	Purifying selection
AsGRAS04	Pepsico1_Contig26725.mrna2	TraesCS4B02G043100.1	0.753955	0.854912	0.881909	Purifying selection
AsGRAS04	Pepsico1_Contig26725.mrna2	TraesCS7B02G078300.1	0.81055	0.985563	0.822424	Purifying selection
AsGRAS04	Pepsico1_Contig26725.mrna2	TraesCS4A02G176600.1	0.860204	1.40256	0.613311	Purifying selection
AsGRAS04	Pepsico1_Contig26725.mrna2	TraesCS2A02G214400.1	0.909473	2.05285	0.443029	Purifying selection
AsGRAS04	Pepsico1_Contig26725.mrna2	TraesCS4A02G176300.1	0.958245	1.09205	0.877474	Purifying selection
AsGRAS04	Pepsico1_Contig26725.mrna2	TraesCS4D02G136500.1	0.898838	1.52852	0.588043	Purifying selection
AsGRAS04	Pepsico1_Contig26725.mrna2	TraesCS3B02G424500.1	0.855654	1.10991	0.770924	Purifying selection
AsGRAS04	Pepsico1_Contig26725.mrna2	TraesCS6B02G277400.1	0.389027	1.51308	0.25711	Purifying selection
AsGRAS04	Pepsico1_Contig26725.mrna2	TraesCS2B02G239400.1	0.900343	2.14753	0.419245	Purifying selection
AsGRAS04	Pepsico1_Contig26725.mrna2	TraesCS2B02G228000.1	0.759031	0.771484	0.983858	Purifying selection
AsGRAS04	Pepsico1_Contig26725.mrna2	TraesCS5D02G148000.1	0.762525	0.964186	0.790848	Purifying selection
AsGRAS04	Pepsico1_Contig26725.mrna2	TraesCS6D02G055100.1	0.807678	1.0512	0.768338	Purifying selection
AsGRAS04	Pepsico1_Contig26725.mrna2	TraesCS4B02G141300.1	0.911822	1.39793	0.652267	Purifying selection
AsGRAS04	Pepsico1_Contig26725.mrna2	TraesCS1D02G319500.1	0.81442	0.886495	0.918696	Purifying selection
AsGRAS04	Pepsico1_Contig26725.mrna2	TraesCS3D02G482600.1	0.762211	0.93628	0.814085	Purifying selection
AsGRAS04	Pepsico1_Contig26725.mrna2	TraesCS2B02G214600.1	0.839014	0.931124	0.901077	Purifying selection
AsGRAS04	Pepsico1_Contig26725.mrna2	TraesCS4D02G136000.1	0.887095	1.57915	0.561755	Purifying selection
AsGRAS04	Pepsico1_Contig26725.mrna2	TraesCS1B02G332000.1	0.833815	0.913968	0.912302	Purifying selection
AsGRAS04	Pepsico1_Contig26725.mrna2	TraesCS5A02G481300.1	0.983159	1.49444	0.657876	Purifying selection
AsGRAS04	Pepsico1_Contig26725.mrna2	TraesCS2A02G200700.1	0.770017	0.848084	0.907949	Purifying selection
AsGRAS04	Pepsico1_Contig26725.mrna2	TraesCS7B02G285500.1	0.827621	0.978039	0.846204	Purifying selection
AsGRAS04	Pepsico1_Contig26725.mrna2	TraesCS3B02G262400.1	0.741631	1.02283	0.725077	Purifying selection
AsGRAS04	Pepsico1_Contig26725.mrna2	TraesCS5A02G506100.1	1.07369	1.24586	0.861802	Purifying selection
AsGRAS04	Pepsico1_Contig26725.mrna2	TraesCS3A02G487500.1	0.830092	0.902062	0.920216	Purifying selection
AsGRAS04	Pepsico1_Contig26725.mrna2	TraesCS4B02G141100.1	0.913115	1.70599	0.535239	Purifying selection
AsGRAS05	Pepsico1_Contig13965.mrna2	TraesCS2D02G194800.1	0.855646	0.9086	0.941719	Purifying selection
AsGRAS05	Pepsico1_Contig13965.mrna2	TraesCS4B02G133000.1	1.15266	1.42379	0.80957	Purifying selection
AsGRAS05	Pepsico1_Contig13965.mrna2	TraesCS7D02G174300.1	0.843401	0.919872	0.916868	Purifying selection
AsGRAS05	Pepsico1_Contig13965.mrna2	TraesCS4D02G136200.1	1.04576	1.67919	0.622778	Purifying selection
AsGRAS05	Pepsico1_Contig13965.mrna2	TraesCS4D02G054000.1	0.714054	0.855696	0.834471	Purifying selection
AsGRAS05	Pepsico1_Contig13965.mrna2	TraesCS2D02G198200.1	0.885166	1.06854	0.828388	Purifying selection
AsGRAS05	Pepsico1_Contig13965.mrna2	TraesCS4A02G191300.1	0.814131	1.11259	0.731744	Purifying selection
AsGRAS05	Pepsico1_Contig13965.mrna2	TraesCS2B02G481900.1	0.809096	0.958796	0.843867	Purifying selection
AsGRAS05	Pepsico1_Contig13965.mrna2	TraesCS5A02G506000.1	1.01407	1.23798	0.819132	Purifying selection
AsGRAS05	Pepsico1_Contig13965.mrna2	TraesCS4A02G185900.1	1.01744	1.43045	0.711273	Purifying selection
AsGRAS05	Pepsico1_Contig13965.mrna2	TraesCS2B02G320700.1	0.732569	0.876409	0.835875	Purifying selection
AsGRAS05	Pepsico1_Contig13965.mrna2	TraesCS1D02G421200.1	0.77796	1.10098	0.706605	Purifying selection
AsGRAS05	Pepsico1_Contig13965.mrna2	TraesCS2D02G055700.1	0.810635	1.1193	0.724236	Purifying selection
AsGRAS05	Pepsico1_Contig13965.mrna2	TraesCS2D02G302600.1	0.757375	0.824391	0.918709	Purifying selection
AsGRAS05	Pepsico1_Contig13965.mrna2	TraesCS4B02G367300.1	0.271658	0.555196	0.4893	Purifying selection
AsGRAS05	Pepsico1_Contig13965.mrna2	TraesCS6D02G153000.1	0.842477	0.828495	1.01688	Purifying selection
AsGRAS05	Pepsico1_Contig13965.mrna2	TraesCS5D02G139500.1	0.845976	0.803006	1.05351	Purifying selection
AsGRAS05	Pepsico1_Contig13965.mrna2	TraesCS4D02G122000.1	0.849981	1.30361	0.652023	Purifying selection
AsGRAS05	Pepsico1_Contig13965.mrna2	TraesCS2A02G395400.1	0.800465	0.989072	0.809309	Purifying selection
AsGRAS05	Pepsico1_Contig13965.mrna2	TraesCS7D02G174100.1	0.856476	0.883923	0.968948	Purifying selection
AsGRAS05	Pepsico1_Contig13965.mrna2	TraesCS5A02G505900.1	0.977114	1.61825	0.603809	Purifying selection
AsGRAS05	Pepsico1_Contig13965.mrna2	TraesCS3B02G392600.1	0.88431	1.6737	0.528355	Purifying selection
AsGRAS05	Pepsico1_Contig13965.mrna2	TraesCS6B02G191800.1	0.867832	0.826845	1.04957	Purifying selection
AsGRAS05	Pepsico1_Contig13965.mrna2	TraesCS2D02G208500.1	0.759038	0.801217	0.947356	Purifying selection
AsGRAS05	Pepsico1_Contig13965.mrna2	TraesCS4D02G136400.1	1.04844	1.21538	0.862646	Purifying selection
AsGRAS05	Pepsico1_Contig13965.mrna2	TraesCS2B02G112100.1	0.83453	0.993401	0.840073	Purifying selection
AsGRAS05	Pepsico1_Contig13965.mrna2	TraesCS4A02G088500.1	0.892166	1.00272	0.889744	Purifying selection
AsGRAS05	Pepsico1_Contig13965.mrna2	TraesCS7D02G379200.1	0.818504	0.993507	0.823854	Purifying selection
AsGRAS05	Pepsico1_Contig13965.mrna2	TraesCS4A02G465000.1	0.90178	2.90132	0.310817	Purifying selection
AsGRAS05	Pepsico1_Contig13965.mrna2	TraesCS3D02G385500.1	0.852368	1.11068	0.767426	Purifying selection
AsGRAS05	Pepsico1_Contig13965.mrna2	TraesCS1B02G443800.1	0.761294	1.06811	0.712746	Purifying selection
AsGRAS05	Pepsico1_Contig13965.mrna2	TraesCS1A02G304000.1	0.724113	0.902557	0.80229	Purifying selection
AsGRAS05	Pepsico1_Contig13965.mrna2	TraesCS2A02G304000.1	0.735517	0.885333	0.83078	Purifying selection
AsGRAS05	Pepsico1_Contig13965.mrna2	TraesCS2B02G562400.1	0.812431	1.3889	0.584946	Purifying selection
AsGRAS05	Pepsico1_Contig13965.mrna2	TraesCS4D02G135900.1	0.968333	1.27332	0.760477	Purifying selection
AsGRAS05	Pepsico1_Contig13965.mrna2	TraesCS2D02G220200.1	0.901257	2.05186	0.439238	Purifying selection
AsGRAS05	Pepsico1_Contig13965.mrna2	TraesCS4B02G141500.1	0.918712	1.39339	0.659338	Purifying selection
AsGRAS05	Pepsico1_Contig13965.mrna2	TraesCS1A02G413800.1	0.772405	0.96762	0.798252	Purifying selection
AsGRAS05	Pepsico1_Contig13965.mrna2	TraesCS4B02G342800.1	0.759436	0.971463	0.781745	Purifying selection
AsGRAS05	Pepsico1_Contig13965.mrna2	TraesCS6A02G247200.1	0.386838	1.39513	0.277278	Purifying selection
AsGRAS05	Pepsico1_Contig13965.mrna2	TraesCS3A02G392500.1	0.858635	1.10985	0.77365	Purifying selection
AsGRAS05	Pepsico1_Contig13965.mrna2	TraesCS5B02G494500.1	0.983103	1.39556	0.704449	Purifying selection
AsGRAS05	Pepsico1_Contig13965.mrna2	TraesCS4D02G127800.2	0.896682	2.22364	0.40325	Purifying selection
AsGRAS05	Pepsico1_Contig13965.mrna2	TraesCS4A02G466700.1	0.765955	1.22244	0.626578	Purifying selection
AsGRAS05	Pepsico1_Contig13965.mrna2	TraesCS4D02G127800.1	0.915293	1.91361	0.478307	Purifying selection
AsGRAS05	Pepsico1_Contig13965.mrna2	TraesCS3B02G424600.1	0.856132	1.11354	0.768838	Purifying selection
AsGRAS05	Pepsico1_Contig13965.mrna2	TraesCS4D02G040400.1	0.776652	0.81149	0.957069	Purifying selection
AsGRAS05	Pepsico1_Contig13965.mrna2	TraesCS7A02G382800.1	0.773074	0.988725	0.78189	Purifying selection
AsGRAS05	Pepsico1_Contig13965.mrna2	TraesCS3A02G392600.1	0.803612	1.08242	0.742423	Purifying selection
AsGRAS05	Pepsico1_Contig13965.mrna2	TraesCS7A02G173000.1	0.857815	0.89943	0.953731	Purifying selection
AsGRAS05	Pepsico1_Contig13965.mrna2	TraesCS4A02G176400.1	0.942494	1.43159	0.658354	Purifying selection
AsGRAS05	Pepsico1_Contig13965.mrna2	TraesCS5B02G143100.1	0.783577	1.00219	0.781866	Purifying selection
AsGRAS05	Pepsico1_Contig13965.mrna2	TraesCS2B02G212300.1	0.878917	1.01041	0.869861	Purifying selection
AsGRAS05	Pepsico1_Contig13965.mrna2	TraesCS4B02G141400.1	0.915191	1.32273	0.691893	Purifying selection
AsGRAS05	Pepsico1_Contig13965.mrna2	TraesCS3A02G233000.1	0.757864	0.895986	0.845843	Purifying selection
AsGRAS05	Pepsico1_Contig13965.mrna2	TraesCS5A02G080300.2	0.829844	1.37984	0.601405	Purifying selection
AsGRAS05	Pepsico1_Contig13965.mrna2	TraesCS4A02G209800.1	0.771186	2.0804	0.37069	Purifying selection
AsGRAS05	Pepsico1_Contig13965.mrna2	TraesCS5A02G080300.1	0.826637	1.48008	0.558508	Purifying selection
AsGRAS05	Pepsico1_Contig13965.mrna2	TraesCS4B02G140800.1	0.915249	1.40088	0.653336	Purifying selection
AsGRAS05	Pepsico1_Contig13965.mrna2	TraesCS2D02G193300.1	0.856592	0.948276	0.903315	Purifying selection
AsGRAS05	Pepsico1_Contig13965.mrna2	TraesCS7B02G077800.1	0.832204	0.912338	0.912166	Purifying selection
AsGRAS05	Pepsico1_Contig13965.mrna2	TraesCS4D02G216200.1	0.894467	0.965162	0.926753	Purifying selection
AsGRAS05	Pepsico1_Contig13965.mrna2	TraesCS1D02G212800.1	0.0579636	0.299234	0.193707	Purifying selection
AsGRAS05	Pepsico1_Contig13965.mrna2	TraesCS4A02G177100.1	0.811222	1.35911	0.596878	Purifying selection
AsGRAS05	Pepsico1_Contig13965.mrna2	TraesCS5A02G325800.1	0.902798	3.16448	0.285291	Purifying selection
AsGRAS05	Pepsico1_Contig13965.mrna2	TraesCS4A02G176700.1	0.977184	1.2363	0.790409	Purifying selection
AsGRAS05	Pepsico1_Contig13965.mrna2	TraesCS4B02G336200.1	0.989144	1.28625	0.769012	Purifying selection
AsGRAS05	Pepsico1_Contig13965.mrna2	TraesCS2D02G393200.1	0.795935	1.02142	0.779244	Purifying selection
AsGRAS05	Pepsico1_Contig13965.mrna2	TraesCSU02G014000.1	0.923437	1.2866	0.717734	Purifying selection
AsGRAS05	Pepsico1_Contig13965.mrna2	TraesCS4A02G176200.1	0.866304	1.52612	0.56765	Purifying selection
AsGRAS05	Pepsico1_Contig13965.mrna2	TraesCS2D02G460500.1	0.809299	0.969486	0.834771	Purifying selection
AsGRAS05	Pepsico1_Contig13965.mrna2	TraesCS4A02G271000.1	0.782447	0.72135	1.0847	Purifying selection
AsGRAS05	Pepsico1_Contig13965.mrna2	TraesCS4A02G482000.1	0.446769	0.819925	0.544889	Purifying selection
AsGRAS05	Pepsico1_Contig13965.mrna2	TraesCS5A02G135000.1	0.837392	0.837669	0.999669	Purifying selection
AsGRAS05	Pepsico1_Contig13965.mrna2	TraesCS4B02G141200.1	0.98842	1.45249	0.680501	Purifying selection
AsGRAS05	Pepsico1_Contig13965.mrna2	TraesCS5A02G535000.1	0.255667	0.566842	0.451037	Purifying selection
AsGRAS05	Pepsico1_Contig13965.mrna2	TraesCS2A02G194600.1	0.832531	0.859559	0.968556	Purifying selection
AsGRAS05	Pepsico1_Contig13965.mrna2	TraesCS5B02G133800.1	0.853728	0.837473	1.01941	Purifying selection
AsGRAS05	Pepsico1_Contig13965.mrna2	TraesCS2D02G095300.1	0.823445	0.937121	0.878696	Purifying selection
AsGRAS05	Pepsico1_Contig13965.mrna2	TraesCS2A02G532900.1	0.768473	1.22686	0.626374	Purifying selection
AsGRAS05	Pepsico1_Contig13965.mrna2	TraesCS4D02G135500.1	0.935546	1.3522	0.691868	Purifying selection
AsGRAS05	Pepsico1_Contig13965.mrna2	TraesCS2B02G217500.1	0.885225	1.19186	0.742724	Purifying selection
AsGRAS05	Pepsico1_Contig13965.mrna2	TraesCS4A02G260600.1	0.710396	0.851205	0.834577	Purifying selection
AsGRAS05	Pepsico1_Contig13965.mrna2	TraesCS5B02G326400.2	0.902724	2.30034	0.392431	Purifying selection
AsGRAS05	Pepsico1_Contig13965.mrna2	TraesCS2A02G096800.1	0.837397	0.992011	0.84414	Purifying selection
AsGRAS05	Pepsico1_Contig13965.mrna2	TraesCS5B02G326400.1	0.902724	2.30034	0.392431	Purifying selection
AsGRAS05	Pepsico1_Contig13965.mrna2	TraesCS3A02G360300.1	0.858215	1.68225	0.510158	Purifying selection
AsGRAS05	Pepsico1_Contig13965.mrna2	TraesCS4A02G430600.1	0.77163	0.724305	1.06534	Purifying selection
AsGRAS05	Pepsico1_Contig13965.mrna2	TraesCS4D02G338800.1	0.757322	1.03877	0.729054	Purifying selection
AsGRAS05	Pepsico1_Contig13965.mrna2	TraesCS7A02G059000.1	0.746182	0.807091	0.924533	Purifying selection
AsGRAS05	Pepsico1_Contig13965.mrna2	TraesCS4D02G110800.2	0.832094	1.61405	0.515533	Purifying selection
AsGRAS05	Pepsico1_Contig13965.mrna2	TraesCS2B02G413500.1	0.80242	1.16053	0.691423	Purifying selection
AsGRAS05	Pepsico1_Contig13965.mrna2	TraesCS2A02G460200.1	0.808229	0.906493	0.891599	Purifying selection
AsGRAS05	Pepsico1_Contig13965.mrna2	TraesCS5D02G092000.1	0.86245	1.41239	0.610633	Purifying selection
AsGRAS05	Pepsico1_Contig13965.mrna2	TraesCS4B02G124000.1	0.80534	1.20027	0.670969	Purifying selection
AsGRAS05	Pepsico1_Contig13965.mrna2	TraesCS4D02G360200.1	0.253575	0.547849	0.462855	Purifying selection
AsGRAS05	Pepsico1_Contig13965.mrna2	TraesCS1A02G209400.1	0.0546789	0.269444	0.202933	Purifying selection
AsGRAS05	Pepsico1_Contig13965.mrna2	TraesCS7D02G011400.1	0.430062	0.8438	0.509673	Purifying selection
AsGRAS05	Pepsico1_Contig13965.mrna2	TraesCS5D02G494900.1	0.946108	1.44586	0.654357	Purifying selection
AsGRAS05	Pepsico1_Contig13965.mrna2	TraesCS1D02G303500.1	0.762366	0.974206	0.782551	Purifying selection
AsGRAS05	Pepsico1_Contig13965.mrna2	TraesCS4D02G136100.1	0.876566	1.50316	0.58315	Purifying selection
AsGRAS05	Pepsico1_Contig13965.mrna2	TraesCS5A02G144000.1	0.818225	1.0021	0.816511	Purifying selection
AsGRAS05	Pepsico1_Contig13965.mrna2	TraesCS4B02G054000.1	0.705482	0.844248	0.835633	Purifying selection
AsGRAS05	Pepsico1_Contig13965.mrna2	TraesCS2D02G534700.1	0.75014	1.37021	0.547464	Purifying selection
AsGRAS05	Pepsico1_Contig13965.mrna2	TraesCS3A02G392400.1	0.859974	1.18059	0.728425	Purifying selection
AsGRAS05	Pepsico1_Contig13965.mrna2	TraesCS4B02G113300.1	0.763706	1.98494	0.384751	Purifying selection
AsGRAS05	Pepsico1_Contig13965.mrna2	TraesCS7A02G014200.1	0.465993	0.812406	0.573595	Purifying selection
AsGRAS05	Pepsico1_Contig13965.mrna2	TraesCS4D02G136300.1	0.89617	1.47784	0.606406	Purifying selection
AsGRAS05	Pepsico1_Contig13965.mrna2	TraesCS3D02G220100.1	0.753758	1.06912	0.705027	Purifying selection
AsGRAS05	Pepsico1_Contig13965.mrna2	TraesCS1B02G223400.1	0.0611989	0.286588	0.213543	Purifying selection
AsGRAS05	Pepsico1_Contig13965.mrna2	TraesCS1B02G314500.1	0.70419	0.881953	0.798444	Purifying selection
AsGRAS05	Pepsico1_Contig13965.mrna2	TraesCS4A02G176500.1	0.941239	1.53017	0.61512	Purifying selection
AsGRAS05	Pepsico1_Contig13965.mrna2	TraesCS3D02G220100.3	0.751411	0.997305	0.753441	Purifying selection
AsGRAS05	Pepsico1_Contig13965.mrna2	TraesCS3D02G220100.2	0.759473	0.966238	0.78601	Purifying selection
AsGRAS05	Pepsico1_Contig13965.mrna2	TraesCS4D02G332000.1	0.985338	1.29998	0.757965	Purifying selection
AsGRAS05	Pepsico1_Contig13965.mrna2	TraesCS4D02G110800.1	0.804446	1.98367	0.405534	Purifying selection
AsGRAS05	Pepsico1_Contig13965.mrna2	TraesCS3D02G354100.1	0.919649	2.4743	0.371681	Purifying selection
AsGRAS05	Pepsico1_Contig13965.mrna2	TraesCS3B02G535100.1	0.778705	0.902885	0.862463	Purifying selection
AsGRAS05	Pepsico1_Contig13965.mrna2	TraesCS1A02G319700.1	0.877126	0.917117	0.956395	Purifying selection
AsGRAS05	Pepsico1_Contig13965.mrna2	TraesCS6A02G159500.1	0.832718	0.825644	1.00857	Purifying selection
AsGRAS05	Pepsico1_Contig13965.mrna2	TraesCS2A02G192600.1	0.865927	0.930102	0.931002	Purifying selection
AsGRAS05	Pepsico1_Contig13965.mrna2	TraesCS4B02G215700.1	0.897775	0.98722	0.909397	Purifying selection
AsGRAS05	Pepsico1_Contig13965.mrna2	TraesCS3D02G385400.1	0.863642	1.1286	0.765233	Purifying selection
AsGRAS05	Pepsico1_Contig13965.mrna2	TraesCS6D02G229400.1	0.37976	1.36206	0.278813	Purifying selection
AsGRAS05	Pepsico1_Contig13965.mrna2	TraesCS7D02G053600.1	0.789277	0.747045	1.05653	Purifying selection
AsGRAS05	Pepsico1_Contig13965.mrna2	TraesCS5A02G511900.1	0.778612	0.997574	0.780506	Purifying selection
AsGRAS05	Pepsico1_Contig13965.mrna2	TraesCS2A02G189600.1	0.871232	0.994749	0.875831	Purifying selection
AsGRAS05	Pepsico1_Contig13965.mrna2	TraesCS5B02G326100.1	0.904231	2.73537	0.33057	Purifying selection
AsGRAS05	Pepsico1_Contig13965.mrna2	TraesCS4B02G043100.1	0.753955	0.854912	0.881909	Purifying selection
AsGRAS05	Pepsico1_Contig13965.mrna2	TraesCS7B02G078300.1	0.81055	0.985563	0.822424	Purifying selection
AsGRAS05	Pepsico1_Contig13965.mrna2	TraesCS4A02G176600.1	0.860204	1.40256	0.613311	Purifying selection
AsGRAS05	Pepsico1_Contig13965.mrna2	TraesCS2A02G214400.1	0.909473	2.05285	0.443029	Purifying selection
AsGRAS05	Pepsico1_Contig13965.mrna2	TraesCS4A02G176300.1	0.958245	1.09205	0.877474	Purifying selection
AsGRAS05	Pepsico1_Contig13965.mrna2	TraesCS4D02G136500.1	0.898838	1.52852	0.588043	Purifying selection
AsGRAS05	Pepsico1_Contig13965.mrna2	TraesCS3B02G424500.1	0.855654	1.10991	0.770924	Purifying selection
AsGRAS05	Pepsico1_Contig13965.mrna2	TraesCS6B02G277400.1	0.389027	1.51308	0.25711	Purifying selection
AsGRAS05	Pepsico1_Contig13965.mrna2	TraesCS2B02G239400.1	0.900343	2.14753	0.419245	Purifying selection
AsGRAS05	Pepsico1_Contig13965.mrna2	TraesCS2B02G228000.1	0.759031	0.771484	0.983858	Purifying selection
AsGRAS05	Pepsico1_Contig13965.mrna2	TraesCS5D02G148000.1	0.762525	0.964186	0.790848	Purifying selection
AsGRAS05	Pepsico1_Contig13965.mrna2	TraesCS6D02G055100.1	0.807678	1.0512	0.768338	Purifying selection
AsGRAS05	Pepsico1_Contig13965.mrna2	TraesCS4B02G141300.1	0.911822	1.39793	0.652267	Purifying selection
AsGRAS05	Pepsico1_Contig13965.mrna2	TraesCS1D02G319500.1	0.81442	0.886495	0.918696	Purifying selection
AsGRAS05	Pepsico1_Contig13965.mrna2	TraesCS3D02G482600.1	0.762211	0.93628	0.814085	Purifying selection
AsGRAS05	Pepsico1_Contig13965.mrna2	TraesCS2B02G214600.1	0.839014	0.931124	0.901077	Purifying selection
AsGRAS05	Pepsico1_Contig13965.mrna2	TraesCS4D02G136000.1	0.887095	1.57915	0.561755	Purifying selection
AsGRAS05	Pepsico1_Contig13965.mrna2	TraesCS1B02G332000.1	0.833815	0.913968	0.912302	Purifying selection
AsGRAS05	Pepsico1_Contig13965.mrna2	TraesCS5A02G481300.1	0.983159	1.49444	0.657876	Purifying selection
AsGRAS05	Pepsico1_Contig13965.mrna2	TraesCS2A02G200700.1	0.770017	0.848084	0.907949	Purifying selection
AsGRAS05	Pepsico1_Contig13965.mrna2	TraesCS7B02G285500.1	0.827621	0.978039	0.846204	Purifying selection
[truncated: 2,810 more rows]

## Sheet: As.Hv
Table S5 One-to-one orthologous relationships between the GRAS gene members in Avena Sativa and Hordeum vulgare
[truncated: 1,085 more rows]

[truncated: 3 more sheets: As.Si, As.Sv, As.Ec]
