# Supplementary material for: Genome-wide identification and characterization of abiotic stress responsive GRAS family genes in oat (Avena sativa)
Source: PeerJ. 2023 May 9;11:e15370. doi: 10.7717/peerj.15370 (PMC10178225; doi:10.7717/peerj.15370)
Supplement: Supplemental Information 6 [file peerj-11-15370-s006.xlsx]

## Sheet: Sheet1
Table S6 Cis-element analyses of the AsGRAS gene promoter regions.
Gene name	Gene ID	Starting postion (bp)	Ending postion (bp)	Predicted Cis-element
AsGRAS05	Pepsico1_Contig13965.mrna2	202	248	light responsiveness
AsGRAS05	Pepsico1_Contig13965.mrna2	479	525	light responsive element
AsGRAS05	Pepsico1_Contig13965.mrna2	1011	1057	meristem expression
AsGRAS05	Pepsico1_Contig13965.mrna2	1569	1615	meristem expression
AsGRAS05	Pepsico1_Contig13965.mrna2	1669	1715	meristem expression
AsGRAS05	Pepsico1_Contig13965.mrna2	936	982	MYB binding site involved in drought-inducibility
AsGRAS05	Pepsico1_Contig13965.mrna2	408	459	light responsive element
AsGRAS05	Pepsico1_Contig13965.mrna2	50	96	low-temperature responsiveness
AsGRAS05	Pepsico1_Contig13965.mrna2	913	959	low-temperature responsiveness
AsGRAS05	Pepsico1_Contig13965.mrna2	311	356	MeJA-responsiveness
AsGRAS05	Pepsico1_Contig13965.mrna2	760	805	MeJA-responsiveness
AsGRAS05	Pepsico1_Contig13965.mrna2	781	826	MeJA-responsiveness
AsGRAS05	Pepsico1_Contig13965.mrna2	42	87	abscisic acid responsiveness
AsGRAS05	Pepsico1_Contig13965.mrna2	239	284	abscisic acid responsiveness
AsGRAS05	Pepsico1_Contig13965.mrna2	728	775	abscisic acid responsiveness
AsGRAS05	Pepsico1_Contig13965.mrna2	670	717	light responsive element
AsGRAS05	Pepsico1_Contig13965.mrna2	1561	1608	light responsive element
AsGRAS05	Pepsico1_Contig13965.mrna2	1605	1652	light responsive element
AsGRAS05	Pepsico1_Contig13965.mrna2	1611	1658	light responsive element
AsGRAS05	Pepsico1_Contig13965.mrna2	1617	1664	light responsive element
AsGRAS05	Pepsico1_Contig13965.mrna2	1623	1670	light responsive element
AsGRAS05	Pepsico1_Contig13965.mrna2	1430	1476	light responsiveness
AsGRAS05	Pepsico1_Contig13965.mrna2	1971	2017	anoxic specific inducibility
AsGRAS05	Pepsico1_Contig13965.mrna2	311	356	MeJA-responsiveness
AsGRAS05	Pepsico1_Contig13965.mrna2	760	805	MeJA-responsiveness
AsGRAS05	Pepsico1_Contig13965.mrna2	781	826	MeJA-responsiveness
AsGRAS05	Pepsico1_Contig13965.mrna2	658	706	conserved DNA module involved in light responsiveness
AsGRAS05	Pepsico1_Contig13965.mrna2	317	364	MYB binding site involved in light responsiveness
AsGRAS05	Pepsico1_Contig13965.mrna2	305	354	defense and stress responsiveness
AsGRAS05	Pepsico1_Contig13965.mrna2	41	87	light responsiveness
AsGRAS05	Pepsico1_Contig13965.mrna2	170	216	light responsiveness
AsGRAS05	Pepsico1_Contig13965.mrna2	239	285	light responsiveness
AsGRAS05	Pepsico1_Contig13965.mrna2	1466	1513	gibberellin-responsive element
AsGRAS12	Pepsico1_Contig14278.mrna1	936	982	MYB binding site involved in drought-inducibility
AsGRAS12	Pepsico1_Contig14278.mrna1	1011	1057	meristem expression
AsGRAS12	Pepsico1_Contig14278.mrna1	1569	1615	meristem expression
AsGRAS12	Pepsico1_Contig14278.mrna1	1669	1715	meristem expression
AsGRAS12	Pepsico1_Contig14278.mrna1	408	459	light responsive element
AsGRAS12	Pepsico1_Contig14278.mrna1	202	248	light responsiveness
AsGRAS12	Pepsico1_Contig14278.mrna1	479	525	light responsive element
AsGRAS12	Pepsico1_Contig14278.mrna1	311	356	MeJA-responsiveness
AsGRAS12	Pepsico1_Contig14278.mrna1	760	805	MeJA-responsiveness
AsGRAS12	Pepsico1_Contig14278.mrna1	781	826	MeJA-responsiveness
AsGRAS12	Pepsico1_Contig14278.mrna1	50	96	low-temperature responsiveness
AsGRAS12	Pepsico1_Contig14278.mrna1	913	959	low-temperature responsiveness
AsGRAS12	Pepsico1_Contig14278.mrna1	42	87	abscisic acid responsiveness
AsGRAS12	Pepsico1_Contig14278.mrna1	239	284	abscisic acid responsiveness
AsGRAS12	Pepsico1_Contig14278.mrna1	728	775	abscisic acid responsiveness
AsGRAS12	Pepsico1_Contig14278.mrna1	670	717	light responsive element
AsGRAS12	Pepsico1_Contig14278.mrna1	1561	1608	light responsive element
AsGRAS12	Pepsico1_Contig14278.mrna1	1605	1652	light responsive element
AsGRAS12	Pepsico1_Contig14278.mrna1	1611	1658	light responsive element
AsGRAS12	Pepsico1_Contig14278.mrna1	1617	1664	light responsive element
AsGRAS12	Pepsico1_Contig14278.mrna1	1623	1670	light responsive element
AsGRAS12	Pepsico1_Contig14278.mrna1	311	356	MeJA-responsiveness
AsGRAS12	Pepsico1_Contig14278.mrna1	760	805	MeJA-responsiveness
AsGRAS12	Pepsico1_Contig14278.mrna1	781	826	MeJA-responsiveness
AsGRAS12	Pepsico1_Contig14278.mrna1	1971	2017	anoxic specific inducibility
AsGRAS12	Pepsico1_Contig14278.mrna1	1430	1476	light responsiveness
AsGRAS12	Pepsico1_Contig14278.mrna1	317	364	MYB binding site involved in light responsiveness
AsGRAS12	Pepsico1_Contig14278.mrna1	658	706	conserved DNA module involved in light responsiveness
AsGRAS12	Pepsico1_Contig14278.mrna1	41	87	light responsiveness
AsGRAS12	Pepsico1_Contig14278.mrna1	170	216	light responsiveness
AsGRAS12	Pepsico1_Contig14278.mrna1	239	285	light responsiveness
AsGRAS12	Pepsico1_Contig14278.mrna1	1466	1513	gibberellin-responsive element
AsGRAS12	Pepsico1_Contig14278.mrna1	305	354	defense and stress responsiveness
AsGRAS13	Pepsico1_Contig14835.mrna1	657	705	conserved DNA module involved in light responsiveness
AsGRAS13	Pepsico1_Contig14835.mrna1	154	199	MeJA-responsiveness
AsGRAS13	Pepsico1_Contig14835.mrna1	755	800	MeJA-responsiveness
AsGRAS13	Pepsico1_Contig14835.mrna1	771	816	MeJA-responsiveness
AsGRAS13	Pepsico1_Contig14835.mrna1	1484	1530	light responsiveness
AsGRAS13	Pepsico1_Contig14835.mrna1	1931	1977	auxin-responsive element
AsGRAS13	Pepsico1_Contig14835.mrna1	611	658	gibberellin-responsive element
AsGRAS13	Pepsico1_Contig14835.mrna1	1520	1567	gibberellin-responsive element
AsGRAS13	Pepsico1_Contig14835.mrna1	152	198	light responsiveness
AsGRAS13	Pepsico1_Contig14835.mrna1	1281	1327	light responsiveness
AsGRAS13	Pepsico1_Contig14835.mrna1	170	216	anaerobic induction
AsGRAS13	Pepsico1_Contig14835.mrna1	154	199	MeJA-responsiveness
AsGRAS13	Pepsico1_Contig14835.mrna1	755	800	MeJA-responsiveness
AsGRAS13	Pepsico1_Contig14835.mrna1	771	816	MeJA-responsiveness
AsGRAS13	Pepsico1_Contig14835.mrna1	852	898	low-temperature responsiveness
AsGRAS13	Pepsico1_Contig14835.mrna1	950	996	low-temperature responsiveness
AsGRAS13	Pepsico1_Contig14835.mrna1	1053	1099	meristem expression
AsGRAS13	Pepsico1_Contig14835.mrna1	1604	1650	meristem expression
AsGRAS13	Pepsico1_Contig14835.mrna1	1666	1712	meristem expression
AsGRAS13	Pepsico1_Contig14835.mrna1	1171	1218	light responsive element
AsGRAS13	Pepsico1_Contig14835.mrna1	1631	1678	light responsive element
AsGRAS13	Pepsico1_Contig14835.mrna1	152	197	abscisic acid responsiveness
AsGRAS13	Pepsico1_Contig14835.mrna1	1282	1327	abscisic acid responsiveness
AsGRAS25	Pepsico1_Contig17438.mrna1	1728	1777	light responsive element
AsGRAS25	Pepsico1_Contig17438.mrna1	1525	1570	MeJA-responsiveness
AsGRAS25	Pepsico1_Contig17438.mrna1	1554	1599	MeJA-responsiveness
AsGRAS25	Pepsico1_Contig17438.mrna1	1713	1758	MeJA-responsiveness
AsGRAS25	Pepsico1_Contig17438.mrna1	663	709	low-temperature responsiveness
AsGRAS25	Pepsico1_Contig17438.mrna1	704	750	low-temperature responsiveness
AsGRAS25	Pepsico1_Contig17438.mrna1	1387	1433	low-temperature responsiveness
AsGRAS25	Pepsico1_Contig17438.mrna1	1010	1056	conserved DNA module involved in light responsiveness
AsGRAS25	Pepsico1_Contig17438.mrna1	1090	1136	conserved DNA module involved in light responsiveness
AsGRAS25	Pepsico1_Contig17438.mrna1	557	603	MYB binding site involved in drought-inducibility
AsGRAS25	Pepsico1_Contig17438.mrna1	838	884	MYB binding site involved in drought-inducibility
AsGRAS25	Pepsico1_Contig17438.mrna1	1961	2008	light responsive element
AsGRAS25	Pepsico1_Contig17438.mrna1	441	487	light responsiveness
AsGRAS25	Pepsico1_Contig17438.mrna1	846	892	light responsiveness
AsGRAS25	Pepsico1_Contig17438.mrna1	1196	1245	salicylic acid responsiveness
AsGRAS25	Pepsico1_Contig17438.mrna1	441	487	abscisic acid responsiveness
AsGRAS25	Pepsico1_Contig17438.mrna1	442	487	abscisic acid responsiveness
AsGRAS25	Pepsico1_Contig17438.mrna1	484	529	abscisic acid responsiveness
AsGRAS25	Pepsico1_Contig17438.mrna1	846	891	abscisic acid responsiveness
AsGRAS25	Pepsico1_Contig17438.mrna1	1675	1722	abscisic acid responsiveness
AsGRAS25	Pepsico1_Contig17438.mrna1	1700	1745	abscisic acid responsiveness
AsGRAS25	Pepsico1_Contig17438.mrna1	1525	1570	MeJA-responsiveness
AsGRAS25	Pepsico1_Contig17438.mrna1	1554	1599	MeJA-responsiveness
AsGRAS25	Pepsico1_Contig17438.mrna1	1713	1758	MeJA-responsiveness
AsGRAS25	Pepsico1_Contig17438.mrna1	644	695	endosperm-specific negative expression
AsGRAS25	Pepsico1_Contig17438.mrna1	1026	1074	light responsive element
AsGRAS25	Pepsico1_Contig17438.mrna1	72	118	light responsiveness
AsGRAS25	Pepsico1_Contig17438.mrna1	146	192	light responsiveness
AsGRAS25	Pepsico1_Contig17438.mrna1	172	218	light responsiveness
AsGRAS25	Pepsico1_Contig17438.mrna1	439	488	light responsiveness
AsGRAS25	Pepsico1_Contig17438.mrna1	441	487	light responsiveness
AsGRAS25	Pepsico1_Contig17438.mrna1	484	530	light responsiveness
AsGRAS25	Pepsico1_Contig17438.mrna1	1699	1745	light responsiveness
AsGRAS22	Pepsico1_Contig17925.mrna1	332	377	abscisic acid responsiveness
AsGRAS22	Pepsico1_Contig17925.mrna1	764	811	abscisic acid responsiveness
AsGRAS22	Pepsico1_Contig17925.mrna1	954	999	abscisic acid responsiveness
AsGRAS22	Pepsico1_Contig17925.mrna1	1820	1866	low-temperature responsiveness
AsGRAS22	Pepsico1_Contig17925.mrna1	806	851	MeJA-responsiveness
AsGRAS22	Pepsico1_Contig17925.mrna1	956	1001	MeJA-responsiveness
AsGRAS22	Pepsico1_Contig17925.mrna1	1294	1339	MeJA-responsiveness
AsGRAS22	Pepsico1_Contig17925.mrna1	1919	1964	MeJA-responsiveness
AsGRAS22	Pepsico1_Contig17925.mrna1	1703	1749	light responsive element
AsGRAS22	Pepsico1_Contig17925.mrna1	1696	1742	MYB binding site involved in drought-inducibility
AsGRAS22	Pepsico1_Contig17925.mrna1	597	648	light responsive element
AsGRAS22	Pepsico1_Contig17925.mrna1	1089	1135	conserved DNA module involved in light responsiveness
AsGRAS22	Pepsico1_Contig17925.mrna1	1639	1685	conserved DNA module involved in light responsiveness
AsGRAS22	Pepsico1_Contig17925.mrna1	974	1020	cis-acting regulatory element
AsGRAS22	Pepsico1_Contig17925.mrna1	211	257	anaerobic induction
AsGRAS22	Pepsico1_Contig17925.mrna1	50	97	gibberellin-responsiveness
AsGRAS22	Pepsico1_Contig17925.mrna1	200	246	light responsiveness
AsGRAS22	Pepsico1_Contig17925.mrna1	330	378	light responsiveness
AsGRAS22	Pepsico1_Contig17925.mrna1	331	377	light responsiveness
AsGRAS22	Pepsico1_Contig17925.mrna1	954	1000	light responsiveness
AsGRAS22	Pepsico1_Contig17925.mrna1	990	1039	conserved DNA module involved in light responsiveness
AsGRAS22	Pepsico1_Contig17925.mrna1	806	851	MeJA-responsiveness
AsGRAS22	Pepsico1_Contig17925.mrna1	956	1001	MeJA-responsiveness
AsGRAS22	Pepsico1_Contig17925.mrna1	1294	1339	MeJA-responsiveness
AsGRAS22	Pepsico1_Contig17925.mrna1	1919	1964	MeJA-responsiveness
AsGRAS22	Pepsico1_Contig17925.mrna1	1475	1521	anoxic specific inducibility
AsGRAS17	Pepsico1_Contig18352.mrna1	491	536	abscisic acid responsiveness
AsGRAS17	Pepsico1_Contig18352.mrna1	758	807	abscisic acid responsiveness
AsGRAS17	Pepsico1_Contig18352.mrna1	996	1043	endosperm expression
AsGRAS17	Pepsico1_Contig18352.mrna1	1765	1812	light responsive element
AsGRAS17	Pepsico1_Contig18352.mrna1	1949	1998	salicylic acid responsiveness
AsGRAS17	Pepsico1_Contig18352.mrna1	10	56	conserved DNA module involved in light responsiveness
AsGRAS17	Pepsico1_Contig18352.mrna1	1456	1502	conserved DNA module involved in light responsiveness
AsGRAS17	Pepsico1_Contig18352.mrna1	1008	1054	MYB binding site involved in drought-inducibility
AsGRAS17	Pepsico1_Contig18352.mrna1	1505	1551	MYB binding site involved in drought-inducibility
AsGRAS17	Pepsico1_Contig18352.mrna1	810	856	meristem expression
AsGRAS17	Pepsico1_Contig18352.mrna1	1015	1060	MeJA-responsiveness
AsGRAS17	Pepsico1_Contig18352.mrna1	1237	1282	MeJA-responsiveness
AsGRAS17	Pepsico1_Contig18352.mrna1	257	303	low-temperature responsiveness
AsGRAS17	Pepsico1_Contig18352.mrna1	1328	1379	MYB binding site involved in flavonoid biosynthetic genes regulation
AsGRAS17	Pepsico1_Contig18352.mrna1	1947	1995	light responsive element
AsGRAS17	Pepsico1_Contig18352.mrna1	1391	1438	gibberellin-responsive element
AsGRAS17	Pepsico1_Contig18352.mrna1	1470	1517	gibberellin-responsive element
AsGRAS17	Pepsico1_Contig18352.mrna1	491	537	light responsiveness
AsGRAS17	Pepsico1_Contig18352.mrna1	949	997	module for light response
AsGRAS17	Pepsico1_Contig18352.mrna1	1179	1227	module for light response
AsGRAS17	Pepsico1_Contig18352.mrna1	609	655	anaerobic induction
AsGRAS17	Pepsico1_Contig18352.mrna1	1331	1377	anaerobic induction
AsGRAS17	Pepsico1_Contig18352.mrna1	1461	1507	anaerobic induction
AsGRAS17	Pepsico1_Contig18352.mrna1	1034	1081	gibberellin-responsive element
AsGRAS17	Pepsico1_Contig18352.mrna1	1160	1206	anoxic specific inducibility
AsGRAS17	Pepsico1_Contig18352.mrna1	1015	1060	MeJA-responsiveness
AsGRAS17	Pepsico1_Contig18352.mrna1	1237	1282	MeJA-responsiveness
AsGRAS17	Pepsico1_Contig18352.mrna1	565	611	auxin-responsive element
AsGRAS17	Pepsico1_Contig18352.mrna1	637	683	auxin-responsive element
AsGRAS17	Pepsico1_Contig18352.mrna1	646	692	auxin-responsive element
AsGRAS07	Pepsico1_Contig18352.mrna2	124	170	light responsiveness
AsGRAS07	Pepsico1_Contig18352.mrna2	216	262	light responsiveness
AsGRAS07	Pepsico1_Contig18352.mrna2	323	369	light responsiveness
AsGRAS07	Pepsico1_Contig18352.mrna2	344	390	light responsiveness
AsGRAS07	Pepsico1_Contig18352.mrna2	447	493	light responsiveness
AsGRAS07	Pepsico1_Contig18352.mrna2	1947	1995	light responsive element
AsGRAS07	Pepsico1_Contig18352.mrna2	1395	1442	gibberellin-responsive element
AsGRAS07	Pepsico1_Contig18352.mrna2	1474	1521	gibberellin-responsive element
AsGRAS07	Pepsico1_Contig18352.mrna2	1332	1383	MYB binding site involved in flavonoid biosynthetic genes regulation
AsGRAS07	Pepsico1_Contig18352.mrna2	1335	1381	anaerobic induction
AsGRAS07	Pepsico1_Contig18352.mrna2	1465	1511	anaerobic induction
AsGRAS07	Pepsico1_Contig18352.mrna2	1183	1231	module for light response
AsGRAS07	Pepsico1_Contig18352.mrna2	896	944	light responsive element
AsGRAS07	Pepsico1_Contig18352.mrna2	138	184	cis-acting regulatory element
AsGRAS07	Pepsico1_Contig18352.mrna2	1038	1085	gibberellin-responsive element
AsGRAS07	Pepsico1_Contig18352.mrna2	218	263	MeJA-responsiveness
AsGRAS07	Pepsico1_Contig18352.mrna2	1019	1064	MeJA-responsiveness
AsGRAS07	Pepsico1_Contig18352.mrna2	1241	1286	MeJA-responsiveness
AsGRAS07	Pepsico1_Contig18352.mrna2	1164	1210	anoxic specific inducibility
AsGRAS07	Pepsico1_Contig18352.mrna2	755	802	MYB binding site involved in light responsiveness
AsGRAS07	Pepsico1_Contig18352.mrna2	1000	1047	endosperm expression
AsGRAS07	Pepsico1_Contig18352.mrna2	216	261	abscisic acid responsiveness
AsGRAS07	Pepsico1_Contig18352.mrna2	324	369	abscisic acid responsiveness
AsGRAS07	Pepsico1_Contig18352.mrna2	354	403	abscisic acid responsiveness
AsGRAS07	Pepsico1_Contig18352.mrna2	94	142	seed-specific regulation
AsGRAS07	Pepsico1_Contig18352.mrna2	1568	1617	salicylic acid responsiveness
AsGRAS07	Pepsico1_Contig18352.mrna2	1949	1998	salicylic acid responsiveness
AsGRAS07	Pepsico1_Contig18352.mrna2	1766	1813	light responsive element
AsGRAS07	Pepsico1_Contig18352.mrna2	1012	1058	MYB binding site involved in drought-inducibility
AsGRAS07	Pepsico1_Contig18352.mrna2	1509	1555	MYB binding site involved in drought-inducibility
AsGRAS07	Pepsico1_Contig18352.mrna2	1460	1506	conserved DNA module involved in light responsiveness
AsGRAS07	Pepsico1_Contig18352.mrna2	218	263	MeJA-responsiveness
AsGRAS07	Pepsico1_Contig18352.mrna2	1019	1064	MeJA-responsiveness
AsGRAS07	Pepsico1_Contig18352.mrna2	1241	1286	MeJA-responsiveness
AsGRAS11	Pepsico1_Contig19030.mrna1	42	87	abscisic acid responsiveness
AsGRAS11	Pepsico1_Contig19030.mrna1	239	284	abscisic acid responsiveness
AsGRAS11	Pepsico1_Contig19030.mrna1	728	775	abscisic acid responsiveness
AsGRAS11	Pepsico1_Contig19030.mrna1	670	717	light responsive element
AsGRAS11	Pepsico1_Contig19030.mrna1	1561	1608	light responsive element
AsGRAS11	Pepsico1_Contig19030.mrna1	1605	1652	light responsive element
AsGRAS11	Pepsico1_Contig19030.mrna1	1611	1658	light responsive element
AsGRAS11	Pepsico1_Contig19030.mrna1	1617	1664	light responsive element
AsGRAS11	Pepsico1_Contig19030.mrna1	1623	1670	light responsive element
AsGRAS11	Pepsico1_Contig19030.mrna1	408	459	light responsive element
AsGRAS11	Pepsico1_Contig19030.mrna1	1011	1057	meristem expression
AsGRAS11	Pepsico1_Contig19030.mrna1	1569	1615	meristem expression
AsGRAS11	Pepsico1_Contig19030.mrna1	1669	1715	meristem expression
AsGRAS11	Pepsico1_Contig19030.mrna1	936	982	MYB binding site involved in drought-inducibility
AsGRAS11	Pepsico1_Contig19030.mrna1	479	525	light responsive element
AsGRAS11	Pepsico1_Contig19030.mrna1	202	248	light responsiveness
AsGRAS11	Pepsico1_Contig19030.mrna1	311	356	MeJA-responsiveness
AsGRAS11	Pepsico1_Contig19030.mrna1	760	805	MeJA-responsiveness
AsGRAS11	Pepsico1_Contig19030.mrna1	781	826	MeJA-responsiveness
AsGRAS11	Pepsico1_Contig19030.mrna1	50	96	low-temperature responsiveness
AsGRAS11	Pepsico1_Contig19030.mrna1	913	959	low-temperature responsiveness
AsGRAS11	Pepsico1_Contig19030.mrna1	1466	1513	gibberellin-responsive element
AsGRAS11	Pepsico1_Contig19030.mrna1	41	87	light responsiveness
AsGRAS11	Pepsico1_Contig19030.mrna1	170	216	light responsiveness
AsGRAS11	Pepsico1_Contig19030.mrna1	239	285	light responsiveness
AsGRAS11	Pepsico1_Contig19030.mrna1	305	354	defense and stress responsiveness
AsGRAS11	Pepsico1_Contig19030.mrna1	311	356	MeJA-responsiveness
AsGRAS11	Pepsico1_Contig19030.mrna1	760	805	MeJA-responsiveness
AsGRAS11	Pepsico1_Contig19030.mrna1	781	826	MeJA-responsiveness
AsGRAS11	Pepsico1_Contig19030.mrna1	1971	2017	anoxic specific inducibility
AsGRAS11	Pepsico1_Contig19030.mrna1	1430	1476	light responsiveness
AsGRAS11	Pepsico1_Contig19030.mrna1	317	364	MYB binding site involved in light responsiveness
AsGRAS11	Pepsico1_Contig19030.mrna1	658	706	conserved DNA module involved in light responsiveness
AsGRAS08	Pepsico1_Contig25100.mrna1	305	354	defense and stress responsiveness
AsGRAS08	Pepsico1_Contig25100.mrna1	41	87	light responsiveness
AsGRAS08	Pepsico1_Contig25100.mrna1	170	216	light responsiveness
AsGRAS08	Pepsico1_Contig25100.mrna1	239	285	light responsiveness
AsGRAS08	Pepsico1_Contig25100.mrna1	1466	1513	gibberellin-responsive element
AsGRAS08	Pepsico1_Contig25100.mrna1	1430	1476	light responsiveness
AsGRAS08	Pepsico1_Contig25100.mrna1	1971	2017	anoxic specific inducibility
AsGRAS08	Pepsico1_Contig25100.mrna1	311	356	MeJA-responsiveness
AsGRAS08	Pepsico1_Contig25100.mrna1	760	805	MeJA-responsiveness
AsGRAS08	Pepsico1_Contig25100.mrna1	781	826	MeJA-responsiveness
AsGRAS08	Pepsico1_Contig25100.mrna1	658	706	conserved DNA module involved in light responsiveness
AsGRAS08	Pepsico1_Contig25100.mrna1	317	364	MYB binding site involved in light responsiveness
AsGRAS08	Pepsico1_Contig25100.mrna1	42	87	abscisic acid responsiveness
AsGRAS08	Pepsico1_Contig25100.mrna1	239	284	abscisic acid responsiveness
AsGRAS08	Pepsico1_Contig25100.mrna1	728	775	abscisic acid responsiveness
AsGRAS08	Pepsico1_Contig25100.mrna1	670	717	light responsive element
AsGRAS08	Pepsico1_Contig25100.mrna1	1561	1608	light responsive element
AsGRAS08	Pepsico1_Contig25100.mrna1	1605	1652	light responsive element
AsGRAS08	Pepsico1_Contig25100.mrna1	1611	1658	light responsive element
AsGRAS08	Pepsico1_Contig25100.mrna1	1617	1664	light responsive element
AsGRAS08	Pepsico1_Contig25100.mrna1	1623	1670	light responsive element
AsGRAS08	Pepsico1_Contig25100.mrna1	202	248	light responsiveness
AsGRAS08	Pepsico1_Contig25100.mrna1	479	525	light responsive element
AsGRAS08	Pepsico1_Contig25100.mrna1	936	982	MYB binding site involved in drought-inducibility
AsGRAS08	Pepsico1_Contig25100.mrna1	1011	1057	meristem expression
AsGRAS08	Pepsico1_Contig25100.mrna1	1569	1615	meristem expression
AsGRAS08	Pepsico1_Contig25100.mrna1	1669	1715	meristem expression
AsGRAS08	Pepsico1_Contig25100.mrna1	408	459	light responsive element
AsGRAS08	Pepsico1_Contig25100.mrna1	50	96	low-temperature responsiveness
AsGRAS08	Pepsico1_Contig25100.mrna1	913	959	low-temperature responsiveness
AsGRAS08	Pepsico1_Contig25100.mrna1	311	356	MeJA-responsiveness
AsGRAS08	Pepsico1_Contig25100.mrna1	760	805	MeJA-responsiveness
AsGRAS08	Pepsico1_Contig25100.mrna1	781	826	MeJA-responsiveness
AsGRAS04	Pepsico1_Contig26725.mrna2	305	354	defense and stress responsiveness
AsGRAS04	Pepsico1_Contig26725.mrna2	41	87	light responsiveness
AsGRAS04	Pepsico1_Contig26725.mrna2	170	216	light responsiveness
AsGRAS04	Pepsico1_Contig26725.mrna2	239	285	light responsiveness
AsGRAS04	Pepsico1_Contig26725.mrna2	1466	1513	gibberellin-responsive element
AsGRAS04	Pepsico1_Contig26725.mrna2	658	706	conserved DNA module involved in light responsiveness
AsGRAS04	Pepsico1_Contig26725.mrna2	317	364	MYB binding site involved in light responsiveness
AsGRAS04	Pepsico1_Contig26725.mrna2	1430	1476	light responsiveness
AsGRAS04	Pepsico1_Contig26725.mrna2	1971	2017	anoxic specific inducibility
AsGRAS04	Pepsico1_Contig26725.mrna2	311	356	MeJA-responsiveness
AsGRAS04	Pepsico1_Contig26725.mrna2	760	805	MeJA-responsiveness
AsGRAS04	Pepsico1_Contig26725.mrna2	781	826	MeJA-responsiveness
AsGRAS04	Pepsico1_Contig26725.mrna2	670	717	light responsive element
AsGRAS04	Pepsico1_Contig26725.mrna2	1561	1608	light responsive element
AsGRAS04	Pepsico1_Contig26725.mrna2	1605	1652	light responsive element
AsGRAS04	Pepsico1_Contig26725.mrna2	1611	1658	light responsive element
AsGRAS04	Pepsico1_Contig26725.mrna2	1617	1664	light responsive element
AsGRAS04	Pepsico1_Contig26725.mrna2	1623	1670	light responsive element
AsGRAS04	Pepsico1_Contig26725.mrna2	42	87	abscisic acid responsiveness
AsGRAS04	Pepsico1_Contig26725.mrna2	239	284	abscisic acid responsiveness
AsGRAS04	Pepsico1_Contig26725.mrna2	728	775	abscisic acid responsiveness
AsGRAS04	Pepsico1_Contig26725.mrna2	50	96	low-temperature responsiveness
AsGRAS04	Pepsico1_Contig26725.mrna2	913	959	low-temperature responsiveness
AsGRAS04	Pepsico1_Contig26725.mrna2	311	356	MeJA-responsiveness
AsGRAS04	Pepsico1_Contig26725.mrna2	760	805	MeJA-responsiveness
AsGRAS04	Pepsico1_Contig26725.mrna2	781	826	MeJA-responsiveness
AsGRAS04	Pepsico1_Contig26725.mrna2	202	248	light responsiveness
AsGRAS04	Pepsico1_Contig26725.mrna2	479	525	light responsive element
AsGRAS04	Pepsico1_Contig26725.mrna2	1011	1057	meristem expression
AsGRAS04	Pepsico1_Contig26725.mrna2	1569	1615	meristem expression
AsGRAS04	Pepsico1_Contig26725.mrna2	1669	1715	meristem expression
AsGRAS04	Pepsico1_Contig26725.mrna2	936	982	MYB binding site involved in drought-inducibility
AsGRAS04	Pepsico1_Contig26725.mrna2	408	459	light responsive element
AsGRAS14	Pepsico1_Contig27727.mrna1	152	198	light responsiveness
AsGRAS14	Pepsico1_Contig27727.mrna1	1281	1327	light responsiveness
AsGRAS14	Pepsico1_Contig27727.mrna1	1520	1567	gibberellin-responsive element
AsGRAS14	Pepsico1_Contig27727.mrna1	170	216	anaerobic induction
AsGRAS14	Pepsico1_Contig27727.mrna1	611	658	gibberellin-responsive element
AsGRAS14	Pepsico1_Contig27727.mrna1	154	199	MeJA-responsiveness
AsGRAS14	Pepsico1_Contig27727.mrna1	755	800	MeJA-responsiveness
AsGRAS14	Pepsico1_Contig27727.mrna1	771	816	MeJA-responsiveness
AsGRAS14	Pepsico1_Contig27727.mrna1	1931	1977	auxin-responsive element
AsGRAS14	Pepsico1_Contig27727.mrna1	1484	1530	light responsiveness
AsGRAS14	Pepsico1_Contig27727.mrna1	657	705	conserved DNA module involved in light responsiveness
AsGRAS14	Pepsico1_Contig27727.mrna1	152	197	abscisic acid responsiveness
AsGRAS14	Pepsico1_Contig27727.mrna1	1282	1327	abscisic acid responsiveness
AsGRAS14	Pepsico1_Contig27727.mrna1	1171	1218	light responsive element
AsGRAS14	Pepsico1_Contig27727.mrna1	1631	1678	light responsive element
AsGRAS14	Pepsico1_Contig27727.mrna1	1053	1099	meristem expression
AsGRAS14	Pepsico1_Contig27727.mrna1	1604	1650	meristem expression
AsGRAS14	Pepsico1_Contig27727.mrna1	1666	1712	meristem expression
AsGRAS14	Pepsico1_Contig27727.mrna1	154	199	MeJA-responsiveness
AsGRAS14	Pepsico1_Contig27727.mrna1	755	800	MeJA-responsiveness
AsGRAS14	Pepsico1_Contig27727.mrna1	771	816	MeJA-responsiveness
AsGRAS14	Pepsico1_Contig27727.mrna1	852	898	low-temperature responsiveness
AsGRAS14	Pepsico1_Contig27727.mrna1	950	996	low-temperature responsiveness
AsGRAS30	Pepsico1_Contig28179.mrna1	307	353	anoxic specific inducibility
AsGRAS30	Pepsico1_Contig28179.mrna1	1533	1578	MeJA-responsiveness
AsGRAS30	Pepsico1_Contig28179.mrna1	1712	1757	MeJA-responsiveness
AsGRAS30	Pepsico1_Contig28179.mrna1	42	93	endosperm-specific negative expression
AsGRAS30	Pepsico1_Contig28179.mrna1	350	396	light responsiveness
AsGRAS30	Pepsico1_Contig28179.mrna1	790	838	light responsive element
AsGRAS30	Pepsico1_Contig28179.mrna1	1698	1744	light responsiveness
AsGRAS30	Pepsico1_Contig28179.mrna1	853	902	light responsive element
AsGRAS30	Pepsico1_Contig28179.mrna1	1257	1304	gibberellin-responsiveness
AsGRAS30	Pepsico1_Contig28179.mrna1	1533	1578	MeJA-responsiveness
AsGRAS30	Pepsico1_Contig28179.mrna1	1712	1757	MeJA-responsiveness
AsGRAS30	Pepsico1_Contig28179.mrna1	851	900	light responsive element
AsGRAS30	Pepsico1_Contig28179.mrna1	1727	1776	light responsive element
AsGRAS30	Pepsico1_Contig28179.mrna1	61	107	low-temperature responsiveness
AsGRAS30	Pepsico1_Contig28179.mrna1	131	177	low-temperature responsiveness
AsGRAS30	Pepsico1_Contig28179.mrna1	1385	1431	low-temperature responsiveness
AsGRAS30	Pepsico1_Contig28179.mrna1	373	419	meristem expression
AsGRAS30	Pepsico1_Contig28179.mrna1	1045	1091	meristem expression
AsGRAS30	Pepsico1_Contig28179.mrna1	1545	1591	light responsiveness
AsGRAS30	Pepsico1_Contig28179.mrna1	1582	1628	light responsiveness
AsGRAS30	Pepsico1_Contig28179.mrna1	1051	1097	light responsive element
AsGRAS30	Pepsico1_Contig28179.mrna1	295	341	light responsiveness
AsGRAS30	Pepsico1_Contig28179.mrna1	540	589	salicylic acid responsiveness
AsGRAS30	Pepsico1_Contig28179.mrna1	1411	1458	light responsive element
AsGRAS30	Pepsico1_Contig28179.mrna1	295	340	abscisic acid responsiveness
AsGRAS30	Pepsico1_Contig28179.mrna1	1674	1721	abscisic acid responsiveness
AsGRAS30	Pepsico1_Contig28179.mrna1	1699	1744	abscisic acid responsiveness
AsGRAS01	Pepsico1_Contig29889.mrna1	670	717	light responsive element
AsGRAS01	Pepsico1_Contig29889.mrna1	1561	1608	light responsive element
AsGRAS01	Pepsico1_Contig29889.mrna1	1605	1652	light responsive element
AsGRAS01	Pepsico1_Contig29889.mrna1	1611	1658	light responsive element
AsGRAS01	Pepsico1_Contig29889.mrna1	1617	1664	light responsive element
AsGRAS01	Pepsico1_Contig29889.mrna1	1623	1670	light responsive element
AsGRAS01	Pepsico1_Contig29889.mrna1	42	87	abscisic acid responsiveness
AsGRAS01	Pepsico1_Contig29889.mrna1	239	284	abscisic acid responsiveness
AsGRAS01	Pepsico1_Contig29889.mrna1	728	775	abscisic acid responsiveness
AsGRAS01	Pepsico1_Contig29889.mrna1	50	96	low-temperature responsiveness
AsGRAS01	Pepsico1_Contig29889.mrna1	913	959	low-temperature responsiveness
AsGRAS01	Pepsico1_Contig29889.mrna1	311	356	MeJA-responsiveness
AsGRAS01	Pepsico1_Contig29889.mrna1	760	805	MeJA-responsiveness
AsGRAS01	Pepsico1_Contig29889.mrna1	781	826	MeJA-responsiveness
AsGRAS01	Pepsico1_Contig29889.mrna1	479	525	light responsive element
AsGRAS01	Pepsico1_Contig29889.mrna1	202	248	light responsiveness
AsGRAS01	Pepsico1_Contig29889.mrna1	408	459	light responsive element
AsGRAS01	Pepsico1_Contig29889.mrna1	1011	1057	meristem expression
AsGRAS01	Pepsico1_Contig29889.mrna1	1569	1615	meristem expression
AsGRAS01	Pepsico1_Contig29889.mrna1	1669	1715	meristem expression
AsGRAS01	Pepsico1_Contig29889.mrna1	936	982	MYB binding site involved in drought-inducibility
AsGRAS01	Pepsico1_Contig29889.mrna1	305	354	defense and stress responsiveness
AsGRAS01	Pepsico1_Contig29889.mrna1	1466	1513	gibberellin-responsive element
AsGRAS01	Pepsico1_Contig29889.mrna1	41	87	light responsiveness
AsGRAS01	Pepsico1_Contig29889.mrna1	170	216	light responsiveness
AsGRAS01	Pepsico1_Contig29889.mrna1	239	285	light responsiveness
AsGRAS01	Pepsico1_Contig29889.mrna1	658	706	conserved DNA module involved in light responsiveness
AsGRAS01	Pepsico1_Contig29889.mrna1	317	364	MYB binding site involved in light responsiveness
AsGRAS01	Pepsico1_Contig29889.mrna1	1430	1476	light responsiveness
AsGRAS01	Pepsico1_Contig29889.mrna1	1971	2017	anoxic specific inducibility
AsGRAS01	Pepsico1_Contig29889.mrna1	311	356	MeJA-responsiveness
AsGRAS01	Pepsico1_Contig29889.mrna1	760	805	MeJA-responsiveness
AsGRAS01	Pepsico1_Contig29889.mrna1	781	826	MeJA-responsiveness
AsGRAS21	Pepsico1_Contig29889.mrna2	254	300	light responsive element
AsGRAS21	Pepsico1_Contig29889.mrna2	707	753	MYB binding site involved in drought-inducibility
AsGRAS21	Pepsico1_Contig29889.mrna2	782	828	meristem expression
AsGRAS21	Pepsico1_Contig29889.mrna2	1592	1638	meristem expression
AsGRAS21	Pepsico1_Contig29889.mrna2	1674	1720	meristem expression
AsGRAS21	Pepsico1_Contig29889.mrna2	687	733	low-temperature responsiveness
AsGRAS21	Pepsico1_Contig29889.mrna2	104	149	MeJA-responsiveness
AsGRAS21	Pepsico1_Contig29889.mrna2	533	578	MeJA-responsiveness
AsGRAS21	Pepsico1_Contig29889.mrna2	554	599	MeJA-responsiveness
AsGRAS21	Pepsico1_Contig29889.mrna2	16	61	abscisic acid responsiveness
AsGRAS21	Pepsico1_Contig29889.mrna2	501	548	abscisic acid responsiveness
AsGRAS21	Pepsico1_Contig29889.mrna2	1106	1155	abscisic acid responsiveness
AsGRAS21	Pepsico1_Contig29889.mrna2	1108	1154	abscisic acid responsiveness
AsGRAS21	Pepsico1_Contig29889.mrna2	1109	1154	abscisic acid responsiveness
AsGRAS21	Pepsico1_Contig29889.mrna2	1108	1154	light responsiveness
AsGRAS21	Pepsico1_Contig29889.mrna2	443	490	light responsive element
AsGRAS21	Pepsico1_Contig29889.mrna2	1627	1674	light responsive element
AsGRAS21	Pepsico1_Contig29889.mrna2	1635	1682	light responsive element
AsGRAS21	Pepsico1_Contig29889.mrna2	1463	1509	light responsiveness
AsGRAS21	Pepsico1_Contig29889.mrna2	1971	2017	anoxic specific inducibility
AsGRAS21	Pepsico1_Contig29889.mrna2	104	149	MeJA-responsiveness
AsGRAS21	Pepsico1_Contig29889.mrna2	533	578	MeJA-responsiveness
AsGRAS21	Pepsico1_Contig29889.mrna2	554	599	MeJA-responsiveness
AsGRAS21	Pepsico1_Contig29889.mrna2	431	479	conserved DNA module involved in light responsiveness
AsGRAS21	Pepsico1_Contig29889.mrna2	110	157	MYB binding site involved in light responsiveness
AsGRAS21	Pepsico1_Contig29889.mrna2	1499	1546	gibberellin-responsive element
AsGRAS21	Pepsico1_Contig29889.mrna2	16	62	light responsiveness
AsGRAS21	Pepsico1_Contig29889.mrna2	1108	1154	light responsiveness
AsGRAS15	Pepsico1_Contig30502.mrna1	10	56	conserved DNA module involved in light responsiveness
AsGRAS15	Pepsico1_Contig30502.mrna1	1456	1502	conserved DNA module involved in light responsiveness
AsGRAS15	Pepsico1_Contig30502.mrna1	810	856	meristem expression
AsGRAS15	Pepsico1_Contig30502.mrna1	1008	1054	MYB binding site involved in drought-inducibility
AsGRAS15	Pepsico1_Contig30502.mrna1	1505	1551	MYB binding site involved in drought-inducibility
AsGRAS15	Pepsico1_Contig30502.mrna1	1015	1060	MeJA-responsiveness
AsGRAS15	Pepsico1_Contig30502.mrna1	1237	1282	MeJA-responsiveness
AsGRAS15	Pepsico1_Contig30502.mrna1	257	303	low-temperature responsiveness
AsGRAS15	Pepsico1_Contig30502.mrna1	491	536	abscisic acid responsiveness
AsGRAS15	Pepsico1_Contig30502.mrna1	758	807	abscisic acid responsiveness
AsGRAS15	Pepsico1_Contig30502.mrna1	996	1043	endosperm expression
AsGRAS15	Pepsico1_Contig30502.mrna1	1765	1812	light responsive element
AsGRAS15	Pepsico1_Contig30502.mrna1	1949	1998	salicylic acid responsiveness
AsGRAS15	Pepsico1_Contig30502.mrna1	1160	1206	anoxic specific inducibility
AsGRAS15	Pepsico1_Contig30502.mrna1	1015	1060	MeJA-responsiveness
AsGRAS15	Pepsico1_Contig30502.mrna1	1237	1282	MeJA-responsiveness
AsGRAS15	Pepsico1_Contig30502.mrna1	565	611	auxin-responsive element
AsGRAS15	Pepsico1_Contig30502.mrna1	637	683	auxin-responsive element
AsGRAS15	Pepsico1_Contig30502.mrna1	646	692	auxin-responsive element
AsGRAS15	Pepsico1_Contig30502.mrna1	1328	1379	MYB binding site involved in flavonoid biosynthetic genes regulation
AsGRAS15	Pepsico1_Contig30502.mrna1	1391	1438	gibberellin-responsive element
AsGRAS15	Pepsico1_Contig30502.mrna1	1470	1517	gibberellin-responsive element
AsGRAS15	Pepsico1_Contig30502.mrna1	1947	1995	light responsive element
AsGRAS15	Pepsico1_Contig30502.mrna1	491	537	light responsiveness
AsGRAS15	Pepsico1_Contig30502.mrna1	949	997	module for light response
AsGRAS15	Pepsico1_Contig30502.mrna1	1179	1227	module for light response
AsGRAS15	Pepsico1_Contig30502.mrna1	609	655	anaerobic induction
AsGRAS15	Pepsico1_Contig30502.mrna1	1331	1377	anaerobic induction
AsGRAS15	Pepsico1_Contig30502.mrna1	1461	1507	anaerobic induction
AsGRAS15	Pepsico1_Contig30502.mrna1	1034	1081	gibberellin-responsive element
AsGRAS06	Pepsico1_Contig30502.mrna2	1460	1506	conserved DNA module involved in light responsiveness
AsGRAS06	Pepsico1_Contig30502.mrna2	1012	1058	MYB binding site involved in drought-inducibility
AsGRAS06	Pepsico1_Contig30502.mrna2	1509	1555	MYB binding site involved in drought-inducibility
AsGRAS06	Pepsico1_Contig30502.mrna2	218	263	MeJA-responsiveness
AsGRAS06	Pepsico1_Contig30502.mrna2	1019	1064	MeJA-responsiveness
AsGRAS06	Pepsico1_Contig30502.mrna2	1241	1286	MeJA-responsiveness
AsGRAS06	Pepsico1_Contig30502.mrna2	1000	1047	endosperm expression
AsGRAS06	Pepsico1_Contig30502.mrna2	216	261	abscisic acid responsiveness
AsGRAS06	Pepsico1_Contig30502.mrna2	324	369	abscisic acid responsiveness
AsGRAS06	Pepsico1_Contig30502.mrna2	354	403	abscisic acid responsiveness
AsGRAS06	Pepsico1_Contig30502.mrna2	94	142	seed-specific regulation
AsGRAS06	Pepsico1_Contig30502.mrna2	1766	1813	light responsive element
AsGRAS06	Pepsico1_Contig30502.mrna2	1568	1617	salicylic acid responsiveness
AsGRAS06	Pepsico1_Contig30502.mrna2	1949	1998	salicylic acid responsiveness
AsGRAS06	Pepsico1_Contig30502.mrna2	218	263	MeJA-responsiveness
AsGRAS06	Pepsico1_Contig30502.mrna2	1019	1064	MeJA-responsiveness
AsGRAS06	Pepsico1_Contig30502.mrna2	1241	1286	MeJA-responsiveness
AsGRAS06	Pepsico1_Contig30502.mrna2	1164	1210	anoxic specific inducibility
AsGRAS06	Pepsico1_Contig30502.mrna2	755	802	MYB binding site involved in light responsiveness
AsGRAS06	Pepsico1_Contig30502.mrna2	1947	1995	light responsive element
AsGRAS06	Pepsico1_Contig30502.mrna2	1395	1442	gibberellin-responsive element
AsGRAS06	Pepsico1_Contig30502.mrna2	1474	1521	gibberellin-responsive element
AsGRAS06	Pepsico1_Contig30502.mrna2	1332	1383	MYB binding site involved in flavonoid biosynthetic genes regulation
AsGRAS06	Pepsico1_Contig30502.mrna2	124	170	light responsiveness
AsGRAS06	Pepsico1_Contig30502.mrna2	216	262	light responsiveness
AsGRAS06	Pepsico1_Contig30502.mrna2	323	369	light responsiveness
AsGRAS06	Pepsico1_Contig30502.mrna2	344	390	light responsiveness
AsGRAS06	Pepsico1_Contig30502.mrna2	447	493	light responsiveness
AsGRAS06	Pepsico1_Contig30502.mrna2	1183	1231	module for light response
AsGRAS06	Pepsico1_Contig30502.mrna2	1335	1381	anaerobic induction
AsGRAS06	Pepsico1_Contig30502.mrna2	1465	1511	anaerobic induction
AsGRAS06	Pepsico1_Contig30502.mrna2	1038	1085	gibberellin-responsive element
AsGRAS06	Pepsico1_Contig30502.mrna2	896	944	light responsive element
AsGRAS06	Pepsico1_Contig30502.mrna2	138	184	cis-acting regulatory element
AsGRAS24	Pepsico1_Contig36247.mrna1	200	246	light responsiveness
AsGRAS24	Pepsico1_Contig36247.mrna1	330	378	light responsiveness
AsGRAS24	Pepsico1_Contig36247.mrna1	331	377	light responsiveness
AsGRAS24	Pepsico1_Contig36247.mrna1	954	1000	light responsiveness
AsGRAS24	Pepsico1_Contig36247.mrna1	990	1039	conserved DNA module involved in light responsiveness
AsGRAS24	Pepsico1_Contig36247.mrna1	211	257	anaerobic induction
AsGRAS24	Pepsico1_Contig36247.mrna1	50	97	gibberellin-responsiveness
AsGRAS24	Pepsico1_Contig36247.mrna1	974	1020	cis-acting regulatory element
AsGRAS24	Pepsico1_Contig36247.mrna1	1475	1521	anoxic specific inducibility
AsGRAS24	Pepsico1_Contig36247.mrna1	806	851	MeJA-responsiveness
AsGRAS24	Pepsico1_Contig36247.mrna1	956	1001	MeJA-responsiveness
AsGRAS24	Pepsico1_Contig36247.mrna1	1294	1339	MeJA-responsiveness
AsGRAS24	Pepsico1_Contig36247.mrna1	1919	1964	MeJA-responsiveness
AsGRAS24	Pepsico1_Contig36247.mrna1	332	377	abscisic acid responsiveness
AsGRAS24	Pepsico1_Contig36247.mrna1	764	811	abscisic acid responsiveness
AsGRAS24	Pepsico1_Contig36247.mrna1	954	999	abscisic acid responsiveness
AsGRAS24	Pepsico1_Contig36247.mrna1	1696	1742	MYB binding site involved in drought-inducibility
AsGRAS24	Pepsico1_Contig36247.mrna1	1089	1135	conserved DNA module involved in light responsiveness
AsGRAS24	Pepsico1_Contig36247.mrna1	1639	1685	conserved DNA module involved in light responsiveness
AsGRAS24	Pepsico1_Contig36247.mrna1	597	648	light responsive element
AsGRAS24	Pepsico1_Contig36247.mrna1	1703	1749	light responsive element
AsGRAS24	Pepsico1_Contig36247.mrna1	806	851	MeJA-responsiveness
AsGRAS24	Pepsico1_Contig36247.mrna1	956	1001	MeJA-responsiveness
AsGRAS24	Pepsico1_Contig36247.mrna1	1294	1339	MeJA-responsiveness
AsGRAS24	Pepsico1_Contig36247.mrna1	1919	1964	MeJA-responsiveness
AsGRAS24	Pepsico1_Contig36247.mrna1	1820	1866	low-temperature responsiveness
AsGRAS29	Pepsico2_Contig10379.mrna1	888	934	auxin-responsive element
AsGRAS29	Pepsico2_Contig10379.mrna1	1116	1162	auxin-responsive element
AsGRAS29	Pepsico2_Contig10379.mrna1	74	120	MYBHv1 binding site
AsGRAS29	Pepsico2_Contig10379.mrna1	425	470	MeJA-responsiveness
AsGRAS29	Pepsico2_Contig10379.mrna1	531	576	MeJA-responsiveness
AsGRAS29	Pepsico2_Contig10379.mrna1	1655	1700	MeJA-responsiveness
AsGRAS29	Pepsico2_Contig10379.mrna1	754	800	anaerobic induction
AsGRAS29	Pepsico2_Contig10379.mrna1	874	920	anaerobic induction
AsGRAS29	Pepsico2_Contig10379.mrna1	1617	1663	anaerobic induction
AsGRAS29	Pepsico2_Contig10379.mrna1	1865	1911	anaerobic induction
AsGRAS29	Pepsico2_Contig10379.mrna1	1867	1916	defense and stress responsiveness
AsGRAS29	Pepsico2_Contig10379.mrna1	1802	1849	gibberellin-responsiveness
AsGRAS29	Pepsico2_Contig10379.mrna1	824	870	light responsiveness
AsGRAS29	Pepsico2_Contig10379.mrna1	925	971	light responsiveness
AsGRAS29	Pepsico2_Contig10379.mrna1	1653	1699	light responsiveness
AsGRAS29	Pepsico2_Contig10379.mrna1	733	780	gibberellin-responsive element
AsGRAS29	Pepsico2_Contig10379.mrna1	1907	1955	light responsive element
AsGRAS29	Pepsico2_Contig10379.mrna1	943	989	light responsive element
AsGRAS29	Pepsico2_Contig10379.mrna1	899	947	light responsive element
AsGRAS29	Pepsico2_Contig10379.mrna1	195	241	low-temperature responsiveness
AsGRAS29	Pepsico2_Contig10379.mrna1	1673	1719	low-temperature responsiveness
AsGRAS29	Pepsico2_Contig10379.mrna1	425	470	MeJA-responsiveness
AsGRAS29	Pepsico2_Contig10379.mrna1	531	576	MeJA-responsiveness
AsGRAS29	Pepsico2_Contig10379.mrna1	1655	1700	MeJA-responsiveness
AsGRAS29	Pepsico2_Contig10379.mrna1	926	971	abscisic acid responsiveness
AsGRAS29	Pepsico2_Contig10379.mrna1	1653	1698	abscisic acid responsiveness
AsGRAS29	Pepsico2_Contig10379.mrna1	48	97	light responsiveness
AsGRAS23	Pepsico2_Contig10379.mrna3	711	758	gibberellin-responsive element
AsGRAS23	Pepsico2_Contig10379.mrna3	802	848	light responsiveness
AsGRAS23	Pepsico2_Contig10379.mrna3	1781	1828	gibberellin-responsiveness
AsGRAS23	Pepsico2_Contig10379.mrna3	1508	1556	module for light response
AsGRAS23	Pepsico2_Contig10379.mrna3	732	778	anaerobic induction
AsGRAS23	Pepsico2_Contig10379.mrna3	852	898	anaerobic induction
AsGRAS23	Pepsico2_Contig10379.mrna3	1578	1624	anaerobic induction
AsGRAS23	Pepsico2_Contig10379.mrna3	1844	1890	anaerobic induction
AsGRAS23	Pepsico2_Contig10379.mrna3	396	441	MeJA-responsiveness
AsGRAS23	Pepsico2_Contig10379.mrna3	505	550	MeJA-responsiveness
AsGRAS23	Pepsico2_Contig10379.mrna3	953	998	MeJA-responsiveness
AsGRAS23	Pepsico2_Contig10379.mrna3	866	912	auxin-responsive element
AsGRAS23	Pepsico2_Contig10379.mrna3	1269	1318	zein metabolism regulation
AsGRAS23	Pepsico2_Contig10379.mrna3	1537	1586	circadian control
AsGRAS23	Pepsico2_Contig10379.mrna3	148	197	light responsiveness
AsGRAS23	Pepsico2_Contig10379.mrna3	1605	1651	conserved DNA module involved in light responsiveness
AsGRAS23	Pepsico2_Contig10379.mrna3	877	925	light responsive element
AsGRAS23	Pepsico2_Contig10379.mrna3	921	967	light responsive element
AsGRAS23	Pepsico2_Contig10379.mrna3	396	441	MeJA-responsiveness
AsGRAS23	Pepsico2_Contig10379.mrna3	505	550	MeJA-responsiveness
AsGRAS23	Pepsico2_Contig10379.mrna3	953	998	MeJA-responsiveness
AsGRAS23	Pepsico2_Contig10379.mrna3	1652	1698	low-temperature responsiveness
AsGRAS26	Pepsico2_Contig1385.mrna1	1269	1318	zein metabolism regulation
AsGRAS26	Pepsico2_Contig1385.mrna1	148	197	light responsiveness
AsGRAS26	Pepsico2_Contig1385.mrna1	1537	1586	circadian control
AsGRAS26	Pepsico2_Contig1385.mrna1	921	967	light responsive element
AsGRAS26	Pepsico2_Contig1385.mrna1	877	925	light responsive element
AsGRAS26	Pepsico2_Contig1385.mrna1	1605	1651	conserved DNA module involved in light responsiveness
AsGRAS26	Pepsico2_Contig1385.mrna1	1652	1698	low-temperature responsiveness
AsGRAS26	Pepsico2_Contig1385.mrna1	396	441	MeJA-responsiveness
AsGRAS26	Pepsico2_Contig1385.mrna1	505	550	MeJA-responsiveness
AsGRAS26	Pepsico2_Contig1385.mrna1	953	998	MeJA-responsiveness
AsGRAS26	Pepsico2_Contig1385.mrna1	732	778	anaerobic induction
AsGRAS26	Pepsico2_Contig1385.mrna1	852	898	anaerobic induction
AsGRAS26	Pepsico2_Contig1385.mrna1	1578	1624	anaerobic induction
AsGRAS26	Pepsico2_Contig1385.mrna1	1844	1890	anaerobic induction
AsGRAS26	Pepsico2_Contig1385.mrna1	1508	1556	module for light response
AsGRAS26	Pepsico2_Contig1385.mrna1	1781	1828	gibberellin-responsiveness
AsGRAS26	Pepsico2_Contig1385.mrna1	802	848	light responsiveness
AsGRAS26	Pepsico2_Contig1385.mrna1	711	758	gibberellin-responsive element
AsGRAS26	Pepsico2_Contig1385.mrna1	866	912	auxin-responsive element
AsGRAS26	Pepsico2_Contig1385.mrna1	396	441	MeJA-responsiveness
AsGRAS26	Pepsico2_Contig1385.mrna1	505	550	MeJA-responsiveness
AsGRAS26	Pepsico2_Contig1385.mrna1	953	998	MeJA-responsiveness
AsGRAS28	Pepsico2_Contig1385.mrna2	48	97	light responsiveness
AsGRAS28	Pepsico2_Contig1385.mrna2	926	971	abscisic acid responsiveness
AsGRAS28	Pepsico2_Contig1385.mrna2	1653	1698	abscisic acid responsiveness
AsGRAS28	Pepsico2_Contig1385.mrna2	425	470	MeJA-responsiveness
AsGRAS28	Pepsico2_Contig1385.mrna2	531	576	MeJA-responsiveness
AsGRAS28	Pepsico2_Contig1385.mrna2	1655	1700	MeJA-responsiveness
AsGRAS28	Pepsico2_Contig1385.mrna2	195	241	low-temperature responsiveness
AsGRAS28	Pepsico2_Contig1385.mrna2	1673	1719	low-temperature responsiveness
AsGRAS28	Pepsico2_Contig1385.mrna2	899	947	light responsive element
AsGRAS28	Pepsico2_Contig1385.mrna2	943	989	light responsive element
AsGRAS28	Pepsico2_Contig1385.mrna2	824	870	light responsiveness
AsGRAS28	Pepsico2_Contig1385.mrna2	925	971	light responsiveness
AsGRAS28	Pepsico2_Contig1385.mrna2	1653	1699	light responsiveness
AsGRAS28	Pepsico2_Contig1385.mrna2	1907	1955	light responsive element
AsGRAS28	Pepsico2_Contig1385.mrna2	733	780	gibberellin-responsive element
AsGRAS28	Pepsico2_Contig1385.mrna2	754	800	anaerobic induction
AsGRAS28	Pepsico2_Contig1385.mrna2	874	920	anaerobic induction
AsGRAS28	Pepsico2_Contig1385.mrna2	1617	1663	anaerobic induction
AsGRAS28	Pepsico2_Contig1385.mrna2	1865	1911	anaerobic induction
AsGRAS28	Pepsico2_Contig1385.mrna2	1867	1916	defense and stress responsiveness
AsGRAS28	Pepsico2_Contig1385.mrna2	1802	1849	gibberellin-responsiveness
AsGRAS28	Pepsico2_Contig1385.mrna2	74	120	MYBHv1 binding site
AsGRAS28	Pepsico2_Contig1385.mrna2	425	470	MeJA-responsiveness
AsGRAS28	Pepsico2_Contig1385.mrna2	531	576	MeJA-responsiveness
AsGRAS28	Pepsico2_Contig1385.mrna2	1655	1700	MeJA-responsiveness
AsGRAS28	Pepsico2_Contig1385.mrna2	888	934	auxin-responsive element
AsGRAS28	Pepsico2_Contig1385.mrna2	1116	1162	auxin-responsive element
AsGRAS18	Pepsico2_Contig16943.mrna3	1914	1962	light responsive element
AsGRAS18	Pepsico2_Contig16943.mrna3	1551	1601	light response element
AsGRAS18	Pepsico2_Contig16943.mrna3	109	155	anaerobic induction
AsGRAS18	Pepsico2_Contig16943.mrna3	42	88	cis-acting regulatory element
AsGRAS18	Pepsico2_Contig16943.mrna3	89	135	cis-acting regulatory element
AsGRAS18	Pepsico2_Contig16943.mrna3	1027	1074	light responsiveness
AsGRAS18	Pepsico2_Contig16943.mrna3	1028	1074	light responsiveness
AsGRAS18	Pepsico2_Contig16943.mrna3	1587	1633	light responsiveness
AsGRAS18	Pepsico2_Contig16943.mrna3	1354	1404	conserved DNA module array (CMA3)
AsGRAS18	Pepsico2_Contig16943.mrna3	1986	2035	zein metabolism regulation
AsGRAS18	Pepsico2_Contig16943.mrna3	169	216	light responsive element
AsGRAS18	Pepsico2_Contig16943.mrna3	1301	1347	conserved DNA module involved in light responsiveness
AsGRAS18	Pepsico2_Contig16943.mrna3	1666	1712	conserved DNA module involved in light responsiveness
AsGRAS18	Pepsico2_Contig16943.mrna3	1733	1779	conserved DNA module involved in light responsiveness
AsGRAS18	Pepsico2_Contig16943.mrna3	1882	1928	MYB binding site involved in drought-inducibility
AsGRAS18	Pepsico2_Contig16943.mrna3	678	724	meristem expression
AsGRAS18	Pepsico2_Contig16943.mrna3	1035	1081	light responsive element
AsGRAS18	Pepsico2_Contig16943.mrna3	441	490	light responsive element
AsGRAS18	Pepsico2_Contig16943.mrna3	632	678	low-temperature responsiveness
AsGRAS02	Pepsico2_Contig16967.mrna1	525	571	cis-acting regulatory element
AsGRAS02	Pepsico2_Contig16967.mrna1	84	130	light responsiveness
AsGRAS02	Pepsico2_Contig16967.mrna1	1952	1998	light responsiveness
AsGRAS02	Pepsico2_Contig16967.mrna1	1106	1152	anaerobic induction
AsGRAS02	Pepsico2_Contig16967.mrna1	315	364	defense and stress responsiveness
AsGRAS02	Pepsico2_Contig16967.mrna1	1095	1141	anoxic specific inducibility
AsGRAS02	Pepsico2_Contig16967.mrna1	1188	1233	MeJA-responsiveness
AsGRAS02	Pepsico2_Contig16967.mrna1	1954	1999	MeJA-responsiveness
AsGRAS02	Pepsico2_Contig16967.mrna1	182	228	auxin-responsive element
AsGRAS02	Pepsico2_Contig16967.mrna1	1729	1775	auxin-responsive element
AsGRAS02	Pepsico2_Contig16967.mrna1	1925	1972	light responsive element
AsGRAS02	Pepsico2_Contig16967.mrna1	1952	1997	abscisic acid responsiveness
AsGRAS02	Pepsico2_Contig16967.mrna1	1188	1233	MeJA-responsiveness
AsGRAS02	Pepsico2_Contig16967.mrna1	1954	1999	MeJA-responsiveness
AsGRAS02	Pepsico2_Contig16967.mrna1	130	179	cell cycle regulation
AsGRAS02	Pepsico2_Contig16967.mrna1	1555	1604	cell cycle regulation
AsGRAS02	Pepsico2_Contig16967.mrna1	1785	1831	low-temperature responsiveness
AsGRAS20	Pepsico2_Contig1709.mrna1	565	611	auxin-responsive element
AsGRAS20	Pepsico2_Contig1709.mrna1	637	683	auxin-responsive element
AsGRAS20	Pepsico2_Contig1709.mrna1	646	692	auxin-responsive element
AsGRAS20	Pepsico2_Contig1709.mrna1	1160	1206	anoxic specific inducibility
AsGRAS20	Pepsico2_Contig1709.mrna1	1015	1060	MeJA-responsiveness
AsGRAS20	Pepsico2_Contig1709.mrna1	1237	1282	MeJA-responsiveness
AsGRAS20	Pepsico2_Contig1709.mrna1	609	655	anaerobic induction
AsGRAS20	Pepsico2_Contig1709.mrna1	1331	1377	anaerobic induction
AsGRAS20	Pepsico2_Contig1709.mrna1	1461	1507	anaerobic induction
AsGRAS20	Pepsico2_Contig1709.mrna1	949	997	module for light response
AsGRAS20	Pepsico2_Contig1709.mrna1	1179	1227	module for light response
AsGRAS20	Pepsico2_Contig1709.mrna1	491	537	light responsiveness
AsGRAS20	Pepsico2_Contig1709.mrna1	1328	1379	MYB binding site involved in flavonoid biosynthetic genes regulation
AsGRAS20	Pepsico2_Contig1709.mrna1	1947	1995	light responsive element
AsGRAS20	Pepsico2_Contig1709.mrna1	1391	1438	gibberellin-responsive element
AsGRAS20	Pepsico2_Contig1709.mrna1	1470	1517	gibberellin-responsive element
AsGRAS20	Pepsico2_Contig1709.mrna1	1034	1081	gibberellin-responsive element
AsGRAS20	Pepsico2_Contig1709.mrna1	810	856	meristem expression
AsGRAS20	Pepsico2_Contig1709.mrna1	1008	1054	MYB binding site involved in drought-inducibility
AsGRAS20	Pepsico2_Contig1709.mrna1	1505	1551	MYB binding site involved in drought-inducibility
AsGRAS20	Pepsico2_Contig1709.mrna1	10	56	conserved DNA module involved in light responsiveness
AsGRAS20	Pepsico2_Contig1709.mrna1	1456	1502	conserved DNA module involved in light responsiveness
AsGRAS20	Pepsico2_Contig1709.mrna1	257	303	low-temperature responsiveness
AsGRAS20	Pepsico2_Contig1709.mrna1	1015	1060	MeJA-responsiveness
AsGRAS20	Pepsico2_Contig1709.mrna1	1237	1282	MeJA-responsiveness
AsGRAS20	Pepsico2_Contig1709.mrna1	491	536	abscisic acid responsiveness
AsGRAS20	Pepsico2_Contig1709.mrna1	758	807	abscisic acid responsiveness
AsGRAS20	Pepsico2_Contig1709.mrna1	996	1043	endosperm expression
AsGRAS20	Pepsico2_Contig1709.mrna1	1949	1998	salicylic acid responsiveness
AsGRAS20	Pepsico2_Contig1709.mrna1	1765	1812	light responsive element
AsGRAS03	Pepsico2_Contig1709.mrna2	94	142	seed-specific regulation
AsGRAS03	Pepsico2_Contig1709.mrna2	1766	1813	light responsive element
AsGRAS03	Pepsico2_Contig1709.mrna2	1568	1617	salicylic acid responsiveness
AsGRAS03	Pepsico2_Contig1709.mrna2	1949	1998	salicylic acid responsiveness
AsGRAS03	Pepsico2_Contig1709.mrna2	1000	1047	endosperm expression
AsGRAS03	Pepsico2_Contig1709.mrna2	216	261	abscisic acid responsiveness
AsGRAS03	Pepsico2_Contig1709.mrna2	324	369	abscisic acid responsiveness
AsGRAS03	Pepsico2_Contig1709.mrna2	354	403	abscisic acid responsiveness
AsGRAS03	Pepsico2_Contig1709.mrna2	218	263	MeJA-responsiveness
AsGRAS03	Pepsico2_Contig1709.mrna2	1019	1064	MeJA-responsiveness
AsGRAS03	Pepsico2_Contig1709.mrna2	1241	1286	MeJA-responsiveness
AsGRAS03	Pepsico2_Contig1709.mrna2	1460	1506	conserved DNA module involved in light responsiveness
AsGRAS03	Pepsico2_Contig1709.mrna2	1012	1058	MYB binding site involved in drought-inducibility
AsGRAS03	Pepsico2_Contig1709.mrna2	1509	1555	MYB binding site involved in drought-inducibility
AsGRAS03	Pepsico2_Contig1709.mrna2	1038	1085	gibberellin-responsive element
AsGRAS03	Pepsico2_Contig1709.mrna2	896	944	light responsive element
AsGRAS03	Pepsico2_Contig1709.mrna2	138	184	cis-acting regulatory element
AsGRAS03	Pepsico2_Contig1709.mrna2	1395	1442	gibberellin-responsive element
AsGRAS03	Pepsico2_Contig1709.mrna2	1474	1521	gibberellin-responsive element
AsGRAS03	Pepsico2_Contig1709.mrna2	1947	1995	light responsive element
AsGRAS03	Pepsico2_Contig1709.mrna2	1332	1383	MYB binding site involved in flavonoid biosynthetic genes regulation
AsGRAS03	Pepsico2_Contig1709.mrna2	124	170	light responsiveness
AsGRAS03	Pepsico2_Contig1709.mrna2	216	262	light responsiveness
AsGRAS03	Pepsico2_Contig1709.mrna2	323	369	light responsiveness
AsGRAS03	Pepsico2_Contig1709.mrna2	344	390	light responsiveness
AsGRAS03	Pepsico2_Contig1709.mrna2	447	493	light responsiveness
AsGRAS03	Pepsico2_Contig1709.mrna2	1183	1231	module for light response
AsGRAS03	Pepsico2_Contig1709.mrna2	1335	1381	anaerobic induction
AsGRAS03	Pepsico2_Contig1709.mrna2	1465	1511	anaerobic induction
AsGRAS03	Pepsico2_Contig1709.mrna2	755	802	MYB binding site involved in light responsiveness
AsGRAS03	Pepsico2_Contig1709.mrna2	218	263	MeJA-responsiveness
AsGRAS03	Pepsico2_Contig1709.mrna2	1019	1064	MeJA-responsiveness
AsGRAS03	Pepsico2_Contig1709.mrna2	1241	1286	MeJA-responsiveness
AsGRAS03	Pepsico2_Contig1709.mrna2	1164	1210	anoxic specific inducibility
AsGRAS09	Pepsico2_Contig4966.mrna2	1135	1188	light responsive module
AsGRAS09	Pepsico2_Contig4966.mrna2	1954	1999	MeJA-responsiveness
AsGRAS09	Pepsico2_Contig4966.mrna2	129	175	anaerobic induction
AsGRAS09	Pepsico2_Contig4966.mrna2	1492	1538	anaerobic induction
AsGRAS09	Pepsico2_Contig4966.mrna2	1103	1152	defense and stress responsiveness
AsGRAS09	Pepsico2_Contig4966.mrna2	239	288	light responsiveness
AsGRAS09	Pepsico2_Contig4966.mrna2	241	287	light responsiveness
AsGRAS09	Pepsico2_Contig4966.mrna2	1938	1984	light responsiveness
AsGRAS09	Pepsico2_Contig4966.mrna2	1954	1999	MeJA-responsiveness
AsGRAS09	Pepsico2_Contig4966.mrna2	272	318	light responsive element
AsGRAS09	Pepsico2_Contig4966.mrna2	491	537	light responsive element
AsGRAS09	Pepsico2_Contig4966.mrna2	1037	1085	light responsive element
AsGRAS09	Pepsico2_Contig4966.mrna2	608	654	conserved DNA module involved in light responsiveness
AsGRAS09	Pepsico2_Contig4966.mrna2	916	962	conserved DNA module involved in light responsiveness
AsGRAS09	Pepsico2_Contig4966.mrna2	1182	1228	conserved DNA module involved in light responsiveness
AsGRAS09	Pepsico2_Contig4966.mrna2	1207	1253	conserved DNA module involved in light responsiveness
AsGRAS09	Pepsico2_Contig4966.mrna2	1359	1405	conserved DNA module involved in light responsiveness
AsGRAS09	Pepsico2_Contig4966.mrna2	1363	1409	conserved DNA module involved in light responsiveness
AsGRAS09	Pepsico2_Contig4966.mrna2	1388	1434	conserved DNA module involved in light responsiveness
AsGRAS09	Pepsico2_Contig4966.mrna2	1427	1473	conserved DNA module involved in light responsiveness
AsGRAS09	Pepsico2_Contig4966.mrna2	241	287	light responsiveness
AsGRAS09	Pepsico2_Contig4966.mrna2	1938	1984	light responsiveness
AsGRAS09	Pepsico2_Contig4966.mrna2	241	287	abscisic acid responsiveness
AsGRAS09	Pepsico2_Contig4966.mrna2	242	287	abscisic acid responsiveness
AsGRAS09	Pepsico2_Contig4966.mrna2	1087	1134	abscisic acid responsiveness
AsGRAS09	Pepsico2_Contig4966.mrna2	1938	1984	abscisic acid responsiveness
AsGRAS09	Pepsico2_Contig4966.mrna2	1939	1984	abscisic acid responsiveness
AsGRAS19	Pepsico2_Contig5101.mrna1	1986	2035	zein metabolism regulation
AsGRAS19	Pepsico2_Contig5101.mrna1	169	216	light responsive element
AsGRAS19	Pepsico2_Contig5101.mrna1	1035	1081	light responsive element
AsGRAS19	Pepsico2_Contig5101.mrna1	1301	1347	conserved DNA module involved in light responsiveness
AsGRAS19	Pepsico2_Contig5101.mrna1	1666	1712	conserved DNA module involved in light responsiveness
AsGRAS19	Pepsico2_Contig5101.mrna1	1733	1779	conserved DNA module involved in light responsiveness
AsGRAS19	Pepsico2_Contig5101.mrna1	1882	1928	MYB binding site involved in drought-inducibility
AsGRAS19	Pepsico2_Contig5101.mrna1	678	724	meristem expression
AsGRAS19	Pepsico2_Contig5101.mrna1	632	678	low-temperature responsiveness
AsGRAS19	Pepsico2_Contig5101.mrna1	441	490	light responsive element
AsGRAS19	Pepsico2_Contig5101.mrna1	1551	1601	light response element
AsGRAS19	Pepsico2_Contig5101.mrna1	109	155	anaerobic induction
AsGRAS19	Pepsico2_Contig5101.mrna1	1914	1962	light responsive element
AsGRAS19	Pepsico2_Contig5101.mrna1	42	88	cis-acting regulatory element
AsGRAS19	Pepsico2_Contig5101.mrna1	89	135	cis-acting regulatory element
AsGRAS19	Pepsico2_Contig5101.mrna1	1027	1074	light responsiveness
AsGRAS19	Pepsico2_Contig5101.mrna1	1028	1074	light responsiveness
AsGRAS19	Pepsico2_Contig5101.mrna1	1587	1633	light responsiveness
AsGRAS19	Pepsico2_Contig5101.mrna1	1354	1404	conserved DNA module array (CMA3)
AsGRAS10	Pepsico2_Contig7359.mrna1	311	356	MeJA-responsiveness
AsGRAS10	Pepsico2_Contig7359.mrna1	760	805	MeJA-responsiveness
AsGRAS10	Pepsico2_Contig7359.mrna1	781	826	MeJA-responsiveness
AsGRAS10	Pepsico2_Contig7359.mrna1	50	96	low-temperature responsiveness
AsGRAS10	Pepsico2_Contig7359.mrna1	913	959	low-temperature responsiveness
AsGRAS10	Pepsico2_Contig7359.mrna1	408	459	light responsive element
AsGRAS10	Pepsico2_Contig7359.mrna1	1011	1057	meristem expression
AsGRAS10	Pepsico2_Contig7359.mrna1	1569	1615	meristem expression
AsGRAS10	Pepsico2_Contig7359.mrna1	1669	1715	meristem expression
AsGRAS10	Pepsico2_Contig7359.mrna1	936	982	MYB binding site involved in drought-inducibility
AsGRAS10	Pepsico2_Contig7359.mrna1	479	525	light responsive element
AsGRAS10	Pepsico2_Contig7359.mrna1	202	248	light responsiveness
AsGRAS10	Pepsico2_Contig7359.mrna1	670	717	light responsive element
AsGRAS10	Pepsico2_Contig7359.mrna1	1561	1608	light responsive element
AsGRAS10	Pepsico2_Contig7359.mrna1	1605	1652	light responsive element
AsGRAS10	Pepsico2_Contig7359.mrna1	1611	1658	light responsive element
AsGRAS10	Pepsico2_Contig7359.mrna1	1617	1664	light responsive element
AsGRAS10	Pepsico2_Contig7359.mrna1	1623	1670	light responsive element
AsGRAS10	Pepsico2_Contig7359.mrna1	42	87	abscisic acid responsiveness
AsGRAS10	Pepsico2_Contig7359.mrna1	239	284	abscisic acid responsiveness
AsGRAS10	Pepsico2_Contig7359.mrna1	728	775	abscisic acid responsiveness
AsGRAS10	Pepsico2_Contig7359.mrna1	317	364	MYB binding site involved in light responsiveness
AsGRAS10	Pepsico2_Contig7359.mrna1	658	706	conserved DNA module involved in light responsiveness
AsGRAS10	Pepsico2_Contig7359.mrna1	311	356	MeJA-responsiveness
AsGRAS10	Pepsico2_Contig7359.mrna1	760	805	MeJA-responsiveness
AsGRAS10	Pepsico2_Contig7359.mrna1	781	826	MeJA-responsiveness
AsGRAS10	Pepsico2_Contig7359.mrna1	1971	2017	anoxic specific inducibility
AsGRAS10	Pepsico2_Contig7359.mrna1	1430	1476	light responsiveness
AsGRAS10	Pepsico2_Contig7359.mrna1	1466	1513	gibberellin-responsive element
AsGRAS10	Pepsico2_Contig7359.mrna1	41	87	light responsiveness
AsGRAS10	Pepsico2_Contig7359.mrna1	170	216	light responsiveness
AsGRAS10	Pepsico2_Contig7359.mrna1	239	285	light responsiveness
AsGRAS10	Pepsico2_Contig7359.mrna1	305	354	defense and stress responsiveness
AsGRAS16	Pepsico2_Contig7359.mrna2	110	157	MYB binding site involved in light responsiveness
AsGRAS16	Pepsico2_Contig7359.mrna2	431	479	conserved DNA module involved in light responsiveness
AsGRAS16	Pepsico2_Contig7359.mrna2	1971	2017	anoxic specific inducibility
AsGRAS16	Pepsico2_Contig7359.mrna2	104	149	MeJA-responsiveness
AsGRAS16	Pepsico2_Contig7359.mrna2	533	578	MeJA-responsiveness
AsGRAS16	Pepsico2_Contig7359.mrna2	554	599	MeJA-responsiveness
AsGRAS16	Pepsico2_Contig7359.mrna2	1463	1509	light responsiveness
AsGRAS16	Pepsico2_Contig7359.mrna2	1499	1546	gibberellin-responsive element
AsGRAS16	Pepsico2_Contig7359.mrna2	16	62	light responsiveness
AsGRAS16	Pepsico2_Contig7359.mrna2	1108	1154	light responsiveness
AsGRAS16	Pepsico2_Contig7359.mrna2	104	149	MeJA-responsiveness
AsGRAS16	Pepsico2_Contig7359.mrna2	533	578	MeJA-responsiveness
AsGRAS16	Pepsico2_Contig7359.mrna2	554	599	MeJA-responsiveness
AsGRAS16	Pepsico2_Contig7359.mrna2	687	733	low-temperature responsiveness
AsGRAS16	Pepsico2_Contig7359.mrna2	707	753	MYB binding site involved in drought-inducibility
AsGRAS16	Pepsico2_Contig7359.mrna2	782	828	meristem expression
AsGRAS16	Pepsico2_Contig7359.mrna2	1592	1638	meristem expression
AsGRAS16	Pepsico2_Contig7359.mrna2	1674	1720	meristem expression
AsGRAS16	Pepsico2_Contig7359.mrna2	254	300	light responsive element
AsGRAS16	Pepsico2_Contig7359.mrna2	1108	1154	light responsiveness
AsGRAS16	Pepsico2_Contig7359.mrna2	443	490	light responsive element
AsGRAS16	Pepsico2_Contig7359.mrna2	1627	1674	light responsive element
AsGRAS16	Pepsico2_Contig7359.mrna2	1635	1682	light responsive element
AsGRAS16	Pepsico2_Contig7359.mrna2	16	61	abscisic acid responsiveness
AsGRAS16	Pepsico2_Contig7359.mrna2	501	548	abscisic acid responsiveness
AsGRAS16	Pepsico2_Contig7359.mrna2	1106	1155	abscisic acid responsiveness
AsGRAS16	Pepsico2_Contig7359.mrna2	1108	1154	abscisic acid responsiveness
AsGRAS16	Pepsico2_Contig7359.mrna2	1109	1154	abscisic acid responsiveness
AsGRAS27	Pepsico2_Contig8490.mrna1	34	79	MeJA-responsiveness
AsGRAS27	Pepsico2_Contig8490.mrna1	1642	1687	MeJA-responsiveness
AsGRAS27	Pepsico2_Contig8490.mrna1	338	385	auxin responsiveness
AsGRAS27	Pepsico2_Contig8490.mrna1	1360	1407	auxin responsiveness
AsGRAS27	Pepsico2_Contig8490.mrna1	372	418	low-temperature responsiveness
AsGRAS27	Pepsico2_Contig8490.mrna1	1970	2016	low-temperature responsiveness
AsGRAS27	Pepsico2_Contig8490.mrna1	451	497	conserved DNA module involved in light responsiveness
AsGRAS27	Pepsico2_Contig8490.mrna1	465	511	conserved DNA module involved in light responsiveness
AsGRAS27	Pepsico2_Contig8490.mrna1	1569	1615	light responsiveness
AsGRAS27	Pepsico2_Contig8490.mrna1	1780	1826	light responsiveness
AsGRAS27	Pepsico2_Contig8490.mrna1	1940	1986	light responsiveness
AsGRAS27	Pepsico2_Contig8490.mrna1	614	660	light responsiveness
AsGRAS27	Pepsico2_Contig8490.mrna1	917	963	light responsiveness
AsGRAS27	Pepsico2_Contig8490.mrna1	874	921	light responsive element
AsGRAS27	Pepsico2_Contig8490.mrna1	1697	1746	circadian control
AsGRAS27	Pepsico2_Contig8490.mrna1	343	392	salicylic acid responsiveness
AsGRAS27	Pepsico2_Contig8490.mrna1	629	679	light responsive element
AsGRAS27	Pepsico2_Contig8490.mrna1	906	956	light responsive element
AsGRAS27	Pepsico2_Contig8490.mrna1	612	661	abscisic acid responsiveness
AsGRAS27	Pepsico2_Contig8490.mrna1	614	660	abscisic acid responsiveness
AsGRAS27	Pepsico2_Contig8490.mrna1	615	660	abscisic acid responsiveness
AsGRAS27	Pepsico2_Contig8490.mrna1	732	781	abscisic acid responsiveness
AsGRAS27	Pepsico2_Contig8490.mrna1	889	937	abscisic acid responsiveness
AsGRAS27	Pepsico2_Contig8490.mrna1	891	936	abscisic acid responsiveness
AsGRAS27	Pepsico2_Contig8490.mrna1	917	962	abscisic acid responsiveness
AsGRAS27	Pepsico2_Contig8490.mrna1	964	1009	abscisic acid responsiveness
AsGRAS27	Pepsico2_Contig8490.mrna1	1135	1184	abscisic acid responsiveness
AsGRAS27	Pepsico2_Contig8490.mrna1	1210	1255	abscisic acid responsiveness
AsGRAS27	Pepsico2_Contig8490.mrna1	2004	2049	abscisic acid responsiveness
AsGRAS27	Pepsico2_Contig8490.mrna1	569	616	MYB binding site involved in light responsiveness
AsGRAS27	Pepsico2_Contig8490.mrna1	34	79	MeJA-responsiveness
AsGRAS27	Pepsico2_Contig8490.mrna1	1642	1687	MeJA-responsiveness
AsGRAS27	Pepsico2_Contig8490.mrna1	1459	1505	anoxic specific inducibility
AsGRAS27	Pepsico2_Contig8490.mrna1	1566	1612	anoxic specific inducibility
AsGRAS27	Pepsico2_Contig8490.mrna1	183	229	MYBHv1 binding site
AsGRAS27	Pepsico2_Contig8490.mrna1	820	866	MYBHv1 binding site
AsGRAS27	Pepsico2_Contig8490.mrna1	346	398	light responsive element
AsGRAS27	Pepsico2_Contig8490.mrna1	717	764	light responsiveness
AsGRAS27	Pepsico2_Contig8490.mrna1	994	1041	light responsiveness
AsGRAS27	Pepsico2_Contig8490.mrna1	1476	1522	cis-acting regulatory element
AsGRAS27	Pepsico2_Contig8490.mrna1	54	100	light responsiveness
AsGRAS27	Pepsico2_Contig8490.mrna1	614	660	light responsiveness
AsGRAS27	Pepsico2_Contig8490.mrna1	891	937	light responsiveness
AsGRAS27	Pepsico2_Contig8490.mrna1	962	1010	light responsiveness
AsGRAS27	Pepsico2_Contig8490.mrna1	963	1009	light responsiveness
AsGRAS27	Pepsico2_Contig8490.mrna1	1209	1255	light responsiveness
AsGRAS27	Pepsico2_Contig8490.mrna1	1523	1569	light responsiveness
AsGRAS27	Pepsico2_Contig8490.mrna1	2003	2049	light responsiveness
AsGRAS27	Pepsico2_Contig8490.mrna1	179	225	anaerobic induction
