# Supplementary material for: Genome-wide identification and characterization of abiotic stress responsive GRAS family genes in oat (Avena sativa)
Source: PeerJ. 2023 May 9;11:e15370. doi: 10.7717/peerj.15370 (PMC10178225; doi:10.7717/peerj.15370)
Supplement: Supplemental Information 7 — The raw data of the qRT-PCR results. [file peerj-11-15370-s007.xlsx]

## Sheet: Sheet1
Table S7 Expression profiles of AsGRAS genes in oat leaf and root during drought and salt stresses
AsGRAS Gene Name	Expression site	CK_0h	CK_0h SD	Dr_1h	Dr_1h SD	Dr_3h	Dr_3h SD	Dr_6h	Dr_6h SD	Dr_24h	Dr_24h SD	Dr_48h	Dr_48h SD	Na_1h	Na_1h SD	Na_3h	Na_3h SD	Na_6h	Na_6h SD	Na_24h	Na_24h SD	Na_48h	Na_48h SD
AsGRAS01	Leaf	1	0	2.36968	0.508961	5.18124	1.12614	5.58723	0.59278	5.07677	0.604431	6.27338	0.66149	2.15026	0.896375	3.95256	0.896375	2.687	0.896375	8.91812	0.896375	5.91854	0.896375
AsGRAS01	Root	1	0	5.43036	0.299	3.82893	0.693922	6.64727	1.34283	8.59591	0.541086	15.7707	2.37965	6.92567	0.835648	10.5935	0.421011	15.1113	3.19451	15.0448	2.13175	15.9991	2.56137
AsGRAS04	Leaf	1	0	1.67026	0.153168	2.7593	0.0524357	4.89954	1.38397	5.10565	1.23733	5.1426	0.701094	1.98339	0.771595	2.0517	1.43284	1.70525	0.519571	6.50931	1.53211	4.5601	1.29613
AsGRAS04	Root	1	0	2.71321	0.865023	4.7742	1.53807	4.12871	0.366526	5.30396	1.70844	10.3087	3.61766	1.7341	0.138022	6.55471	2.28311	6.56236	0.462512	4.64445	0.785104	2.14756	0.161754
AsGRAS12	Leaf	1	0	1.96536	0.620509	2.56191	0.307857	3.80204	0.806744	3.32534	1.61186	3.38247	0.425749	0.704142	0.435121	2.90398	0.763742	2.55256	0.206118	4.69826	0.808998	2.44001	0.515954
AsGRAS12	Root	1	0	1.50628	0.64498	1.88256	0.493749	1.44311	1.02357	4.27296	1.13134	2.83107	0.421778	3.38863	0.595878	10.3181	1.88256	9.24604	5.40965	7.71732	1.74888	1.61056	0.321895
AsGRAS14	Leaf	1	0	2.22399	1.83297	3.37973	1.14182	6.57309	0.235039	6.01934	3.98473	4.91848	0.483787	0.88939	0.737994	3.96741	2.96299	3.25137	0.497898	3.67101	1.65396	3.24427	0.530415
AsGRAS14	Root	1	0	0.466437	0.314214	1.44666	0.862338	1.95242	1.45877	4.60082	0.516102	4.03246	1.79893	6.08687	0.805782	9.49405	2.03963	17.1117	0.706745	7.51804	0.341513	1.44889	0.46235
AsGRAS17	Leaf	1	0	1.28165	0.728235	5.18218	1.84732	2.50138	0.214357	1.4241	0.123071	3.81424	0.861784	1.93767	1.31268	2.81191	1.07336	2.15956	1.30047	1.05578	0.43236	3.16647	0.619617
AsGRAS17	Root	1	0	1.36998	0.560932	1.56164	0.464404	1.75881	1.28313	2.37752	0.684966	1.9208	0.245421	4.23386	0.878576	5.15169	1.41112	10.648	0.398125	3.23454	0.855924	1.14498	0.555424
AsGRAS18	Leaf	1	0	3.13181	2.52816	6.64272	3.72389	2.81679	0.0925036	6.67844	0.78182	5.56304	0.159028	1.47384	0.374526	2.53751	0.557516	5.50165	0.34252	4.47952	0.295627	5.24234	0.676117
AsGRAS18	Root	1	0	1.70908	1.11671	2.52462	0.348639	4.10179	0.966025	3.47226	0.35324	2.49856	0.0917233	4.18634	0.209223	3.04981	0.947217	10.7338	0.176107	2.45433	0.723415	0.773138	0.317754
AsGRAS21	Leaf	1	0	3.91959	0.777122	5.14454	1.98716	10.5803	0.292376	10.0206	3.19533	16.6301	1.05205	1.36724	0.30339	5.39143	1.84447	3.14466	0.465288	9.95929	0.307305	10.6444	2.66456
AsGRAS21	Root	1	0	0.68029	0.660532	2.31756	0.44141	3.84558	0.701716	1.79375	0.168406	7.02265	1.3244	2.38369	0.456146	4.47329	1.67297	3.8057	1.17391	7.59545	0.167281	4.05444	0.589238
AsGRAS23	Leaf	1	0	3.13753	0.325691	3.45076	0.345018	6.32138	1.47102	6.85733	0.401621	4.60059	0.326576	4.2504	1.49479	6.45098	0.603321	7.50751	2.08175	4.344	1.77875	4.73865	1.17186
AsGRAS23	Root	1	0	4.48014	0.434855	3.329	1.41979	3.66689	0.799113	1.23566	0.125347	3.4559	0.318763	5.53069	0.310818	2.24951	0.196305	9.11814	1.72907	3.75552	0.597157	1.02787	0.11116
AsGRAS24	Leaf	1	0	2.41324	0.441451	2.52176	0.439767	4.92232	1.37427	2.41485	0.904668	3.21816	0.627746	3.60908	1.15282	3.96471	0.603417	3.97261	1.3132	2.15068	0.526111	3.95094	0.637503
AsGRAS24	Root	1	0	5.09796	1.61185	7.98035	1.55862	3.24122	1.36727	3.79469	0.417959	2.67863	0.95633	6.03545	0.657466	7.30902	0.400821	11.2283	1.33183	2.82561	0.657114	1.04956	0.582766
AsGRAS27	Leaf	1	0	0.679324	0.181202	3.30398	0.182642	3.89391	0.562075	0.829476	0.0941852	1.2278	0.469481	0.484999	0.44324	2.02655	1.27391	1.54838	0.164328	1.30193	0.302027	2.43507	0.580995
AsGRAS27	Root	1	0	0.858244	0.773117	1.20877	0.141935	0.997548	0.75964	5.14412	0.79401	4.29475	0.419461	2.35096	0.559968	4.06197	0.331018	2.27517	0.307451	2.75684	0.7862	0.931808	0.532071
AsGRAS29	Leaf	1	0	2.96631	0.254835	3.72576	0.165804	4.21558	0.0456006	2.74069	0.538262	1.2031	0.0591251	0.746034	0.0592344	3.41231	0.362027	3.76559	0.515706	1.32449	0.157479	1.27432	0.153172
AsGRAS29	Root	1	0	6.19193	0.542916	5.58147	0.160396	5.39263	1.01884	2.6445	0.314107	1.52914	0.220847	12.8318	0.734424	8.96816	0.638205	10.2265	0.689703	3.44907	0.169306	0.443651	0.190303
AsGRAS30	Leaf	1	0	1.99915	0.00537014	14.4315	0.683628	2.46036	0.0930733	2.21866	0.771899	1.33551	0.191761	0.522214	0.355384	2.82947	0.452858	3.21155	0.178819	8.6641	1.12743	2.48985	0.420901
AsGRAS30	Root	1	0	1.33735	0.218864	8.53544	1.07449	1.36122	0.132922	1.7213	0.287308	0.717699	0.226982	2.74117	0.114505	4.62613	0.168303	5.93652	0.232749	3.50206	1.02227	0.596225	0.328396
CK: control group; Dr: drought stress; Na: salt stress; SD:standard deviation
